# Supplementary material for: Insights into Elution of Anion Exchange Cartridges: Opening the Path toward Aliphatic 18F-Radiolabeling of Base-Sensitive Tracers
Source: PubMed Central journal article supplement — ACS Pharmacol Transl Sci. 2021 Aug 12;4(5):1556–66. doi: 10.1021/acsptsci.1c00133 (PMC8506604; doi:10.1021/acsptsci.1c00133), 2021-08-12
Supplement: pt1c00133_si_001.pdf [file pt1c00133_si_001.pdf]

# Supporting information

## **Insights into Elution of Anion Exchange Cartridges: Opening the Path towards Aliphatic $^{18}\text{F}$ -Radiolabeling of Base-Sensitive Tracers**

Klas Bratteby,<sup>†, #, §</sup> Vladimir Shalgunov,<sup>†, §</sup> Umberto Maria Battisti,<sup>†</sup> Ida Nyman Petersen,<sup>§</sup> Sara Lopes van den Broek,<sup>†</sup> Tomas Ohlsson,<sup>#</sup> Nic Gillings,<sup>§</sup> Maria Erlandsson,<sup>#</sup> and Matthias M. Herth<sup>†, §, \*</sup>

<sup>†</sup> Department of Drug Design and Pharmacology, University of Copenhagen, Jagtvej 160, 2100 Copenhagen, Denmark

<sup>#</sup>Department of Radiation Physics, Skåne University Hospital, Barngatan 3, 22242 Lund, Sweden

<sup>§</sup> Department of Clinical Physiology Nuclear Medicine & PET, Rigshospitalet, Blegdamsvej 9, 2100 Copenhagen, Denmark

**\*Corresponding author:**

Matthias M. Herth

Department of Drug Design and Pharmacology, University of Copenhagen

Jagtvej 160

2100 Copenhagen

Denmark

email: matthias.herth@sund.ku.dk

## Table of Contents

|                                                                                                                                  |     |
|----------------------------------------------------------------------------------------------------------------------------------|-----|
| General Experimental Information, organic synthesis.....                                                                         | S5  |
| Synthetic schemes for precursor and references.....                                                                              | S6  |
| Organic synthesis of precursors and references.....                                                                              | S9  |
| 2-(Tosyloxy)ethyl benzoate (2).....                                                                                              | S9  |
| 2-Fluoroethyl benzoate (3).....                                                                                                  | S9  |
| 2-Hydroxyethyl benzoate (4).....                                                                                                 | S10 |
| 2-((Methylsulfonyl)oxy)ethyl benzoate (5).....                                                                                   | S10 |
| 2-[[Trifluoromethane)sulfonyl]oxy}ethyl benzoate (6).....                                                                        | S10 |
| 2-[[4-Nitrobenzene)sulfonyl]oxy}ethyl benzoate (7a) and 2-Chloroethyl benzoate (7b).....                                         | S11 |
| 2-Hydroxyethyl 1-[(1 <i>R</i> )-1-phenylethyl]-1 <i>H</i> -imidazole-5-carboxylate (9).....                                      | S11 |
| 2-(Tosyloxy)ethyl ( <i>R</i> )-1-(1-phenylethyl)-1 <i>H</i> -imidazole-5-carboxylate (10).....                                   | S12 |
| 1-(2-(2-Oxo-6-(3-(tosyloxy)propyl)benzo[ <i>d</i> ]thiazol-3(2 <i>H</i> )-yl)ethyl)azepan-1-ium 2,2,2-trifluoroacetate (12)..... | S12 |
| ( <i>Z</i> )-9-Oxabicyclo[6.1.0]non-4-ene (14).....                                                                              | S13 |
| ( <i>Z</i> )-Cyclooct-4-enol (15).....                                                                                           | S13 |
| ( <i>Z</i> )-2-(Cyclooct-4-en-1-yloxy)ethanol (16).....                                                                          | S14 |
| ( <i>E</i> )-2-(Cyclooct-4-en-1-yloxy)ethanol (17).....                                                                          | S14 |
| ( <i>E</i> )-2-(Cyclooct-4-enyloxy)ethyl 4-methylbenzenesulfonate (18).....                                                      | S16 |
| ( <i>E</i> )-5-(2-Fluoroethoxy)cyclooct-1-ene (19).....                                                                          | S16 |
| 4-[(2-Hydroxyethoxy)methyl]benzotrile (21).....                                                                                  | S17 |
| 4-[[2-Hydroxyethoxy)methyl]-1,2,4,5-tetrazin-3-yl}benzene (22).....                                                              | S17 |
| 4-[[2-Fluoroethoxy)methyl]-1,2,4,5-tetrazin-3-yl}benzene (23).....                                                               | S18 |
| 4-{{2-[[Methane)sulfonyl]oxy}ethoxy}methyl}-1,2,4,5-tetrazin-3-yl}benzene (24).....                                              | S18 |
| 4-{{2-[[Toluene)sulfonyl]oxy}ethoxy}methyl}-1,2,4,5-tetrazin-3-yl}benzene (25).....                                              | S18 |
| 4-{{2-[[4-Nitrobenzene)sulfonyl]oxy}ethoxy}methyl}-1,2,4,5-tetrazin-3-yl}benzene (26)....                                        | S19 |
| 2-Fluoro-4-(1,2,4,5-tetrazin-3-yl)benzoic acid (28).....                                                                         | S19 |
| 2-Fluoro-4-(1,2,4,5-tetrazin-3-yl)-2-fluoroethyl-benzoate (29).....                                                              | S20 |
| 2-Fluoro-4-(1,2,4,5-tetrazin-3-yl)-2-hydroxyethyl-benzoate (30).....                                                             | S20 |
| 2-Fluoro-4-(1,2,4,5-tetrazin-3-yl)- 2-[[tolouene)sulfonyl]oxy}ethyl -benzoate (31).....                                          | S21 |
| 2-Fluoro-4-(1,2,4,5-tetrazin-3-yl)- 2-[[4-nitrobenzene)sulfonyl]oxy}ethyl -benzoate (32).....                                    | S21 |
| Radiochemistry general.....                                                                                                      | S22 |

|                                                                                                          |     |
|----------------------------------------------------------------------------------------------------------|-----|
| General method for elution experiments .....                                                             | S22 |
| General method for manual radiolabeling experiments .....                                                | S22 |
| Results from initial screening of anion exchange cartridge .....                                         | S24 |
| Screening and cold testing .....                                                                         | S34 |
| Initial radiolabeling tests .....                                                                        | S34 |
| Comparison of UV-trace from crude reactions for reactions using Cl <sup>-</sup> preconditioned QMA ..... | S35 |
| Non-basic elution of non-basic preconditioned QMA .....                                                  | S36 |
| Secondary addition of base to a non-basic preconditioning and elution .....                              | S36 |
| Screening preconditioning anions of different pK <sub>a</sub> and valency .....                          | S38 |
| Analysis of decayed reaction crudes with different preconditioning anions .....                          | S39 |
| “Cold” analysis of QMA using pH measurements and qNMR .....                                              | S41 |
| Analysis using pH meter .....                                                                            | S41 |
| Analysis using qNMR .....                                                                                | S43 |
| <sup>13</sup> C calibration .....                                                                        | S43 |
| <sup>1</sup> H calibration .....                                                                         | S44 |
| <sup>31</sup> P calibration .....                                                                        | S45 |
| qNMR analysis of QMA eluates .....                                                                       | S46 |
| Comparing resolubilization capabilities of different cations .....                                       | S47 |
| Multiparametric screening of elution conditions .....                                                    | S48 |
| Control experiments .....                                                                                | S52 |
| Longer reaction times for [ <sup>18</sup> F]3 .....                                                      | S52 |
| Remaining precursor analysis .....                                                                       | S53 |
| Testing different concentrations of precursor 2 .....                                                    | S54 |
| Temperature screening .....                                                                              | S54 |
| Leaving group screening .....                                                                            | S55 |
| Switching eluting solvent .....                                                                          | S56 |
| Automated radiosynthesis of clinically relevant tracers and synthons .....                               | S56 |
| Determination of molar activity (A <sub>m</sub> ) .....                                                  | S56 |
| Standard curves for determination of molar activity .....                                                | S57 |
| General method for automated radiosynthesis .....                                                        | S59 |
| [ <sup>18</sup> F]FE-PE2I .....                                                                          | S60 |
| [ <sup>18</sup> F]FETO .....                                                                             | S62 |
| [ <sup>18</sup> F]FTC-146 .....                                                                          | S63 |

|                                                                                                                                              |      |
|----------------------------------------------------------------------------------------------------------------------------------------------|------|
| [ <sup>18</sup> F]F-PEG <sub>3</sub> -azide .....                                                                                            | S65  |
| [ <sup>18</sup> F](2R,3R,4S,5R,6R)-2-Azido-6-(fluoromethyl)tetrahydro-2H-pyran-3,4,5-triyl triacetate<br>([ <sup>18</sup> F]sugarazide)..... | S67  |
| [ <sup>18</sup> F]FE-TCO .....                                                                                                               | S71  |
| [ <sup>18</sup> F]FTHA .....                                                                                                                 | S72  |
| [ <sup>18</sup> F]4-{{(2-Fluoroethoxy)methyl}-1,2,4,5-tetrazin-3-yl}benzene ([ <sup>18</sup> F]23) .....                                     | S74  |
| [ <sup>18</sup> F]2-Fluoro-4-(1,2,4,5-tetrazin-3-yl)-2-fluoroethyl-benzoate (29) .....                                                       | S78  |
| Leaving group screening for tetrazine labeling .....                                                                                         | S80  |
| Click kinetics of synthesized Tz references towards TCOs.....                                                                                | S81  |
| NMR spectra .....                                                                                                                            | S81  |
| References.....                                                                                                                              | S144 |

## General Experimental Information, organic synthesis

Commercial reagents were used without further purification. Analytical TLC was performed using silica gel 60 F<sub>254</sub> (Merck) with detection by UV absorption and/or by charring following immersion in a KMnO<sub>4</sub> solution (1.5 g of KMnO<sub>4</sub>, 10 g of K<sub>2</sub>CO<sub>3</sub>, and 1.25 mL of 10% NaOH in 200 mL of water). Purification of compounds was carried out by column chromatography on silica gel (40–60 μm, 60 Å). NMR spectra were acquired on a 600 MHz Bruker Avance III HD (600 MHz for <sup>1</sup>H and 151 MHz for <sup>13</sup>C), a 400 MHz Bruker Avance II (400 MHz for <sup>1</sup>H, 376 MHz for <sup>19</sup>F, 162 MHz for <sup>31</sup>P, and 101 MHz for <sup>13</sup>C), samples were measured at 300K. Chemical shift ( $\delta$ ) are expressed in parts per million and relative to tetramethylsilane and calibrated using solvent residual peak  $\delta^1\text{H}$  7.26,  $\delta^{13}\text{C}$  77.16. for CDCl<sub>3</sub> and  $\delta^1\text{H}$  2.50 and  $\delta^{13}\text{C}$  39.42 for *d*<sub>6</sub>-DMSO. The resonance multiplicity is abbreviated as: s (singlet), d (doublet), t (triplet), q (quartet) and m (multiplet) and was analyzed using MestReNova 12.0.1. Analytical HPLC method: Thermo Fisher UltiMate 3000 with a C-18 column (Luna 5 μm C18(2) 100 Å, 150 mm × 4.6 mm). Eluents: A, H<sub>2</sub>O with 0.1% TFA; B, MeCN with 0.1% TFA. Gradient from 100% A to 100% B over 15 min, back to 100% A over 4 min, flow rate 1.5 mL/min. Detection by UV absorption at  $\lambda$  = 254 nm if nothing else stated on a UVD 170U detector. Preparative high-performance liquid chromatography (HPLC) was performed on a Thermo Scientific Dionex 3000 UltiMate instrument connected to a Thermo Scientific Dionex 3000 Diode Array Detector using a Gemini-NX 5μ RP C18 column (250 × 21.2 mm) with UV detection at 254 nm. Mobile phase A: 0.1% TFA in water. Mobile phase B: 0.1% TFA, 10% water in MeCN. Flow rate: 20 mL/min, using a gradient from 100% A → 100% B over 15 min. Melting points were determined using a Büchi Melting Point B-540 apparatus. High resolution mass spectrometry (HRMS) was performed as matrix-assisted laser desorption/ionization time-of-flight mass spectrometry (MALDI-TOF). Analyses were performed in either positive or negative ion mode with ionization on a ThermoQExactive Orbitrap mass spectrometer (Thermo Scientific) equipped with an AP-SMALDI 10 ion source (TransmitMIT) and operated with mass resolving power 140,000 at *m/z* 200 and lock-mass for internal mass calibration. Samples were dissolved in a matrix consisting of 2,5-dihydroxybenzoic acid, 20 mg/mL, (positive mode) or 1,5-diaminonaphthalene, 5 mg/mL (negative mode). All the reference compounds and precursors were tested for purity using analytical HPLC-UV. Analytical HPLC method: Thermo Fisher UltiMate 3000 with a C-18 column (Luna 5 μm C18(2) 100 Å, 150 mm × 4.6 mm). Eluents: A, H<sub>2</sub>O with 0.1% TFA; B, MeCN with 0.1% TFA. Gradient from 100% A to 100% B over 15 min, back to 100% A over 4 min, flow rate 1.5 mL/min. Detection by UV absorption at  $\lambda$  = 254 nm if nothing else stated on a UVD 170U detector. All the compounds showed a purity  $\geq$  95%. Chemicals were purchased from ABX, PharmaSynth Fluorochem, Sigma or Merck and used as received.

## Synthetic schemes for precursor and references

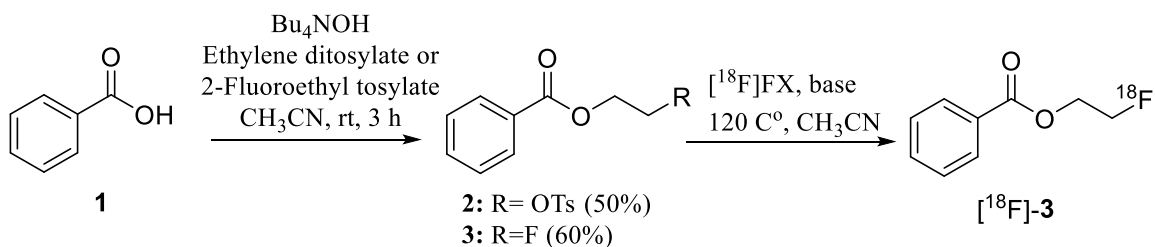

**Scheme S1** Synthesis and radiolabeling of precursor **2**.

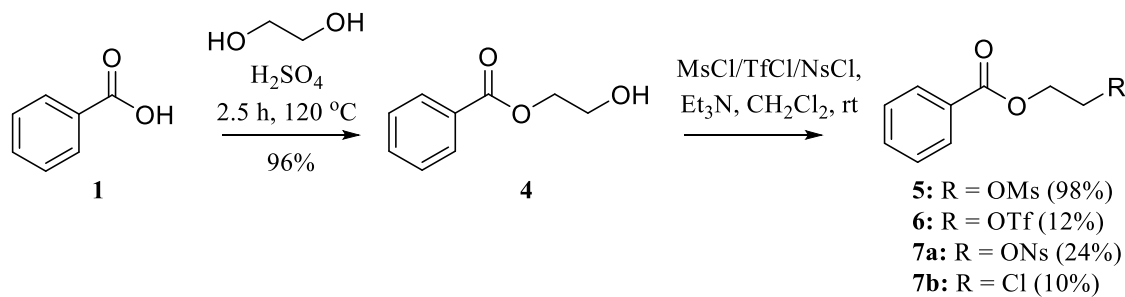

**Scheme S2** Synthesis of precursors **5**, **6** and **7a-b** to investigate the influence of different leaving groups.

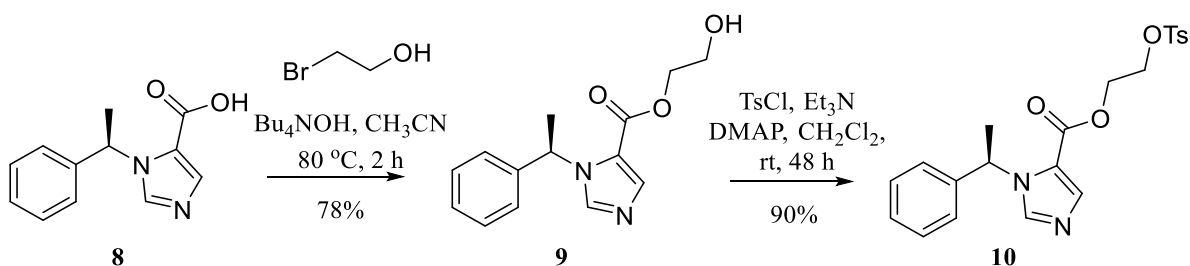

**Scheme S3** Synthetic route to obtain  $[\text{}^{18}\text{F}]\text{FETO}$  precursor **10**.

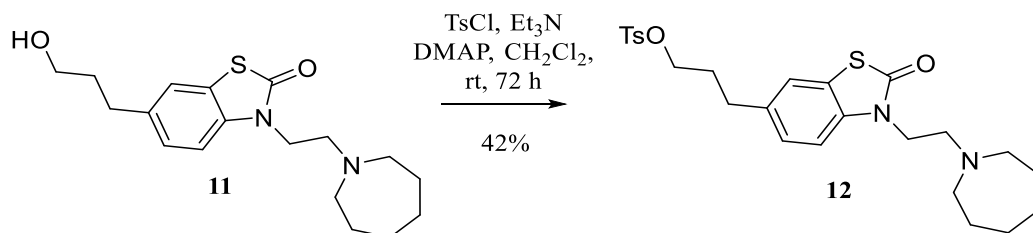

**Scheme S4** Synthetic route to obtain  $[\text{}^{18}\text{F}]\text{FTC-146}$  precursor **12**.

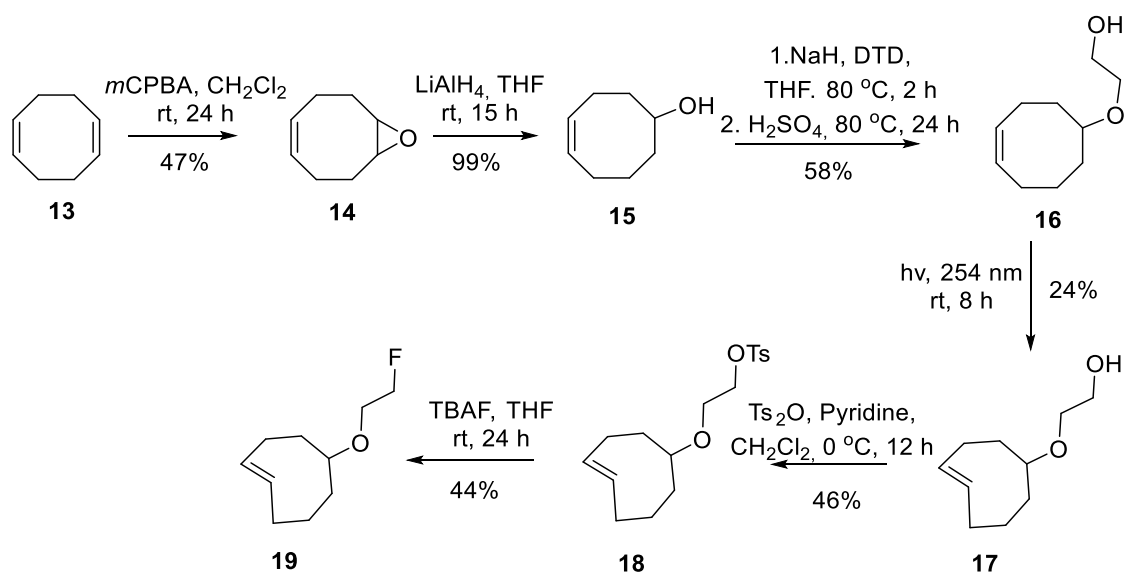

**Scheme S5** Synthetic route to obtain precursor **18** and reference **19** for labeling of [<sup>18</sup>F]-2-fluoroethyl-TCO.

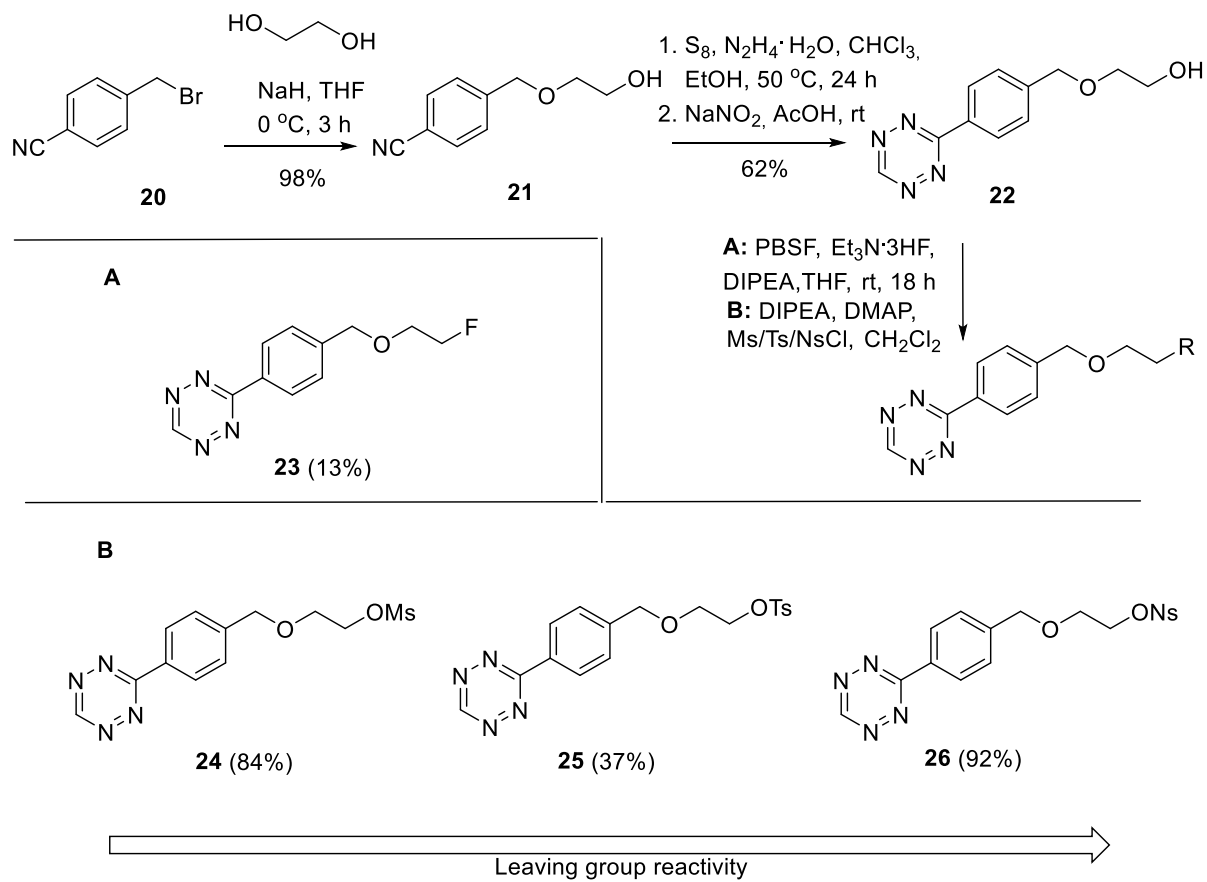

**Scheme S6** Synthetic route to obtain reference **23** and precursors **24, 25** and **26**.

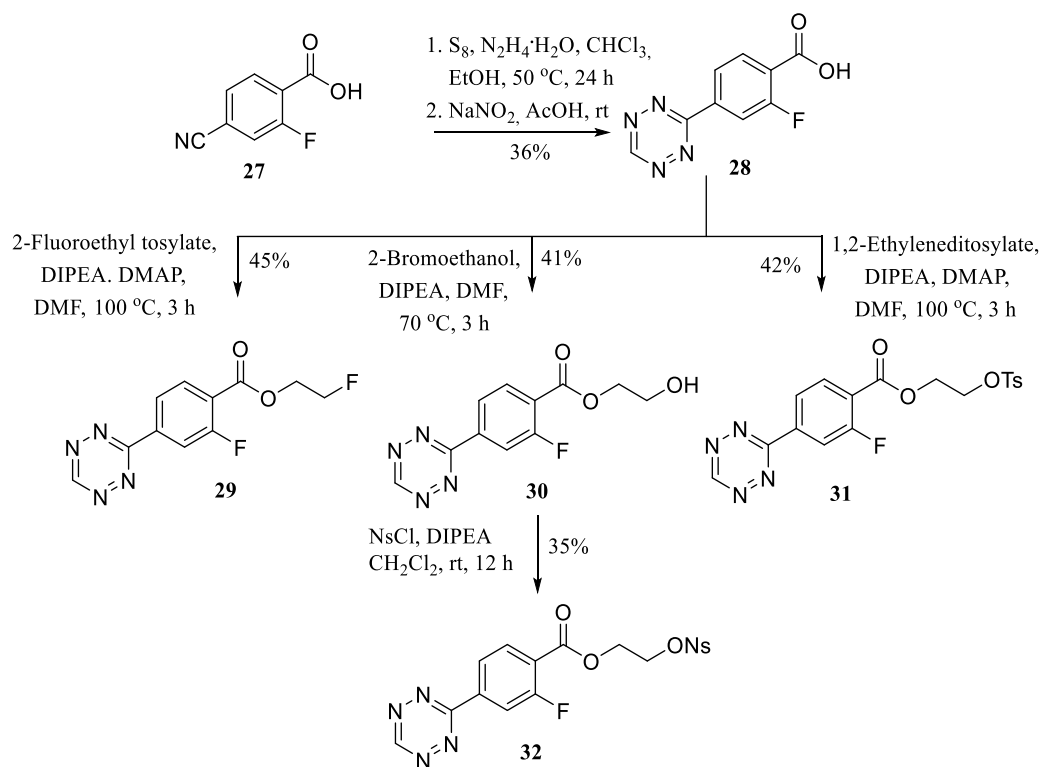

**Scheme S7** Synthesis of reference **29** and precursors **31** and **32**.



## Organic synthesis of precursors and references

### 2-(Tosyloxy)ethyl benzoate (2)

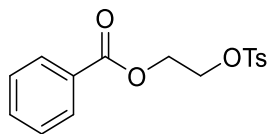

Benzoic acid (150 mg, 1.23 mmol 1.00 equiv.) was mixed with Bu<sub>4</sub>NOH (40% wt in MeOH, 1.20 mL, 1.84 mmol, 1.50 equiv.). Subsequently, H<sub>2</sub>O (2 mL) and toluene (2 mL) were added and the resulting mixture was stirred for 5 minutes. The volatiles were then removed under reduced pressure. The residue was redissolved in 5 mL of dry MeCN and cooled to 0 °C. Ethane-1,2-diyl bis(4-methylbenzenesulfonate) (683 mg, 1.84 mmol, 1.50 equiv.) was dissolved in 10 mL of dry MeCN and added to the reaction. The mixture was allowed to slowly reach room temperature and left for 3 additional hours. The reaction was then quenched with NH<sub>4</sub>Cl (sat., 20 mL) and extracted with EtOAc (3 x 20 mL). The organic phase was washed with brine (2 x 20 mL), dried over MgSO<sub>4</sub> and concentrated under reduced pressure. Purification by flash chromatography (n-heptane/EtOAc 70:30) yielded 2-(tosyloxy)ethyl benzoate (195 mg, 0.61 mmol, 50%) as a white solid. <sup>1</sup>H NMR (400 MHz, CDCl<sub>3</sub>) δ 7.98 – 7.91 (m, 2H), 7.82 – 7.75 (m, 2H), 7.61 – 7.54 (m, 1H), 7.42 (t, *J* = 7.8 Hz, 2H), 7.30 – 7.23 (m, 2H), 4.52 – 4.32 (m, 4H), 2.38 (s, 3H); <sup>13</sup>C NMR (151 MHz, CDCl<sub>3</sub>) δ 166.18, 145.13, 133.45, 132.96, 130.06, 129.91, 129.53, 128.52, 128.08, 67.88, 62.21, 21.79; HRMS (MALDI-TOF) calculated for C<sub>16</sub>H<sub>16</sub>O<sub>5</sub>S<sup>+</sup> [M+Na]<sup>+</sup>: 343.0610, found: 343.0610; Mp: 72-74 °C.

### 2-Fluoroethyl benzoate (3)

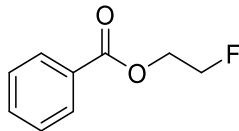

Benzoic acid (47 mg, 0.38 mmol 1.00 equiv.) was mixed with Bu<sub>4</sub>NOH (40% wt in MeOH, 408 μL, 0.57 mmol, 1.5 equiv.). Subsequently, H<sub>2</sub>O (2 mL) and toluene (2 mL) were added and the resulting mixture was stirred for 5 minutes. The volatiles were then removed under reduced pressure. The residue was redissolved in 5 mL of dry MeCN and cooled to 0 °C. 2-Fluoroethyltosylate (100 mg, 0.46 mmol, 1.2 equiv.) was dissolved in 1 mL of dry MeCN and added to the reaction dropwise under argon. The mixture was allowed to slowly reach room temperature and left for 3 additional hours. The reaction was diluted with EtOAc (20 mL) and washed with brine (2 x 20 mL) and water (2 x 20 mL). The organic phase was dried over Na<sub>2</sub>SO<sub>4</sub>, filtered, and concentrated under reduced pressure. Purification by flash chromatography (n-heptane/EtOAc 70:30) yielded 2-fluoroethyl benzoate (36 mg, 0.21 mmol, 56%) as a clear liquid. <sup>1</sup>H NMR (400 MHz, CDCl<sub>3</sub>) δ 8.16 – 8.06 (m, 2H), 7.64 – 7.53 (m, 1H), 7.51 – 7.40 (m, 2H), 4.85 – 4.75 (m, 1H), 4.72 – 4.65 (m, 1H), 4.63 – 4.58 (m, 1H), 4.56 – 4.50 (m, 1H); <sup>13</sup>C NMR (101 MHz, CDCl<sub>3</sub>) δ 166.53, 133.38, 129.91, 129.85, 128.57, 81.58 (*J*<sub>C-F</sub> = 170.8 Hz), 63.98 (*J*<sub>C-F</sub> = 20.2 Hz); <sup>19</sup>F NMR (376 MHz, CDCl<sub>3</sub>) δ -224.53; HRMS (MALDI-TOF) calculated for C<sub>9</sub>H<sub>9</sub>FO<sub>2</sub><sup>+</sup> [M+H]<sup>+</sup>: 169.0659, found: 169.0653.

## 2-Hydroxyethyl benzoate (4)

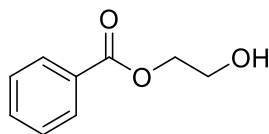

Sulfuric acid (0.5 mL, 0.5 equiv.) was added to a mixture of benzoic acid (2.40 g, 19.65 mmol, 1.00 equiv.) and ethylene glycol (5.40 g, 87.00 mmol, 4.43 equiv.). The mixture was heated to 120 °C and left stirring for 2.5 h. The mixture was cooled and quenched carefully with H<sub>2</sub>O (40 mL). The mixture was neutralized with a sat. solution of NaHCO<sub>3</sub>, further diluted with 60 mL of H<sub>2</sub>O and extracted with EtOAc (3 x 100 mL). The organic phase was dried over MgSO<sub>4</sub>, filtered, and concentrated under reduced pressure yielding 2-hydroxyethyl benzoate (3.14 g, 18.90 mmol, 96%) as a pale semisolid. The compound was used without further purification in the following reactions.

## 2-((Methylsulfonyl)oxy)ethyl benzoate (5)

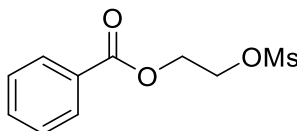

2-Hydroxyethyl benzoate (400 mg, 2.41 mmol, 1.00 equiv.) was dissolved in 5 mL of dry CH<sub>2</sub>Cl<sub>2</sub>. Et<sub>3</sub>N (504 μL, 3.61 mmol, 1.50 equiv.) and methanesulfonyl chloride (280 μL, 3.61 mmol, 1.50 equiv.) were added at 0 °C under argon atmosphere. The reaction was allowed to reach room temperature and then stirred for additional 60 minutes. The crude was diluted with 30 mL of CH<sub>2</sub>Cl<sub>2</sub> and then quenched with 20 mL of H<sub>2</sub>O. The aqueous phase was extracted with CH<sub>2</sub>Cl<sub>2</sub> (2 x 20 mL) and the combined organic layers were dried over MgSO<sub>4</sub>, filtered and concentrated under reduced pressure. Purification by flash chromatography (n-heptane/EtOAc, 50:50) yielded 2-((methylsulfonyl)oxy)ethyl benzoate (580 mg, 2.37 mmol, 98%) as an off-white solid. <sup>1</sup>H NMR (600 MHz, CDCl<sub>3</sub>) δ 8.06 (dt, *J* = 8.4, 1.1 Hz, 2H), 7.59 (ddt, *J* = 7.8, 6.9, 1.3 Hz, 1H), 7.49 – 7.43 (m, 2H), 4.62 – 4.58 (m, 2H), 4.58 – 4.54 (m, 2H), 3.06 (s, 3H); <sup>13</sup>C NMR (151 MHz, CDCl<sub>3</sub>) δ 166.28, 133.56, 129.89, 129.51, 128.66, 67.25, 62.48, 37.97; HRMS (MALDI-TOF) calculated for C<sub>10</sub>H<sub>12</sub>O<sub>5</sub>S<sup>+</sup> [M+Na]<sup>+</sup>: 267.0297, found: 267.0299; Mp: 53 °C.

## 2-(((Trifluoromethane)sulfonyl)oxy)ethyl benzoate (6)

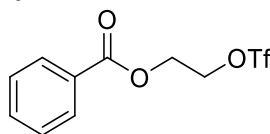

2-Hydroxyethyl benzoate (400 mg, 2.41 mmol, 1.00 equiv.) was dissolved in 5 mL of dry CH<sub>2</sub>Cl<sub>2</sub> and Et<sub>3</sub>N (504 μL, 3.61 mmol, 1.50 equiv.) and trifluoromethanesulfonyl chloride (381 μL, 3.61 mmol, 1.50 equiv.) was added at 0 °C under argon atmosphere. The reaction was allowed to reach room temperature and then stirred for additional 3 hours. The crude was diluted with 30 mL of CH<sub>2</sub>Cl<sub>2</sub> and then quenched with 20 mL H<sub>2</sub>O. The aqueous phase was extracted with CH<sub>2</sub>Cl<sub>2</sub> (2 x 20 mL). The combined organic layers were dried over MgSO<sub>4</sub>, filtered and concentrated under reduced pressure. Purification by flash chromatography (n-heptane/EtOAc, 70:30) yielded 2-(((trifluoromethane)sulfonyl)oxy)ethyl benzoate (85 mg, 0.29 mmol, 12%) as a pale semisolid. <sup>1</sup>H NMR (400 MHz, CDCl<sub>3</sub>) δ 8.11 – 8.04 (m, 2H), 7.58

(td,  $J = 7.3, 1.3$  Hz, 1H), 7.50 – 7.41 (m, 2H), 4.58 (dd,  $J = 6.3, 5.2$  Hz, 2H), 3.82 (dd,  $J = 6.3, 5.2$  Hz, 2H);  $^{13}\text{C}$  NMR (101 MHz,  $\text{CDCl}_3$ )  $\delta$  166.34, 133.42 (2C), 129.90, 129.79, 128.59, 64.60, 41.82;  $^{19}\text{F}$  NMR (376 MHz,  $\text{CDCl}_3$ )  $\delta$  -78.40; HRMS (MALDI-TOF) calculated for  $\text{C}_{10}\text{H}_{10}\text{F}_3\text{O}_5\text{S}$   $[\text{M}+\text{H}]^+$ : 299.0195, found: 299.0197.

## 2-[[4-Nitrobenzene)sulfonyl]oxy]ethyl benzoate (7a) and 2-Chloroethyl benzoate (7b)

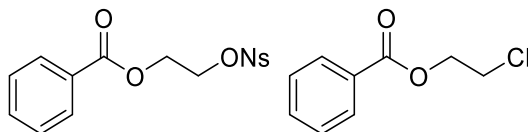

2-Hydroxyethyl benzoate (150 mg, 0.90 mmol, 1.00 equiv.) and nitrobenzenesulfonyl chloride (600 mg, 2.71 mmol, 3.00 equiv.) were dissolved in 10 mL of dry  $\text{CH}_2\text{Cl}_2$  under argon at 0 °C. A mixture of DIPEA (629  $\mu\text{L}$ , 3.61 mmol, 4.00 equiv.) and DMAP (22 mg, 0.18 mmol, 0.20 equiv.) in 3 mL of dry  $\text{CH}_2\text{Cl}_2$  was subsequently added under argon and the reaction was slowly allowed to reach room temperature and stirred for additional 3 hours. The reaction was diluted with 10 mL of  $\text{CH}_2\text{Cl}_2$  and washed with a saturated solution of  $\text{NH}_4\text{Cl}$  (20 mL) and  $\text{H}_2\text{O}$  (2 x 20 mL). The organic phase was dried over  $\text{Na}_2\text{SO}_4$ , filtered, and concentrated under reduced pressure. Purification by flash chromatography (n-heptane/EtOAc, 60:40) and recrystallization in EtOAc/n-heptane yielded 2-[[4-nitrobenzene)sulfonyl]oxy]ethyl benzoate (76 mg, 0.22 mmol, 24%) as an off-white solid.  $^1\text{H}$  NMR (600 MHz,  $\text{CDCl}_3$ )  $\delta$  8.27 – 8.21 (m, 2H), 8.10 – 8.04 (m, 2H), 7.90 – 7.84 (m, 2H), 7.58 (tt,  $J = 7.4, 1.3$  Hz, 1H), 7.45 – 7.37 (m, 2H), 4.55 – 4.50 (m, 4H).  $^{13}\text{C}$  NMR (151 MHz,  $\text{CDCl}_3$ )  $\delta$  165.97, 150.77, 141.78, 133.81, 129.74, 129.27, 129.12, 128.62, 124.58, 69.16, 61.90.; HRMS (MALDI-TOF) calculated for  $\text{C}_{15}\text{H}_{13}\text{NO}_7\text{S}$   $[\text{M}+\text{H}]^+$ : 352.0485, found: 352.0490; Mp: 135-137 °C.

During flash chromatography 2-chloroethyl benzoate was also isolated (17 mg, 0.09 mmol, 10%) as a clear liquid.  $^1\text{H}$  NMR (600 MHz,  $\text{CDCl}_3$ ):  $\delta$  8.09 – 8.05 (m, 2H), 7.60 – 7.55 (m, 1H), 7.48 – 7.42 (m, 2H), 4.60 – 4.55 (m, 2H), 3.84 – 3.79 (m, 2H);  $^{13}\text{C}$  NMR (151 MHz,  $\text{CDCl}_3$ )  $\delta$  166.31, 133.40, 129.88, 129.77, 128.58, 64.58, 41.80; HRMS (MALDI-TOF) calculated for  $\text{C}_9\text{H}_9\text{ClO}_2$   $[\text{M}+\text{H}]^+$ : 184.0291, found: 184.0285.

## 2-Hydroxyethyl 1-[(1R)-1-phenylethyl]-1H-imidazole-5-carboxylate (9)

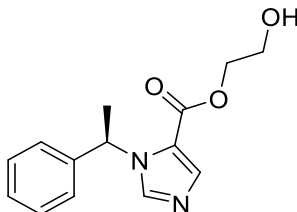

(*R*)-1-(1-phenylethyl)-1*H*-imidazole-5-carboxylic acid (30 mg, 0.14 mmol, 1.00 equiv.) was dissolved in  $\text{CH}_2\text{Cl}_2$  (2 mL) and  $\text{Bu}_4\text{NOH}$  (40% in MeOH, 99  $\mu\text{L}$ , 0.15 mmol, 1.10 equiv.) was added. The solution was concentrated under reduced pressure. The residue was dissolved in 2 mL  $\text{CH}_2\text{Cl}_2$  and concentrated again two times. The dried reagents were redissolved in 2 mL of dry MeCN under argon. 2-Bromoethanol (43  $\mu\text{L}$ , 0.61 mmol, 4.40 equiv.) was dissolved in 0.5 mL of dry MeCN and added to the reaction under argon. The reaction was heated to reflux for 2 h. The solution was diluted with  $\text{CH}_2\text{Cl}_2$  (10 mL) and washed with sat.  $\text{NaHCO}_3$  solution (10 mL). The organic phase was dried over  $\text{Na}_2\text{SO}_4$ , filtered, and concentrated under reduced pressure. Purification by flash chromatography ( $\text{CH}_2\text{Cl}_2/\text{MeOH}$ , 95:5)

yielded 2-hydroxyethyl 1-[(1*R*)-1-phenylethyl]-1*H*-imidazole-5-carboxylate (28 mg, 0.11 mmol, 78%) as a clear oil. <sup>1</sup>H NMR (400 MHz, CDCl<sub>3</sub>) δ 7.84 – 7.73 (m, 2H), 7.36 – 7.24 (m, 3H), 7.21 – 7.14 (m, 2H), 6.33 (q, *J* = 7.1 Hz, 1H), 4.41 – 4.25 (m, 2H), 3.85 (t, *J* = 4.6 Hz, 2H), 3.79 (s, 1H), 1.84 (d, *J* = 7.1 Hz, 3H); <sup>13</sup>C NMR (101 MHz, CDCl<sub>3</sub>) δ 160.31, 140.84, 139.85, 137.81, 129.01, 128.25, 126.39, 122.47, 66.54, 60.72, 55.72, 22.25; HRMS (MALDI-TOF) calculated for C<sub>14</sub>H<sub>16</sub>N<sub>2</sub>O<sub>3</sub> [M+H]<sup>+</sup>: 261.1233, found: 261.1236.

### 2-(Tosyloxy)ethyl (*R*)-1-(1-phenylethyl)-1*H*-imidazole-5-carboxylate (10)

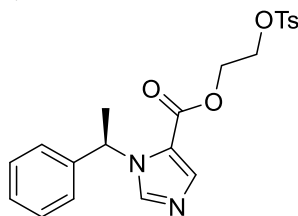

2-Hydroxyethyl 1-[(1*R*)-1-phenylethyl]-1*H*-imidazole-5-carboxylate (28 mg, 0.11 mmol, 1.00 equiv.) and tosyl chloride (92 mg, 0.48 mmol, 5.00 equiv.) were dissolved in dry CH<sub>2</sub>Cl<sub>2</sub> (2 mL). Et<sub>3</sub>N (67 μL, 0.48 mmol, 5.00 equiv.) and DMAP (1 mg, 0.01 mmol, 0.10 equiv.) were solubilized in 0.5 mL of dry CH<sub>2</sub>Cl<sub>2</sub> and added under argon at 0 °C. The reaction was allowed to reach room temperature and left stirring for additional 2 days. The reaction was then diluted with CH<sub>2</sub>Cl<sub>2</sub> (10 mL), washed with a NH<sub>4</sub>Cl saturated solution (10 mL) and H<sub>2</sub>O (2 x 10 mL). The organic phase was dried over Na<sub>2</sub>SO<sub>4</sub>, filtered and concentrated under reduced pressure. Purification by flash chromatography (CH<sub>2</sub>Cl<sub>2</sub>/MeOH, 97:3) yielded 2-(tosyloxy)ethyl (*R*)-1-(1-phenylethyl)-1*H*-imidazole-5-carboxylate (36 mg, 0.09 mmol, 90%) as a pale semisolid. <sup>1</sup>H NMR (600 MHz, CDCl<sub>3</sub>) δ 7.87 – 7.82 (m, 1H), 7.79 – 7.74 (m, 2H), 7.67 (d, *J* = 1.1 Hz, 1H), 7.37 – 7.27 (m, 5H), 7.20 – 7.15 (m, 2H), 6.28 (q, *J* = 7.1 Hz, 1H), 4.39 (qdd, *J* = 12.5, 5.1, 4.0 Hz, 2H), 4.28 (ddd, *J* = 5.6, 3.7, 1.5 Hz, 2H), 2.43 (s, 3H), 1.85 (d, *J* = 7.3 Hz, 3H); <sup>13</sup>C NMR (151 MHz, CDCl<sub>3</sub>): δ 159.33, 145.33, 140.57, 139.88, 137.73, 132.84, 130.08, 129.12, 128.42, 128.03, 126.43, 121.94, 67.45, 61.79, 56.01, 22.26, 21.79; HRMS (MALDI-TOF) calculated for C<sub>21</sub>H<sub>22</sub>N<sub>2</sub>O<sub>5</sub>S [M+H]<sup>+</sup>: 415.1322, found: 415.1321.

### 1-(2-(2-Oxo-6-(3-(tosyloxy)propyl)benzo[*d*]thiazol-3(2*H*)-yl)ethyl)azepan-1-ium 2,2,2-trifluoroacetate (12)

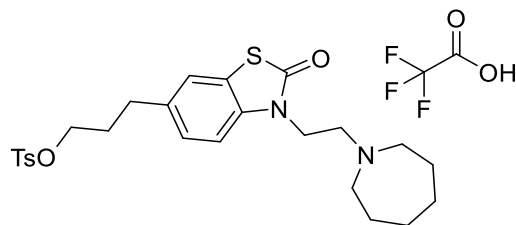

Tosyl chloride (103 mg, 0.54 mmol, 3.00 equiv.) was dissolved in 2 mL of dry CH<sub>2</sub>Cl<sub>2</sub>, DIPEA (125 μL, 0.72 mmol, 4.00 equiv.) and DMAP (5 mg, 0.04 mmol, 0.20 equiv.) were then added. 3-(2-(Azepan-1-yl)-6-(3-hydroxypropyl)benzo[*d*]thiazol-2(3*H*)-one (60 mg, 0.18 mmol) was dissolved in 1 mL of dry CH<sub>2</sub>Cl<sub>2</sub> and added dropwise under argon. The resulting mixture was left at room temperature for 3 days.

The crude was diluted with CH<sub>2</sub>Cl<sub>2</sub> (20 mL) and washed with a NH<sub>4</sub>Cl saturated solution (10 mL) and water (2 x 10 mL). The organic phase was dried over Na<sub>2</sub>SO<sub>4</sub>, filtered, and concentrated under reduced pressure. Purification by preparative HPLC (gradient: MeCN/H<sub>2</sub>O + 0.1% TFA 0:100 → 90:10), yielded 3-(3-(2-(azepan-1-yl)ethyl)-2-oxo-2,3-dihydrobenzo[*d*]-thiazol-6-yl)propyl 4-methylbenzenesulfonate as a TFA salt (46 mg, 0.08 mmol, 42%, yellow oil). Starting material was also recovered during the purification (20 mg). <sup>1</sup>H NMR (600 MHz, CDCl<sub>3</sub>) δ 11.32 (s, 1H), 7.82 – 7.77 (m, 2H), 7.42 – 7.35 (m, 3H), 7.13 (d, *J* = 1.7 Hz, 1H), 7.11 (dd, *J* = 8.3, 1.8 Hz, 1H), 4.52 (dd, *J* = 8.8, 6.7 Hz, 2H), 4.02 (t, *J* = 6.1 Hz, 2H), 3.65 (ddt, *J* = 13.2, 8.0, 2.5 Hz, 2H), 3.40 – 3.33 (m, 2H), 3.11 (dddd, *J* = 13.2, 8.9, 6.8, 2.0 Hz, 2H), 2.71 – 2.64 (m, 2H), 2.47 (s, 3H), 2.17 – 2.04 (m, 2H), 1.99 – 1.81 (m, 6H), 1.69 (td, *J* = 9.7, 5.1 Hz, 2H); <sup>13</sup>C NMR (151 MHz, CDCl<sub>3</sub>) δ 170.84, 158.81 (q, *J*<sub>C-F</sub> = 41.6 Hz, TFA), 145.10, 136.94, 134.12, 133.17, 130.09, 128.05, 127.63, 122.82, 122.52, 114.86 (q, *J*<sub>C-F</sub> = 286.0 Hz, TFA), 111.57, 69.32, 55.49, 53.18, 37.57, 31.24, 30.68, 26.57, 23.75, 21.83; HRMS (MALDI-TOF) calculated for C<sub>25</sub>H<sub>32</sub>N<sub>2</sub>O<sub>4</sub>S<sub>2</sub> [M+H]<sup>+</sup>: 489.1876, found: 489.1881.

### (*Z*)-9-Oxabicyclo[6.1.0]non-4-ene (14)

(*Z*)-9-Oxabicyclo[6.1.0]non-4-ene was prepared by the following procedure adapted from Clark et al<sup>1</sup>. *Cis,cis*-1,5-cyclooctadiene (22.0 g, 203.36 mmol, 1.00 equiv.) and dry CH<sub>2</sub>Cl<sub>2</sub> (300 mL) were added to a 500 mL round-bottom flask. The mixture was cooled to 0 °C with an ice bath and mCPBA (45.57 g, 203.36 mmol, 1.00 equiv.) was added portion wise to give a white suspension. The mixture was allowed to reach room temperature and left stirring overnight. The mixture was filtered and washed with NaHCO<sub>3</sub> saturated solution (3 x 100 mL) and NaCl saturated solution (100 mL). The organic layer was collected, dried with MgSO<sub>4</sub>, filtered, and concentrated under reduced pressure. Purification by flash chromatography (n-heptane/EtOAc, 90:10) yielded (*Z*)-9-oxabicyclo[6.1.0]non-4-ene (11.82 g, 95.16 mmol, 47%) as a colorless oil. <sup>1</sup>H NMR (600 MHz, CDCl<sub>3</sub>) δ 5.69 – 5.48 (m, 2H), 3.15 – 2.91 (m, 2H), 2.55 – 2.35 (m, 2H), 2.21 – 2.08 (m, 2H), 2.08 – 1.86 (m, 4H); <sup>13</sup>C NMR (151 MHz, CDCl<sub>3</sub>) δ 129.00, 56.87, 28.25, 23.82. <sup>1</sup>H and <sup>13</sup>C NMR spectroscopic data for **14** were identical to that previously reported.<sup>1</sup>

### (*Z*)-Cyclooct-4-enol (15)

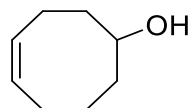

(*Z*)-Cyclooct-4-enol was prepared by the following procedure adapted from Kurra et al<sup>2</sup>. Lithium aluminum hydride tablets (3.26 g, 85.93 mmol, 3.00 equiv.) were added to an oven-dried 500 mL three-necked round-bottom flask. The flask was sealed and flushed with argon. The flask was cooled to 0 °C using an ice-bath and dry THF (120 mL) was added slowly while vigorously stirring to give a grey suspension. (*Z*)-9-Oxabicyclo[6.1.0]non-4-ene (3.56 g, 28.64 mmol, 1.00 equiv.) in dry THF (10 mL) was added dropwise and the mixture was allowed to reach room temperature and stirred overnight. The mixture was cooled to 0 °C in an ice bath and quenched with EtOAc (120 mL). A saturated solution of Rochelle salt (100 mL) was added and the mixture was stirred vigorously for 10 minutes. The mixture

was transferred to a separatory funnel and the organic layer was collected. The aqueous layer was extracted with CH<sub>2</sub>Cl<sub>2</sub> (3 x 150 mL). The combined organic layers were washed with H<sub>2</sub>O (200 mL), dried over MgSO<sub>4</sub>, filtered and concentrated under reduced pressure to give (Z)-cyclooct-4-enol (3.49 g, 28.45 mmol, 99%) <sup>1</sup>H NMR (600 MHz, CDCl<sub>3</sub>) δ 5.75 – 5.63 (m, 1H), 5.61 – 5.52 (m, 1H), 3.86 – 3.75 (m, 1H), 2.36 – 2.24 (m, 1H), 2.20 – 2.04 (m, 3H), 1.97 (s, 1H), 1.93 – 1.88 (m, 1H), 1.86 – 1.81 (m, 1H), 1.75 – 1.68 (m, 1H), 1.67 – 1.59 (m, 1H), 1.56 – 1.46 (m, 2H); <sup>13</sup>C NMR (151 MHz, CDCl<sub>3</sub>) δ 130.23, 129.63, 72.85, 37.75, 36.36, 25.75, 24.97, 22.88. <sup>1</sup>H and <sup>13</sup>C NMR spectroscopic data for **15** were identical to that previously reported.<sup>1</sup>

**(Z)-2-(Cyclooct-4-en-1-yloxy)ethanol (16)**

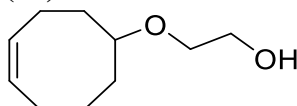

(Z)-2-(Cyclooct-4-en-1-yloxy)ethanol was prepared by the following procedure adapted from Collins et al.<sup>3</sup> Sodium hydride (60% dispersion in mineral oil, 633 mg, 15.84 mmol, 2.00 equiv.) was added to an oven-dried vial and flushed with argon. Dry THF (10 mL) was added to give a grey suspension. A solution of (Z)-cyclooct-4-enol (1.00 g, 7.92 mmol, 1.00 equiv.) in dry THF (4 mL) was added and the mixture was heated to 80 °C for 1 hour. The mixture was cooled to 0 °C with an ice bath and a solution of ethylene sulfate (1.96 g, 15.84 mmol, 2.00 equiv.) in dry THF (5 mL) was added slowly to the mixture. The reaction was heated to 80 °C and stirred for 1.5 hours. The mixture solidified partially and dry THF (10 mL) was added. The solution was cooled to 50 °C and stirred overnight. TLC showed presence of starting material and the mixture was heated to 80 °C and stirred for two hours. The reaction was cooled to room temperature and H<sub>2</sub>O (1 mL) was added dropwise, followed by the dropwise addition of conc. H<sub>2</sub>SO<sub>4</sub> (1 mL). The mixture was heated to 80 °C and stirred overnight. The reaction was cooled to room temperature and the mixture was neutralized with 5M NaOH. The solution was transferred to a separatory funnel and the organic layer was collected and the aqueous layer was extracted with CH<sub>2</sub>Cl<sub>2</sub> (3 x 20 mL). The combined organic layers were washed with H<sub>2</sub>O (30 mL) and dried, filtered and concentrated to give the crude product as a yellow oil (1.464 g). The yellow oil was purified by flash chromatography (n-heptane/EtOAc, 70:30) to give the desired product as a colorless oil (782 mg, 58%). <sup>1</sup>H NMR (600 MHz, CDCl<sub>3</sub>) δ 5.70 – 5.64 (m, 1H), 5.63 – 5.56 (m, 1H), 3.73 – 3.63 (m, 2H), 3.60 – 3.51 (m, 1H), 3.51 – 3.45 (m, 1H), 3.42 – 3.35 (m, 1H), 2.42 – 2.29 (m, 1H), 2.23 – 2.10 (m, 2H), 2.05 (tdd, *J* = 10.2, 6.9, 3.9 Hz, 1H), 2.01 – 1.88 (m, 1H), 1.87 – 1.63 (m, 3H), 1.51 (s, 1H), 1.48 – 1.31 (m, 1H); <sup>13</sup>C NMR (151 MHz, CDCl<sub>3</sub>) δ 130.15, 129.64, 81.11, 69.40, 62.26, 34.30, 33.51, 25.95, 25.71, 22.75. <sup>1</sup>H and <sup>13</sup>C NMR spectroscopic data for **16** were identical to that previously reported.<sup>3</sup>

**(E)-2-(Cyclooct-4-en-1-yloxy)ethanol (17)**

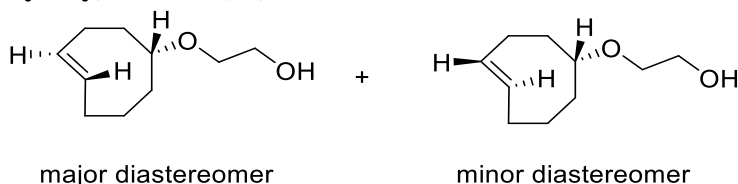

(E)-2-(Cyclooct-4-en-1-yloxy)ethanol was prepared by the following procedure adapted from Royzen et al.<sup>4</sup>

**Photoreactor Preparations:** The photochemical set-up is shown above. The bottom of a 40 g column (Flash Cartridge, Screw Top, Luer Lock end fittings, includes top and bottom frit, o-ring, dispersing insert) was packed with dry silica gel (8 cm), and the top was packed with silver impregnated silica (10% AgNO<sub>3</sub>, ~17 g). The column was attached to the pump and the Rayonet® reactor by PTFE tubing and the column was flushed with a diethyl ether/n-heptane mixture (ratio 9:1, 500 mL) at a flow rate of 100 mL/min. The column was covered with aluminum to protect the silver from light, see *Figure S1*. The photoreactor and cooler were turned on and the solvent was pumped through the system for 10 minutes. After 10 minutes, the photoreactor was turned off.

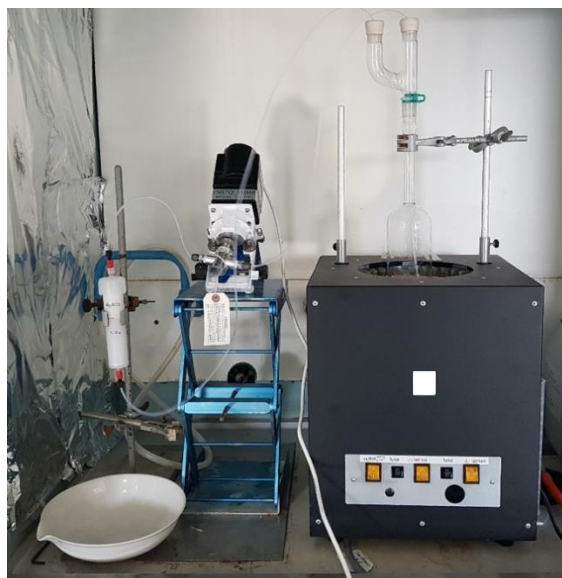

**Figure S1.** Photo of the set-up of the photoreactor used for trapping and isomerization of the TCOs.

### Experimental Procedure

(Z)-2-(Cyclooct-4-en-1-yloxy)ethanol (782 mg, 4.59 mmol, 1.00 equiv.) was dissolved in a diethyl ether/n-heptane mixture (ratio 9:1, 500 mL) and was added to a 1500 mL quartz flask. Methyl benzoate (10 mL, 5.00 mmol, 1.09 equiv.) was added to the mixture. The FMI pump was set at a flowrate of 100 mL/min and the Rayonet® reactor equipped with 16x 254nm lamps (RPR-2537A) was turned on and photolysis was carried out for 8 hours. After 8 hours, the photoreactor was turned off, and the column was flushed with an additional 200 mL of ether/n-heptane (ratio 9:1) and dried with a stream of compressed air. The silica was poured into a 500 mL Erlenmeyer flask and NH<sub>4</sub>OH (200 mL) and CH<sub>2</sub>Cl<sub>2</sub> (200 mL) were added. The mixture was stirred vigorously for 10 minutes. The silica was filtered off and the residue was transferred to a separatory funnel. The organic layer was collected, and the aqueous layer was back extracted with CH<sub>2</sub>Cl<sub>2</sub> (200 mL). The combined organic layers were washed with H<sub>2</sub>O (200 mL), dried over MgSO<sub>4</sub>, filtered, and concentrated to give the crude product as a colorless oil (458 mg). The oil was purified using flash chromatography (n-heptane/EtOAc 70:30) to give the desired compound as separated diastereomers (235 mg, major isomer 24.3%, minor isomer 5.8%). Major product. <sup>1</sup>H NMR (600 MHz, CDCl<sub>3</sub>) δ 5.58 (ddd, *J* = 15.3, 11.3, 3.6 Hz, 1H), 5.38 (ddd, *J* = 15.8, 11.1, 3.6 Hz, 1H), 3.67 (ddd, *J* = 5.5, 3.7, 1.6 Hz, 2H), 3.49 (ddd, *J* = 9.4, 5.4, 3.8 Hz, 1H), 3.39 (ddd, *J* = 9.6, 5.4, 3.9 Hz, 1H), 3.03 (ddt, *J* = 10.7, 5.1, 1.4 Hz, 1H), 2.44 – 2.31 (m, 2H), 2.24 (qd, *J* = 11.9, 5.2 Hz, 1H), 2.14 – 2.07 (m, 1H), 2.02 – 1.91 (m, 2H), 1.89 – 1.73 (m, 2H), 1.58 – 1.42 (m, 2H); <sup>13</sup>C NMR (151 MHz, CDCl<sub>3</sub>) δ

135.49, 132.43, 86.23, 69.29, 62.22, 40.95, 37.98, 34.65, 33.12, 31.85. Minor product.  $^1\text{H}$  NMR (600 MHz,  $\text{CDCl}_3$ )  $\delta$  5.62 – 5.54 (m, 1H), 5.53 – 5.43 (m, 1H), 3.79 – 3.71 (m, 2H), 3.66 – 3.58 (m, 1H), 3.55 (ddd,  $J = 9.2, 5.0, 4.0$  Hz, 1H), 3.44 (ddd,  $J = 9.6, 5.5, 4.1$  Hz, 1H), 2.39 – 2.28 (m, 2H), 2.26 – 2.22 (m, 1H), 2.22 – 2.15 (m, 1H), 2.08 – 1.99 (m, 1H), 1.87 – 1.71 (m, 3H), 1.55 – 1.47 (m, 1H), 1.28 – 1.15 (m, 1H);  $^{13}\text{C}$  NMR (151 MHz,  $\text{CDCl}_3$ )  $\delta$  135.95, 131.50, 75.17, 69.82, 62.33, 40.34, 34.59, 33.11, 29.95, 27.77.  $^1\text{H}$  and  $^{13}\text{C}$  NMR spectroscopic data for **17** were identical to that previously reported.<sup>3</sup>

**(*E*)-2-(Cyclooct-4-enyloxy)ethyl 4-methylbenzenesulfonate (18)**

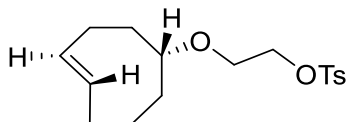

(*E*)-2-(Cyclooct-4-enyloxy)ethyl 4-methylbenzenesulfonate was prepared by the following procedure adapted from Collins et al.<sup>3</sup> Dry  $\text{CH}_2\text{Cl}_2$  (5 mL) and (*E*)-2-(Cyclooct-4-en-1-yloxy)ethanol (major isomer, 190 mg, 1.12 mmol, 1.00 equiv.) were added to a 20 mL microwave vessel and the mixture was cooled to 0 °C using an ice bath and anhydrous pyridine (180  $\mu\text{L}$ , 2.23 mmol, 2.00 equiv.) was added. The mixture was stirred for 5 minutes and 4-methylbenzenesulfonic acid anhydride (389 mg, 1.19 mmol, 1.07 equiv.) was added. The mixture was allowed to reach room temperature and stirred overnight.  $\text{CH}_2\text{Cl}_2$  (10 mL) was added, and the mixture was washed with  $\text{H}_2\text{O}$  (25 mL), 1M HCl (25 mL), sat.  $\text{NaHCO}_3$  (25 mL) and sat. NaCl (25 mL). The organic layer was collected, dried over  $\text{MgSO}_4$ , filtered and concentrated. The crude product (252 mg) was purified by flash chromatography (n-heptane/EtOAc; 90:10), to give the desired product as a colorless oil (165 mg, 46%).  $^1\text{H}$  NMR (400 MHz,  $\text{CDCl}_3$ )  $\delta$  7.79 (d,  $J = 8.4$  Hz, 2H), 7.33 (d,  $J = 8.1$  Hz, 2H), 5.54 (ddd,  $J = 15.3, 11.3, 3.6$  Hz, 1H), 5.33 (ddd,  $J = 15.7, 10.9, 3.6$  Hz, 1H), 4.11 (t,  $J = 4.9$  Hz, 2H), 3.61 – 3.37 (m, 2H), 2.97 – 2.92 (m, 1H), 2.44 (s, 3H), 2.38 – 2.30 (m, 2H), 2.26 – 2.11 (m, 1H), 2.01 – 1.85 (m, 3H), 1.82 – 1.63 (m, 2H), 1.47 – 1.35 (m, 2H);  $^{13}\text{C}$  NMR (101 MHz,  $\text{CDCl}_3$ )  $\delta$  144.85, 135.43, 133.35, 132.41, 129.91, 128.13, 86.45, 69.70, 65.77, 40.72, 37.76, 34.61, 33.04, 31.81, 21.78.  $^1\text{H}$  and  $^{13}\text{C}$  NMR spectroscopic data for **18** were identical to that previously reported.<sup>3</sup>

**(*E*)-5-(2-Fluoroethoxy)cyclooct-1-ene (19)**

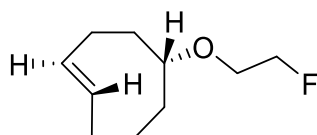

(*E*)-5-(2-Fluoroethoxy)cyclooct-1-ene methylbenzenesulfonate was prepared by the following procedure adapted from Collins et al.<sup>3</sup> To an oven-dried 5 mL microwave vessel, dry THF (1.5 mL) and (*E*)-2-(cyclooct-4-enyloxy)ethyl 4-methylbenzenesulfonate (30 mg, 0.0925 mmol, 1.00 equiv.) were added. The vessel was sealed and flushed with argon. TBAF (1M in THF, 278  $\mu\text{L}$ , 0.28 mmol, 3.00 equiv.) was added and the mixture was protected from light and stirred at room temperature for 24 hours. The crude product was directly subjected to column chromatography (n-heptane/EtOAc 90:10) to give the desired product as a colorless oil (7 mg, 44%).  $^1\text{H}$  NMR (400 MHz,  $\text{CDCl}_3$ )  $\delta$  5.58 (ddd,  $J = 15.2, 11.1, 3.6$  Hz, 1H), 5.37 (ddd,  $J = 16.0, 11.0, 3.6$  Hz, 1H), 4.56 (t,  $J = 4.3$  Hz, 1H), 4.44 (t,  $J = 4.3$  Hz, 1H), 3.73 – 3.39 (m, 2H), 3.11 – 2.99 (m, 1H), 2.49 – 2.32 (m, 2H), 2.30 – 2.15 (m, 1H), 2.11 (dd,  $J = 13.2, 5.0$  Hz, 1H), 2.08 – 1.78 (m, 4H), 1.65 – 1.43 (m, 2H);  $^{13}\text{C}$  NMR (101 MHz,  $\text{CDCl}_3$ )  $\delta$  135.53, 132.41, 86.40, 83.41



( $J_{C-F}$  = 168.9 Hz), 67.42 ( $J_{C-F}$  = 19.8 Hz), 40.87, 37.87, 34.65, 33.13, 31.88;  $^{19}\text{F}$  NMR (376 MHz,  $\text{CDCl}_3$ )  $\delta$  -223.17.  $^1\text{H}$  and  $^{13}\text{C}$  NMR spectroscopic data for **19** were identical to that previously reported.<sup>3</sup>

#### 4-[(2-Hydroxyethoxy)methyl]benzonitrile (**21**)

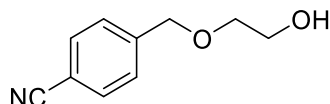

NaH (90% wt, 445 mg, 16.83 mmol, 1.10 equiv.) was suspended in dry THF (10 mL) and ethylene glycol (8.56 mL, 153.0 mmol, 10.00 equiv.) was added dropwise under argon at 0 °C. The solution was left for 30 min at 0 °C before dropwise addition of 4-(bromomethyl)benzonitrile (3000 mg, 15.30 mmol, 1.00 equiv.) in dry THF (30 mL) under argon at 0 °C. The reaction was slowly heated to room temperature and left for 3 hours. The reaction was quenched by adding EtOAc (50 mL) and the crude was washed with  $\text{NH}_4\text{Cl}$  saturated solution (50 mL x2) and water (50 mL). The organic phase was dried over  $\text{Na}_2\text{SO}_4$ , filtered and concentrated under reduced pressure. Purification by flash chromatography (n-heptane/EtOAc, 40:60) yielded 4-[(2-hydroxyethoxy)methyl]benzonitrile (2662 mg, 15.02 mmol, 98%) as a colorless liquid.  $^1\text{H}$  NMR (600 MHz,  $\text{CDCl}_3$ )  $\delta$  7.67 – 7.62 (m, 2H), 7.48 – 7.42 (m, 2H), 4.62 (s, 2H), 3.82 – 3.77 (m, 2H), 3.66 – 3.61 (m, 2H);  $^{13}\text{C}$  NMR (151 MHz,  $\text{CDCl}_3$ )  $\delta$  143.71, 132.42, 127.91, 118.89, 111.62, 72.40, 72.09, 62.00. HRMS (MALDI-TOF) calculated for  $\text{C}_{10}\text{H}_{11}\text{NO}_2$   $[\text{M}+\text{Na}]^+$ : 200.0682, found: 200.0687.

#### 4-[(2-Hydroxyethoxy)methyl]-1,2,4,5-tetrazin-3-yl}benzene (**22**)

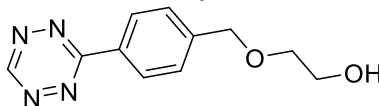

4-[(2-Hydroxyethoxy)methyl]benzonitrile (250 mg, 1.41 mmol, 1.00 equiv.),  $\text{CH}_2\text{Cl}_2$  (0.109 mL, 1.69 mmol, 1.20 equiv.), sulfur (91 mg, 0.35 mmol, 0.25 equiv.) and ethanol (3.0 mL) were mixed together in a microwave reaction vial. Hydrazine monohydrate (0.550 mL, 14.11 mmol, 10.00 equiv.) was added dropwise with stirring. The vessel was sealed, and the reaction mixture was heated at 50 °C for 24 hours. The reaction was diluted with 3 mL of  $\text{CH}_2\text{Cl}_2$  and sodium nitrite (974 mg, 14.11 mmol, 10.00 equiv.) in 20 mL of  $\text{H}_2\text{O}$  was added dropwise to the mixture under cooling. Excess acetic acid (2.5 mL) was then added slowly during which the solution turned bright red in color. The reaction mixture was extracted with  $\text{CH}_2\text{Cl}_2$  (3 x 100 mL). The organic phase was dried over  $\text{MgSO}_4$ , filtered and concentrated under reduced pressure. The resulting residue was purified using flash chromatography (n-heptane/EtOAc, 60:40) and recrystallized from n-heptane/EtOAc to give 4-[(2-hydroxyethoxy)methyl]-1,2,4,5-tetrazin-3-yl}benzene (204 mg, 0.88 mmol, 62%) as a pink solid.  $^1\text{H}$  NMR (600 MHz,  $\text{CDCl}_3$ )  $\delta$  10.21 (s, 1H), 8.64 – 8.59 (m, 2H), 7.58 (d,  $J$  = 8.1 Hz, 2H), 4.70 (s, 2H), 3.85 – 3.80 (m, 2H), 3.70 – 3.66 (m, 2H),  $^{13}\text{C}$  NMR (151 MHz,  $\text{CDCl}_3$ )  $\delta$  166.48, 157.95, 143.81, 131.10, 128.62, 128.38, 72.79, 71.99, 62.09; HRMS (MALDI-TOF) calculated for (*in situ* reduced to dihydro tetrazine)  $\text{C}_{11}\text{H}_{14}\text{N}_4\text{O}_2$   $[\text{M}+\text{H}]^+$ : 235.1189, found: 235.1192; Mp: 98-100 °C.

#### 4-[[2-(2-Fluoroethoxy)methyl]-1,2,4,5-tetrazin-3-yl]benzene (23)

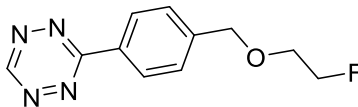

4-[[2-(2-Hydroxyethoxy)methyl]-1,2,4,5-tetrazin-3-yl]benzene (30 mg, 0.13 mmol, 1.00 equiv.) was dissolved in 3 mL of dry THF and PBSF (78 mL, 0.26 mmol, 2.00 equiv.) and DIPEA (135  $\mu$ L, 0.78 mmol, 6.00 equiv.) were added. Et<sub>3</sub>N\*3HF (42  $\mu$ L, 0.26 mmol, 2.00 equiv.) was dissolved in 1 mL of THF and added dropwise. The reaction was left at room temperature for 18 hours. The reaction was diluted with 10 mL CH<sub>2</sub>Cl<sub>2</sub> and washed with sat. NH<sub>4</sub>Cl (20 mL). The aqueous phase was extracted with CH<sub>2</sub>Cl<sub>2</sub> (2 x 10 mL) and the combined organic layers were dried over MgSO<sub>4</sub>, filtered and concentrated under reduced pressure. Purification by flash chromatography (n-heptane/EtOAc, 50:50) yielded 4-[[2-(2-fluoroethoxy)methyl]-1,2,4,5-tetrazin-3-yl]benzene (4 mg, 0.02 mmol, 13%) as a pink solid as well as recovered starting material (4 mg, 0.02 mmol). <sup>1</sup>H NMR (400 MHz, CDCl<sub>3</sub>)  $\delta$  10.21 (s, 1H), 8.68 – 8.57 (m, 2H), 7.60 (d, *J* = 8.1 Hz, 2H), 4.77 – 4.67 (m, 3H), 4.62 – 4.55 (m, 1H), 3.89 – 3.83 (m, 1H), 3.80 – 3.75 (m, 1H); <sup>19</sup>F NMR (376 MHz, CDCl<sub>3</sub>)  $\delta$  -222.93; <sup>13</sup>C NMR (101 MHz, CDCl<sub>3</sub>)  $\delta$  166.51, 157.96, 143.70, 131.10, 128.62, 128.34, 127.86, 83.25 (*J*<sub>C-F</sub> = 169.6 Hz), 72.89, 69.88 (*J*<sub>C-F</sub> = 19.7 Hz). HRMS (MALDI-TOF) calculated for C<sub>11</sub>H<sub>11</sub>FN<sub>4</sub>O [M+H]<sup>+</sup>: 235.0989, found: 235.0995; Mp: 55-57 °C.

#### 4-[[2-[[2-[(Methane)sulfonyl]oxy]ethoxy]methyl]-1,2,4,5-tetrazin-3-yl]benzene (24)

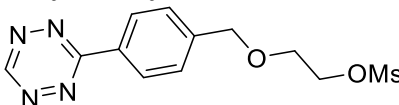

4-[[2-(2-Hydroxyethoxy)methyl]-1,2,4,5-tetrazin-3-yl]benzene (50 mg, 0.22 mmol, 1.00 equiv.) was mixed with methanesulfonyl chloride (50  $\mu$ L, 0.65 mmol, 3.00 equiv.) and dissolved in 4 mL of dry CH<sub>2</sub>Cl<sub>2</sub> under argon. A mixture of DIPEA (150  $\mu$ L, 0.86 mmol, 4 equiv.) and DMAP (5 mg, 0.04 mmol, cat.) in 1 mL dry CH<sub>2</sub>Cl<sub>2</sub> was added at 0 °C under argon. The reaction was allowed to reach room temperature and left stirring for additional 1.5 hours. The reaction was diluted with 10 mL of CH<sub>2</sub>Cl<sub>2</sub> and washed with sat. NH<sub>4</sub>Cl (20 mL) and H<sub>2</sub>O (2 x 20 mL). The organic phase was dried over Na<sub>2</sub>SO<sub>4</sub>, filtered and concentrated under reduced pressure. Purification by flash chromatography (n-heptane/EtOAc, 70:30) yielded 4-[[2-[[2-[(methane)sulfonyl]oxy]ethoxy]methyl]-1,2,4,5-tetrazin-3-yl]benzene (56 mg, 0.18 mmol, 84%) as a pink liquid that solidified over time. <sup>1</sup>H NMR (600 MHz, CDCl<sub>3</sub>)  $\delta$  10.22 (s, 1H), 8.65 – 8.60 (m, 2H), 7.58 (d, *J* = 8.3 Hz, 2H), 4.71 (s, 2H), 4.47 – 4.42 (m, 2H), 3.85 – 3.81 (m, 2H), 3.06 (s, 3H); <sup>13</sup>C NMR (151 MHz, CDCl<sub>3</sub>)  $\delta$  166.43, 157.98, 143.16, 131.29, 128.66, 128.38, 72.87, 68.97, 68.50, 37.88; HRMS (MALDI-TOF) calculated for C<sub>12</sub>H<sub>14</sub>N<sub>4</sub>O<sub>4</sub>S [M+Na]<sup>+</sup>: 333.0628, found: 333.0627; Mp: 96-98 °C.

#### 4-[[2-[[2-[(Toluene)sulfonyl]oxy]ethoxy]methyl]-1,2,4,5-tetrazin-3-yl]benzene (25)

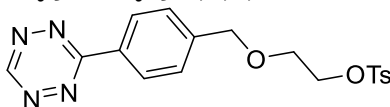

4-[[2-(2-Hydroxyethoxy)methyl]-1,2,4,5-tetrazin-3-yl]benzene (50 mg, 0.22 mmol, 1.00 equiv.) was mixed with tosyl chloride (123 mg, 0.65 mmol, 3.00 equiv.) and dissolved in 4 mL dry CH<sub>2</sub>Cl<sub>2</sub> under

argon. A mixture of DIPEA (150  $\mu$ L, 0.86 mmol, 4 equiv.) and DMAP (5 mg, 0.04 mmol, cat.) in 1 mL dry  $\text{CH}_2\text{Cl}_2$  was added at 0  $^\circ\text{C}$  under argon. The reaction was allowed to reach room temperature and left stirring for additional 20 hours. The reaction was diluted with 10 mL  $\text{CH}_2\text{Cl}_2$  and washed with sat.  $\text{NH}_4\text{Cl}$  (20 mL) and  $\text{H}_2\text{O}$  (2 x 20 mL). The organic phase was dried over  $\text{N}_2\text{SO}_4$  and concentrated under reduced pressure. Purification by flash chromatography (n-heptane/EtOAc, 70:30) 4-{{2-{{[(toluene)sulfonyl]oxy}ethoxy}methyl]-1,2,4,5-tetrazin-3-yl}benzene (31 mg, 0.08 mmol, 37%) as a pink solid.  $^1\text{H}$  NMR (600 MHz,  $\text{CDCl}_3$ )  $\delta$  10.22 (d,  $J$  = 1.1 Hz, 1H), 8.61 – 8.57 (m, 2H), 7.84 – 7.80 (m, 2H), 7.52 – 7.48 (m, 2H), 7.35 – 7.31 (m, 2H), 4.62 (s, 2H), 4.28 – 4.23 (m, 2H), 3.78 – 3.73 (m, 2H), 2.44 (s, 3H);  $^{13}\text{C}$  NMR (151 MHz,  $\text{CDCl}_3$ )  $\delta$  166.47, 157.97, 145.04, 143.41, 133.19, 131.10, 130.00, 128.55, 128.21, 128.14, 72.73, 69.30, 68.22, 21.81; HRMS (MALDI-TOF) calculated for  $\text{C}_{18}\text{H}_{18}\text{N}_4\text{O}_4\text{S}$   $[\text{M}+\text{Na}]^+$ : 409.0941, found: 409.0941; Mp: 100-102 $^\circ\text{C}$ .

#### 4-{{2-{{[(4-Nitrobenzene)sulfonyl]oxy}ethoxy}methyl]-1,2,4,5-tetrazin-3-yl}benzene (26)

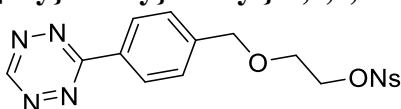

4-{{2-{{[(2-Hydroxyethoxy)methyl]-1,2,4,5-tetrazin-3-yl}benzene (50 mg, 0.22 mmol, 1.00 equiv.) was mixed with nitrobenzenesulfonyl chloride (143 mg, 0.65 mmol, 3.00 equiv.) and dissolved in 4 mL dry  $\text{CH}_2\text{Cl}_2$  under argon. A mixture of DIPEA (150  $\mu$ L, 0.86 mmol, 4 equiv.) and DMAP (5 mg, 0.04 mmol, cat.) in 1 mL dry  $\text{CH}_2\text{Cl}_2$  was added at 0  $^\circ\text{C}$  under argon. The reaction was allowed to reach room temperature and left stirring for additional 3 hours. The reaction was diluted with 10 mL  $\text{CH}_2\text{Cl}_2$  and washed with sat.  $\text{NH}_4\text{Cl}$  (20 mL) and  $\text{H}_2\text{O}$  (2 x 20 mL). The organic phase was dried over  $\text{N}_2\text{SO}_4$ , filtered and concentrated under reduced pressure. Purification by flash chromatography (n-heptane/EtOAc, 60:40) yielded 4-{{2-{{[(4-nitrobenzene)sulfonyl]oxy}ethoxy}-methyl]-1,2,4,5-tetrazin-3-yl}benzene (83 mg, 0.20 mmol, 92%) as a pink solid.  $^1\text{H}$  NMR (600 MHz,  $\text{CDCl}_3$ )  $\delta$  10.24 (s, 1H), 8.61 – 8.57 (m, 2H), 8.32 – 8.28 (m, 2H), 8.12 – 8.08 (m, 2H), 7.46 (dd,  $J$  = 7.4, 1.1 Hz, 2H), 4.58 (s, 2H), 4.41 – 4.37 (m, 2H), 3.79 – 3.75 (m, 2H);  $^{13}\text{C}$  NMR (151 MHz,  $\text{CDCl}_3$ ):  $\delta$  166.34, 158.01, 150.80, 142.86, 142.05, 131.39, 129.38, 128.57, 128.32, 124.45, 72.83, 70.58, 68.04.; HRMS (MALDI-TOF) calculated for  $\text{C}_{17}\text{H}_{15}\text{N}_5\text{O}_6\text{S}$   $[\text{M}+\text{Na}]^+$ : 440.0635, found: 440.0636; Mp: 126-128  $^\circ\text{C}$ .

#### 2-Fluoro-4-(1,2,4,5-tetrazin-3-yl)benzoic acid (28)

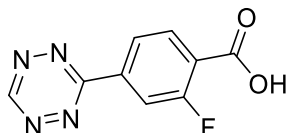

2-Fluoro-4-cyanobenzoic acid (0.99 g, 6.00 mmol, 1 equiv.),  $\text{CH}_2\text{Cl}_2$  (6.00 mmol, 0.385 mL, 1 equiv.), sulfur (0.385 g, 1.50 mmol, 0.25 equiv.) and ethanol (6.0 mL) were mixed together in 3 x 20 mL microwave reaction tubes. Hydrazine monohydrate (2.34 mL, 48.00 mmol, 8 equiv.) was added slowly under stirring. The vessel was sealed, and the reaction mixture was heated to 50  $^\circ\text{C}$  for 24 hours.  $\text{CH}_2\text{Cl}_2$  (3 mL) and sodium nitrite (4.14 g, 60.00 mmol, 10 equiv.) in 60 mL of  $\text{H}_2\text{O}$  were added to the mixture. Excess acetic acid (21 mL) was then added slowly and the solution turned bright red in color. The reaction mixture was extracted with  $\text{CH}_2\text{Cl}_2$  (3 x 20 mL). The organic phase was dried over  $\text{MgSO}_4$ ,

filtered and concentrated under reduced pressure. The resulting residue was purified using flash chromatography (30/70 n-heptane/EtOAc) to afford 2-fluoro-4-(1,2,4,5-tetrazin-3-yl)benzoic acid as a pink solid.  $^1\text{H-NMR}$  (MeOD, 600 MHz): 10.44 (s, 1H), 8.50 (dd,  $J = 1.6, 8.1$  Hz), 8.40 (dd,  $J = 1.6, 11.5$  Hz, 1H), 8.20 (t,  $J = 7.74$  Hz, 1H);  $^{19}\text{F NMR}$  (376 MHz, MeOD)  $\delta$  -110.27;  $^{13}\text{C NMR}$  (151 MHz, MeOD)  $\delta$  165.11 ( $J_{\text{C-F}} = 3.3$  Hz), 165.04 ( $J_{\text{C-F}} = 2.7$  Hz), 162.10 ( $J_{\text{C-F}} = 259.0$  Hz), 158.24 ( $J_{\text{C-F}} = 10.2$  Hz), 137.97 ( $J_{\text{C-F}} = 8.8$  Hz), 132.85 ( $J_{\text{C-F}} = 1.2$  Hz), 123.10 ( $J_{\text{C-F}} = 4.0$  Hz), 122.84 ( $J_{\text{C-F}} = 10.7$  Hz), 115.83 ( $J_{\text{C-F}} = 25.7$  Hz); HRMS (MALDI-TOF) calculated for  $\text{C}_9\text{H}_5\text{FN}_4\text{O}_2$   $[\text{M-H}]^-$ : 219.0323, found: 219.0318; Mp: 227-229 °C.

### 2-Fluoro-4-(1,2,4,5-tetrazin-3-yl)-2-fluoroethyl-benzoate (29)

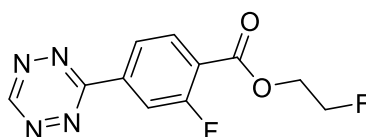

2-Fluoro-4-(1,2,4,5-tetrazin-3-yl)benzoic acid (10 mg, 0.05 mmol, 1.00 equiv.) and 2-fluoroethyl 4-methylbenzenesulfonate (30 mg, 0.14 mmol, 3.00 equiv.) were dissolved in 2 mL dry DMF and DIPEA (20  $\mu\text{L}$ , 0.10 mmol, 2.00 equiv.) was added. The reaction was left at 100 °C overnight. The reaction was diluted with  $\text{Et}_2\text{O}$  (15 mL) and washed with sat.  $\text{NH}_4\text{Cl}$  (20 mL) and  $\text{H}_2\text{O}$  (2 x 10 mL). The organic phase was dried over  $\text{MgSO}_4$ , filtered and concentrated under reduced pressure. Purification by flash chromatography (toluene) yielded 2-Fluoro-4-(1,2,4,5-tetrazin-3-yl)-2-fluoroethyl-benzoate (6.5 mg, 0.02 mmol, 45%) as a pink liquid that solidified over time.  $^1\text{H NMR}$  (400 MHz,  $\text{CDCl}_3$ )  $\delta$  10.31 (s, 1H), 8.51 (dd,  $J = 8.2, 1.6$  Hz, 1H), 8.45 (dd,  $J = 11.2, 1.6$  Hz, 1H), 8.21 (dd,  $J = 8.2, 7.1$  Hz, 1H), 4.88 – 4.79 (m, 1H), 4.77 – 4.65 (m, 2H), 4.65 – 4.57 (m, 1H);  $^{13}\text{C NMR}$  (101 MHz,  $\text{CDCl}_3$ )  $\delta$  165.23, 163.49, 162.49 ( $J_{\text{C-F}} = 262.2$  Hz), 158.34, 137.83, 133.38, 123.67 ( $J_{\text{C-F}} = 4.1$  Hz), 122.26, 116.96 ( $J_{\text{C-F}} = 25.5$  Hz), 81.23 ( $J_{\text{C-F}} = 171.3$  Hz), 64.65 ( $J_{\text{C-F}} = 20.4$  Hz);  $^{19}\text{F NMR}$  (376 MHz,  $\text{CDCl}_3$ )  $\delta$  -106.87, -224.63; HRMS (MALDI-TOF) calculated for (*in situ* reduced to dihydro tetrazine)  $\text{C}_{11}\text{H}_{10}\text{F}_2\text{N}_4\text{O}_2$   $[\text{M+H}]^+$ : 269.0844, found: 269.0848; Mp: 96-98 °C.

### 2-Fluoro-4-(1,2,4,5-tetrazin-3-yl)-2-hydroxyethyl-benzoate (30)

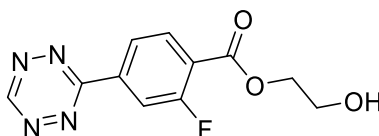

2-Fluoro-4-(1,2,4,5-tetrazin-3-yl)benzoic acid (0.07 g, 0.32 mmol, 1.00 equiv.) and 2-bromoethanol (0.07 mL, 0.97 mmol, 3.00 equiv.) were dissolved in 3 mL of dry DMF. DIPEA (0.17 mL, 0.97 mmol, 3.00 equiv.) was dissolved in 1 mL DMF and added dropwise and the reaction was left at 70 °C. After the reaction was completed, it was cooled down, diluted with water (30 mL) and extracted with  $\text{CH}_2\text{Cl}_2$  (2 x 20 mL). The organic phase was dried over  $\text{MgSO}_4$ , filtered, and concentrated under reduced pressure. The crude was purified by flash chromatography (60/40 n-heptane/EtOAc) to give 2-fluoro-4-(1,2,4,5-tetrazin-3-yl)-2-hydroxyethyl-benzoate (35 mg, 41%) as a red solid.  $^1\text{H NMR}$  (400 MHz,  $\text{CDCl}_3$ )  $\delta$  10.30 (s, 1H), 8.46 (dd,  $J = 8.3, 1.7$  Hz, 1H), 8.38 (dd,  $J = 11.3, 1.7$  Hz, 1H), 8.16 (t,  $J = 7.7$  Hz, 1H), 4.58 –

4.45 (m, 2H), 3.99 (t,  $J = 4.7$  Hz, 2H);  $^{13}\text{C}$  NMR (101 MHz,  $\text{CDCl}_3$ )  $\delta$  164.99 ( $J_{\text{C-F}} = 2.7$  Hz), 163.84 ( $J_{\text{C-F}} = 3.9$  Hz), 162.12 ( $J_{\text{C-F}} = 261.1$  Hz), 158.14, 137.51 ( $J_{\text{C-F}} = 9.0$  Hz), 133.24, 123.52 ( $J_{\text{C-F}} = 4.0$  Hz), 122.35 ( $J_{\text{C-F}} = 10.5$  Hz), 116.70 ( $J_{\text{C-F}} = 25.7$  Hz), 67.31, 60.98; HRMS (MALDI-TOF) calculated for  $\text{C}_{11}\text{H}_9\text{FN}_4\text{O}_3$   $[\text{M}+\text{H}]^+$ : 266.0615, found: 266.0617; Mp: 101-103 °C.

### 2-Fluoro-4-(1,2,4,5-tetrazin-3-yl)- 2-[[{(tolouene)sulfonyl]oxy}ethyl -benzoate (31)

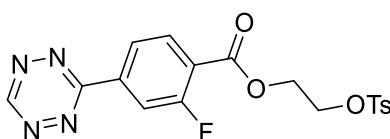

2-Fluoro-4-(1,2,4,5-tetrazin-3-yl)benzoic acid (300 mg, 1.36 mmol, 1.00 equiv) and ethylene di(*p*-toluenesulfonate) (1514 mg, 4.09 mmol, 3.00 equiv.) were dissolved in 30 mL of dry DMF. DIPEA (0.340 mL, 2.18 mmol, 1.60 equiv.) was dissolved in 4 mL of dry DMF and added dropwise to the reaction which was left at 100 °C for 3 hours. The crude was diluted with  $\text{Et}_2\text{O}$  (30 mL) and washed with sat.  $\text{NH}_4\text{Cl}$  (20 mL) and  $\text{H}_2\text{O}$  (2 x 30 mL). The organic phase was dried over  $\text{MgSO}_4$ , filtered and concentrated under reduced pressure. Purification by flash chromatography (toluene/ $\text{EtOAc}$ , 95:5) yielded 2-fluoro-4-(1,2,4,5-tetrazin-3-yl)- 2-[[{(tolouene)-sulfonyl]oxy}ethyl-benzoate (242 mg, 0.58 mmol, 42%) as a pink liquid that solidified over time.  $^1\text{H}$  NMR (600 MHz,  $\text{CDCl}_3$ )  $\delta$  10.32 (d,  $J = 1.5$  Hz, 1H), 8.52 – 8.46 (m, 1H), 8.42 (dt,  $J = 11.2, 1.6$  Hz, 1H), 8.10 (td,  $J = 7.8, 7.2, 1.5$  Hz, 1H), 7.81 (dd,  $J = 8.3, 1.7$  Hz, 2H), 7.32 (d,  $J = 7.9$  Hz, 2H), 4.59 – 4.54 (m, 2H), 4.42 – 4.36 (m, 2H), 2.41 (s, 3H);  $^{19}\text{F}$  NMR (376 MHz,  $\text{CDCl}_3$ )  $\delta$  -106.68;  $^{13}\text{C}$  NMR (151 MHz,  $\text{CDCl}_3$ )  $\delta$  165.16 ( $J_{\text{C-F}} = 2.7$  Hz), 163.07 ( $J_{\text{C-F}} = 3.9$  Hz), 162.44 ( $J_{\text{C-F}} = 262.6$  Hz), 158.34 ( $J_{\text{C-F}} = 2.5$  Hz), 145.24, 137.85 ( $J_{\text{C-F}} = 9.0$  Hz), 133.39, 132.90, 130.07, 128.10, 123.61 ( $J_{\text{C-F}} = 3.9$  Hz), 121.93 ( $J_{\text{C-F}} = 9.9$  Hz), 116.86 ( $J_{\text{C-F}} = 25.3$  Hz), 67.44, 62.90, 21.79; HRMS (MALDI-TOF) calculated for (*in situ* reduced to dihydro tetrazine):  $\text{C}_{18}\text{H}_{18}\text{FN}_4\text{O}_5\text{S}$   $[\text{M}+\text{H}]^+$ : 421.0982, found: 421.0970; Mp: 104-106 °C.

### 2-Fluoro-4-(1,2,4,5-tetrazin-3-yl)- 2-[[{(4-nitrobenzene)sulfonyl]oxy}ethyl -benzoate (32)

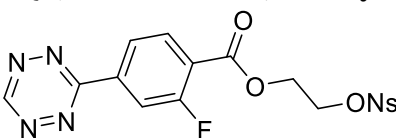

To a solution of 2-fluoro-4-(1,2,4,5-tetrazin-3-yl)-2-hydroxyethyl-benzoate (0.05 g, 0.10 mmol) and DIPEA (0.07 mL, 0.43 mmol) in  $\text{CH}_2\text{Cl}_2$  (20 mL) nosyl chloride (0.072 g, 0.32 mmol) and DMAP (0.002 g, 0.02 mmol) were added. The reaction was stirred at room temperature for 4 hours. The volatiles were removed under reduced pressure. Purification by flash chromatography (75/25 *n*-heptane/ $\text{EtOAc}$ ) yielded semi-pure product (60 mg) as a red solid. Recrystallization from  $\text{EtOAc}/n$ -heptane afforded 2-fluoro-4-(1,2,4,5-tetrazin-3-yl)- 2-[[{(4-nitrobenzene)sulfonyl]oxy}ethyl -benzoate (35 mg, 0.078 mmol, 35%) as a red solid.  $^1\text{H}$  NMR (600 MHz,  $\text{DMSO}-d_6$ )  $\delta$  10.73 (s, 1H), 8.43 (dd,  $J = 8.2, 1.7$  Hz, 1H), 8.40 – 8.36 (m, 2H), 8.34 (dd,  $J = 11.5, 1.6$  Hz, 1H), 8.22 – 8.18 (m, 2H), 8.03 (t,  $J = 7.8$  Hz, 1H), 4.59 – 4.54 (m, 4H);  $^{13}\text{C}$  NMR (151 MHz,  $\text{DMSO}$ )  $\delta$  164.58, 162.73 ( $J_{\text{C-F}} = 3.5$  Hz), 160.72, 158.96, 150.98, 140.99, 138.80 ( $J_{\text{C-F}} = 8.9$  Hz), 133.39, 129.82, 125.35, 124.08 ( $J_{\text{C-F}} = 3.8$  Hz), 121.34 ( $J_{\text{C-F}} = 10.5$  Hz), 116.38 ( $J_{\text{C-F}} = 24.7$  Hz), 70.38, 63.21;  $^{19}\text{F}$  NMR (376 MHz,  $\text{DMSO}-d_6$ )  $\delta$  -108.44; HRMS (MALDI-TOF) calculated for  $\text{C}_{17}\text{H}_{12}\text{FN}_5\text{O}_7\text{S}$   $[\text{M}+\text{H}]^+$ : 450.0514, found: 450.0515; Mp: 103-105 °C.

## Radiochemistry general

[<sup>18</sup>F]Fluoride was produced by proton irradiation of [<sup>18</sup>O]H<sub>2</sub>O via a (p,n) reaction using a cyclotron (CTI Siemens Eclipse or Scanditronix MC32). Samples were analyzed by analytical HPLC (Thermo Fisher® UltiMate 3000) with a C-18 column (Luna® 5u C18(2) 100Å, 150 x 4.6 mm). Eluents: A: H<sub>2</sub>O with 0.1% TFA, B: MeCN with 0.1% TFA. Gradient from 100% A → 100% B over 15 minutes, back to 100% A over 4 minutes, flow rate 1.5 mL/min. Detection by UV-absorption at λ = 254 nm on a UVD 170U detector if nothing else stated, radioactivity was analyzed using a flow-through GM tube based radiodetector (Scansys). Radio TLC was performed on silica gel 60 F<sub>254</sub> (Merck), radioactivity was detected using photostimulated luminescence plates (PSP) (Perkin Elmer) by incubating the TLC-plates on the PSP for 5 min. PSP were read in a cyclone reader (Cyclone Plus Phosphor Imager, PerkinElmer, Inc.) and analyzed using Optiquant. Automated synthesis was performed on a Scansys Laboratorieteknik synthesis module with purification by semipreparative HPLC using a C-18 column (Luna® 5µm C18(2) 100Å, 250 x 10 mm). SPE purification was carried out on C18 cartridges (Sep-Pak C18 Plus Short types) preconditioned by rinsing with EtOH (10 mL) followed by H<sub>2</sub>O (10 mL) and then dried with air. Anion exchange cartridge (Sep-Pak® Light QMA cartridge 130 mg sorbent, chloride as counter ion) were prepared by flushing with EtOH (2 mL) followed by a solution of the appropriate preconditioning anion (0.5 M solution, 10 mL). The cartridge was then washed with H<sub>2</sub>O (10 mL) and dried with air.

## General method for elution experiments

[<sup>18</sup>F]fluoride was delivered from the cyclotron and received in a 10 mL glass vial. Activity concentration was adjusted to 100-300 MBq/mL by diluting with milliQ water. The [<sup>18</sup>F]Fluoride solution was applied to the cartridge (0.2-2 mL, 20-100 MBq) using a 1 mL syringe followed by flushing the cartridge with air and activity stuck to the cartridge was measured using a dose calibrator. The cartridge was then eluted in the same direction using 1 mL of the eluting anion solution. The cartridge was flushed with air and activity was measured of both the eluted cartridge and the collected eluate. [<sup>18</sup>F]Fluoride recovery was calculated as the decay corrected activity difference between the cartridge before elution and the vial with the eluate. The results from the different elution experiments are presented in *Table S1*. Obtained experimental elution curves (% eluted [<sup>18</sup>F]fluoride plotted against eluting base concentration) were fitted to the Hill equation:

$$\%EL = 100\% \times \frac{C_b^n}{C_b^n + dc50^n},$$

where  $C_b$  is the concentration of the eluting base in mmol/L, %EL is the experimentally determined [<sup>18</sup>F]fluoride elution efficiency, dc50 is the eluting base concentration leading to 50% elution efficiency, and  $n$  is the Hill slope coefficient. The concentration of the base leading to 90% elution efficiency (dc90) was then calculated from the dc50 value using the following formula:

$$dc90 = dc50 \times \sqrt[n]{9}$$

## General method for manual radiolabeling experiments

[<sup>18</sup>F]Fluoride solution was prepared in the same manner as for the elution experiments. Anion exchange cartridge was eluted into a 4 mL V-shaped glass vial, for the cases where kryptands or crown ethers were added, 1.3 equivalents were used to the eluting anion concentration. The vial was placed in a heating

block and heated to 100 °C under a stream of nitrogen for 10 min to remove the eluting solvent. Azeotropic drying by MeCN added 2x0.5 mL followed by 5 min drying at 100 °C under a stream of nitrogen. The activity of the dried fluoride was measured in a dose calibrator to determine if any fluoride was lost during the drying process. In case of elution by methanolic solutions, the cartridge was flushed with air (10 mL syringe) before elution, to remove residual water. The drying was then conducted at 100 °C under nitrogen flow for 5 minutes without addition of MeCN.

Precursor dissolved in the reaction solvent was added to the dried [<sup>18</sup>F]fluoride and the cap of the reaction vial was switched to a new one. The reaction vial was placed back in the heating block at the desired reaction temperature. When the reaction was finished the reaction vial was removed from the heating block and was allowed to cool down for 1 min. The activity of the reaction vial was measured in a dose calibrator, the reaction solution was moved to a new vial containing 0.3 mL of H<sub>2</sub>O to quench the reaction using a 1 mL syringe. To dissolve any residual [<sup>18</sup>F]fluoride stuck to the glass wall, 0.3 mL H<sub>2</sub>O was added to the empty reaction vial and it was shaken gently. The activity of both vials were measured in a dose calibrator to determine how much activity was in solution by the end of the reaction. An analytical sample (0.1 mL) was taken from the quenched reaction (crude RCC). The quenched reaction mixture was then moved back to the original reaction vial using the same syringe, the solution was mixed, and another analytical sample was taken (0.1 mL) (resolubilized RCC). The samples were analyzed by analytical HPLC (for identification) and TLC (for quantification). Region for the desired product was integrated as well as free [<sup>18</sup>F]fluoride (base line, rf: 0) for quantification. Results were given as percent of activity of the integrated region versus the activity of total lane. This did not require for all potential byproducts to be integrated however this resulted in a slightly lower percentage of the integrated product resulting in lower pRCY as it did not account for the lane background not containing any radioactive species.

The workflow for aliphatic radiolabeling experiments can be seen in *Figure S2*.

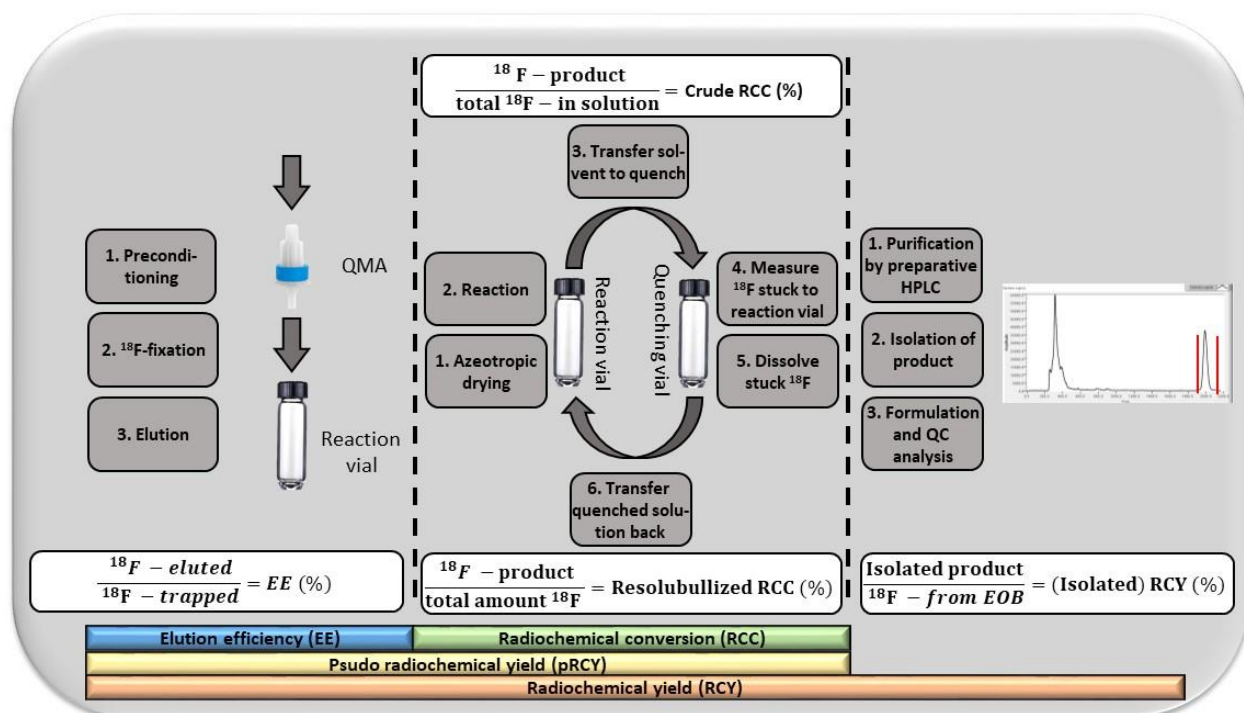

**Figure S2.** Workflow for elution, reaction and purification of aliphatic  $^{18}\text{F}$ -fluorination reactions. For automated synthesis to determine isolated RCY the elution and reaction part was performed automated and the EE and pRCY was not determined.

## Results from initial screening of anion exchange cartridge

Experiments conducted according to the general method for elution experiments, results displayed in *Table S1*.

**Table S1** Results from the elution experiments with different concentrations of bases for various preconditioning anions, cartridges and solvents.

| Exp id | Cartridge | Preconditioning anion | Eluting base                           | Eluting concentration | Co-solvent | % co-solvent | % eluted |
|--------|-----------|-----------------------|----------------------------------------|-----------------------|------------|--------------|----------|
| 1      | QMA       | $\text{Cl}^-$         | $\text{K}_2\text{CO}_3/\text{K}_{222}$ | 100                   | MeCN       | 90           | 98       |
| 2      | QMA       | $\text{Cl}^-$         | $\text{K}_2\text{CO}_3/\text{K}_{222}$ | 75                    | MeCN       | 90           | 98       |
| 3      | QMA       | $\text{Cl}^-$         | $\text{K}_2\text{CO}_3/\text{K}_{222}$ | 50                    | MeCN       | 90           | 94       |
| 4      | QMA       | $\text{Cl}^-$         | $\text{K}_2\text{CO}_3/\text{K}_{222}$ | 33                    | MeCN       | 90           | 68       |
| 5      | QMA       | $\text{Cl}^-$         | $\text{K}_2\text{CO}_3/\text{K}_{222}$ | 25                    | MeCN       | 90           | 53       |
| 6      | QMA       | $\text{Cl}^-$         | $\text{K}_2\text{CO}_3/\text{K}_{222}$ | 10                    | MeCN       | 90           | 3        |
| 7      | QMA       | $\text{Cl}^-$         | $\text{K}_2\text{CO}_3/\text{K}_{222}$ | 5                     | MeCN       | 90           | 1        |
| 8      | QMA       | $\text{HCO}_3^-$      | $\text{K}_2\text{CO}_3/\text{K}_{222}$ | 100                   | MeCN       | 90           | 98       |
| 9      | QMA       | $\text{HCO}_3^-$      | $\text{K}_2\text{CO}_3/\text{K}_{222}$ | 75                    | MeCN       | 90           | 97       |
| 10     | QMA       | $\text{HCO}_3^-$      | $\text{K}_2\text{CO}_3/\text{K}_{222}$ | 50                    | MeCN       | 90           | 95       |
| 11     | QMA       | $\text{HCO}_3^-$      | $\text{K}_2\text{CO}_3/\text{K}_{222}$ | 33                    | MeCN       | 90           | 87       |
| 12     | QMA       | $\text{HCO}_3^-$      | $\text{K}_2\text{CO}_3/\text{K}_{222}$ | 25                    | MeCN       | 90           | 82       |
| 13     | QMA       | $\text{HCO}_3^-$      | $\text{K}_2\text{CO}_3/\text{K}_{222}$ | 10                    | MeCN       | 90           | 43       |
| 14     | QMA       | $\text{HCO}_3^-$      | $\text{K}_2\text{CO}_3/\text{K}_{222}$ | 5                     | MeCN       | 90           | 11       |
| 15     | QMA       | $\text{HCO}_3^-$      | $\text{K}_2\text{CO}_3/\text{K}_{222}$ | 100                   | none       | 0            | 99       |
| 16     | QMA       | $\text{HCO}_3^-$      | $\text{K}_2\text{CO}_3/\text{K}_{222}$ | 75                    | none       | 0            | 99       |



|    |     |                               |                                                  |     |      |    |     |
|----|-----|-------------------------------|--------------------------------------------------|-----|------|----|-----|
| 17 | QMA | HCO <sub>3</sub> <sup>-</sup> | K <sub>2</sub> CO <sub>3</sub> /K <sub>222</sub> | 50  | none | 0  | 99  |
| 18 | QMA | HCO <sub>3</sub> <sup>-</sup> | K <sub>2</sub> CO <sub>3</sub> /K <sub>222</sub> | 33  | none | 0  | 98  |
| 19 | QMA | HCO <sub>3</sub> <sup>-</sup> | K <sub>2</sub> CO <sub>3</sub> /K <sub>222</sub> | 25  | none | 0  | 99  |
| 20 | QMA | HCO <sub>3</sub> <sup>-</sup> | K <sub>2</sub> CO <sub>3</sub> /K <sub>222</sub> | 10  | none | 0  | 78  |
| 21 | QMA | HCO <sub>3</sub> <sup>-</sup> | K <sub>2</sub> CO <sub>3</sub> /K <sub>222</sub> | 5   | none | 0  | 17  |
| 22 | QMA | Cl <sup>-</sup>               | K <sub>2</sub> CO <sub>3</sub> /K <sub>222</sub> | 100 | none | 0  | 94  |
| 23 | QMA | Cl <sup>-</sup>               | K <sub>2</sub> CO <sub>3</sub> /K <sub>222</sub> | 75  | none | 0  | 98  |
| 24 | QMA | Cl <sup>-</sup>               | K <sub>2</sub> CO <sub>3</sub> /K <sub>222</sub> | 50  | none | 0  | 98  |
| 25 | QMA | Cl <sup>-</sup>               | K <sub>2</sub> CO <sub>3</sub> /K <sub>222</sub> | 33  | none | 0  | 97  |
| 26 | QMA | Cl <sup>-</sup>               | K <sub>2</sub> CO <sub>3</sub> /K <sub>222</sub> | 25  | none | 0  | 97  |
| 27 | QMA | Cl <sup>-</sup>               | K <sub>2</sub> CO <sub>3</sub> /K <sub>222</sub> | 10  | none | 0  | 50  |
| 28 | QMA | Cl <sup>-</sup>               | K <sub>2</sub> CO <sub>3</sub> /K <sub>222</sub> | 5   | none | 0  | 2   |
| 29 | QMA | HCO <sub>3</sub> <sup>-</sup> | K <sub>2</sub> CO <sub>3</sub> /K <sub>222</sub> | 100 | MeCN | 50 | 98  |
| 30 | QMA | HCO <sub>3</sub> <sup>-</sup> | K <sub>2</sub> CO <sub>3</sub> /K <sub>222</sub> | 75  | MeCN | 50 | 99  |
| 31 | QMA | HCO <sub>3</sub> <sup>-</sup> | K <sub>2</sub> CO <sub>3</sub> /K <sub>222</sub> | 50  | MeCN | 50 | 99  |
| 32 | QMA | HCO <sub>3</sub> <sup>-</sup> | K <sub>2</sub> CO <sub>3</sub> /K <sub>222</sub> | 33  | MeCN | 50 | 99  |
| 33 | QMA | HCO <sub>3</sub> <sup>-</sup> | K <sub>2</sub> CO <sub>3</sub> /K <sub>222</sub> | 25  | MeCN | 50 | 99  |
| 34 | QMA | HCO <sub>3</sub> <sup>-</sup> | K <sub>2</sub> CO <sub>3</sub> /K <sub>222</sub> | 10  | MeCN | 50 | 95  |
| 35 | QMA | HCO <sub>3</sub> <sup>-</sup> | K <sub>2</sub> CO <sub>3</sub> /K <sub>222</sub> | 5   | MeCN | 50 | 57  |
| 36 | QMA | Cl <sup>-</sup>               | K <sub>2</sub> CO <sub>3</sub>                   | 50  | MeCN | 50 | 97  |
| 37 | QMA | Cl <sup>-</sup>               | K <sub>2</sub> CO <sub>3</sub>                   | 50  | MeCN | 10 | 98  |
| 38 | QMA | Cl <sup>-</sup>               | K <sub>2</sub> CO <sub>3</sub>                   | 50  | MeCN | 90 | 0   |
| 39 | QMA | Cl <sup>-</sup>               | KHCO <sub>3</sub> /K <sub>222</sub>              | 100 | MeCN | 90 | 89  |
| 40 | QMA | Cl <sup>-</sup>               | KHCO <sub>3</sub> /K <sub>222</sub>              | 75  | MeCN | 90 | 82  |
| 41 | QMA | Cl <sup>-</sup>               | KHCO <sub>3</sub> /K <sub>222</sub>              | 50  | MeCN | 90 | 70  |
| 42 | QMA | Cl <sup>-</sup>               | KHCO <sub>3</sub> /K <sub>222</sub>              | 33  | MeCN | 90 | 54  |
| 43 | QMA | Cl <sup>-</sup>               | KHCO <sub>3</sub> /K <sub>222</sub>              | 25  | MeCN | 90 | 25  |
| 44 | QMA | Cl <sup>-</sup>               | KHCO <sub>3</sub> /K <sub>222</sub>              | 10  | MeCN | 90 | 3   |
| 45 | QMA | Cl <sup>-</sup>               | KHCO <sub>3</sub> /K <sub>222</sub>              | 5   | MeCN | 90 | 0   |
| 46 | QMA | HCO <sub>3</sub> <sup>-</sup> | KHCO <sub>3</sub> /K <sub>222</sub>              | 100 | MeCN | 90 | 96  |
| 47 | QMA | HCO <sub>3</sub> <sup>-</sup> | KHCO <sub>3</sub> /K <sub>222</sub>              | 75  | MeCN | 90 | 90  |
| 48 | QMA | HCO <sub>3</sub> <sup>-</sup> | KHCO <sub>3</sub> /K <sub>222</sub>              | 50  | MeCN | 90 | 86  |
| 49 | QMA | HCO <sub>3</sub> <sup>-</sup> | KHCO <sub>3</sub> /K <sub>222</sub>              | 33  | MeCN | 90 | 78  |
| 50 | QMA | HCO <sub>3</sub> <sup>-</sup> | KHCO <sub>3</sub> /K <sub>222</sub>              | 25  | MeCN | 90 | 77  |
| 51 | QMA | HCO <sub>3</sub> <sup>-</sup> | KHCO <sub>3</sub> /K <sub>222</sub>              | 10  | MeCN | 90 | 33  |
| 52 | QMA | HCO <sub>3</sub> <sup>-</sup> | KHCO <sub>3</sub> /K <sub>222</sub>              | 5   | MeCN | 90 | 8   |
| 53 | QMA | HCO <sub>3</sub> <sup>-</sup> | KHCO <sub>3</sub> /K <sub>222</sub>              | 100 | none | 0  | 93  |
| 54 | QMA | HCO <sub>3</sub> <sup>-</sup> | KHCO <sub>3</sub> /K <sub>222</sub>              | 75  | none | 0  | 99  |
| 55 | QMA | HCO <sub>3</sub> <sup>-</sup> | KHCO <sub>3</sub> /K <sub>222</sub>              | 50  | none | 0  | 99  |
| 56 | QMA | HCO <sub>3</sub> <sup>-</sup> | KHCO <sub>3</sub> /K <sub>222</sub>              | 33  | none | 0  | 100 |
| 57 | QMA | HCO <sub>3</sub> <sup>-</sup> | KHCO <sub>3</sub> /K <sub>222</sub>              | 25  | none | 0  | 99  |
| 58 | QMA | HCO <sub>3</sub> <sup>-</sup> | KHCO <sub>3</sub> /K <sub>222</sub>              | 10  | none | 0  | 99  |
| 59 | QMA | HCO <sub>3</sub> <sup>-</sup> | KHCO <sub>3</sub> /K <sub>222</sub>              | 5   | none | 0  | 85  |
| 60 | QMA | Cl <sup>-</sup>               | KHCO <sub>3</sub> /K <sub>222</sub>              | 100 | none | 0  | 95  |
| 61 | QMA | Cl <sup>-</sup>               | KHCO <sub>3</sub> /K <sub>222</sub>              | 75  | none | 0  | 96  |
| 62 | QMA | Cl <sup>-</sup>               | KHCO <sub>3</sub> /K <sub>222</sub>              | 50  | none | 0  | 96  |
| 63 | QMA | Cl <sup>-</sup>               | KHCO <sub>3</sub> /K <sub>222</sub>              | 33  | none | 0  | 96  |
| 64 | QMA | Cl <sup>-</sup>               | KHCO <sub>3</sub> /K <sub>222</sub>              | 25  | none | 0  | 96  |
| 65 | QMA | Cl <sup>-</sup>               | KHCO <sub>3</sub> /K <sub>222</sub>              | 10  | none | 0  | 62  |
| 66 | QMA | Cl <sup>-</sup>               | KHCO <sub>3</sub> /K <sub>222</sub>              | 5   | none | 0  | 9   |
| 67 | QMA | HCO <sub>3</sub> <sup>-</sup> | KHCO <sub>3</sub> /K <sub>222</sub>              | 100 | MeCN | 50 | 99  |

|     |     |                               |                                     |     |      |    |    |
|-----|-----|-------------------------------|-------------------------------------|-----|------|----|----|
| 68  | QMA | HCO <sub>3</sub> <sup>-</sup> | KHCO <sub>3</sub> /K <sub>222</sub> | 75  | MeCN | 50 | 99 |
| 69  | QMA | HCO <sub>3</sub> <sup>-</sup> | KHCO <sub>3</sub> /K <sub>222</sub> | 50  | MeCN | 50 | 99 |
| 70  | QMA | HCO <sub>3</sub> <sup>-</sup> | KHCO <sub>3</sub> /K <sub>222</sub> | 33  | MeCN | 50 | 99 |
| 71  | QMA | HCO <sub>3</sub> <sup>-</sup> | KHCO <sub>3</sub> /K <sub>222</sub> | 25  | MeCN | 50 | 99 |
| 72  | QMA | HCO <sub>3</sub> <sup>-</sup> | KHCO <sub>3</sub> /K <sub>222</sub> | 10  | MeCN | 50 | 76 |
| 73  | QMA | HCO <sub>3</sub> <sup>-</sup> | KHCO <sub>3</sub> /K <sub>222</sub> | 5   | MeCN | 50 | 20 |
| 74  | QMA | Cl <sup>-</sup>               | KHCO <sub>3</sub> /18C6             | 100 | MeCN | 90 | 78 |
| 75  | QMA | Cl <sup>-</sup>               | KHCO <sub>3</sub> /18C6             | 75  | MeCN | 90 | 70 |
| 76  | QMA | Cl <sup>-</sup>               | KHCO <sub>3</sub> /18C6             | 50  | MeCN | 90 | 52 |
| 77  | QMA | Cl <sup>-</sup>               | KHCO <sub>3</sub> /18C6             | 33  | MeCN | 90 | 11 |
| 78  | QMA | Cl <sup>-</sup>               | KHCO <sub>3</sub> /18C6             | 25  | MeCN | 90 | 2  |
| 79  | QMA | Cl <sup>-</sup>               | KHCO <sub>3</sub> /18C6             | 10  | MeCN | 90 | 0  |
| 80  | QMA | Cl <sup>-</sup>               | KHCO <sub>3</sub> /18C6             | 5   | MeCN | 90 | 0  |
| 81  | QMA | HCO <sub>3</sub> <sup>-</sup> | KHCO <sub>3</sub> /18C6             | 100 | MeCN | 90 | 88 |
| 82  | QMA | HCO <sub>3</sub> <sup>-</sup> | KHCO <sub>3</sub> /18C6             | 75  | MeCN | 90 | 76 |
| 83  | QMA | HCO <sub>3</sub> <sup>-</sup> | KHCO <sub>3</sub> /18C6             | 50  | MeCN | 90 | 70 |
| 84  | QMA | HCO <sub>3</sub> <sup>-</sup> | KHCO <sub>3</sub> /18C6             | 33  | MeCN | 90 | 51 |
| 85  | QMA | HCO <sub>3</sub> <sup>-</sup> | KHCO <sub>3</sub> /18C6             | 25  | MeCN | 90 | 43 |
| 86  | QMA | HCO <sub>3</sub> <sup>-</sup> | KHCO <sub>3</sub> /18C6             | 10  | MeCN | 90 | 10 |
| 87  | QMA | HCO <sub>3</sub> <sup>-</sup> | KHCO <sub>3</sub> /18C6             | 5   | MeCN | 90 | 4  |
| 88  | QMA | HCO <sub>3</sub> <sup>-</sup> | KHCO <sub>3</sub> /18C6             | 100 | none | 0  | 96 |
| 89  | QMA | HCO <sub>3</sub> <sup>-</sup> | KHCO <sub>3</sub> /18C6             | 75  | none | 0  | 96 |
| 90  | QMA | HCO <sub>3</sub> <sup>-</sup> | KHCO <sub>3</sub> /18C6             | 50  | none | 0  | 94 |
| 91  | QMA | HCO <sub>3</sub> <sup>-</sup> | KHCO <sub>3</sub> /18C6             | 33  | none | 0  | 96 |
| 92  | QMA | HCO <sub>3</sub> <sup>-</sup> | KHCO <sub>3</sub> /18C6             | 25  | none | 0  | 96 |
| 93  | QMA | HCO <sub>3</sub> <sup>-</sup> | KHCO <sub>3</sub> /18C6             | 10  | none | 0  | 68 |
| 94  | QMA | HCO <sub>3</sub> <sup>-</sup> | KHCO <sub>3</sub> /18C6             | 5   | none | 0  | 7  |
| 95  | QMA | Cl <sup>-</sup>               | KHCO <sub>3</sub> /18C6             | 100 | none | 0  | 97 |
| 96  | QMA | Cl <sup>-</sup>               | KHCO <sub>3</sub> /18C6             | 75  | none | 0  | 97 |
| 97  | QMA | Cl <sup>-</sup>               | KHCO <sub>3</sub> /18C6             | 50  | none | 0  | 97 |
| 98  | QMA | Cl <sup>-</sup>               | KHCO <sub>3</sub> /18C6             | 33  | none | 0  | 96 |
| 99  | QMA | Cl <sup>-</sup>               | KHCO <sub>3</sub> /18C6             | 25  | none | 0  | 95 |
| 100 | QMA | Cl <sup>-</sup>               | KHCO <sub>3</sub> /18C6             | 10  | none | 0  | 53 |
| 101 | QMA | Cl <sup>-</sup>               | KHCO <sub>3</sub> /18C6             | 5   | none | 0  | 6  |
| 102 | QMA | HCO <sub>3</sub> <sup>-</sup> | KHCO <sub>3</sub> /18C6             | 100 | MeCN | 50 | 99 |
| 103 | QMA | HCO <sub>3</sub> <sup>-</sup> | KHCO <sub>3</sub> /18C6             | 75  | MeCN | 50 | 99 |
| 104 | QMA | HCO <sub>3</sub> <sup>-</sup> | KHCO <sub>3</sub> /18C6             | 50  | MeCN | 50 | 99 |
| 105 | QMA | HCO <sub>3</sub> <sup>-</sup> | KHCO <sub>3</sub> /18C6             | 33  | MeCN | 50 | 99 |
| 106 | QMA | HCO <sub>3</sub> <sup>-</sup> | KHCO <sub>3</sub> /18C6             | 25  | MeCN | 50 | 97 |
| 107 | QMA | HCO <sub>3</sub> <sup>-</sup> | KHCO <sub>3</sub> /18C6             | 10  | MeCN | 50 | 62 |
| 108 | QMA | HCO <sub>3</sub> <sup>-</sup> | KHCO <sub>3</sub> /18C6             | 5   | MeCN | 50 | 7  |
| 109 | QMA | Cl <sup>-</sup>               | Et <sub>4</sub> NHCO <sub>3</sub>   | 100 | MeCN | 90 | 52 |
| 110 | QMA | Cl <sup>-</sup>               | Et <sub>4</sub> NHCO <sub>3</sub>   | 75  | MeCN | 90 | 45 |
| 111 | QMA | Cl <sup>-</sup>               | Et <sub>4</sub> NHCO <sub>3</sub>   | 50  | MeCN | 90 | 35 |
| 112 | QMA | Cl <sup>-</sup>               | Et <sub>4</sub> NHCO <sub>3</sub>   | 33  | MeCN | 90 | 22 |
| 113 | QMA | Cl <sup>-</sup>               | Et <sub>4</sub> NHCO <sub>3</sub>   | 25  | MeCN | 90 | 6  |
| 114 | QMA | Cl <sup>-</sup>               | Et <sub>4</sub> NHCO <sub>3</sub>   | 10  | MeCN | 90 | 2  |
| 115 | QMA | Cl <sup>-</sup>               | Et <sub>4</sub> NHCO <sub>3</sub>   | 5   | MeCN | 90 | 1  |
| 116 | QMA | HCO <sub>3</sub> <sup>-</sup> | Et <sub>4</sub> NHCO <sub>3</sub>   | 100 | MeCN | 90 | 90 |
| 117 | QMA | HCO <sub>3</sub> <sup>-</sup> | Et <sub>4</sub> NHCO <sub>3</sub>   | 75  | MeCN | 90 | 80 |
| 118 | QMA | HCO <sub>3</sub> <sup>-</sup> | Et <sub>4</sub> NHCO <sub>3</sub>   | 50  | MeCN | 90 | 75 |

|     |     |                               |                                                    |     |      |    |     |
|-----|-----|-------------------------------|----------------------------------------------------|-----|------|----|-----|
| 119 | QMA | HCO <sub>3</sub> <sup>-</sup> | Et <sub>4</sub> NHCO <sub>3</sub>                  | 33  | MeCN | 90 | 65  |
| 120 | QMA | HCO <sub>3</sub> <sup>-</sup> | Et <sub>4</sub> NHCO <sub>3</sub>                  | 25  | MeCN | 90 | 50  |
| 121 | QMA | HCO <sub>3</sub> <sup>-</sup> | Et <sub>4</sub> NHCO <sub>3</sub>                  | 10  | MeCN | 90 | 22  |
| 122 | QMA | HCO <sub>3</sub> <sup>-</sup> | Et <sub>4</sub> NHCO <sub>3</sub>                  | 5   | MeCN | 90 | 8   |
| 123 | QMA | Cl <sup>-</sup>               | Et <sub>4</sub> NHCO <sub>3</sub>                  | 100 | none | 0  | 99  |
| 124 | QMA | Cl <sup>-</sup>               | Et <sub>4</sub> NHCO <sub>3</sub>                  | 75  | none | 0  | 98  |
| 125 | QMA | Cl <sup>-</sup>               | Et <sub>4</sub> NHCO <sub>3</sub>                  | 50  | none | 0  | 98  |
| 126 | QMA | Cl <sup>-</sup>               | Et <sub>4</sub> NHCO <sub>3</sub>                  | 33  | none | 0  | 97  |
| 127 | QMA | Cl <sup>-</sup>               | Et <sub>4</sub> NHCO <sub>3</sub>                  | 25  | none | 0  | 94  |
| 128 | QMA | Cl <sup>-</sup>               | Et <sub>4</sub> NHCO <sub>3</sub>                  | 10  | none | 0  | 25  |
| 129 | QMA | Cl <sup>-</sup>               | Et <sub>4</sub> NHCO <sub>3</sub>                  | 5   | none | 0  | 2   |
| 130 | QMA | HCO <sub>3</sub> <sup>-</sup> | Et <sub>4</sub> NHCO <sub>3</sub>                  | 100 | none | 0  | 99  |
| 131 | QMA | HCO <sub>3</sub> <sup>-</sup> | Et <sub>4</sub> NHCO <sub>3</sub>                  | 75  | none | 0  | 99  |
| 132 | QMA | HCO <sub>3</sub> <sup>-</sup> | Et <sub>4</sub> NHCO <sub>3</sub>                  | 50  | none | 0  | 99  |
| 133 | QMA | HCO <sub>3</sub> <sup>-</sup> | Et <sub>4</sub> NHCO <sub>3</sub>                  | 33  | none | 0  | 99  |
| 134 | QMA | HCO <sub>3</sub> <sup>-</sup> | Et <sub>4</sub> NHCO <sub>3</sub>                  | 25  | none | 0  | 98  |
| 135 | QMA | HCO <sub>3</sub> <sup>-</sup> | Et <sub>4</sub> NHCO <sub>3</sub>                  | 10  | none | 0  | 54  |
| 136 | QMA | HCO <sub>3</sub> <sup>-</sup> | Et <sub>4</sub> NHCO <sub>3</sub>                  | 5   | none | 0  | 7   |
| 137 | QMA | HCO <sub>3</sub> <sup>-</sup> | Et <sub>4</sub> NHCO <sub>3</sub>                  | 100 | MeCN | 50 | 100 |
| 138 | QMA | HCO <sub>3</sub> <sup>-</sup> | Et <sub>4</sub> NHCO <sub>3</sub>                  | 75  | MeCN | 50 | 99  |
| 139 | QMA | HCO <sub>3</sub> <sup>-</sup> | Et <sub>4</sub> NHCO <sub>3</sub>                  | 50  | MeCN | 50 | 99  |
| 140 | QMA | HCO <sub>3</sub> <sup>-</sup> | Et <sub>4</sub> NHCO <sub>3</sub>                  | 33  | MeCN | 50 | 96  |
| 141 | QMA | HCO <sub>3</sub> <sup>-</sup> | Et <sub>4</sub> NHCO <sub>3</sub>                  | 25  | MeCN | 50 | 94  |
| 142 | QMA | HCO <sub>3</sub> <sup>-</sup> | Et <sub>4</sub> NHCO <sub>3</sub>                  | 10  | MeCN | 50 | 35  |
| 143 | QMA | HCO <sub>3</sub> <sup>-</sup> | Et <sub>4</sub> NHCO <sub>3</sub>                  | 5   | MeCN | 50 | 2   |
| 144 | QMA | Cl <sup>-</sup>               | Cs <sub>2</sub> CO <sub>3</sub>                    | 100 | MeCN | 90 | 7   |
| 145 | QMA | HCO <sub>3</sub> <sup>-</sup> | K <sub>2</sub> C <sub>2</sub> O <sub>4</sub> /18C6 | 100 | none | 0  | 99  |
| 146 | QMA | HCO <sub>3</sub> <sup>-</sup> | K <sub>2</sub> C <sub>2</sub> O <sub>4</sub> /18C6 | 75  | none | 0  | 99  |
| 147 | QMA | HCO <sub>3</sub> <sup>-</sup> | K <sub>2</sub> C <sub>2</sub> O <sub>4</sub> /18C6 | 50  | none | 0  | 99  |
| 148 | QMA | HCO <sub>3</sub> <sup>-</sup> | K <sub>2</sub> C <sub>2</sub> O <sub>4</sub> /18C6 | 33  | none | 0  | 99  |
| 149 | QMA | HCO <sub>3</sub> <sup>-</sup> | K <sub>2</sub> C <sub>2</sub> O <sub>4</sub> /18C6 | 25  | none | 0  | 100 |
| 150 | QMA | HCO <sub>3</sub> <sup>-</sup> | K <sub>2</sub> C <sub>2</sub> O <sub>4</sub> /18C6 | 10  | none | 0  | 98  |
| 151 | QMA | HCO <sub>3</sub> <sup>-</sup> | K <sub>2</sub> C <sub>2</sub> O <sub>4</sub> /18C6 | 5   | none | 0  | 50  |
| 152 | QMA | Cl <sup>-</sup>               | K <sub>2</sub> C <sub>2</sub> O <sub>4</sub> /18C6 | 100 | none | 0  | 99  |
| 153 | QMA | Cl <sup>-</sup>               | K <sub>2</sub> C <sub>2</sub> O <sub>4</sub> /18C6 | 75  | none | 0  | 98  |
| 154 | QMA | Cl <sup>-</sup>               | K <sub>2</sub> C <sub>2</sub> O <sub>4</sub> /18C6 | 50  | none | 0  | 98  |
| 155 | QMA | Cl <sup>-</sup>               | K <sub>2</sub> C <sub>2</sub> O <sub>4</sub> /18C6 | 33  | none | 0  | 98  |
| 156 | QMA | Cl <sup>-</sup>               | K <sub>2</sub> C <sub>2</sub> O <sub>4</sub> /18C6 | 25  | none | 0  | 98  |
| 157 | QMA | Cl <sup>-</sup>               | K <sub>2</sub> C <sub>2</sub> O <sub>4</sub> /18C6 | 10  | none | 0  | 91  |
| 158 | QMA | Cl <sup>-</sup>               | K <sub>2</sub> C <sub>2</sub> O <sub>4</sub> /18C6 | 5   | none | 0  | 25  |
| 159 | QMA | HCO <sub>3</sub> <sup>-</sup> | K <sub>2</sub> C <sub>2</sub> O <sub>4</sub> /18C6 | 100 | MeCN | 50 | 98  |
| 160 | QMA | HCO <sub>3</sub> <sup>-</sup> | K <sub>2</sub> C <sub>2</sub> O <sub>4</sub> /18C6 | 75  | MeCN | 50 | 98  |
| 161 | QMA | HCO <sub>3</sub> <sup>-</sup> | K <sub>2</sub> C <sub>2</sub> O <sub>4</sub> /18C6 | 50  | MeCN | 50 | 98  |
| 162 | QMA | HCO <sub>3</sub> <sup>-</sup> | K <sub>2</sub> C <sub>2</sub> O <sub>4</sub> /18C6 | 33  | MeCN | 50 | 98  |
| 163 | QMA | HCO <sub>3</sub> <sup>-</sup> | K <sub>2</sub> C <sub>2</sub> O <sub>4</sub> /18C6 | 25  | MeCN | 50 | 98  |
| 164 | QMA | HCO <sub>3</sub> <sup>-</sup> | K <sub>2</sub> C <sub>2</sub> O <sub>4</sub> /18C6 | 10  | MeCN | 50 | 96  |
| 165 | QMA | HCO <sub>3</sub> <sup>-</sup> | K <sub>2</sub> C <sub>2</sub> O <sub>4</sub> /18C6 | 5   | MeCN | 50 | 67  |
| 166 | QMA | Cl <sup>-</sup>               | K <sub>2</sub> C <sub>2</sub> O <sub>4</sub> /18C6 | 100 | MeCN | 50 | 97  |
| 167 | QMA | Cl <sup>-</sup>               | K <sub>2</sub> C <sub>2</sub> O <sub>4</sub> /18C6 | 75  | MeCN | 50 | 97  |
| 168 | QMA | Cl <sup>-</sup>               | K <sub>2</sub> C <sub>2</sub> O <sub>4</sub> /18C6 | 50  | MeCN | 50 | 97  |
| 169 | QMA | Cl <sup>-</sup>               | K <sub>2</sub> C <sub>2</sub> O <sub>4</sub> /18C6 | 33  | MeCN | 50 | 97  |

|     |     |                               |                                                    |     |      |    |     |
|-----|-----|-------------------------------|----------------------------------------------------|-----|------|----|-----|
| 170 | QMA | Cl <sup>-</sup>               | K <sub>2</sub> C <sub>2</sub> O <sub>4</sub> /18C6 | 25  | MeCN | 50 | 97  |
| 171 | QMA | Cl <sup>-</sup>               | K <sub>2</sub> C <sub>2</sub> O <sub>4</sub> /18C6 | 10  | MeCN | 50 | 61  |
| 172 | QMA | Cl <sup>-</sup>               | K <sub>2</sub> C <sub>2</sub> O <sub>4</sub> /18C6 | 5   | MeCN | 50 | 12  |
| 173 | QMA | HCO <sub>3</sub> <sup>-</sup> | K <sub>2</sub> C <sub>2</sub> O <sub>4</sub> /18C6 | 100 | MeCN | 90 | 96  |
| 174 | QMA | HCO <sub>3</sub> <sup>-</sup> | K <sub>2</sub> C <sub>2</sub> O <sub>4</sub> /18C6 | 75  | MeCN | 90 | 98  |
| 175 | QMA | HCO <sub>3</sub> <sup>-</sup> | K <sub>2</sub> C <sub>2</sub> O <sub>4</sub> /18C6 | 50  | MeCN | 90 | 96  |
| 176 | QMA | HCO <sub>3</sub> <sup>-</sup> | K <sub>2</sub> C <sub>2</sub> O <sub>4</sub> /18C6 | 33  | MeCN | 90 | 90  |
| 177 | QMA | HCO <sub>3</sub> <sup>-</sup> | K <sub>2</sub> C <sub>2</sub> O <sub>4</sub> /18C6 | 25  | MeCN | 90 | 86  |
| 178 | QMA | HCO <sub>3</sub> <sup>-</sup> | K <sub>2</sub> C <sub>2</sub> O <sub>4</sub> /18C6 | 10  | MeCN | 90 | 94  |
| 179 | QMA | HCO <sub>3</sub> <sup>-</sup> | K <sub>2</sub> C <sub>2</sub> O <sub>4</sub> /18C6 | 5   | MeCN | 90 | 32  |
| 180 | QMA | Cl <sup>-</sup>               | K <sub>2</sub> C <sub>2</sub> O <sub>4</sub> /18C6 | 100 | MeCN | 90 | 87  |
| 181 | QMA | Cl <sup>-</sup>               | K <sub>2</sub> C <sub>2</sub> O <sub>4</sub> /18C6 | 75  | MeCN | 90 | 81  |
| 182 | QMA | Cl <sup>-</sup>               | K <sub>2</sub> C <sub>2</sub> O <sub>4</sub> /18C6 | 50  | MeCN | 90 | 76  |
| 183 | QMA | Cl <sup>-</sup>               | K <sub>2</sub> C <sub>2</sub> O <sub>4</sub> /18C6 | 33  | MeCN | 90 | 67  |
| 184 | QMA | Cl <sup>-</sup>               | K <sub>2</sub> C <sub>2</sub> O <sub>4</sub> /18C6 | 25  | MeCN | 90 | 43  |
| 185 | QMA | Cl <sup>-</sup>               | K <sub>2</sub> C <sub>2</sub> O <sub>4</sub> /18C6 | 10  | MeCN | 90 | 2   |
| 186 | QMA | Cl <sup>-</sup>               | K <sub>2</sub> C <sub>2</sub> O <sub>4</sub> /18C6 | 5   | MeCN | 90 | 2   |
| 187 | QMA | HCO <sub>3</sub> <sup>-</sup> | NaOAc                                              | 100 | none | 0  | 100 |
| 188 | QMA | HCO <sub>3</sub> <sup>-</sup> | NaOAc                                              | 20  | none | 0  | 84  |
| 189 | QMA | HCO <sub>3</sub> <sup>-</sup> | NaOAc                                              | 10  | none | 0  | 40  |
| 190 | QMA | HCO <sub>3</sub> <sup>-</sup> | NaOAc                                              | 5   | none | 0  | 24  |
| 191 | QMA | Cl <sup>-</sup>               | DBU                                                | 100 | MeCN | 90 | 9   |
| 192 | QMA | Cl <sup>-</sup>               | DBU                                                | 75  | MeCN | 90 | 7   |
| 193 | QMA | Cl <sup>-</sup>               | DBU                                                | 50  | MeCN | 90 | 4   |
| 194 | QMA | Cl <sup>-</sup>               | DBU                                                | 33  | MeCN | 90 | 2   |
| 195 | QMA | Cl <sup>-</sup>               | DBU                                                | 25  | MeCN | 90 | 1   |
| 196 | QMA | Cl <sup>-</sup>               | DBU                                                | 10  | MeCN | 90 | 0   |
| 197 | QMA | Cl <sup>-</sup>               | DBU                                                | 5   | MeCN | 90 | 0   |
| 198 | QMA | Cl <sup>-</sup>               | DBU                                                | 5   | none | 0  | 81  |
| 199 | QMA | Cl <sup>-</sup>               | DBU                                                | 10  | none | 0  | 79  |
| 200 | QMA | Cl <sup>-</sup>               | DBU                                                | 20  | none | 0  | 95  |
| 201 | QMA | Cl <sup>-</sup>               | DBU                                                | 33  | none | 0  | 97  |
| 202 | QMA | Cl <sup>-</sup>               | DBU                                                | 50  | none | 0  | 98  |
| 203 | QMA | Cl <sup>-</sup>               | DBU                                                | 75  | none | 0  | 98  |
| 204 | QMA | Cl <sup>-</sup>               | DBU                                                | 100 | none | 0  | 98  |
| 205 | QMA | HCO <sub>3</sub> <sup>-</sup> | DBU                                                | 2   | none | 0  | 2   |
| 206 | QMA | HCO <sub>3</sub> <sup>-</sup> | DBU                                                | 3,3 | none | 0  | 7   |
| 207 | QMA | HCO <sub>3</sub> <sup>-</sup> | DBU                                                | 5   | none | 0  | 22  |
| 208 | QMA | HCO <sub>3</sub> <sup>-</sup> | DBU                                                | 5   | none | 0  | 24  |
| 209 | QMA | HCO <sub>3</sub> <sup>-</sup> | DBU                                                | 5   | none | 0  | 16  |
| 210 | QMA | HCO <sub>3</sub> <sup>-</sup> | DBU                                                | 10  | none | 0  | 87  |
| 211 | QMA | HCO <sub>3</sub> <sup>-</sup> | DBU                                                | 20  | none | 0  | 99  |
| 212 | QMA | HCO <sub>3</sub> <sup>-</sup> | DBU                                                | 50  | none | 0  | 99  |
| 213 | QMA | HCO <sub>3</sub> <sup>-</sup> | DBU                                                | 5   | none | 0  | 98  |
| 214 | QMA | HCO <sub>3</sub> <sup>-</sup> | DBU                                                | 5   | none | 0  | 98  |
| 215 | QMA | HCO <sub>3</sub> <sup>-</sup> | DBU                                                | 10  | none | 0  | 97  |
| 216 | QMA | HCO <sub>3</sub> <sup>-</sup> | DBU                                                | 20  | none | 0  | 99  |
| 217 | QMA | Cl <sup>-</sup>               | DBU                                                | 5   | none | 0  | 10  |
| 218 | QMA | Cl <sup>-</sup>               | DBU                                                | 10  | none | 0  | 61  |
| 219 | QMA | HCO <sub>3</sub> <sup>-</sup> | DBU                                                | 100 | MeCN | 50 | 100 |
| 220 | QMA | HCO <sub>3</sub> <sup>-</sup> | DBU                                                | 75  | MeCN | 50 | 100 |

|     |     |                               |                   |     |      |    |     |
|-----|-----|-------------------------------|-------------------|-----|------|----|-----|
| 221 | QMA | HCO <sub>3</sub> <sup>-</sup> | DBU               | 50  | MeCN | 50 | 100 |
| 222 | QMA | HCO <sub>3</sub> <sup>-</sup> | DBU               | 33  | MeCN | 50 | 100 |
| 223 | QMA | HCO <sub>3</sub> <sup>-</sup> | DBU               | 25  | MeCN | 50 | 100 |
| 224 | QMA | HCO <sub>3</sub> <sup>-</sup> | DBU               | 10  | MeCN | 50 | 46  |
| 225 | QMA | HCO <sub>3</sub> <sup>-</sup> | DBU               | 5   | MeCN | 50 | 3   |
| 226 | QMA | HCO <sub>3</sub> <sup>-</sup> | DBU               | 100 | MeCN | 90 | 87  |
| 227 | QMA | HCO <sub>3</sub> <sup>-</sup> | DBU               | 75  | MeCN | 90 | 84  |
| 228 | QMA | HCO <sub>3</sub> <sup>-</sup> | DBU               | 50  | MeCN | 90 | 80  |
| 229 | QMA | HCO <sub>3</sub> <sup>-</sup> | DBU               | 33  | MeCN | 90 | 76  |
| 230 | QMA | HCO <sub>3</sub> <sup>-</sup> | DBU               | 25  | MeCN | 90 | 74  |
| 231 | QMA | HCO <sub>3</sub> <sup>-</sup> | DBU               | 100 | MeCN | 90 | 87  |
| 232 | QMA | HCO <sub>3</sub> <sup>-</sup> | DBU               | 100 | MeCN | 50 | 100 |
| 233 | QMA | HCO <sub>3</sub> <sup>-</sup> | DBU               | 10  | MeCN | 90 | 63  |
| 234 | QMA | HCO <sub>3</sub> <sup>-</sup> | DBU               | 10  | MeCN | 50 | 95  |
| 235 | QMA | HCO <sub>3</sub> <sup>-</sup> | DBU               | 100 | MeCN | 10 | 100 |
| 236 | QMA | HCO <sub>3</sub> <sup>-</sup> | DBU               | 10  | none | 0  | 98  |
| 237 | QMA | HCO <sub>3</sub> <sup>-</sup> | DBU               | 10  | MeCN | 90 | 29  |
| 238 | QMA | HCO <sub>3</sub> <sup>-</sup> | DBU               | 5   | MeCN | 90 | 6   |
| 239 | QMA | Cl <sup>-</sup>               | Et <sub>3</sub> N | 100 | MeCN | 90 | 0   |
| 240 | QMA | Cl <sup>-</sup>               | Et <sub>3</sub> N | 75  | MeCN | 90 | 0   |
| 241 | QMA | Cl <sup>-</sup>               | Et <sub>3</sub> N | 50  | MeCN | 90 | 0   |
| 242 | QMA | Cl <sup>-</sup>               | Et <sub>3</sub> N | 33  | MeCN | 90 | 0   |
| 243 | QMA | Cl <sup>-</sup>               | Et <sub>3</sub> N | 25  | MeCN | 90 | 0   |
| 244 | QMA | Cl <sup>-</sup>               | Et <sub>3</sub> N | 10  | MeCN | 90 | 0   |
| 245 | QMA | Cl <sup>-</sup>               | Et <sub>3</sub> N | 5   | MeCN | 90 | 0   |
| 246 | QMA | HCO <sub>3</sub> <sup>-</sup> | Et <sub>3</sub> N | 100 | MeCN | 90 | 2   |
| 247 | QMA | HCO <sub>3</sub> <sup>-</sup> | Et <sub>3</sub> N | 75  | MeCN | 90 | 1   |
| 248 | QMA | HCO <sub>3</sub> <sup>-</sup> | Et <sub>3</sub> N | 50  | MeCN | 90 | 0   |
| 249 | QMA | HCO <sub>3</sub> <sup>-</sup> | Et <sub>3</sub> N | 33  | MeCN | 90 | 0   |
| 250 | QMA | HCO <sub>3</sub> <sup>-</sup> | Et <sub>3</sub> N | 25  | MeCN | 90 | 0   |
| 251 | QMA | HCO <sub>3</sub> <sup>-</sup> | Et <sub>3</sub> N | 10  | MeCN | 90 | 0   |
| 252 | QMA | HCO <sub>3</sub> <sup>-</sup> | Et <sub>3</sub> N | 5   | MeCN | 90 | 0   |
| 253 | QMA | HCO <sub>3</sub> <sup>-</sup> | Et <sub>3</sub> N | 100 | MeCN | 90 | 3   |
| 254 | QMA | HCO <sub>3</sub> <sup>-</sup> | Et <sub>3</sub> N | 100 | MeCN | 50 | 97  |
| 255 | QMA | HCO <sub>3</sub> <sup>-</sup> | Et <sub>3</sub> N | 100 | MeCN | 10 | 99  |
| 256 | QMA | Cl <sup>-</sup>               | Et <sub>3</sub> N | 5   | none | 0  | 2   |
| 257 | QMA | Cl <sup>-</sup>               | Et <sub>3</sub> N | 10  | none | 0  | 10  |
| 258 | QMA | Cl <sup>-</sup>               | Et <sub>3</sub> N | 20  | none | 0  | 39  |
| 259 | QMA | Cl <sup>-</sup>               | Et <sub>3</sub> N | 33  | none | 0  | 44  |
| 260 | QMA | Cl <sup>-</sup>               | Et <sub>3</sub> N | 50  | none | 0  | 55  |
| 261 | QMA | Cl <sup>-</sup>               | Et <sub>3</sub> N | 75  | none | 0  | 59  |
| 262 | QMA | Cl <sup>-</sup>               | Et <sub>3</sub> N | 100 | none | 0  | 71  |
| 263 | QMA | HCO <sub>3</sub> <sup>-</sup> | Et <sub>3</sub> N | 5   | MeCN | 50 | 8   |
| 264 | QMA | HCO <sub>3</sub> <sup>-</sup> | Et <sub>3</sub> N | 10  | MeCN | 50 | 50  |
| 265 | QMA | HCO <sub>3</sub> <sup>-</sup> | Et <sub>3</sub> N | 20  | MeCN | 50 | 81  |
| 266 | QMA | HCO <sub>3</sub> <sup>-</sup> | Et <sub>3</sub> N | 33  | MeCN | 50 | 84  |
| 267 | QMA | HCO <sub>3</sub> <sup>-</sup> | Et <sub>3</sub> N | 50  | MeCN | 50 | 93  |
| 268 | QMA | HCO <sub>3</sub> <sup>-</sup> | Et <sub>3</sub> N | 75  | MeCN | 50 | 92  |
| 269 | QMA | HCO <sub>3</sub> <sup>-</sup> | Et <sub>3</sub> N | 100 | MeCN | 50 | 93  |
| 270 | QMA | HCO <sub>3</sub> <sup>-</sup> | Et <sub>3</sub> N | 5   | none | 0  | 21  |
| 271 | QMA | HCO <sub>3</sub> <sup>-</sup> | Et <sub>3</sub> N | 10  | none | 0  | 28  |

|     |     |                               |                   |     |      |    |     |
|-----|-----|-------------------------------|-------------------|-----|------|----|-----|
| 272 | QMA | HCO <sub>3</sub> <sup>-</sup> | Et <sub>3</sub> N | 20  | none | 0  | 97  |
| 273 | QMA | HCO <sub>3</sub> <sup>-</sup> | Et <sub>3</sub> N | 33  | none | 0  | 99  |
| 274 | QMA | HCO <sub>3</sub> <sup>-</sup> | Et <sub>3</sub> N | 50  | none | 0  | 100 |
| 275 | QMA | HCO <sub>3</sub> <sup>-</sup> | Et <sub>3</sub> N | 75  | none | 0  | 99  |
| 276 | QMA | HCO <sub>3</sub> <sup>-</sup> | Et <sub>3</sub> N | 100 | none | 0  | 99  |
| 277 | QMA | Cl <sup>-</sup>               | DIPEA             | 5   | none | 0  | 12  |
| 278 | QMA | Cl <sup>-</sup>               | DIPEA             | 10  | none | 0  | 80  |
| 279 | QMA | Cl <sup>-</sup>               | DIPEA             | 25  | none | 0  | 94  |
| 280 | QMA | Cl <sup>-</sup>               | DIPEA             | 33  | none | 0  | 95  |
| 281 | QMA | Cl <sup>-</sup>               | DIPEA             | 50  | none | 0  | 97  |
| 282 | QMA | Cl <sup>-</sup>               | DIPEA             | 75  | none | 0  | 97  |
| 283 | QMA | Cl <sup>-</sup>               | DIPEA             | 75  | none | 0  | 81  |
| 284 | QMA | Cl <sup>-</sup>               | DIPEA             | 100 | none | 0  | 97  |
| 285 | QMA | Cl <sup>-</sup>               | DIPEA             | 5   | MeCN | 90 | 0   |
| 286 | QMA | Cl <sup>-</sup>               | DIPEA             | 10  | MeCN | 90 | 0   |
| 287 | QMA | Cl <sup>-</sup>               | DIPEA             | 25  | MeCN | 90 | 0   |
| 288 | QMA | Cl <sup>-</sup>               | DIPEA             | 33  | MeCN | 90 | 1   |
| 289 | QMA | Cl <sup>-</sup>               | DIPEA             | 50  | MeCN | 90 | 0   |
| 290 | QMA | Cl <sup>-</sup>               | DIPEA             | 75  | MeCN | 90 | 2   |
| 291 | QMA | Cl <sup>-</sup>               | DIPEA             | 100 | MeCN | 90 | 0   |
| 292 | QMA | HCO <sub>3</sub> <sup>-</sup> | DIPEA             | 5   | MeCN | 90 | 0   |
| 293 | QMA | HCO <sub>3</sub> <sup>-</sup> | DIPEA             | 10  | MeCN | 90 | 1   |
| 294 | QMA | HCO <sub>3</sub> <sup>-</sup> | DIPEA             | 25  | MeCN | 90 | 1   |
| 295 | QMA | HCO <sub>3</sub> <sup>-</sup> | DIPEA             | 33  | MeCN | 90 | 3   |
| 296 | QMA | HCO <sub>3</sub> <sup>-</sup> | DIPEA             | 50  | MeCN | 90 | 0   |
| 297 | QMA | HCO <sub>3</sub> <sup>-</sup> | DIPEA             | 75  | MeCN | 90 | 6   |
| 298 | QMA | HCO <sub>3</sub> <sup>-</sup> | DIPEA             | 100 | MeCN | 90 | 4   |
| 299 | QMA | HCO <sub>3</sub> <sup>-</sup> | DIPEA             | 5   | MeCN | 50 | 9   |
| 300 | QMA | HCO <sub>3</sub> <sup>-</sup> | DIPEA             | 10  | MeCN | 50 | 76  |
| 301 | QMA | HCO <sub>3</sub> <sup>-</sup> | DIPEA             | 25  | MeCN | 50 | 93  |
| 302 | QMA | HCO <sub>3</sub> <sup>-</sup> | DIPEA             | 33  | MeCN | 50 | 98  |
| 303 | QMA | HCO <sub>3</sub> <sup>-</sup> | DIPEA             | 50  | MeCN | 50 | 94  |
| 304 | QMA | HCO <sub>3</sub> <sup>-</sup> | DIPEA             | 75  | MeCN | 50 | 99  |
| 305 | QMA | HCO <sub>3</sub> <sup>-</sup> | DIPEA             | 100 | MeCN | 50 | 96  |
| 306 | QMA | HCO <sub>3</sub> <sup>-</sup> | DIPEA             | 5   | none | 0  | 55  |
| 307 | QMA | HCO <sub>3</sub> <sup>-</sup> | DIPEA             | 10  | none | 0  | 91  |
| 308 | QMA | HCO <sub>3</sub> <sup>-</sup> | DIPEA             | 25  | none | 0  | 100 |
| 309 | QMA | HCO <sub>3</sub> <sup>-</sup> | DIPEA             | 33  | none | 0  | 99  |
| 310 | QMA | HCO <sub>3</sub> <sup>-</sup> | DIPEA             | 50  | none | 0  | 99  |
| 311 | QMA | HCO <sub>3</sub> <sup>-</sup> | DIPEA             | 75  | none | 0  | 99  |
| 312 | QMA | HCO <sub>3</sub> <sup>-</sup> | DIPEA             | 100 | none | 0  | 99  |
| 313 | QMA | Cl <sup>-</sup>               | DMAP              | 100 | MeCN | 90 | 0   |
| 314 | QMA | Cl <sup>-</sup>               | DMAP              | 75  | MeCN | 90 | 0   |
| 315 | QMA | Cl <sup>-</sup>               | DMAP              | 50  | MeCN | 90 | 0   |
| 316 | QMA | Cl <sup>-</sup>               | DMAP              | 33  | MeCN | 90 | 0   |
| 317 | QMA | Cl <sup>-</sup>               | DMAP              | 25  | MeCN | 90 | 0   |
| 318 | QMA | Cl <sup>-</sup>               | DMAP              | 10  | MeCN | 90 | 0   |
| 319 | QMA | Cl <sup>-</sup>               | DMAP              | 5   | MeCN | 90 | 0   |
| 320 | QMA | Cl <sup>-</sup>               | DMAP              | 100 | MeOH | 50 | 0   |
| 321 | QMA | Cl <sup>-</sup>               | DMAP              | 100 | MeCN | 90 | 0   |
| 322 | QMA | HCO <sub>3</sub> <sup>-</sup> | DMAP              | 100 | MeCN | 90 | 0   |

|     |     |                               |                                                  |     |      |    |    |
|-----|-----|-------------------------------|--------------------------------------------------|-----|------|----|----|
| 323 | QMA | HCO <sub>3</sub> <sup>-</sup> | DMAP                                             | 75  | MeCN | 90 | 0  |
| 324 | QMA | HCO <sub>3</sub> <sup>-</sup> | DMAP                                             | 50  | MeCN | 90 | 0  |
| 325 | QMA | HCO <sub>3</sub> <sup>-</sup> | DMAP                                             | 33  | MeCN | 90 | 0  |
| 326 | QMA | HCO <sub>3</sub> <sup>-</sup> | DMAP                                             | 25  | MeCN | 90 | 0  |
| 327 | QMA | HCO <sub>3</sub> <sup>-</sup> | DMAP                                             | 10  | MeCN | 90 | 0  |
| 328 | QMA | HCO <sub>3</sub> <sup>-</sup> | DMAP                                             | 5   | MeCN | 90 | 0  |
| 329 | QMA | Cl <sup>-</sup>               | DMAP                                             | 100 | none | 0  | 13 |
| 330 | QMA | Cl <sup>-</sup>               | DMAP                                             | 75  | none | 0  | 14 |
| 331 | QMA | Cl <sup>-</sup>               | DMAP                                             | 50  | none | 0  | 7  |
| 332 | QMA | Cl <sup>-</sup>               | DMAP                                             | 33  | none | 0  | 9  |
| 333 | QMA | Cl <sup>-</sup>               | DMAP                                             | 25  | none | 0  | 4  |
| 334 | QMA | Cl <sup>-</sup>               | DMAP                                             | 10  | none | 0  | 4  |
| 335 | QMA | Cl <sup>-</sup>               | DMAP                                             | 5   | none | 0  | 2  |
| 336 | QMA | HCO <sub>3</sub> <sup>-</sup> | DMAP                                             | 100 | none | 0  | 99 |
| 337 | QMA | HCO <sub>3</sub> <sup>-</sup> | DMAP                                             | 75  | none | 0  | 99 |
| 338 | QMA | HCO <sub>3</sub> <sup>-</sup> | DMAP                                             | 50  | none | 0  | 99 |
| 339 | QMA | HCO <sub>3</sub> <sup>-</sup> | DMAP                                             | 33  | none | 0  | 99 |
| 340 | QMA | HCO <sub>3</sub> <sup>-</sup> | DMAP                                             | 25  | none | 0  | 97 |
| 341 | QMA | HCO <sub>3</sub> <sup>-</sup> | DMAP                                             | 10  | none | 0  | 52 |
| 342 | QMA | HCO <sub>3</sub> <sup>-</sup> | DMAP                                             | 5   | none | 0  | 3  |
| 343 | QMA | HCO <sub>3</sub> <sup>-</sup> | DMAP                                             | 100 | MeCN | 50 | 13 |
| 344 | QMA | HCO <sub>3</sub> <sup>-</sup> | DMAP                                             | 75  | MeCN | 50 | 4  |
| 345 | QMA | HCO <sub>3</sub> <sup>-</sup> | DMAP                                             | 50  | MeCN | 50 | 15 |
| 346 | QMA | HCO <sub>3</sub> <sup>-</sup> | DMAP                                             | 33  | MeCN | 50 | 9  |
| 347 | QMA | HCO <sub>3</sub> <sup>-</sup> | DMAP                                             | 25  | MeCN | 50 | 1  |
| 348 | QMA | HCO <sub>3</sub> <sup>-</sup> | DMAP                                             | 10  | MeCN | 50 | 0  |
| 349 | QMA | HCO <sub>3</sub> <sup>-</sup> | DMAP                                             | 5   | MeCN | 50 | 0  |
| 350 | QMA | HCO <sub>3</sub> <sup>-</sup> | DMAP                                             | 100 | MeCN | 90 | 0  |
| 351 | QMA | HCO <sub>3</sub> <sup>-</sup> | DMAP                                             | 100 | MeCN | 50 | 33 |
| 352 | QMA | HCO <sub>3</sub> <sup>-</sup> | DMAP                                             | 100 | MeCN | 90 | 0  |
| 353 | QMA | HCO <sub>3</sub> <sup>-</sup> | DMAP                                             | 100 | MeCN | 50 | 35 |
| 354 | QMA | HCO <sub>3</sub> <sup>-</sup> | DMAP                                             | 100 | none | 0  | 94 |
| 355 | QMA | HCO <sub>3</sub> <sup>-</sup> | DMAP                                             | 100 | none | 0  | 96 |
| 356 | QMA | HCO <sub>3</sub> <sup>-</sup> | pyridine                                         | 100 | MeCN | 90 | 0  |
| 357 | QMA | HCO <sub>3</sub> <sup>-</sup> | pyridine                                         | 100 | MeCN | 50 | 0  |
| 358 | QMA | HCO <sub>3</sub> <sup>-</sup> | pyridine                                         | 500 | none | 0  | 1  |
| 359 | QMA | HCO <sub>3</sub> <sup>-</sup> | pyridine                                         | 100 | MeCN | 10 | 0  |
| 360 | QMA | HCO <sub>3</sub> <sup>-</sup> | Cu(OTf) <sub>2</sub>                             | 20  | none | 0  | 62 |
| 361 | QMA | HCO <sub>3</sub> <sup>-</sup> | Cu(OTf) <sub>2</sub>                             | 100 | none | 0  | 98 |
| 362 | QMA | Cl <sup>-</sup>               | (Bu <sub>4</sub> N) <sub>2</sub> SO <sub>4</sub> | 5   | MeCN | 90 | 82 |
| 363 | QMA | Cl <sup>-</sup>               | (Bu <sub>4</sub> N) <sub>2</sub> SO <sub>4</sub> | 10  | MeCN | 90 | 81 |
| 364 | QMA | Cl <sup>-</sup>               | (Bu <sub>4</sub> N) <sub>2</sub> SO <sub>4</sub> | 20  | MeCN | 90 | 79 |
| 365 | QMA | Cl <sup>-</sup>               | (Bu <sub>4</sub> N) <sub>2</sub> SO <sub>4</sub> | 33  | MeCN | 90 | 85 |
| 366 | QMA | Cl <sup>-</sup>               | (Bu <sub>4</sub> N) <sub>2</sub> SO <sub>4</sub> | 50  | MeCN | 90 | 89 |
| 367 | QMA | Cl <sup>-</sup>               | (Bu <sub>4</sub> N) <sub>2</sub> SO <sub>4</sub> | 75  | MeCN | 90 | 91 |
| 368 | QMA | Cl <sup>-</sup>               | (Bu <sub>4</sub> N) <sub>2</sub> SO <sub>4</sub> | 100 | MeCN | 90 | 90 |
| 369 | QMA | HCO <sub>3</sub> <sup>-</sup> | (Bu <sub>4</sub> N) <sub>2</sub> SO <sub>4</sub> | 5   | MeCN | 90 | 56 |
| 370 | QMA | HCO <sub>3</sub> <sup>-</sup> | (Bu <sub>4</sub> N) <sub>2</sub> SO <sub>4</sub> | 10  | MeCN | 90 | 68 |
| 371 | QMA | HCO <sub>3</sub> <sup>-</sup> | (Bu <sub>4</sub> N) <sub>2</sub> SO <sub>4</sub> | 20  | MeCN | 90 | 78 |
| 372 | QMA | HCO <sub>3</sub> <sup>-</sup> | (Bu <sub>4</sub> N) <sub>2</sub> SO <sub>4</sub> | 33  | MeCN | 90 | 81 |
| 373 | QMA | HCO <sub>3</sub> <sup>-</sup> | (Bu <sub>4</sub> N) <sub>2</sub> SO <sub>4</sub> | 50  | MeCN | 90 | 81 |

|     |     |                               |                                                  |     |      |    |     |
|-----|-----|-------------------------------|--------------------------------------------------|-----|------|----|-----|
| 374 | QMA | HCO <sub>3</sub> <sup>-</sup> | (Bu <sub>4</sub> N) <sub>2</sub> SO <sub>4</sub> | 75  | MeCN | 90 | 84  |
| 375 | QMA | HCO <sub>3</sub> <sup>-</sup> | (Bu <sub>4</sub> N) <sub>2</sub> SO <sub>4</sub> | 100 | MeCN | 90 | 84  |
| 376 | QMA | Cl <sup>-</sup>               | (Bu <sub>4</sub> N) <sub>2</sub> SO <sub>4</sub> | 5   | none | 0  | 64  |
| 377 | QMA | Cl <sup>-</sup>               | (Bu <sub>4</sub> N) <sub>2</sub> SO <sub>4</sub> | 10  | none | 0  | 71  |
| 378 | QMA | Cl <sup>-</sup>               | (Bu <sub>4</sub> N) <sub>2</sub> SO <sub>4</sub> | 20  | none | 0  | 83  |
| 379 | QMA | Cl <sup>-</sup>               | (Bu <sub>4</sub> N) <sub>2</sub> SO <sub>4</sub> | 33  | none | 0  | 87  |
| 380 | QMA | Cl <sup>-</sup>               | (Bu <sub>4</sub> N) <sub>2</sub> SO <sub>4</sub> | 50  | none | 0  | 89  |
| 381 | QMA | Cl <sup>-</sup>               | (Bu <sub>4</sub> N) <sub>2</sub> SO <sub>4</sub> | 75  | none | 0  | 87  |
| 382 | QMA | Cl <sup>-</sup>               | (Bu <sub>4</sub> N) <sub>2</sub> SO <sub>4</sub> | 100 | none | 0  | 89  |
| 383 | QMA | HCO <sub>3</sub> <sup>-</sup> | (Bu <sub>4</sub> N) <sub>2</sub> SO <sub>4</sub> | 5   | none | 0  | 74  |
| 384 | QMA | HCO <sub>3</sub> <sup>-</sup> | (Bu <sub>4</sub> N) <sub>2</sub> SO <sub>4</sub> | 10  | none | 0  | 91  |
| 385 | QMA | HCO <sub>3</sub> <sup>-</sup> | (Bu <sub>4</sub> N) <sub>2</sub> SO <sub>4</sub> | 20  | none | 0  | 94  |
| 386 | QMA | HCO <sub>3</sub> <sup>-</sup> | (Bu <sub>4</sub> N) <sub>2</sub> SO <sub>4</sub> | 33  | none | 0  | 88  |
| 387 | QMA | HCO <sub>3</sub> <sup>-</sup> | (Bu <sub>4</sub> N) <sub>2</sub> SO <sub>4</sub> | 50  | none | 0  | 94  |
| 388 | QMA | HCO <sub>3</sub> <sup>-</sup> | (Bu <sub>4</sub> N) <sub>2</sub> SO <sub>4</sub> | 75  | none | 0  | 94  |
| 389 | QMA | HCO <sub>3</sub> <sup>-</sup> | (Bu <sub>4</sub> N) <sub>2</sub> SO <sub>4</sub> | 100 | none | 0  | 93  |
| 390 | QMA | HCO <sub>3</sub> <sup>-</sup> | (Bu <sub>4</sub> N) <sub>2</sub> SO <sub>4</sub> | 5   | MeCN | 50 | 86  |
| 391 | QMA | HCO <sub>3</sub> <sup>-</sup> | (Bu <sub>4</sub> N) <sub>2</sub> SO <sub>4</sub> | 10  | MeCN | 50 | 89  |
| 392 | QMA | HCO <sub>3</sub> <sup>-</sup> | (Bu <sub>4</sub> N) <sub>2</sub> SO <sub>4</sub> | 20  | MeCN | 50 | 89  |
| 393 | QMA | HCO <sub>3</sub> <sup>-</sup> | (Bu <sub>4</sub> N) <sub>2</sub> SO <sub>4</sub> | 33  | MeCN | 50 | 90  |
| 394 | QMA | HCO <sub>3</sub> <sup>-</sup> | (Bu <sub>4</sub> N) <sub>2</sub> SO <sub>4</sub> | 50  | MeCN | 50 | 89  |
| 395 | QMA | HCO <sub>3</sub> <sup>-</sup> | (Bu <sub>4</sub> N) <sub>2</sub> SO <sub>4</sub> | 75  | MeCN | 50 | 89  |
| 396 | QMA | HCO <sub>3</sub> <sup>-</sup> | (Bu <sub>4</sub> N) <sub>2</sub> SO <sub>4</sub> | 100 | MeCN | 50 | 90  |
| 397 | QMA | HCO <sub>3</sub> <sup>-</sup> | Bu <sub>4</sub> NOMs                             | 100 | none | 0  | 99  |
| 398 | QMA | HCO <sub>3</sub> <sup>-</sup> | Bu <sub>4</sub> NOMs                             | 20  | none | 0  | 93  |
| 399 | QMA | HCO <sub>3</sub> <sup>-</sup> | Bu <sub>4</sub> NOMs                             | 10  | none | 0  | 47  |
| 400 | QMA | HCO <sub>3</sub> <sup>-</sup> | Bu <sub>4</sub> NOMs                             | 5   | none | 0  | 22  |
| 401 | QMA | HCO <sub>3</sub> <sup>-</sup> | Bu <sub>4</sub> NOMs                             | 100 | MeCN | 50 | 100 |
| 402 | QMA | HCO <sub>3</sub> <sup>-</sup> | Bu <sub>4</sub> NOMs                             | 75  | MeCN | 50 | 99  |
| 403 | QMA | HCO <sub>3</sub> <sup>-</sup> | Bu <sub>4</sub> NOMs                             | 50  | MeCN | 50 | 98  |
| 404 | QMA | HCO <sub>3</sub> <sup>-</sup> | Bu <sub>4</sub> NOMs                             | 33  | MeCN | 50 | 95  |
| 405 | QMA | HCO <sub>3</sub> <sup>-</sup> | Bu <sub>4</sub> NOMs                             | 25  | MeCN | 50 | 90  |
| 406 | QMA | HCO <sub>3</sub> <sup>-</sup> | Bu <sub>4</sub> NOMs                             | 10  | MeCN | 50 | 30  |
| 407 | QMA | HCO <sub>3</sub> <sup>-</sup> | Bu <sub>4</sub> NOMs                             | 5   | MeCN | 50 | 5   |
| 408 | QMA | HCO <sub>3</sub> <sup>-</sup> | Bu <sub>4</sub> NOMs                             | 100 | none | 0  | 98  |
| 409 | QMA | HCO <sub>3</sub> <sup>-</sup> | Bu <sub>4</sub> NOMs                             | 75  | none | 0  | 99  |
| 410 | QMA | HCO <sub>3</sub> <sup>-</sup> | Bu <sub>4</sub> NOMs                             | 50  | none | 0  | 98  |
| 411 | QMA | HCO <sub>3</sub> <sup>-</sup> | Bu <sub>4</sub> NOMs                             | 33  | none | 0  | 99  |
| 412 | QMA | HCO <sub>3</sub> <sup>-</sup> | Bu <sub>4</sub> NOMs                             | 25  | none | 0  | 95  |
| 413 | QMA | HCO <sub>3</sub> <sup>-</sup> | Bu <sub>4</sub> NOMs                             | 10  | none | 0  | 73  |
| 414 | QMA | HCO <sub>3</sub> <sup>-</sup> | Bu <sub>4</sub> NOMs                             | 5   | none | 0  | 6   |
| 415 | QMA | Cl <sup>-</sup>               | Bu <sub>4</sub> NOMs                             | 100 | none | 0  | 98  |
| 416 | QMA | Cl <sup>-</sup>               | Bu <sub>4</sub> NOMs                             | 75  | none | 0  | 97  |
| 417 | QMA | Cl <sup>-</sup>               | Bu <sub>4</sub> NOMs                             | 50  | none | 0  | 95  |
| 418 | QMA | Cl <sup>-</sup>               | Bu <sub>4</sub> NOMs                             | 33  | none | 0  | 92  |
| 419 | QMA | Cl <sup>-</sup>               | Bu <sub>4</sub> NOMs                             | 25  | none | 0  | 84  |
| 420 | QMA | Cl <sup>-</sup>               | Bu <sub>4</sub> NOMs                             | 10  | none | 0  | 23  |
| 421 | QMA | Cl <sup>-</sup>               | Bu <sub>4</sub> NOMs                             | 5   | none | 0  | 0   |
| 422 | QMA | HCO <sub>3</sub> <sup>-</sup> | Bu <sub>4</sub> NOMs                             | 100 | MeCN | 90 | 37  |
| 423 | QMA | HCO <sub>3</sub> <sup>-</sup> | Bu <sub>4</sub> NOMs                             | 75  | MeCN | 90 | 55  |
| 424 | QMA | HCO <sub>3</sub> <sup>-</sup> | Bu <sub>4</sub> NOMs                             | 50  | MeCN | 90 | 38  |



|     |     |                               |                      |     |      |    |     |
|-----|-----|-------------------------------|----------------------|-----|------|----|-----|
| 425 | QMA | HCO <sub>3</sub> <sup>-</sup> | Bu <sub>4</sub> NOMs | 33  | MeCN | 90 | 4   |
| 426 | QMA | HCO <sub>3</sub> <sup>-</sup> | Bu <sub>4</sub> NOMs | 25  | MeCN | 90 | 36  |
| 427 | QMA | HCO <sub>3</sub> <sup>-</sup> | Bu <sub>4</sub> NOMs | 10  | MeCN | 90 | 1   |
| 428 | QMA | HCO <sub>3</sub> <sup>-</sup> | Bu <sub>4</sub> NOMs | 5   | MeCN | 90 | 2   |
| 429 | QMA | Cl <sup>-</sup>               | Bu <sub>4</sub> NOMs | 100 | MeCN | 90 | 3   |
| 430 | QMA | Cl <sup>-</sup>               | Bu <sub>4</sub> NOMs | 75  | MeCN | 90 | 1   |
| 431 | QMA | Cl <sup>-</sup>               | Bu <sub>4</sub> NOMs | 50  | MeCN | 90 | 1   |
| 432 | QMA | Cl <sup>-</sup>               | Bu <sub>4</sub> NOMs | 33  | MeCN | 90 | 1   |
| 433 | QMA | Cl <sup>-</sup>               | Bu <sub>4</sub> NOMs | 25  | MeCN | 90 | 2   |
| 434 | QMA | Cl <sup>-</sup>               | Bu <sub>4</sub> NOMs | 10  | MeCN | 90 | -1  |
| 435 | QMA | Cl <sup>-</sup>               | Bu <sub>4</sub> NOMs | 5   | MeCN | 90 | 1   |
| 436 | QMA | HCO <sub>3</sub> <sup>-</sup> | KOTf                 | 100 | none | 0  | 100 |
| 437 | QMA | HCO <sub>3</sub> <sup>-</sup> | KOTf                 | 20  | none | 0  | 96  |
| 438 | QMA | HCO <sub>3</sub> <sup>-</sup> | KOTf                 | 10  | none | 0  | 51  |
| 439 | QMA | HCO <sub>3</sub> <sup>-</sup> | KOTf                 | 5   | none | 0  | 27  |
| 440 | QMA | Cl <sup>-</sup>               | KOTf                 | 5   | none | 0  | 14  |
| 441 | QMA | Cl <sup>-</sup>               | KOTf                 | 10  | none | 0  | 35  |
| 442 | QMA | Cl <sup>-</sup>               | KOTf                 | 20  | none | 0  | 87  |
| 443 | QMA | Cl <sup>-</sup>               | KOTf                 | 33  | none | 0  | 98  |
| 444 | QMA | Cl <sup>-</sup>               | KOTf                 | 50  | none | 0  | 99  |
| 445 | QMA | Cl <sup>-</sup>               | KOTf                 | 75  | none | 0  | 100 |
| 446 | QMA | Cl <sup>-</sup>               | KOTf                 | 100 | none | 0  | 99  |
| 447 | QMA | HCO <sub>3</sub> <sup>-</sup> | KOTf                 | 5   | none | 0  | 21  |
| 448 | QMA | HCO <sub>3</sub> <sup>-</sup> | KOTf                 | 10  | none | 0  | 42  |
| 449 | QMA | HCO <sub>3</sub> <sup>-</sup> | KOTf                 | 20  | none | 0  | 96  |
| 450 | QMA | HCO <sub>3</sub> <sup>-</sup> | KOTf                 | 33  | none | 0  | 99  |
| 451 | QMA | HCO <sub>3</sub> <sup>-</sup> | KOTf                 | 50  | none | 0  | 100 |
| 452 | QMA | HCO <sub>3</sub> <sup>-</sup> | KOTf                 | 75  | none | 0  | 100 |
| 453 | QMA | HCO <sub>3</sub> <sup>-</sup> | KOTf                 | 100 | none | 0  | 100 |
| 454 | QMA | HCO <sub>3</sub> <sup>-</sup> | KOTf                 | 5   | MeCN | 50 | 10  |
| 455 | QMA | HCO <sub>3</sub> <sup>-</sup> | KOTf                 | 10  | MeCN | 50 | 35  |
| 456 | QMA | HCO <sub>3</sub> <sup>-</sup> | KOTf                 | 20  | MeCN | 50 | 73  |
| 457 | QMA | HCO <sub>3</sub> <sup>-</sup> | KOTf                 | 33  | MeCN | 50 | 93  |
| 458 | QMA | HCO <sub>3</sub> <sup>-</sup> | KOTf                 | 50  | MeCN | 50 | 98  |
| 459 | QMA | HCO <sub>3</sub> <sup>-</sup> | KOTf                 | 75  | MeCN | 50 | 99  |
| 460 | QMA | HCO <sub>3</sub> <sup>-</sup> | KOTf                 | 100 | MeCN | 50 | 100 |
| 461 | QMA | HCO <sub>3</sub> <sup>-</sup> | KOTf                 | 5   | MeCN | 90 | 3   |
| 462 | QMA | HCO <sub>3</sub> <sup>-</sup> | KOTf                 | 10  | MeCN | 90 | 1   |
| 463 | QMA | HCO <sub>3</sub> <sup>-</sup> | KOTf                 | 20  | MeCN | 90 | 5   |
| 464 | QMA | HCO <sub>3</sub> <sup>-</sup> | KOTf                 | 100 | MeCN | 90 | 3   |
| 465 | QMA | HCO <sub>3</sub> <sup>-</sup> | KOTf                 | 200 | MeCN | 90 | 3   |
| 466 | QMA | Cl <sup>-</sup>               | KOTf                 | 5   | MeCN | 90 | 2   |
| 467 | QMA | Cl <sup>-</sup>               | KOTf                 | 100 | MeCN | 90 | 1   |
| 468 | QMA | Cl <sup>-</sup>               | KOTf                 | 200 | MeCN | 90 | 3   |
| 469 | QMA | HCO <sub>3</sub> <sup>-</sup> | KOTf/18C6            | 20  | MeCN | 50 | 66  |
| 470 | QMA | HCO <sub>3</sub> <sup>-</sup> | KOTf/18C6            | 50  | MeCN | 50 | 77  |
| 471 | QMA | HCO <sub>3</sub> <sup>-</sup> | KOTf/18C6            | 100 | MeCN | 50 | 98  |
| 472 | QMA | HCO <sub>3</sub> <sup>-</sup> | KOTf/18C6            | 20  | MeCN | 90 | 2   |
| 473 | QMA | HCO <sub>3</sub> <sup>-</sup> | KOTf/18C6            | 50  | MeCN | 90 | 5   |
| 474 | QMA | HCO <sub>3</sub> <sup>-</sup> | KOTf/18C6            | 100 | MeCN | 90 | 19  |

## Screening and cold testing

### Initial radiolabeling tests

Initial radiolabeling reactions comparing eluting bases from different classes of anions (standard, volatile and neutral). Reactions were performed according to the general method for manual radiolabeling experiments.

**Table S2** Results from initial radiolabeling reactions comparing different eluting compounds for HCO<sub>3</sub><sup>-</sup> and Cl<sup>-</sup> preconditioned QMA with MeCN as a reaction solvent.

| Initial radiolabeling tests |                |                                                  |                                  |                               |                      |                      |                          |                                  |
|-----------------------------|----------------|--------------------------------------------------|----------------------------------|-------------------------------|----------------------|----------------------|--------------------------|----------------------------------|
| Exp id                      | Type of sample | Eluting anion                                    | Concentration eluting anion (mM) | Preconditioning anion         | Expected elution (%) | Observed elution (%) | [ <sup>18</sup> F]-3 (%) | [ <sup>18</sup> F]F <sup>-</sup> |
| 1                           | Crude          | K <sub>2</sub> CO <sub>3</sub> /K <sub>222</sub> | 40                               | Cl <sup>-</sup>               | 100                  | 99                   | 67.3                     | 25.4                             |
| 2                           | Resolubilized  | K <sub>2</sub> CO <sub>3</sub> /K <sub>222</sub> | 40                               | Cl <sup>-</sup>               | 100                  | 99                   | 58.8                     | 35.6                             |
| 3                           | Crude          | K <sub>2</sub> CO <sub>3</sub> /K <sub>222</sub> | 30                               | Cl <sup>-</sup>               | 90                   | 99                   | 61.2                     | 33.1                             |
| 4                           | Resolubilized  | K <sub>2</sub> CO <sub>3</sub> /K <sub>222</sub> | 30                               | Cl <sup>-</sup>               | 90                   | 99                   | 38.8                     | 56.9                             |
| 5                           | Crude          | K <sub>2</sub> CO <sub>3</sub> /K <sub>222</sub> | 10                               | Cl <sup>-</sup>               | 50                   | 44                   | 5.4                      | 90.3                             |
| 6                           | Resolubilized  | K <sub>2</sub> CO <sub>3</sub> /K <sub>222</sub> | 10                               | Cl <sup>-</sup>               | 50                   | 44                   | 3.9                      | 91.2                             |
| 7                           | Crude          | K <sub>2</sub> CO <sub>3</sub> /K <sub>222</sub> | 7                                | Cl <sup>-</sup>               | 20                   | 8                    | 0.2                      | 98.1                             |
| 8                           | Resolubilized  | K <sub>2</sub> CO <sub>3</sub> /K <sub>222</sub> | 7                                | Cl <sup>-</sup>               | 20                   | 8                    | 0.4                      | 97.5                             |
| 9                           | Crude          | K <sub>2</sub> CO <sub>3</sub> /K <sub>222</sub> | 10                               | HCO <sub>3</sub> <sup>-</sup> | 90                   | 95                   | 66.8                     | 21.2                             |
| 10                          | Resolubilized  | K <sub>2</sub> CO <sub>3</sub> /K <sub>222</sub> | 10                               | HCO <sub>3</sub> <sup>-</sup> | 90                   | 95                   | 49.3                     | 41.5                             |
| 11                          | Crude          | K <sub>2</sub> CO <sub>3</sub> /K <sub>222</sub> | 10                               | HCO <sub>3</sub> <sup>-</sup> | 90                   | 100                  | 71                       | 21.8                             |
| 12                          | Resolubilized  | K <sub>2</sub> CO <sub>3</sub> /K <sub>222</sub> | 10                               | HCO <sub>3</sub> <sup>-</sup> | 90                   | 100                  | 48.3                     | 46.8                             |
| 13                          | Crude          | K <sub>2</sub> CO <sub>3</sub> /K <sub>222</sub> | 5                                | HCO <sub>3</sub> <sup>-</sup> | 50                   | 58                   | 65                       | 26.3                             |
| 14                          | Resolubilized  | K <sub>2</sub> CO <sub>3</sub> /K <sub>222</sub> | 5                                | HCO <sub>3</sub> <sup>-</sup> | 50                   | 58                   | 34.7                     | 59.7                             |
| 15                          | Crude          | K <sub>2</sub> CO <sub>3</sub> /K <sub>222</sub> | 2                                | HCO <sub>3</sub> <sup>-</sup> | 20                   | 10                   | 59.9                     | 29.6                             |
| 16                          | Resolubilized  | K <sub>2</sub> CO <sub>3</sub> /K <sub>222</sub> | 2                                | HCO <sub>3</sub> <sup>-</sup> | 20                   | 10                   | 26.7                     | 68.6                             |
| 17                          | Crude          | K <sub>2</sub> CO <sub>3</sub> /K <sub>222</sub> | 2                                | HCO <sub>3</sub> <sup>-</sup> | 20                   | 4                    | 21.5                     | 69.7                             |
| 18                          | Resolubilized  | K <sub>2</sub> CO <sub>3</sub> /K <sub>222</sub> | 2                                | HCO <sub>3</sub> <sup>-</sup> | 20                   | 4                    | 6                        | 90.3                             |
| 19                          | Crude          | Et <sub>3</sub> N                                | 200                              | Cl <sup>-</sup>               | 40                   | 4                    | 0                        | 96.9                             |
| 20                          | Resolubilized  | Et <sub>3</sub> N                                | 200                              | Cl <sup>-</sup>               | 40                   | 4                    | 0                        | 97.8                             |
| 21                          | Crude          | Et <sub>3</sub> N                                | 20                               | Cl <sup>-</sup>               | 20                   | 1                    | 0                        | 95.6                             |
| 22                          | Resolubilized  | Et <sub>3</sub> N                                | 20                               | Cl <sup>-</sup>               | 20                   | 1                    | 0                        | 95.7                             |
| 23                          | Crude          | Et <sub>3</sub> N                                | 30                               | HCO <sub>3</sub> <sup>-</sup> | 90                   | 96                   | 0                        | 97.6                             |
| 24                          | Resolubilized  | Et <sub>3</sub> N                                | 30                               | HCO <sub>3</sub> <sup>-</sup> | 90                   | 96                   | 0                        | 98                               |
| 25                          | Crude          | Et <sub>3</sub> N                                | 6                                | HCO <sub>3</sub> <sup>-</sup> | 10                   | 9                    | 0                        | 97.9                             |
| 26                          | Resolubilized  | Et <sub>3</sub> N                                | 6                                | HCO <sub>3</sub> <sup>-</sup> | 10                   | 9                    | 0                        | 97.6                             |
| 27                          | Crude          | Bu <sub>4</sub> NOMs                             | 50                               | Cl <sup>-</sup>               | 50                   | 89                   | 0.1                      | 96.7                             |
| 28                          | Resolubilized  | Bu <sub>4</sub> NOMs                             | 50                               | Cl <sup>-</sup>               | 50                   | 89                   | 0.1                      | 96.1                             |
| 29                          | Crude          | Bu <sub>4</sub> NOMs                             | 20                               | Cl <sup>-</sup>               | 20                   | 24                   | 0                        | 97.3                             |
| 30                          | Resolubilized  | Bu <sub>4</sub> NOMs                             | 20                               | Cl <sup>-</sup>               | 20                   | 24                   | 0                        | 96.9                             |
| 31                          | Crude          | Bu <sub>4</sub> NOMs                             | 30                               | HCO <sub>3</sub> <sup>-</sup> | 100                  | 98                   | 63.5                     | 27.1                             |
| 32                          | Resolubilized  | Bu <sub>4</sub> NOMs                             | 30                               | HCO <sub>3</sub> <sup>-</sup> | 100                  | 98                   | 53.5                     | 37.2                             |
| 33                          | Crude          | Bu <sub>4</sub> NOMs                             | 20                               | HCO <sub>3</sub> <sup>-</sup> | 90                   | 92                   | 65.7                     | 21.2                             |
| 34                          | Resolubilized  | Bu <sub>4</sub> NOMs                             | 20                               | HCO <sub>3</sub> <sup>-</sup> | 90                   | 92                   | 51.7                     | 30                               |
| 35                          | Crude          | Bu <sub>4</sub> NOMs                             | 15                               | HCO <sub>3</sub> <sup>-</sup> | 50                   | 82                   | 60.3                     | 27.5                             |
| 36                          | Resolubilized  | Bu <sub>4</sub> NOMs                             | 15                               | HCO <sub>3</sub> <sup>-</sup> | 50                   | 82                   | 51.8                     | 36.2                             |
| 37                          | Crude          | Bu <sub>4</sub> NOMs                             | 6                                | HCO <sub>3</sub> <sup>-</sup> | 20                   | 22                   | 62.4                     | 30.7                             |
| 38                          | Resolubilized  | Bu <sub>4</sub> NOMs                             | 6                                | HCO <sub>3</sub> <sup>-</sup> | 20                   | 22                   | 52.7                     | 39.8                             |

|    |               |       |    |                               |     |    |     |      |
|----|---------------|-------|----|-------------------------------|-----|----|-----|------|
| 39 | Crude         | DIPEA | 50 | HCO <sub>3</sub> <sup>-</sup> | 95  | 96 | 0   | 97.3 |
| 40 | Resolubilized | DIPEA | 50 | HCO <sub>3</sub> <sup>-</sup> | 95  | 96 | 0.2 | 97.1 |
| 41 | Crude         | DIPEA | 30 | HCO <sub>3</sub> <sup>-</sup> | 90  | 94 | 0.2 | 97.5 |
| 42 | Resolubilized | DIPEA | 30 | HCO <sub>3</sub> <sup>-</sup> | 90  | 94 | 0.2 | 97.4 |
| 43 | Crude         | DBU   | 10 | HCO <sub>3</sub> <sup>-</sup> | 100 | 81 | 0   | 96.4 |
| 44 | Resolubilized | DBU   | 10 | HCO <sub>3</sub> <sup>-</sup> | 100 | 81 | 0   | 97.1 |
| 45 | Crude         | DBU   | 5  | HCO <sub>3</sub> <sup>-</sup> | 90  | 20 | 0   | 96.5 |
| 46 | Resolubilized | DBU   | 5  | HCO <sub>3</sub> <sup>-</sup> | 90  | 20 | 0   | 98.1 |

### Comparison of UV-trace from crude reactions for reactions using Cl<sup>-</sup> preconditioned QMA

Samples were taken from different reactions (entry 6, 32 and 36) and the retention time on the analytical HPLC was compared to confirm the formation of chlorinated precursor **7b** when using Cl<sup>-</sup> preconditioned QMAs, *Figure S3*.

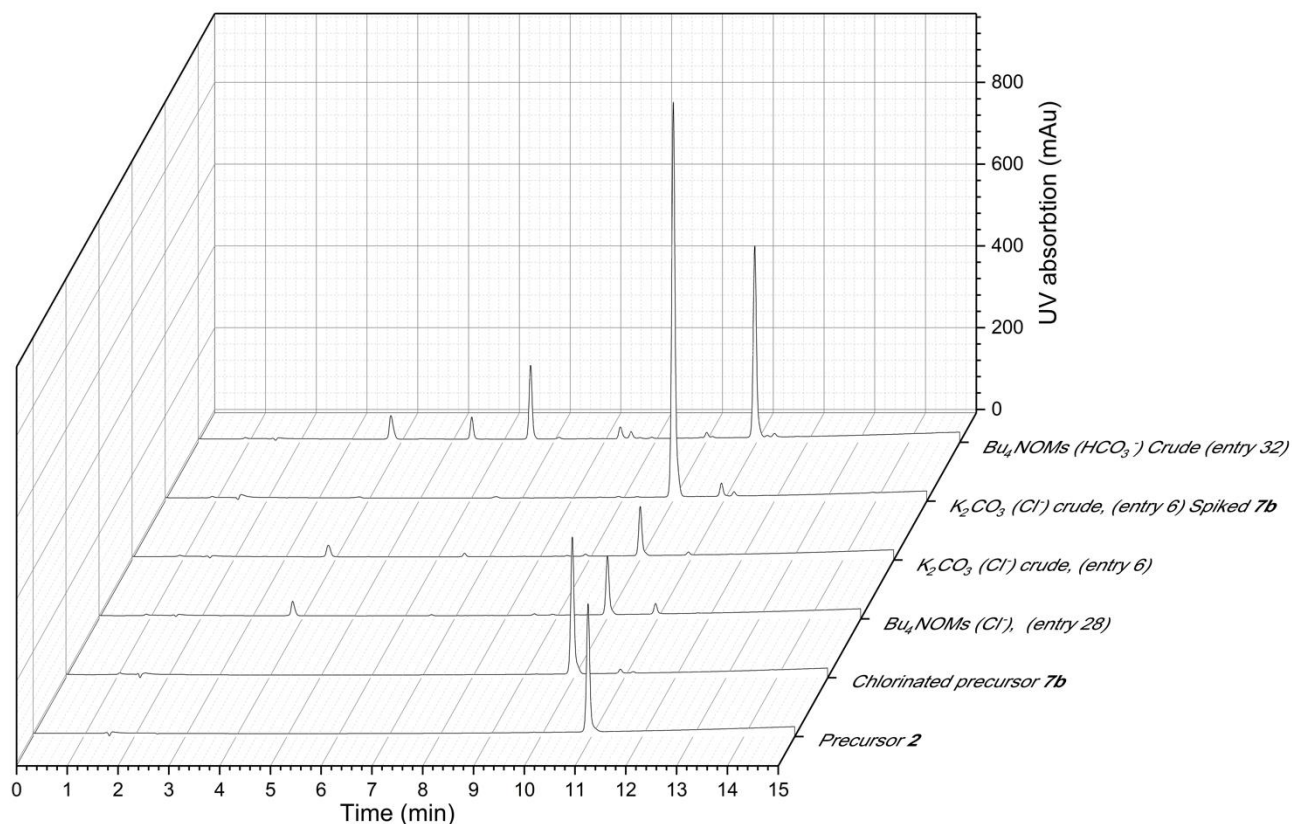

**Figure S3** Chromatogram from analytical HPLC analysis (UV absorption, 254 nm) of reaction crudes for Cl<sup>-</sup> preconditioned QMA, reference compounds or a reference reaction using a HCO<sub>3</sub><sup>-</sup> preconditioned QMA eluted with Bu<sub>4</sub>NOMs.

## Non-basic elution of non-basic preconditioned QMA

Reactions were conducted according to the general procedure for manual radiolabeling experiments.

**Table S3** Results from OMs<sup>-</sup> and SO<sub>4</sub><sup>2-</sup> preconditioned QMAs eluted with Bu<sub>4</sub>NOMs or (Bu<sub>4</sub>N)<sub>2</sub>SO<sub>4</sub> with MeCN used as a reaction solvent.

| Non-basic elutions with non-basic preconditioning |                |                                                  |                                  |                               |                      |                      |                          |                                  |
|---------------------------------------------------|----------------|--------------------------------------------------|----------------------------------|-------------------------------|----------------------|----------------------|--------------------------|----------------------------------|
| Exp id                                            | Type of sample | Eluting anion                                    | Concentration eluting anion (mM) | Preconditioning anion         | Expected elution (%) | Observed elution (%) | [ <sup>18</sup> F]-3 (%) | [ <sup>18</sup> F]F <sup>-</sup> |
| 47                                                | Crude          | (Bu <sub>4</sub> N) <sub>2</sub> SO <sub>4</sub> | 10                               | SO <sub>4</sub> <sup>2-</sup> | 90                   | 83                   | 0                        | 100                              |
| 48                                                | Resolubilized  | (Bu <sub>4</sub> N) <sub>2</sub> SO <sub>4</sub> | 10                               | SO <sub>4</sub> <sup>2-</sup> | 90                   | 83                   | 0                        | 100                              |
| 49                                                | Crude          | (Bu <sub>4</sub> N) <sub>2</sub> SO <sub>4</sub> | 6                                | SO <sub>4</sub> <sup>2-</sup> | 85                   | 85                   | 0                        | 100                              |
| 50                                                | Resolubilized  | (Bu <sub>4</sub> N) <sub>2</sub> SO <sub>4</sub> | 6                                | SO <sub>4</sub> <sup>2-</sup> | 85                   | 85                   | 0                        | 100                              |
| 51                                                | Crude          | Bu <sub>4</sub> NOMs                             | 20                               | SO <sub>4</sub> <sup>2-</sup> | 90                   | 96                   | 0                        | 100                              |
| 52                                                | Resolubilized  | Bu <sub>4</sub> NOMs                             | 20                               | SO <sub>4</sub> <sup>2-</sup> | 90                   | 96                   | 0                        | 100                              |
| 53                                                | Crude          | Bu <sub>4</sub> NOMs                             | 6                                | SO <sub>4</sub> <sup>2-</sup> | 10                   | 95                   | 0                        | 100                              |
| 54                                                | Resolubilized  | Bu <sub>4</sub> NOMs                             | 6                                | SO <sub>4</sub> <sup>2-</sup> | 10                   | 95                   | 0                        | 100                              |
| 55                                                | Crude          | (Bu <sub>4</sub> N) <sub>2</sub> SO <sub>4</sub> | 10                               | OMs <sup>-</sup>              | 90                   | 82                   | 0                        | 100                              |
| 56                                                | Resolubilized  | (Bu <sub>4</sub> N) <sub>2</sub> SO <sub>4</sub> | 10                               | OMs <sup>-</sup>              | 90                   | 82                   | 0                        | 100                              |
| 57                                                | Crude          | (Bu <sub>4</sub> N) <sub>2</sub> SO <sub>4</sub> | 6                                | OMs <sup>-</sup>              | 85                   | 38                   | 0                        | 100                              |
| 58                                                | Resolubilized  | (Bu <sub>4</sub> N) <sub>2</sub> SO <sub>4</sub> | 6                                | OMs <sup>-</sup>              | 85                   | 38                   | 0                        | 100                              |
| 59                                                | Crude          | Bu <sub>4</sub> NOMs                             | 6                                | OMs <sup>-</sup>              | 10                   | 0                    | 0                        | 100                              |
| 60                                                | Resolubilized  | Bu <sub>4</sub> NOMs                             | 6                                | OMs <sup>-</sup>              | 10                   | 0                    | 0                        | 100                              |
| 61                                                | Crude          | Bu <sub>4</sub> NOMs                             | 200                              | OMs <sup>-</sup>              | 100                  | 98                   | 1.1                      | 98.2                             |
| 62                                                | Resolubilized  | Bu <sub>4</sub> NOMs                             | 200                              | OMs <sup>-</sup>              | 100                  | 98                   | 0.7                      | 95.7                             |
| 63                                                | Crude          | Bu <sub>4</sub> NOMs                             | 20                               | OMs <sup>-</sup>              | 30                   | 25                   | 5.6                      | 60.4                             |
| 64                                                | Resolubilized  | Bu <sub>4</sub> NOMs                             | 20                               | OMs <sup>-</sup>              | 30                   | 25                   | 1.2                      | 90.5                             |
| 65                                                | Crude          | K <sub>2</sub> SO <sub>4</sub> /K <sub>222</sub> | 10                               | SO <sub>4</sub> <sup>2-</sup> | 90                   | 96                   | 3                        | 88.6                             |
| 66                                                | Resolubilized  | K <sub>2</sub> SO <sub>4</sub> /K <sub>222</sub> | 10                               | SO <sub>4</sub> <sup>2-</sup> | 90                   | 96                   | 0.9                      | 95.9                             |

## Secondary addition of base to a non-basic preconditioning and elution

Reactions were performed according to the general method for manual radiolabeling reactions using **2** to yield [<sup>18</sup>F]**3** with a few exceptions. According to the method described by Lee *et al.* a the QMA was preconditioned using KOMs (0.2 M, 10 mL).<sup>5</sup> The QMA was then eluted using either Bu<sub>4</sub>NOMs (1 mL, 30-50 mM, MeCN/H<sub>2</sub>O, 50:50) or KOMs/K<sub>222</sub> (0.7 mL, 25/50 mM, MeOH). To the reaction vial potassium bicarbonate, -carbonate or hydroxide dissolved in H<sub>2</sub>O was added from a stock solution to give a range of concentrations. The resulting mixture was then dried azeotropically according to the general method for manual radiolabeling. The results from the reaction are presented in *Table S4*.

**Table S4** Results from radiolabeling experiments using secondary addition of base

| KOMs preconditioning Bu <sub>4</sub> NOMs elution (50 mM) with addition of base |                |                                       |        |                                 |                                  |
|---------------------------------------------------------------------------------|----------------|---------------------------------------|--------|---------------------------------|----------------------------------|
| Exp id                                                                          | Type of sample | Concentration and type of base added  | EE (%) | [ <sup>18</sup> F] <b>3</b> (%) | [ <sup>18</sup> F]F <sup>-</sup> |
| 67                                                                              | Crude          | 1 μmol KHCO <sub>3</sub>              | 96     | 0                               | 97.3                             |
| 68                                                                              | Resolubilized  | 1 μmol KHCO <sub>3</sub>              | 96     | 0                               | 98.5                             |
| 69                                                                              | Crude          | 5 μmol KHCO <sub>3</sub>              | 92     | 13.2                            | 75.6                             |
| 70                                                                              | Resolubilized  | 5 μmol KHCO <sub>3</sub>              | 92     | 1                               | 97.3                             |
| 71                                                                              | Crude          | 10 μmol KHCO <sub>3</sub>             | 97     | 11.3                            | 81.8                             |
| 72                                                                              | Resolubilized  | 10 μmol KHCO <sub>3</sub>             | 97     | 1.9                             | 96.3                             |
| 73                                                                              | Crude          | 1 μmol K <sub>2</sub> CO <sub>3</sub> | 91     | 12.7                            | 82.9                             |
| 74                                                                              | Resolubilized  | 1 μmol K <sub>2</sub> CO <sub>3</sub> | 91     | 7.3                             | 90.4                             |

|                                                             |               |                                                      |    |      |      |
|-------------------------------------------------------------|---------------|------------------------------------------------------|----|------|------|
| 75                                                          | Crude         | 5 $\mu\text{mol}$ $\text{K}_2\text{CO}_3$            | 97 | 16   | 72.9 |
| 76                                                          | Resolubilized | 5 $\mu\text{mol}$ $\text{K}_2\text{CO}_3$            | 97 | 2    | 95.9 |
| 77                                                          | Crude         | 10 $\mu\text{mol}$ $\text{K}_2\text{CO}_3$           | 95 | 23.3 | 68.2 |
| 78                                                          | Resolubilized | 10 $\mu\text{mol}$ $\text{K}_2\text{CO}_3$           | 95 | 3.6  | 94.7 |
| <b>Elution by 30 mM <math>\text{Bu}_4\text{NOMs}</math></b> |               |                                                      |    |      |      |
| 79                                                          | Crude         | 1 $\mu\text{mol}$ $\text{KHCO}_3$                    | 25 | 5.6  | 60.4 |
| 80                                                          | Resolubilized | 1 $\mu\text{mol}$ $\text{KHCO}_3$                    | 25 | 1.2  | 90.5 |
| <b>Elution by 25 mM KOMs/<math>\text{K}_{222}</math></b>    |               |                                                      |    |      |      |
| 81                                                          | Crude         | 7.8 $\mu\text{mol}$ $\text{KOH}$                     | 92 | 90.4 | 3.8  |
| 82                                                          | Resolubilized | 7.8 $\mu\text{mol}$ $\text{KOH}$                     | 92 | 74.2 | 19.9 |
| 83                                                          | Crude         | 7.8 $\mu\text{mol}$ $\text{K}_2\text{CO}_3$          | 90 | 92.7 | 2.5  |
| 84                                                          | Resolubilized | 7.8 $\mu\text{mol}$ $\text{K}_2\text{CO}_3$          | 90 | 64.8 | 28.4 |
| 85                                                          | Crude         | 7.8 $\mu\text{mol}$ $\text{KHCO}_3$                  | 87 | 70.2 | 22.2 |
| 86                                                          | Resolubilized | 7.8 $\mu\text{mol}$ $\text{KHCO}_3$                  | 87 | 57.5 | 36.9 |
| 87                                                          | Crude         | 3.9 $\mu\text{mol}$ $\text{KOH}$                     | 90 | 83.6 | 9.4  |
| 88                                                          | Resolubilized | 3.9 $\mu\text{mol}$ $\text{KOH}$                     | 90 | 73.8 | 20.6 |
| 89                                                          | Crude         | 3.9 $\mu\text{mol}$ $\text{KHCO}_3$                  | 88 | 89.2 | 7.5  |
| 90                                                          | Resolubilized | 3.9 $\mu\text{mol}$ $\text{KHCO}_3$                  | 88 | 59.6 | 34.4 |
| 91                                                          | Crude         | 3.9 $\mu\text{mol}$ $\text{KHCO}_3$ (with stirring)  | 86 | 62.9 | 28.5 |
| 92                                                          | Resolubilized | 3.9 $\mu\text{mol}$ $\text{KHCO}_3$ (with stirring)  | 86 | 23.4 | 70.3 |
| 93                                                          | Crude         | 1.85 $\mu\text{mol}$ $\text{KOH}$                    | 92 | 71.8 | 14.1 |
| 94                                                          | Resolubilized | 1.85 $\mu\text{mol}$ $\text{KOH}$                    | 92 | 56.8 | 33.5 |
| 95                                                          | Crude         | 1.85 $\mu\text{mol}$ $\text{KHCO}_3$                 | 86 | 74.5 | 18.0 |
| 96                                                          | Resolubilized | 1.85 $\mu\text{mol}$ $\text{KHCO}_3$                 | 86 | 37.6 | 56.0 |
| 97                                                          | Crude         | 1.85 $\mu\text{mol}$ $\text{KHCO}_3$ (with stirring) | 82 | 33.4 | 68.8 |
| 98                                                          | Resolubilized | 1.85 $\mu\text{mol}$ $\text{KHCO}_3$ (with stirring) | 82 | 21.8 | 77.0 |

Using lower concentrations of added base resulted in lower and lower pRCY. This was due to a higher amount of [ $^{18}\text{F}$ ]fluoride adsorbing to the glass vessel walls. This was especially pronounced for the less basic  $\text{KHCO}_3$  compared to  $\text{KOH}$  indicating that this method is not suitable for low-base conditions (*Figure S4*). Performing the same reactions with stirring did not improve the fluorination efficiency (*Table S4*).

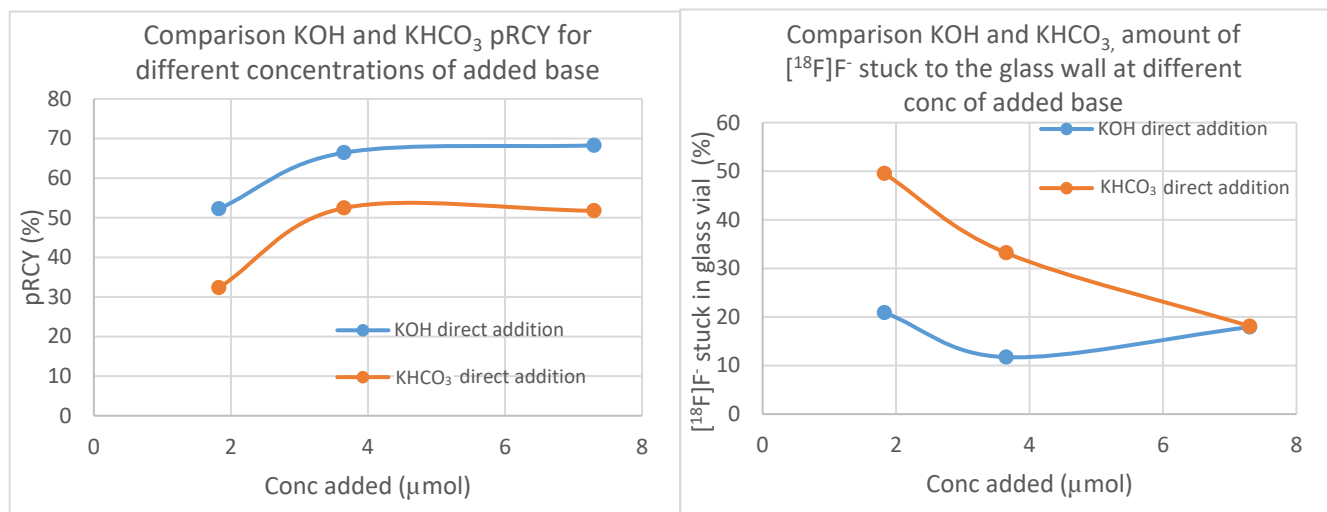

**Figure S4** pRCY for reactions preconditioned with KOMs and eluted with KOMs/K<sub>222</sub> and different concentrations of base added to the eluate (left). Quantification of amount of [<sup>18</sup>F]F<sup>-</sup> stuck to the glass wall at the end of the reaction after direct addition of base to the eluate (right).

### Screening preconditioning anions of different pK<sub>a</sub> and valency

Screening of different preconditioning anions with Bu<sub>4</sub>NOMs (20 mM) used for elution and MeCN as the reaction solvent. Reactions were conducted according to the general method for manual radiolabeling reactions.

**Table S5.** Results for screening of different preconditioning anions with non-basic elution using Bu<sub>4</sub>NOMs.

| Screening of precondition anions with increasing pK <sub>a</sub> using Bu <sub>4</sub> NOMs elution |                |                      |                                  |                                             |                      |                      |                          |                                  |
|-----------------------------------------------------------------------------------------------------|----------------|----------------------|----------------------------------|---------------------------------------------|----------------------|----------------------|--------------------------|----------------------------------|
| Exp id                                                                                              | Type of sample | Eluting anion        | Concentration eluting anion (mM) | Preconditioning anion                       | Expected elution (%) | Observed elution (%) | [ <sup>18</sup> F]-3 (%) | [ <sup>18</sup> F]F <sup>-</sup> |
| 29                                                                                                  | Crude          | Bu <sub>4</sub> NOMs | 20                               | Cl <sup>-</sup>                             | 20                   | 24                   | 0                        | 97.3                             |
| 30                                                                                                  | Resolubilized  | Bu <sub>4</sub> NOMs | 20                               | Cl <sup>-</sup>                             | 20                   | 24                   | 0                        | 96.9                             |
| 63                                                                                                  | Crude          | Bu <sub>4</sub> NOMs | 20                               | OMs <sup>-</sup>                            | 30                   | 28                   | 3.2                      | 96.8                             |
| 64                                                                                                  | Resolubilized  | Bu <sub>4</sub> NOMs | 20                               | OMs <sup>-</sup>                            | 30                   | 28                   | 3.1                      | 96.7                             |
| 51                                                                                                  | Crude          | Bu <sub>4</sub> NOMs | 20                               | SO <sub>4</sub> <sup>-2</sup>               | 90                   | 96                   | 0                        | 100                              |
| 52                                                                                                  | Resolubilized  | Bu <sub>4</sub> NOMs | 20                               | SO <sub>4</sub> <sup>-2</sup>               | 90                   | 96                   | 0                        | 100                              |
| 99                                                                                                  | Crude          | Bu <sub>4</sub> NOMs | 20                               | H <sub>2</sub> PO <sub>4</sub> <sup>-</sup> | 90                   | 86                   | 0                        | 95.2                             |
| 100                                                                                                 | Resolubilized  | Bu <sub>4</sub> NOMs | 20                               | H <sub>2</sub> PO <sub>4</sub> <sup>-</sup> | 90                   | 86                   | 0                        | 94.4                             |
| 101                                                                                                 | Crude          | Bu <sub>4</sub> NOMs | 20                               | C <sub>2</sub> O <sub>4</sub> <sup>2-</sup> | 90                   | 99                   | 6.7                      | 85.1                             |
| 102                                                                                                 | Resolubilized  | Bu <sub>4</sub> NOMs | 20                               | C <sub>2</sub> O <sub>4</sub> <sup>2-</sup> | 90                   | 99                   | 4.4                      | 87                               |
| 103                                                                                                 | Crude          | Bu <sub>4</sub> NOMs | 20                               | AcO <sup>-</sup>                            | 50                   | 45                   | 0.8                      | 90.1                             |
| 104                                                                                                 | Resolubilized  | Bu <sub>4</sub> NOMs | 20                               | AcO <sup>-</sup>                            | 50                   | 45                   | 0.9                      | 88.5                             |
| 105                                                                                                 | Crude          | Bu <sub>4</sub> NOMs | 20                               | HCO <sub>3</sub> <sup>-</sup>               | 90                   | 98                   | 63.5                     | 27.1                             |
| 106                                                                                                 | Resolubilized  | Bu <sub>4</sub> NOMs | 20                               | HCO <sub>3</sub> <sup>-</sup>               | 90                   | 98                   | 53.5                     | 37.2                             |
| 107                                                                                                 | Crude          | Bu <sub>4</sub> NOMs | 20                               | HCO <sub>3</sub> <sup>-</sup>               | 90                   | 85                   | 75.9                     | 18.4                             |
| 108                                                                                                 | Resolubilized  | Bu <sub>4</sub> NOMs | 20                               | HCO <sub>3</sub> <sup>-</sup>               | 90                   | 85                   | 71                       | 23.5                             |
| 109                                                                                                 | Crude          | Bu <sub>4</sub> NOMs | 20                               | HCO <sub>3</sub> <sup>-</sup>               | 100                  | 90                   | 52.6                     | 43.2                             |
| 110                                                                                                 | Resolubilized  | Bu <sub>4</sub> NOMs | 20                               | HCO <sub>3</sub> <sup>-</sup>               | 100                  | 90                   | 48.3                     | 46.6                             |
| 111                                                                                                 | Crude          | Bu <sub>4</sub> NOMs | 20                               | HPO <sub>4</sub> <sup>2-</sup>              | 100                  | 95                   | 44.5                     | 50.1                             |
| 112                                                                                                 | Resolubilized  | Bu <sub>4</sub> NOMs | 20                               | HPO <sub>4</sub> <sup>2-</sup>              | 100                  | 95                   | 46.3                     | 49.1                             |
| 113                                                                                                 | Crude          | Bu <sub>4</sub> NOMs | 20                               | HPO <sub>4</sub> <sup>2-</sup>              | 100                  | 97                   | 56.4                     | 38.9                             |
| 114                                                                                                 | Resolubilized  | Bu <sub>4</sub> NOMs | 20                               | HPO <sub>4</sub> <sup>2-</sup>              | 100                  | 97                   | 53.4                     | 40.8                             |

|            |               |                      |    |                                |     |    |      |      |
|------------|---------------|----------------------|----|--------------------------------|-----|----|------|------|
| <b>115</b> | Crude         | Bu <sub>4</sub> NOMs | 20 | HPO <sub>4</sub> <sup>2-</sup> | 100 | 95 | 62.1 | 33.6 |
| <b>116</b> | Resolubilized | Bu <sub>4</sub> NOMs | 20 | HPO <sub>4</sub> <sup>2-</sup> | 100 | 95 | 60.1 | 34.7 |
| <b>117</b> | Crude         | Bu <sub>4</sub> NOMs | 20 | CO <sub>3</sub> <sup>2-</sup>  | 90  | 83 | 66.8 | 20.8 |
| <b>118</b> | Resolubilized | Bu <sub>4</sub> NOMs | 20 | CO <sub>3</sub> <sup>2-</sup>  | 90  | 83 | 53.9 | 28   |
| <b>119</b> | Crude         | Bu <sub>4</sub> NOMs | 20 | CO <sub>3</sub> <sup>2-</sup>  | 100 | 97 | 71.4 | 24.3 |
| <b>120</b> | Resolubilized | Bu <sub>4</sub> NOMs | 20 | CO <sub>3</sub> <sup>2-</sup>  | 100 | 97 | 56.1 | 39.6 |
| <b>121</b> | Crude         | Bu <sub>4</sub> NOMs | 20 | CO <sub>3</sub> <sup>2-</sup>  | 100 | 96 | 73.2 | 22.1 |
| <b>122</b> | Resolubilized | Bu <sub>4</sub> NOMs | 20 | CO <sub>3</sub> <sup>2-</sup>  | 100 | 96 | 55.3 | 39.9 |
| <b>123</b> | Crude         | Bu <sub>4</sub> NOMs | 20 | PO <sub>4</sub> <sup>3-</sup>  | 100 | 97 | 82.4 | 12.3 |
| <b>124</b> | Resolubilized | Bu <sub>4</sub> NOMs | 20 | PO <sub>4</sub> <sup>3-</sup>  | 100 | 97 | 79.7 | 14.4 |
| <b>125</b> | Crude         | Bu <sub>4</sub> NOMs | 20 | PO <sub>4</sub> <sup>3-</sup>  | 100 | 97 | 88.4 | 8.5  |
| <b>126</b> | Resolubilized | Bu <sub>4</sub> NOMs | 20 | PO <sub>4</sub> <sup>3-</sup>  | 100 | 97 | 85   | 9.1  |
| <b>127</b> | Crude         | Bu <sub>4</sub> NOMs | 20 | PO <sub>4</sub> <sup>3-</sup>  | 100 | 97 | 63.4 | 30.7 |
| <b>128</b> | Resolubilized | Bu <sub>4</sub> NOMs | 20 | PO <sub>4</sub> <sup>3-</sup>  | 100 | 97 | 58.1 | 34.9 |

### Analysis of decayed reaction crudes with different preconditioning anions

Reactions performed according to the general method for manual radiolabeling showed different results depending on the preconditioning of the QMA. Nucleophilic anions substituted the precursor **2** competing with the [<sup>18</sup>F]fluoride resulting in very low incorporation. Results from the LCMS and UV-channel on the analytical HPLC can be seen in *Figure S5*.

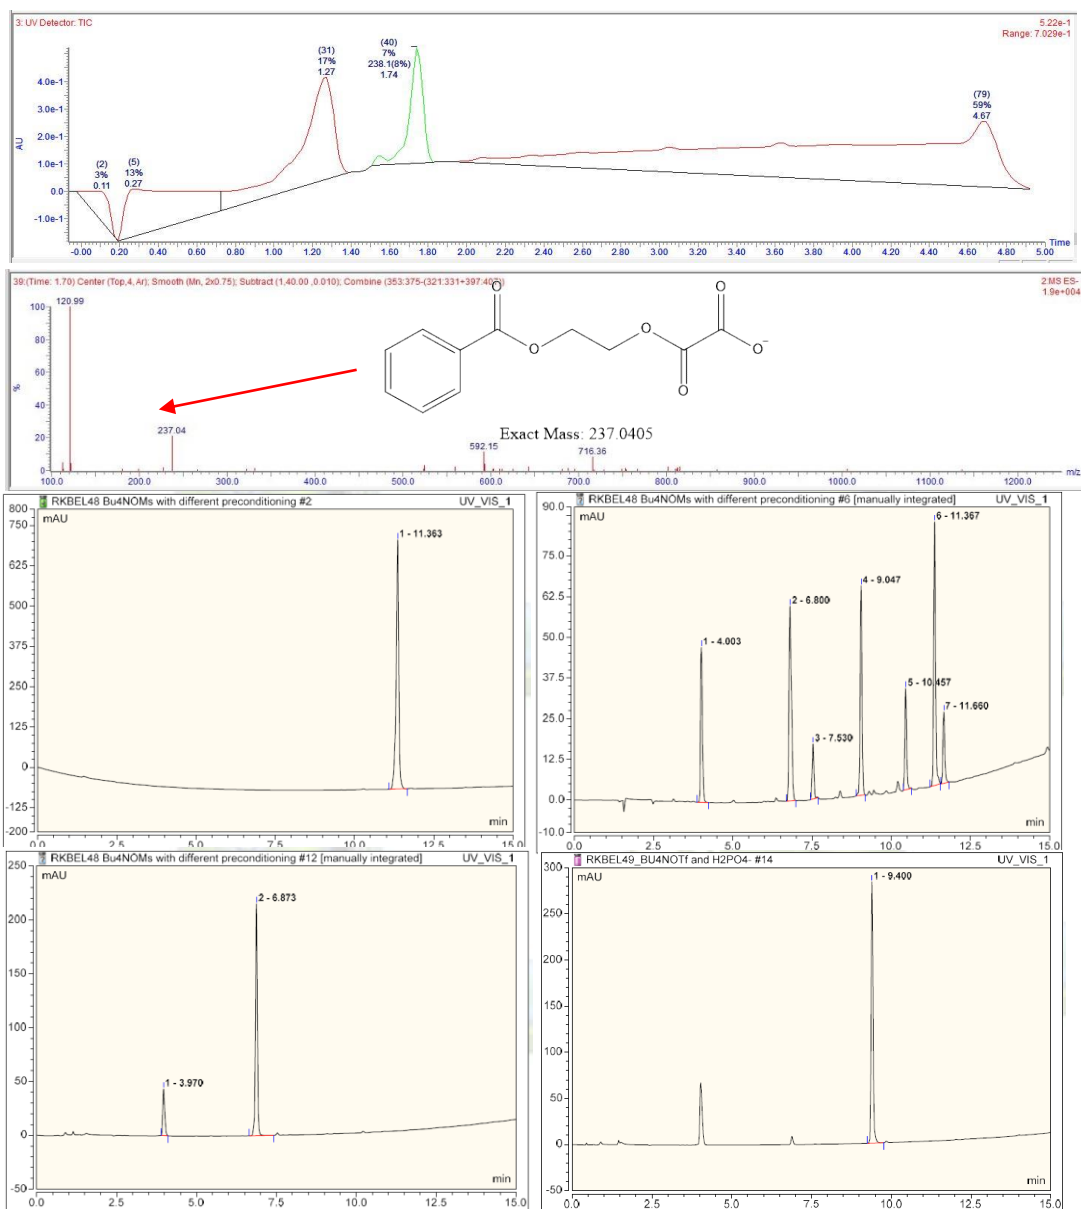

**Figure S5** Chromatogram from LCMS analysis (UV and MS negative mode) of decayed analytical HPLC sample of  $C_2O_4^{2-}$  preconditioned QMA eluted with  $Bu_4NOMs$  (top). Results from analytical HPLC of samples with different preconditioning. Middle left: Precursor **2** (1 mg/mL) for reference (rt: 11.36 min). Middle right:  $HCO_3^-$  preconditioned QMA eluted with  $Bu_4NOMs$  (20 mM), reference how degradation of precursor looks for a successful radiolabeling reaction. Bottom left:  $C_2O_4^{2-}$  preconditioned QMA eluted with  $Bu_4NOMs$  (20 mM), resulting in 1 major UV active product (rt: 6.87 min) identified as the  $C_2O_4$ -substituted precursor by LCMS. Bottom right:  $AcO^-$  preconditioned QMA eluted with  $Bu_4NOMs$  (20 mM), showing the same pattern as  $C_2O_4^{2-}$  with one major UV active product (rt: 9.40 min) however, LCMS analysis was inconclusive.



## “Cold” analysis of QMA using pH measurements and qNMR

### Analysis using pH meter

Calibration curves were prepared by mixing different concentrations of the desired anion in solutions with MeCN /H<sub>2</sub>O, 50:50. The solutions were then measured using a pH meter (Knick Portamess 913 pH Meter) and the results were plotted, (Figure S6-8).

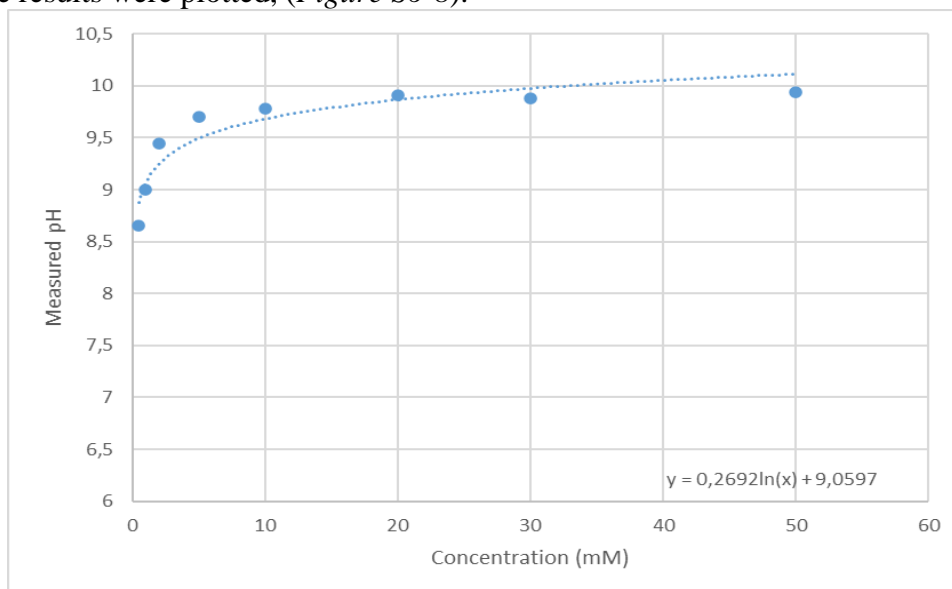

Figure S6 Calibration curve for KHCO<sub>3</sub>.

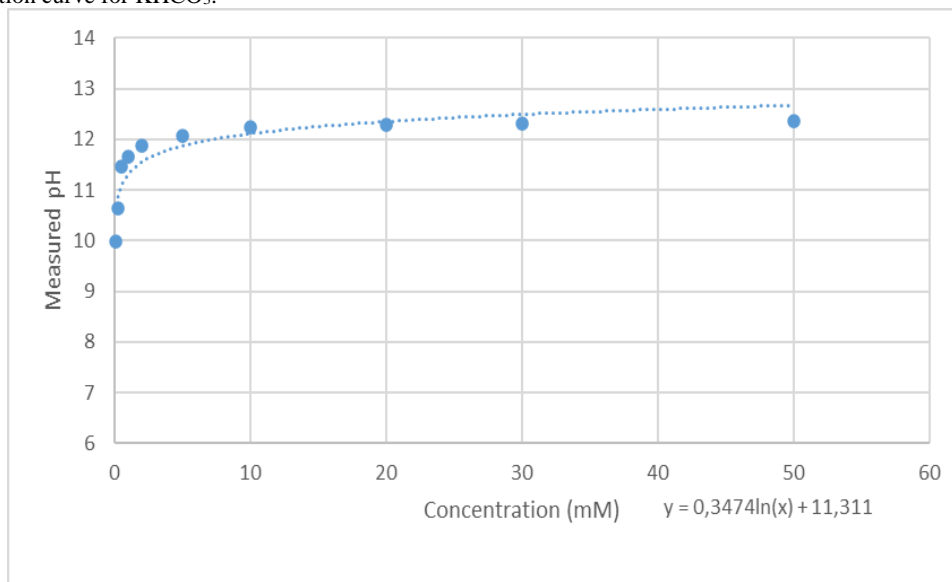

Figure S7 Calibration curve for K<sub>2</sub>CO<sub>3</sub>.

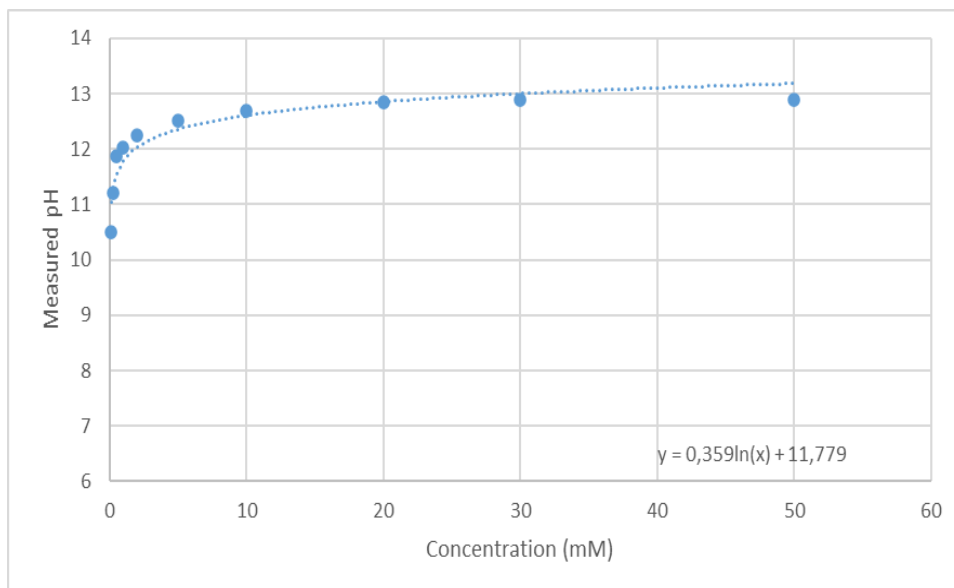

**Figure S8** Calibration curve for  $K_3PO_4$ .

QMA (Sep-Pak® Light QMA cartridge, chloride as counter ion) was preconditioned by flushing with EtOH (2 mL) followed by a solution of the appropriate preconditioning anion (0.5 M solution, 10 mL). The cartridge was then washed with  $H_2O$  (10 mL) and dried with air. Solutions of  $Bu_4NOMs$  at different concentrations were made and their pH was measured to make sure this didn't significantly influence pH (*Figure S9*).

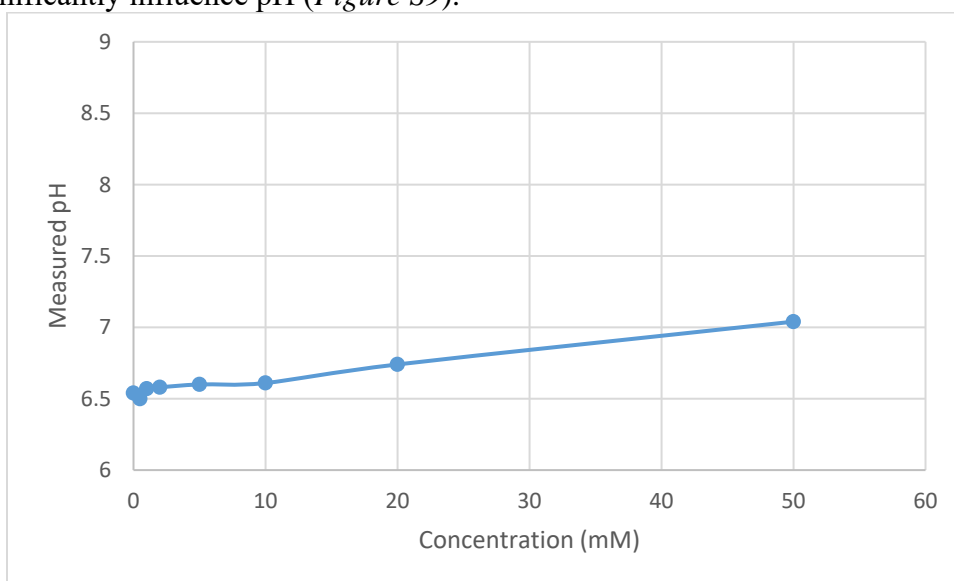

**Figure S9** Checking different concentrations of  $Bu_4NOMs$  to determine that it doesn't influence pH significantly.

Control experiments were made with  $KHCO_3$ ,  $K_2CO_3$ , and  $K_3PO_4$  (20 mM) mixed with  $Bu_3NOMs$  (20 mM) and the pH corresponded to the solutions not containing  $Bu_4OMs$ . The solutions of  $Bu_4OMs$  at different concentrations were used to elute the preconditioned QMAs into a 1.5 mL vial using a 1 mL syringe. Following elution, the QMA was flushed with 1 mL of air to make sure all of the liquid passed through. The pH of the eluate was measured using the pH meter and the concentration of the displaced

preconditioning anion was calculated using the equations derived from the corresponding calibration curves. The results are presented in *Table S6*.

**Table S6** Results from “Cold” analysis of QMA using pH meter.

| <b>KHCO<sub>3</sub> preconditioned QMA</b>            |                    |                                                                   |
|-------------------------------------------------------|--------------------|-------------------------------------------------------------------|
| <b>Concentration of Bu<sub>4</sub>NOMs</b>            | <b>Measured pH</b> | <b>Calculated KHCO<sub>3</sub> conc in eluate (mM)</b>            |
| 5                                                     | 9.20               | 1.68                                                              |
| 20                                                    | 9.89               | 21.85                                                             |
| 30                                                    | 9.77               | 14.00                                                             |
| 50                                                    | 9.9                | 22.68                                                             |
| <b>K<sub>2</sub>CO<sub>3</sub> preconditioned QMA</b> |                    |                                                                   |
| <b>Concentration of Bu<sub>4</sub>NOMs</b>            | <b>Measured pH</b> | <b>Calculated K<sub>2</sub>CO<sub>3</sub> conc in eluate (mM)</b> |
| 5                                                     | 11.18              | 0.69                                                              |
| 20                                                    | 11.45              | 1.49                                                              |
| 30                                                    | 11.44              | 1.45                                                              |
| 50                                                    | 11.49              | 1.67                                                              |
| <b>K<sub>3</sub>PO<sub>4</sub> preconditioned QMA</b> |                    |                                                                   |
| <b>Concentration of Bu<sub>4</sub>NOMs</b>            | <b>Measured pH</b> | <b>Calculated K<sub>3</sub>PO<sub>4</sub> conc in eluate (mM)</b> |
| 5                                                     | 11.81              | 1.09                                                              |
| 20                                                    | 11.94              | 1.57                                                              |
| 30                                                    | 11.97              | 1.70                                                              |
| 50                                                    | 11.97              | 1.70                                                              |

### Analysis using qNMR

Calibration curves were made with solutions of Et<sub>4</sub>NHCO<sub>3</sub> for HCO<sub>3</sub><sup>-</sup> (<sup>13</sup>C-NMR) and Bu<sub>4</sub>NH<sub>2</sub>PO<sub>4</sub> for H<sub>2</sub>PO<sub>4</sub><sup>-</sup> (<sup>31</sup>P-NMR) and Bu<sub>4</sub>NOMs for OMs<sup>-</sup> (<sup>1</sup>H-NMR) by dissolving the compounds at different concentrations in DMSO-d<sub>6</sub>. Validation experiments were made with 2 different concentrations of calibration solutions. The relaxation delay (d1) was tested for <sup>13</sup>C-, <sup>31</sup>P- and <sup>1</sup>H-spectra (2.0 (1.0 for <sup>1</sup>H), 10.0, and 20.0 s) were 2.0 sec gave the most accurate results for <sup>13</sup>C and <sup>31</sup>P whereas 1.0 sec gave the most accurate result for <sup>1</sup>H. <sup>13</sup>C- and <sup>1</sup>H-NMR was recorded on a 600 MHz Bruker Avance III HD at a spectrometer frequency of 150.83 MHz for <sup>13</sup>C and 600 MHz for <sup>1</sup>H, running 512 and 64 scans respectively. <sup>31</sup>P-NMR was recorded on a 400 MHz Bruker Avance II HD at a spectrometer frequency of 161.95 MHz running 512 scans.

#### <sup>13</sup>C calibration

The <sup>13</sup>C NMR was analyzed using HSQC and the peak at offset 156.7 ppm was identified as the bicarbonate carbon. The peak was integrated and a calibration curve using the solvent as an internal standard was made (*Figure S10*), values were plotted using Excel.

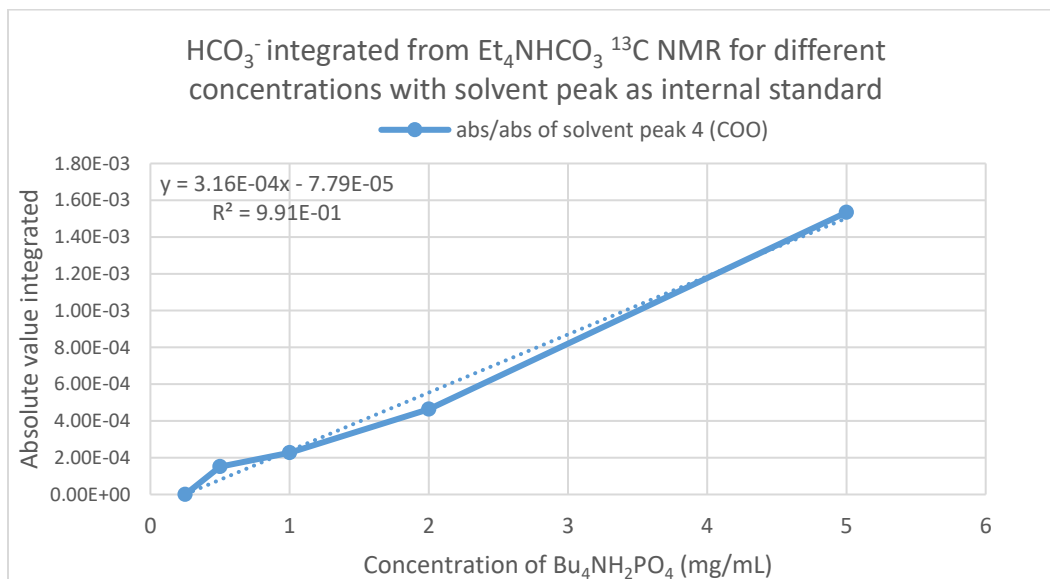

**Figure S10** Calibration curves for HCO<sub>3</sub><sup>-</sup> using Et<sub>4</sub>NHCO<sub>3</sub> with solvent peak as internal standard.

### <sup>1</sup>H calibration

A calibration curve for the CH<sub>3</sub> peak of the OMs<sup>-</sup> anion was made using different concentrations of Bu<sub>4</sub>NOMs. The singlet peak was identified at 2.29 ppm and integration was divided by the solvent peak used as an internal standard. The results were plotted using excel, see *figure S11*.

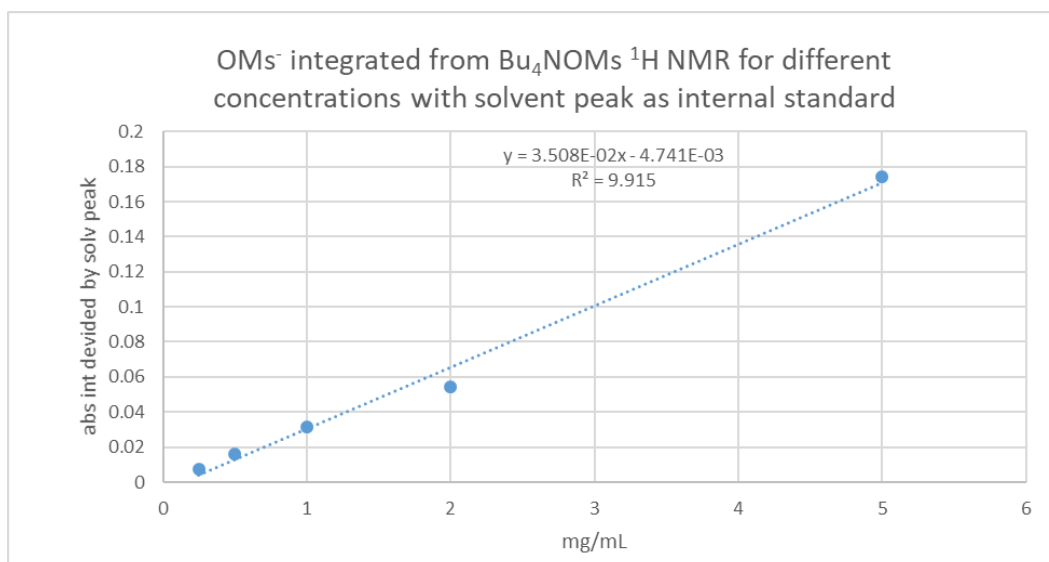

**Figure S11** Calibration curve OMs<sup>-</sup> using Bu<sub>4</sub>NOMs with solvent peak as internal standard.

### <sup>31</sup>P calibration

A calibration curve was made for  $\text{H}_2\text{PO}_4^-$  in the same manner were triphenyl phosphate ( $\text{Ph}_3\text{PO}_4$ ) was used as an internal standard (1 mg/mL) in each sample. However, the internal standard (peak offset around -17 ppm in accordance with reference values)<sup>6</sup> proved to be non-inert and the absolute value of the was heavily affected by different concentrations of  $\text{Bu}_4\text{NH}_2\text{PO}_4$  while the absolute value of the phosphate peak identified as  $\text{H}_2\text{PO}_4^-$  (peak offset around 0 ppm) showed a very nice linear correlation over different concentrations (Figure S12). The <sup>31</sup>P-values for  $\text{H}_2\text{PO}_4^-$  were compared with the <sup>1</sup>H-peak of  $\text{CH}_2$  signal from the  $\text{Bu}_4\text{N}^+$  counter ion for the same samples, which also confirmed the linear correlation (Figure S13). For higher concentrations of  $\text{Bu}_4\text{NH}_2\text{PO}_4$  a second peak appeared which is believed to be  $\text{HPO}_4^{2-}$  why this interval was chosen (0.25-5 mg).

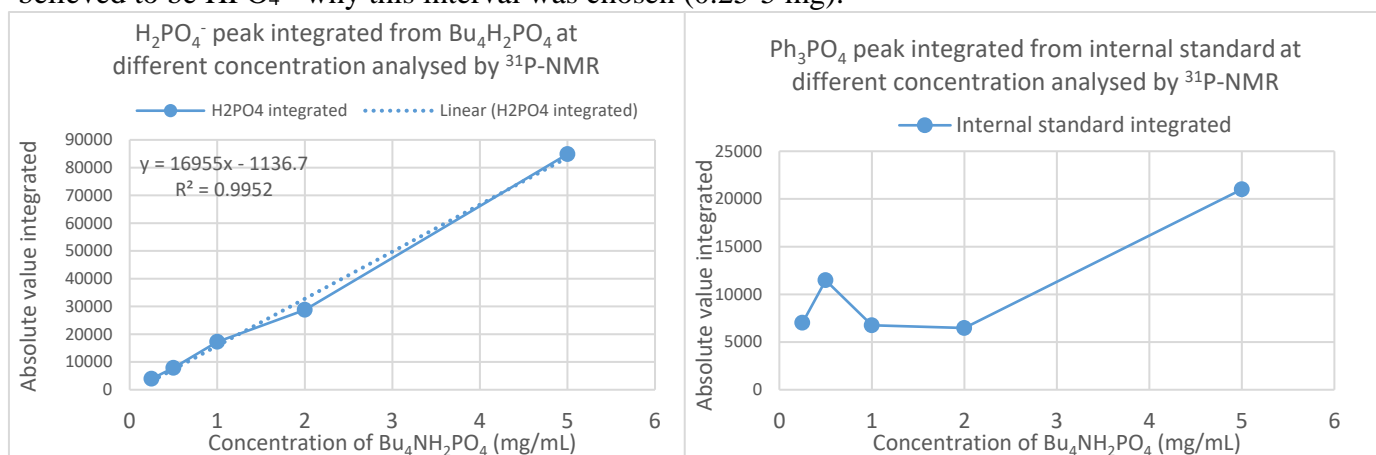

**Figure S12** Calibration curves for  $\text{H}_2\text{PO}_4^-$  using  $\text{Bu}_4\text{NH}_2\text{PO}_4$  with absolute values integrated for  $\text{H}_2\text{PO}_4^-$  (left) and the internal standard  $\text{Ph}_3\text{PO}_4$  (1 mg/mL) at different concentrations of  $\text{Bu}_4\text{NH}_2\text{PO}_4$  (right).

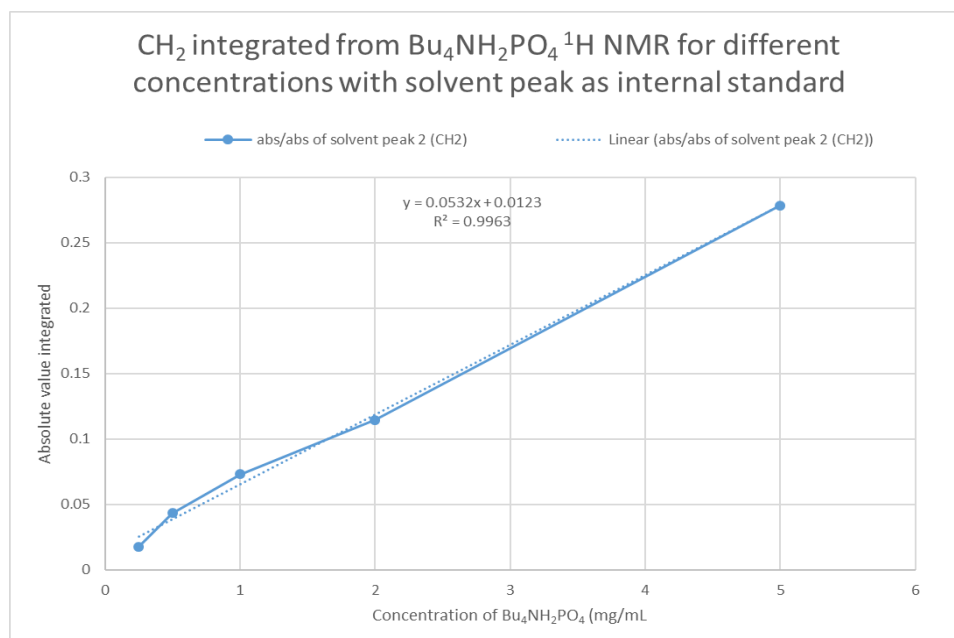

**Figure S13**  $\text{CH}_2$ -peak of  $\text{Bu}_4\text{NH}_2\text{PO}_4$  at different concentrations divided by solvent peak integrated from <sup>1</sup>H NMR to confirm concentration accuracy of absolute integration of  $\text{H}_2\text{PO}_4^-$  from the <sup>31</sup>P NMR.

### qNMR analysis of QMA eluates

The QMAs were preconditioned in the same manner as for the pH measurement analysis. The QMA was eluted using 20 mM solutions of the investigated anion (MeCN /H<sub>2</sub>O, 50:50) into a 4 mL vial. The vial was placed in a heating block and heated to 100 °C under a stream of nitrogen for 10 min to remove the eluting solvent. Azeotropic drying by MeCN added 2x0.5 mL followed by 5 min drying at 100 °C under a stream of nitrogen. To the dried vial 1 mL of d<sub>6</sub>-DMSO was added and the vial was placed in a heating block at 120 °C for 5 min. The vial was allowed to cool for 1 min and 0.4 mL of the solvent was placed in a NMR tube and the solution was analyzed using the same sequences as for the calibration solutions. The results show that the lower valent anions are displaced to a higher extent compared to the multivalent anions from the QMA. This was corroborated by the fact that the eluting OMs<sup>-</sup> anion concentration was lower for the HCO<sub>3</sub><sup>-</sup> preconditioned QMA compared to the multivalent carbonate or phosphate preconditioned QMAs. This is because the difference in affinity to the resin for anions of the same valency is lower causing the OMs<sup>-</sup> to displace the HCO<sub>3</sub><sup>-</sup> preconditioning anion and it gets adsorbed to the QMA. Whereas for PO<sub>4</sub><sup>3-</sup> preconditioned QMA the OMs<sup>-</sup> anion passes through but is not able to displace the more strongly bound preconditioning anion and is thus not adsorbed to the QMA resulting in a higher concentration of OMs<sup>-</sup> in the eluted sample, *Table S7*.

**Table S7** Compiled results from the qNMR analysis of eluted QMA varying the preconditioning and eluting anions, all experiments were carried out in triplicates.

| Eluting anion flow through                      | Eluting anion concentration (mM)                               |                                                                |                                                                                                |                                                                              |
|-------------------------------------------------|----------------------------------------------------------------|----------------------------------------------------------------|------------------------------------------------------------------------------------------------|------------------------------------------------------------------------------|
|                                                 | Bu <sub>4</sub> NOMs [OMs <sup>-</sup> ]                       |                                                                | Bu <sub>4</sub> NH <sub>2</sub> PO <sub>4</sub> [H <sub>2</sub> PO <sub>4</sub> <sup>-</sup> ] |                                                                              |
| Eluting anion                                   |                                                                |                                                                |                                                                                                |                                                                              |
| HCO <sub>3</sub> <sup>-</sup>                   | 1.33 ± 0.41                                                    |                                                                | 0.86 ± 0.42                                                                                    |                                                                              |
| CO <sub>3</sub> <sup>2-</sup>                   | 2.60 ± 0.51                                                    |                                                                | 0.77 ± 0.03                                                                                    |                                                                              |
| HPO <sub>4</sub> <sup>2-</sup>                  | 3.0 ± 0.35                                                     |                                                                | 5.40 ± 0.45                                                                                    |                                                                              |
| PO <sub>4</sub> <sup>3-</sup>                   | 3.44 ± 0.15                                                    |                                                                | 2.24 ± 3.17                                                                                    |                                                                              |
| Preconditioning anion break through             | Preconditioning anion concentration (mM)                       |                                                                |                                                                                                |                                                                              |
|                                                 | HCO <sub>3</sub> <sup>-</sup> [HCO <sub>3</sub> <sup>-</sup> ] | CO <sub>3</sub> <sup>2-</sup> [HCO <sub>3</sub> <sup>-</sup> ] | HPO <sub>4</sub> <sup>2-</sup> [H <sub>2</sub> PO <sub>4</sub> <sup>-</sup> ]                  | PO <sub>4</sub> <sup>3-</sup> [H <sub>2</sub> PO <sub>4</sub> <sup>-</sup> ] |
| Eluting anion                                   |                                                                |                                                                |                                                                                                |                                                                              |
| Bu <sub>4</sub> NOMs                            | 2.48 ± 0.16                                                    | 1.16 ± 0.13                                                    | 2.28 ± 0.17                                                                                    | 0.76 ± 0.01                                                                  |
| Bu <sub>4</sub> NH <sub>2</sub> PO <sub>4</sub> | 1.76 ± 0.35                                                    | 2.00 ± 0.13                                                    | 5.40 ± 0.45                                                                                    | 2.24 ± 3.17                                                                  |

The results from the qNMR analysis generally generate a lower value of the concentration of the eluted preconditioning anion than the pH-analysis method. This is expected as the eluates are azeotropically distilled using MeCN at 100 °C which could result in adsorption of anions to the glass walls. Another factor for reduction of HCO<sub>3</sub><sup>-</sup> is the possible formation of CO<sub>2</sub> from H<sub>2</sub>CO<sub>3</sub> at high temperatures under the slightly acidic conditions from Bu<sub>4</sub>NH<sub>2</sub>PO<sub>4</sub>.

## Comparing resolubilization capabilities of different cations

Comparing resolubilization between  $\text{Bu}_4^+$ - and  $\text{K}^+/\text{K}_{222}$ -salts for elution of  $\text{HCO}_3^-$ -preconditioned QMA. The reactions were conducted according to the general procedure for manual radiolabeling reactions, Table S8-S9.

**Table S8** Results from comparing  $\text{Bu}_4^+$ - and  $\text{K}^+/\text{K}_{222}$ -salts for elution of  $\text{HCO}_3^-$ -preconditioned QMA with MeCN as a reaction solvent.

| Testing resolubilization between $\text{K}^+/\text{K}_{222}$ - and $\text{Bu}_4\text{N}$ -salts |                |                                        |                                  |                       |                      |                      |                          |                             |
|-------------------------------------------------------------------------------------------------|----------------|----------------------------------------|----------------------------------|-----------------------|----------------------|----------------------|--------------------------|-----------------------------|
| Exp id                                                                                          | Type of sample | Eluting anion                          | Concentration eluting anion (mM) | Preconditioning anion | Expected elution (%) | Observed elution (%) | $[\text{F}^{18}]$ -3 (%) | $[\text{F}^{18}]\text{F}^-$ |
| 31                                                                                              | Crude          | $\text{Bu}_4\text{NOMs}$               | 30                               | $\text{HCO}_3^-$      | 100                  | 98                   | 63.5                     | 27.1                        |
| 32                                                                                              | Resolubilized  | $\text{Bu}_4\text{NOMs}$               | 30                               | $\text{HCO}_3^-$      | 100                  | 98                   | 53.5                     | 37.2                        |
| 33                                                                                              | Crude          | $\text{Bu}_4\text{NOMs}$               | 20                               | $\text{HCO}_3^-$      | 90                   | 92                   | 65.7                     | 21.2                        |
| 34                                                                                              | Resolubilized  | $\text{Bu}_4\text{NOMs}$               | 20                               | $\text{HCO}_3^-$      | 90                   | 92                   | 51.7                     | 30                          |
| 35                                                                                              | Crude          | $\text{Bu}_4\text{NOMs}$               | 15                               | $\text{HCO}_3^-$      | 50                   | 82                   | 60.3                     | 27.5                        |
| 36                                                                                              | Resolubilized  | $\text{Bu}_4\text{NOMs}$               | 15                               | $\text{HCO}_3^-$      | 50                   | 82                   | 51.8                     | 36.2                        |
| 37                                                                                              | Crude          | $\text{Bu}_4\text{NOMs}$               | 6                                | $\text{HCO}_3^-$      | 20                   | 22                   | 62.4                     | 30.7                        |
| 38                                                                                              | Resolubilized  | $\text{Bu}_4\text{NOMs}$               | 6                                | $\text{HCO}_3^-$      | 20                   | 22                   | 52.7                     | 39.8                        |
| 129                                                                                             | Crude          | $\text{K}_2\text{SO}_4/\text{K}_{222}$ | 30                               | $\text{HCO}_3^-$      | 90                   | 99                   | 53.7                     | 38.1                        |
| 130                                                                                             | Resolubilized  | $\text{K}_2\text{SO}_4/\text{K}_{222}$ | 30                               | $\text{HCO}_3^-$      | 90                   | 99                   | 44.1                     | 46.5                        |
| 131                                                                                             | Crude          | $\text{K}_2\text{SO}_4/\text{K}_{222}$ | 10                               | $\text{HCO}_3^-$      | 90                   | 98                   | 69.9                     | 15.6                        |
| 132                                                                                             | Resolubilized  | $\text{K}_2\text{SO}_4/\text{K}_{222}$ | 10                               | $\text{HCO}_3^-$      | 90                   | 98                   | 50.2                     | 42.2                        |
| 133                                                                                             | Crude          | $\text{K}_2\text{SO}_4/\text{K}_{222}$ | 5                                | $\text{HCO}_3^-$      | 85                   | 53                   | 59.4                     | 25.8                        |
| 134                                                                                             | Resolubilized  | $\text{K}_2\text{SO}_4/\text{K}_{222}$ | 5                                | $\text{HCO}_3^-$      | 85                   | 53                   | 41.2                     | 49.9                        |
| 135                                                                                             | Crude          | $\text{K}_2\text{SO}_4/\text{K}_{222}$ | 3                                | $\text{HCO}_3^-$      | 10                   | 19                   | 41.6                     | 41.6                        |
| 136                                                                                             | Resolubilized  | $\text{K}_2\text{SO}_4/\text{K}_{222}$ | 3                                | $\text{HCO}_3^-$      | 10                   | 19                   | 23.4                     | 61.3                        |
| 137                                                                                             | Crude          | $\text{KOMs}/\text{K}_{222}$           | 30                               | $\text{HCO}_3^-$      | 95                   | 100                  | 62.7                     | 37.3                        |
| 138                                                                                             | Resolubilized  | $\text{KOMs}/\text{K}_{222}$           | 30                               | $\text{HCO}_3^-$      | 95                   | 100                  | 47.7                     | 52.3                        |
| 139                                                                                             | Crude          | $\text{KOMs}/\text{K}_{222}$           | 20                               | $\text{HCO}_3^-$      | 90                   | 85                   | 64.3                     | 35.7                        |
| 140                                                                                             | Resolubilized  | $\text{KOMs}/\text{K}_{222}$           | 20                               | $\text{HCO}_3^-$      | 90                   | 85                   | 49.9                     | 50.1                        |
| 141                                                                                             | Crude          | $\text{KOMs}/\text{K}_{222}$           | 10                               | $\text{HCO}_3^-$      | 30                   | 41                   | 63.1                     | 36.9                        |
| 142                                                                                             | Resolubilized  | $\text{KOMs}/\text{K}_{222}$           | 10                               | $\text{HCO}_3^-$      | 30                   | 41                   | 43.2                     | 56.8                        |
| 143                                                                                             | Crude          | $\text{KOMs}/\text{K}_{222}$           | 6                                | $\text{HCO}_3^-$      | 10                   | 9                    | 67.3                     | 32.7                        |
| 144                                                                                             | Resolubilized  | $\text{KOMs}/\text{K}_{222}$           | 6                                | $\text{HCO}_3^-$      | 10                   | 9                    | 60.9                     | 39.1                        |
| 145                                                                                             | Crude          | $(\text{Bu}_4\text{N})_2\text{SO}_4$   | 20                               | $\text{HCO}_3^-$      | 100                  | 97                   | 11                       | 85.2                        |
| 146                                                                                             | Resolubilized  | $(\text{Bu}_4\text{N})_2\text{SO}_4$   | 20                               | $\text{HCO}_3^-$      | 100                  | 97                   | 10.2                     | 85.1                        |
| 147                                                                                             | Crude          | $(\text{Bu}_4\text{N})_2\text{SO}_4$   | 10                               | $\text{HCO}_3^-$      | 90                   | 93                   | 42.1                     | 47.2                        |
| 148                                                                                             | Resolubilized  | $(\text{Bu}_4\text{N})_2\text{SO}_4$   | 10                               | $\text{HCO}_3^-$      | 90                   | 93                   | 36                       | 51.2                        |
| 149                                                                                             | Crude          | $(\text{Bu}_4\text{N})_2\text{SO}_4$   | 5                                | $\text{HCO}_3^-$      | 85                   | 58                   | 49.1                     | 40.2                        |
| 150                                                                                             | Resolubilized  | $(\text{Bu}_4\text{N})_2\text{SO}_4$   | 5                                | $\text{HCO}_3^-$      | 85                   | 58                   | 42.3                     | 47.4                        |

**Table S9** Compiled results of the resolubilization calculated by dividing the amount of product obtained from the crude samples with the resolubilized samples.

| Eluting neutral salt                   | Resolubilization (%)    |
|----------------------------------------|-------------------------|
| $\text{Bu}_4\text{NOMs}$               | $85.9 \pm 2.2$ (n = 4)  |
| $\text{KOMs}/\text{K}_{222}$           | $78.2 \pm 9.1$ (n = 4)  |
| $(\text{Bu}_4\text{N})_2\text{SO}_4$   | $88.1 \pm 4.0$ (n = 3)  |
| $\text{K}_2\text{SO}_4/\text{K}_{222}$ | $69.9 \pm 10.6$ (n = 4) |

## Multiparametric screening of elution conditions

Results from experiments with combination of different tetra alkyl salts with 4 different preconditioned QMA in various solvents. All reactions were performed according to the general procedure for manual radiolabeling. The results are presented in *Table S10*.

**Table S10** Results from radiolabeling combinations from different tetra alkyl salts and preconditioned QMAs in various solvents.

| Bu <sub>4</sub> NOMs elution in MeCN |                |                      |                                  |                                |                      |                      |                          |                                  |
|--------------------------------------|----------------|----------------------|----------------------------------|--------------------------------|----------------------|----------------------|--------------------------|----------------------------------|
| Exp id                               | Type of sample | Eluting anion        | Concentration eluting anion (mM) | Preconditioning anion          | Expected elution (%) | Observed elution (%) | [ <sup>18</sup> F]-3 (%) | [ <sup>18</sup> F]F <sup>-</sup> |
| 105                                  | Crude          | Bu <sub>4</sub> NOMs | 20                               | HCO <sub>3</sub> <sup>-</sup>  | 90                   | 98                   | 63.5                     | 27.1                             |
| 106                                  | Resolubilized  | Bu <sub>4</sub> NOMs | 20                               | HCO <sub>3</sub> <sup>-</sup>  | 90                   | 98                   | 53.5                     | 37.2                             |
| 107                                  | Crude          | Bu <sub>4</sub> NOMs | 20                               | HCO <sub>3</sub> <sup>-</sup>  | 90                   | 85                   | 75.9                     | 18.4                             |
| 108                                  | Resolubilized  | Bu <sub>4</sub> NOMs | 20                               | HCO <sub>3</sub> <sup>-</sup>  | 90                   | 85                   | 71                       | 23.5                             |
| 109                                  | Crude          | Bu <sub>4</sub> NOMs | 20                               | HCO <sub>3</sub> <sup>-</sup>  | 90                   | 90                   | 52.6                     | 43.2                             |
| 110                                  | Resolubilized  | Bu <sub>4</sub> NOMs | 20                               | HCO <sub>3</sub> <sup>-</sup>  | 90                   | 90                   | 48.3                     | 46.6                             |
| 117                                  | Crude          | Bu <sub>4</sub> NOMs | 20                               | CO <sub>3</sub> <sup>2-</sup>  | 90                   | 83                   | 66.8                     | 20.8                             |
| 118                                  | Resolubilized  | Bu <sub>4</sub> NOMs | 20                               | CO <sub>3</sub> <sup>2-</sup>  | 90                   | 83                   | 53.9                     | 28                               |
| 119                                  | Crude          | Bu <sub>4</sub> NOMs | 20                               | CO <sub>3</sub> <sup>2-</sup>  | 100                  | 97                   | 71.4                     | 24.3                             |
| 120                                  | Resolubilized  | Bu <sub>4</sub> NOMs | 20                               | CO <sub>3</sub> <sup>2-</sup>  | 100                  | 97                   | 56.1                     | 39.6                             |
| 121                                  | Crude          | Bu <sub>4</sub> NOMs | 20                               | CO <sub>3</sub> <sup>2-</sup>  | 100                  | 96                   | 73.2                     | 22.1                             |
| 122                                  | Resolubilized  | Bu <sub>4</sub> NOMs | 20                               | CO <sub>3</sub> <sup>2-</sup>  | 100                  | 96                   | 55.3                     | 39.9                             |
| 131                                  | Crude          | Bu <sub>4</sub> NOMs | 20                               | PO <sub>4</sub> <sup>3-</sup>  | 100                  | 97                   | 82.4                     | 12.3                             |
| 132                                  | Resolubilized  | Bu <sub>4</sub> NOMs | 20                               | PO <sub>4</sub> <sup>3-</sup>  | 100                  | 97                   | 79.7                     | 14.4                             |
| 133                                  | Crude          | Bu <sub>4</sub> NOMs | 20                               | PO <sub>4</sub> <sup>3-</sup>  | 100                  | 97                   | 88.4                     | 8.5                              |
| 134                                  | Resolubilized  | Bu <sub>4</sub> NOMs | 20                               | PO <sub>4</sub> <sup>3-</sup>  | 100                  | 97                   | 85                       | 9.1                              |
| 135                                  | Crude          | Bu <sub>4</sub> NOMs | 20                               | PO <sub>4</sub> <sup>3-</sup>  | 100                  | 97                   | 63.4                     | 30.7                             |
| 136                                  | Resolubilized  | Bu <sub>4</sub> NOMs | 20                               | PO <sub>4</sub> <sup>3-</sup>  | 100                  | 97                   | 58.1                     | 34.9                             |
| 111                                  | Crude          | Bu <sub>4</sub> NOMs | 20                               | HPO <sub>4</sub> <sup>2-</sup> | 100                  | 95                   | 44.5                     | 50.1                             |
| 112                                  | Resolubilized  | Bu <sub>4</sub> NOMs | 20                               | HPO <sub>4</sub> <sup>2-</sup> | 100                  | 95                   | 46.3                     | 49.1                             |
| 113                                  | Crude          | Bu <sub>4</sub> NOMs | 20                               | HPO <sub>4</sub> <sup>2-</sup> | 100                  | 97                   | 56.4                     | 38.9                             |
| 114                                  | Resolubilized  | Bu <sub>4</sub> NOMs | 20                               | HPO <sub>4</sub> <sup>2-</sup> | 100                  | 97                   | 53.4                     | 40.8                             |
| 115                                  | Crude          | Bu <sub>4</sub> NOMs | 20                               | HPO <sub>4</sub> <sup>2-</sup> | 100                  | 95                   | 62.1                     | 33.6                             |
| 116                                  | Resolubilized  | Bu <sub>4</sub> NOMs | 20                               | HPO <sub>4</sub> <sup>2-</sup> | 100                  | 95                   | 60.1                     | 34.7                             |
| Bu <sub>4</sub> NOMs elution in DMSO |                |                      |                                  |                                |                      |                      |                          |                                  |
| 151                                  | Crude          | Bu <sub>4</sub> NOMs | 20                               | HCO <sub>3</sub> <sup>-</sup>  | 100                  | 95                   | 71.2                     | 22.3                             |
| 154                                  | Resolubilized  | Bu <sub>4</sub> NOMs | 20                               | HCO <sub>3</sub> <sup>-</sup>  | 100                  | 95                   | 69                       | 25.2                             |
| 159                                  | Crude          | Bu <sub>4</sub> NOMs | 20                               | HCO <sub>3</sub> <sup>-</sup>  | 100                  | 60                   | 45                       | 55                               |
| 160                                  | Resolubilized  | Bu <sub>4</sub> NOMs | 20                               | HCO <sub>3</sub> <sup>-</sup>  | 100                  | 60                   | 53.3                     | 46.6                             |
| 161                                  | Crude          | Bu <sub>4</sub> NOMs | 20                               | HCO <sub>3</sub> <sup>-</sup>  | 100                  | 86                   | 72                       | 23.3                             |
| 162                                  | Resolubilized  | Bu <sub>4</sub> NOMs | 20                               | HCO <sub>3</sub> <sup>-</sup>  | 100                  | 86                   | 66.6                     | 28.6                             |
| 163                                  | Crude          | Bu <sub>4</sub> NOMs | 20                               | CO <sub>3</sub> <sup>2-</sup>  | 100                  | 99                   | 80.1                     | 14.7                             |
| 164                                  | Resolubilized  | Bu <sub>4</sub> NOMs | 20                               | CO <sub>3</sub> <sup>2-</sup>  | 100                  | 99                   | 74.3                     | 20.5                             |
| 165                                  | Crude          | Bu <sub>4</sub> NOMs | 20                               | CO <sub>3</sub> <sup>2-</sup>  | 100                  | 99                   | 88.9                     | 7.7                              |
| 166                                  | Resolubilized  | Bu <sub>4</sub> NOMs | 20                               | CO <sub>3</sub> <sup>2-</sup>  | 100                  | 99                   | 85.4                     | 10.1                             |
| 167                                  | Crude          | Bu <sub>4</sub> NOMs | 20                               | CO <sub>3</sub> <sup>2-</sup>  | 100                  | 95                   | 77.8                     | 16.1                             |
| 168                                  | Resolubilized  | Bu <sub>4</sub> NOMs | 20                               | CO <sub>3</sub> <sup>2-</sup>  | 100                  | 95                   | 71.8                     | 23.5                             |
| 169                                  | Crude          | Bu <sub>4</sub> NOMs | 20                               | PO <sub>4</sub> <sup>3-</sup>  | 100                  | 100                  | 78.8                     | 16.4                             |
| 170                                  | Resolubilized  | Bu <sub>4</sub> NOMs | 20                               | PO <sub>4</sub> <sup>3-</sup>  | 100                  | 100                  | 77.4                     | 18.8                             |
| 171                                  | Crude          | Bu <sub>4</sub> NOMs | 20                               | PO <sub>4</sub> <sup>3-</sup>  | 100                  | 100                  | 61.1                     | 35.6                             |
| 172                                  | Resolubilized  | Bu <sub>4</sub> NOMs | 20                               | PO <sub>4</sub> <sup>3-</sup>  | 100                  | 100                  | 60.7                     | 35.8                             |



|                                                       |               |                      |    |                                |     |     |      |      |
|-------------------------------------------------------|---------------|----------------------|----|--------------------------------|-----|-----|------|------|
| 173                                                   | Crude         | Bu <sub>4</sub> NOMs | 20 | PO <sub>4</sub> <sup>3-</sup>  | 100 | 97  | 88.3 | 5.4  |
| 174                                                   | Resolubilized | Bu <sub>4</sub> NOMs | 20 | PO <sub>4</sub> <sup>3-</sup>  | 100 | 97  | 86.9 | 6.6  |
| 175                                                   | Crude         | Bu <sub>4</sub> NOMs | 20 | HPO <sub>4</sub> <sup>2-</sup> | 100 | 97  | 76.1 | 14.3 |
| 176                                                   | Resolubilized | Bu <sub>4</sub> NOMs | 20 | HPO <sub>4</sub> <sup>2-</sup> | 100 | 97  | 58.1 | 37.6 |
| 177                                                   | Crude         | Bu <sub>4</sub> NOMs | 20 | HPO <sub>4</sub> <sup>2-</sup> | 100 | 99  | 49.6 | 45.2 |
| 178                                                   | Resolubilized | Bu <sub>4</sub> NOMs | 20 | HPO <sub>4</sub> <sup>2-</sup> | 100 | 99  | 48.7 | 46   |
| 179                                                   | Crude         | Bu <sub>4</sub> NOMs | 20 | HPO <sub>4</sub> <sup>2-</sup> | 100 | 96  | 45.4 | 49.8 |
| 180                                                   | Resolubilized | Bu <sub>4</sub> NOMs | 20 | HPO <sub>4</sub> <sup>2-</sup> | 100 | 96  | 45.6 | 50.2 |
| <b>Bu<sub>4</sub>NOMs elution in tBuOH/MeCN (5:1)</b> |               |                      |    |                                |     |     |      |      |
| 181                                                   | Crude         | Bu <sub>4</sub> NOMs | 20 | HCO <sub>3</sub> <sup>-</sup>  | 100 | 92  | 21.5 | 76   |
| 182                                                   | Resolubilized | Bu <sub>4</sub> NOMs | 20 | HCO <sub>3</sub> <sup>-</sup>  | 100 | 92  | 21.9 | 75.2 |
| 183                                                   | Crude         | Bu <sub>4</sub> NOMs | 20 | CO <sub>3</sub> <sup>2-</sup>  | 100 | 97  | 19.8 | 77.9 |
| 184                                                   | Resolubilized | Bu <sub>4</sub> NOMs | 20 | CO <sub>3</sub> <sup>2-</sup>  | 100 | 97  | 18.9 | 78.2 |
| 185                                                   | Crude         | Bu <sub>4</sub> NOMs | 20 | PO <sub>4</sub> <sup>3-</sup>  | 100 | 99  | 14.9 | 82.2 |
| 186                                                   | Resolubilized | Bu <sub>4</sub> NOMs | 20 | PO <sub>4</sub> <sup>3-</sup>  | 100 | 99  | 18.2 | 78.4 |
| 187                                                   | Crude         | Bu <sub>4</sub> NOMs | 20 | HPO <sub>4</sub> <sup>2-</sup> | 100 | 99  | 15.5 | 80.7 |
| 188                                                   | Resolubilized | Bu <sub>4</sub> NOMs | 20 | HPO <sub>4</sub> <sup>2-</sup> | 100 | 99  | 13.8 | 82   |
| <b>Bu<sub>4</sub>NOTf elution in MeCN</b>             |               |                      |    |                                |     |     |      |      |
| 189                                                   | Crude         | Bu <sub>4</sub> NOTf | 20 | HCO <sub>3</sub> <sup>-</sup>  | 10  | 4   | 55.4 | 30.8 |
| 190                                                   | Resolubilized | Bu <sub>4</sub> NOTf | 20 | HCO <sub>3</sub> <sup>-</sup>  | 10  | 4   | 48.5 | 32.7 |
| 191                                                   | Crude         | Bu <sub>4</sub> NOTf | 20 | CO <sub>3</sub> <sup>2-</sup>  | 100 | 95  | 70   | 24.9 |
| 192                                                   | Resolubilized | Bu <sub>4</sub> NOTf | 20 | CO <sub>3</sub> <sup>2-</sup>  | 100 | 95  | 48   | 44.9 |
| 193                                                   | Crude         | Bu <sub>4</sub> NOTf | 20 | CO <sub>3</sub> <sup>2-</sup>  | 100 | 89  | 39.6 | 60.4 |
| 194                                                   | Resolubilized | Bu <sub>4</sub> NOTf | 20 | CO <sub>3</sub> <sup>2-</sup>  | 100 | 89  | 25.2 | 74.8 |
| 195                                                   | Crude         | Bu <sub>4</sub> NOTf | 20 | CO <sub>3</sub> <sup>2-</sup>  | 100 | 90  | 47.6 | 52.4 |
| 196                                                   | Resolubilized | Bu <sub>4</sub> NOTf | 20 | CO <sub>3</sub> <sup>2-</sup>  | 100 | 90  | 36.1 | 63.9 |
| 197                                                   | Crude         | Bu <sub>4</sub> NOTf | 20 | PO <sub>4</sub> <sup>3-</sup>  | 100 | 99  | 65.2 | 30.1 |
| 198                                                   | Resolubilized | Bu <sub>4</sub> NOTf | 20 | PO <sub>4</sub> <sup>3-</sup>  | 100 | 99  | 61   | 34.6 |
| 199                                                   | Crude         | Bu <sub>4</sub> NOTf | 20 | PO <sub>4</sub> <sup>3-</sup>  | 100 | 100 | 81   | 12.7 |
| 200                                                   | Resolubilized | Bu <sub>4</sub> NOTf | 20 | PO <sub>4</sub> <sup>3-</sup>  | 100 | 100 | 79.5 | 13.8 |
| 201                                                   | Crude         | Bu <sub>4</sub> NOTf | 20 | PO <sub>4</sub> <sup>3-</sup>  | 100 | 100 | 72.6 | 18   |
| 202                                                   | Resolubilized | Bu <sub>4</sub> NOTf | 20 | PO <sub>4</sub> <sup>3-</sup>  | 100 | 100 | 71.3 | 21.2 |
| 203                                                   | Crude         | Bu <sub>4</sub> NOTf | 20 | HPO <sub>4</sub> <sup>2-</sup> | 100 | 85  | 5.3  | 92.1 |
| 204                                                   | Resolubilized | Bu <sub>4</sub> NOTf | 20 | HPO <sub>4</sub> <sup>2-</sup> | 100 | 85  | 5.1  | 91.8 |
| 205                                                   | Crude         | Bu <sub>4</sub> NOTf | 20 | HPO <sub>4</sub> <sup>2-</sup> | 100 | 96  | 1    | 99   |
| 206                                                   | Resolubilized | Bu <sub>4</sub> NOTf | 20 | HPO <sub>4</sub> <sup>2-</sup> | 100 | 96  | 0.5  | 99.5 |
| 207                                                   | Crude         | Bu <sub>4</sub> NOTf | 20 | HPO <sub>4</sub> <sup>2-</sup> | 100 | 93  | 2.4  | 95.2 |
| 208                                                   | Resolubilized | Bu <sub>4</sub> NOTf | 20 | HPO <sub>4</sub> <sup>2-</sup> | 100 | 93  | 1.3  | 96   |
| <b>Bu<sub>4</sub>NOTf elution in DMSO</b>             |               |                      |    |                                |     |     |      |      |
| 209                                                   | Crude         | Bu <sub>4</sub> NOTf | 20 | HCO <sub>3</sub> <sup>-</sup>  | 10  | 4   | 69.9 | 16.6 |
| 210                                                   | Resolubilized | Bu <sub>4</sub> NOTf | 20 | HCO <sub>3</sub> <sup>-</sup>  | 10  | 4   | 64.2 | 21.5 |
| 211                                                   | Crude         | Bu <sub>4</sub> NOTf | 20 | CO <sub>3</sub> <sup>2-</sup>  | 100 | 79  | 55.5 | 37.7 |
| 212                                                   | Resolubilized | Bu <sub>4</sub> NOTf | 20 | CO <sub>3</sub> <sup>2-</sup>  | 100 | 79  | 51.9 | 42.4 |
| 213                                                   | Crude         | Bu <sub>4</sub> NOTf | 20 | CO <sub>3</sub> <sup>2-</sup>  | 100 | 100 | 79.9 | 13.7 |
| 214                                                   | Resolubilized | Bu <sub>4</sub> NOTf | 20 | CO <sub>3</sub> <sup>2-</sup>  | 100 | 100 | 71.6 | 17.9 |
| 215                                                   | Crude         | Bu <sub>4</sub> NOTf | 20 | CO <sub>3</sub> <sup>2-</sup>  | 100 | 100 | 66.1 | 26.1 |
| 216                                                   | Resolubilized | Bu <sub>4</sub> NOTf | 20 | CO <sub>3</sub> <sup>2-</sup>  | 100 | 100 | 55.1 | 39.4 |
| 217                                                   | Crude         | Bu <sub>4</sub> NOTf | 20 | PO <sub>4</sub> <sup>3-</sup>  | 100 | 99  | 91.1 | 5.2  |
| 218                                                   | Resolubilized | Bu <sub>4</sub> NOTf | 20 | PO <sub>4</sub> <sup>3-</sup>  | 100 | 99  | 87.4 | 8.3  |
| 219                                                   | Crude         | Bu <sub>4</sub> NOTf | 20 | PO <sub>4</sub> <sup>3-</sup>  | 100 | 97  | 85   | 81.2 |
| 220                                                   | Resolubilized | Bu <sub>4</sub> NOTf | 20 | PO <sub>4</sub> <sup>3-</sup>  | 100 | 97  | 81.2 | 10   |

|                                                                   |               |                                                 |    |                                |     |     |      |       |
|-------------------------------------------------------------------|---------------|-------------------------------------------------|----|--------------------------------|-----|-----|------|-------|
| 221                                                               | Crude         | Bu <sub>4</sub> NOTf                            | 20 | PO <sub>4</sub> <sup>3-</sup>  | 100 | 93  | 80.2 | 14.4  |
| 222                                                               | Resolubilized | Bu <sub>4</sub> NOTf                            | 20 | PO <sub>4</sub> <sup>3-</sup>  | 100 | 93  | 78   | 15.9  |
| 223                                                               | Crude         | Bu <sub>4</sub> NOTf                            | 20 | HPO <sub>4</sub> <sup>2-</sup> | 100 | 67  | 57.2 | 36.8  |
| 224                                                               | Resolubilized | Bu <sub>4</sub> NOTf                            | 20 | HPO <sub>4</sub> <sup>2-</sup> | 100 | 67  | 57.1 | 38.6  |
| 225                                                               | Crude         | Bu <sub>4</sub> NOTf                            | 20 | HPO <sub>4</sub> <sup>2-</sup> | 100 | 100 | 66.2 | 28.6  |
| 226                                                               | Resolubilized | Bu <sub>4</sub> NOTf                            | 20 | HPO <sub>4</sub> <sup>2-</sup> | 100 | 100 | 64.9 | 29.2  |
| 227                                                               | Crude         | Bu <sub>4</sub> NOTf                            | 20 | HPO <sub>4</sub> <sup>2-</sup> | 100 | 99  | 67.7 | 26.6  |
| 228                                                               | Resolubilized | Bu <sub>4</sub> NOTf                            | 20 | HPO <sub>4</sub> <sup>2-</sup> | 100 | 99  | 67.8 | 25.2  |
| <b>Bu<sub>4</sub>NOTf elution in tBuOH/MeCN (5:1)</b>             |               |                                                 |    |                                |     |     |      |       |
| 211                                                               | Crude         | Bu <sub>4</sub> NOTf                            | 20 | HCO <sub>3</sub> <sup>-</sup>  | 10  | 2   | 16.2 | 33.6  |
| 212                                                               | Resolubilized | Bu <sub>4</sub> NOTf                            | 20 | HCO <sub>3</sub> <sup>-</sup>  | 10  | 2   | 15.3 | 34.9  |
| 213                                                               | Crude         | Bu <sub>4</sub> NOTf                            | 20 | CO <sub>3</sub> <sup>2-</sup>  | 100 | 76  | 3.3  | 90.09 |
| 214                                                               | Resolubilized | Bu <sub>4</sub> NOTf                            | 20 | CO <sub>3</sub> <sup>2-</sup>  | 100 | 76  | 2.5  | 91.2  |
| 215                                                               | Crude         | Bu <sub>4</sub> NOTf                            | 20 | PO <sub>4</sub> <sup>3-</sup>  | 100 | 79  | 23   | 69    |
| 216                                                               | Resolubilized | Bu <sub>4</sub> NOTf                            | 20 | PO <sub>4</sub> <sup>3-</sup>  | 100 | 79  | 22.4 | 70.1  |
| 217                                                               | Crude         | Bu <sub>4</sub> NOTf                            | 20 | HPO <sub>4</sub> <sup>2-</sup> | 100 | 71  | 13.3 | 81.3  |
| 218                                                               | Resolubilized | Bu <sub>4</sub> NOTf                            | 20 | HPO <sub>4</sub> <sup>2-</sup> | 100 | 71  | 12.6 | 81.5  |
| <b>Bu<sub>4</sub>NH<sub>2</sub>PO<sub>4</sub> elution in MeCN</b> |               |                                                 |    |                                |     |     |      |       |
| 219                                                               | Crude         | Bu <sub>4</sub> NH <sub>2</sub> PO <sub>4</sub> | 20 | HCO <sub>3</sub> <sup>-</sup>  | 90  | 92  | 70.6 | 24.8  |
| 220                                                               | Resolubilized | Bu <sub>4</sub> NH <sub>2</sub> PO <sub>4</sub> | 20 | HCO <sub>3</sub> <sup>-</sup>  | 90  | 92  | 67.8 | 25.1  |
| 221                                                               | Crude         | Bu <sub>4</sub> NH <sub>2</sub> PO <sub>4</sub> | 20 | HCO <sub>3</sub> <sup>-</sup>  | 100 | 100 | 77.6 | 18.2  |
| 222                                                               | Resolubilized | Bu <sub>4</sub> NH <sub>2</sub> PO <sub>4</sub> | 20 | HCO <sub>3</sub> <sup>-</sup>  | 100 | 100 | 77.8 | 15.7  |
| 223                                                               | Crude         | Bu <sub>4</sub> NH <sub>2</sub> PO <sub>4</sub> | 20 | HCO <sub>3</sub> <sup>-</sup>  | 100 | 98  | 83.3 | 10.9  |
| 224                                                               | Resolubilized | Bu <sub>4</sub> NH <sub>2</sub> PO <sub>4</sub> | 20 | HCO <sub>3</sub> <sup>-</sup>  | 100 | 98  | 82.4 | 12.1  |
| 225                                                               | Crude         | Bu <sub>4</sub> NH <sub>2</sub> PO <sub>4</sub> | 20 | CO <sub>3</sub> <sup>2-</sup>  | 100 | 100 | 88.4 | 6.4   |
| 226                                                               | Resolubilized | Bu <sub>4</sub> NH <sub>2</sub> PO <sub>4</sub> | 20 | CO <sub>3</sub> <sup>2-</sup>  | 100 | 100 | 84.9 | 7.3   |
| 227                                                               | Crude         | Bu <sub>4</sub> NH <sub>2</sub> PO <sub>4</sub> | 20 | CO <sub>3</sub> <sup>2-</sup>  | 100 | 99  | 89.5 | 4.5   |
| 228                                                               | Resolubilized | Bu <sub>4</sub> NH <sub>2</sub> PO <sub>4</sub> | 20 | CO <sub>3</sub> <sup>2-</sup>  | 100 | 99  | 87.6 | 5.8   |
| 229                                                               | Crude         | Bu <sub>4</sub> NH <sub>2</sub> PO <sub>4</sub> | 20 | CO <sub>3</sub> <sup>2-</sup>  | 100 | 97  | 89.2 | 6.9   |
| 230                                                               | Resolubilized | Bu <sub>4</sub> NH <sub>2</sub> PO <sub>4</sub> | 20 | CO <sub>3</sub> <sup>2-</sup>  | 100 | 97  | 86.9 | 8.9   |
| 231                                                               | Crude         | Bu <sub>4</sub> NH <sub>2</sub> PO <sub>4</sub> | 20 | PO <sub>4</sub> <sup>3-</sup>  | 100 | 97  | 67.8 | 29    |
| 232                                                               | Resolubilized | Bu <sub>4</sub> NH <sub>2</sub> PO <sub>4</sub> | 20 | PO <sub>4</sub> <sup>3-</sup>  | 100 | 97  | 65.9 | 29.8  |
| 233                                                               | Crude         | Bu <sub>4</sub> NH <sub>2</sub> PO <sub>4</sub> | 20 | PO <sub>4</sub> <sup>3-</sup>  | 100 | 98  | 26   | 69    |
| 234                                                               | Resolubilized | Bu <sub>4</sub> NH <sub>2</sub> PO <sub>4</sub> | 20 | PO <sub>4</sub> <sup>3-</sup>  | 100 | 98  | 24.8 | 69.9  |
| 235                                                               | Crude         | Bu <sub>4</sub> NH <sub>2</sub> PO <sub>4</sub> | 20 | PO <sub>4</sub> <sup>3-</sup>  | 100 | 99  | 60.5 | 34.8  |
| 236                                                               | Resolubilized | Bu <sub>4</sub> NH <sub>2</sub> PO <sub>4</sub> | 20 | PO <sub>4</sub> <sup>3-</sup>  | 100 | 99  | 56.8 | 37.5  |
| 237                                                               | Crude         | Bu <sub>4</sub> NH <sub>2</sub> PO <sub>4</sub> | 20 | HPO <sub>4</sub> <sup>2-</sup> | 100 | 99  | 11.6 | 83.8  |
| 238                                                               | Resolubilized | Bu <sub>4</sub> NH <sub>2</sub> PO <sub>4</sub> | 20 | HPO <sub>4</sub> <sup>2-</sup> | 100 | 99  | 11.9 | 83.4  |
| 239                                                               | Crude         | Bu <sub>4</sub> NH <sub>2</sub> PO <sub>4</sub> | 20 | HPO <sub>4</sub> <sup>2-</sup> | 100 | 99  | 3.6  | 91.6  |
| 240                                                               | Resolubilized | Bu <sub>4</sub> NH <sub>2</sub> PO <sub>4</sub> | 20 | HPO <sub>4</sub> <sup>2-</sup> | 100 | 99  | 3.5  | 91.9  |
| 241                                                               | Crude         | Bu <sub>4</sub> NH <sub>2</sub> PO <sub>4</sub> | 20 | HPO <sub>4</sub> <sup>2-</sup> | 100 | 97  | 16.8 | 80.7  |
| 242                                                               | Resolubilized | Bu <sub>4</sub> NH <sub>2</sub> PO <sub>4</sub> | 20 | HPO <sub>4</sub> <sup>2-</sup> | 100 | 97  | 16.9 | 80.5  |
| <b>Bu<sub>4</sub>NH<sub>2</sub>PO<sub>4</sub> elution in DMSO</b> |               |                                                 |    |                                |     |     |      |       |
| 243                                                               | Crude         | Bu <sub>4</sub> NH <sub>2</sub> PO <sub>4</sub> | 20 | HCO <sub>3</sub> <sup>-</sup>  | 100 | 88  | 83.4 | 13    |
| 244                                                               | Resolubilized | Bu <sub>4</sub> NH <sub>2</sub> PO <sub>4</sub> | 20 | HCO <sub>3</sub> <sup>-</sup>  | 100 | 88  | 80   | 15.9  |
| 245                                                               | Crude         | Bu <sub>4</sub> NH <sub>2</sub> PO <sub>4</sub> | 20 | HCO <sub>3</sub> <sup>-</sup>  | 100 | 100 | 84.3 | 8.9   |
| 246                                                               | Resolubilized | Bu <sub>4</sub> NH <sub>2</sub> PO <sub>4</sub> | 20 | HCO <sub>3</sub> <sup>-</sup>  | 100 | 100 | 83.6 | 10.9  |
| 247                                                               | Crude         | Bu <sub>4</sub> NH <sub>2</sub> PO <sub>4</sub> | 20 | HCO <sub>3</sub> <sup>-</sup>  | 100 | 99  | 75.3 | 19.4  |
| 248                                                               | Resolubilized | Bu <sub>4</sub> NH <sub>2</sub> PO <sub>4</sub> | 20 | HCO <sub>3</sub> <sup>-</sup>  | 100 | 99  | 74.5 | 20.4  |
| 249                                                               | Crude         | Bu <sub>4</sub> NH <sub>2</sub> PO <sub>4</sub> | 20 | CO <sub>3</sub> <sup>2-</sup>  | 100 | 99  | 85.6 | 9.7   |
| 250                                                               | Resolubilized | Bu <sub>4</sub> NH <sub>2</sub> PO <sub>4</sub> | 20 | CO <sub>3</sub> <sup>2-</sup>  | 100 | 99  | 84   | 10.8  |

|                                                                               |               |                                                 |    |                                |     |     |            |      |
|-------------------------------------------------------------------------------|---------------|-------------------------------------------------|----|--------------------------------|-----|-----|------------|------|
| 251                                                                           | Crude         | Bu <sub>4</sub> NH <sub>2</sub> PO <sub>4</sub> | 20 | CO <sub>3</sub> <sup>2-</sup>  | 100 | 99  | 86.2       | 9.1  |
| 252                                                                           | Resolubilized | Bu <sub>4</sub> NH <sub>2</sub> PO <sub>4</sub> | 20 | CO <sub>3</sub> <sup>2-</sup>  | 100 | 99  | 84.7       | 11.2 |
| 253                                                                           | Crude         | Bu <sub>4</sub> NH <sub>2</sub> PO <sub>4</sub> | 20 | CO <sub>3</sub> <sup>2-</sup>  | 100 | 100 | 89.2       | 5.6  |
| 254                                                                           | Resolubilized | Bu <sub>4</sub> NH <sub>2</sub> PO <sub>4</sub> | 20 | CO <sub>3</sub> <sup>2-</sup>  | 100 | 100 | 87.9       | 6.9  |
| 255                                                                           | Crude         | Bu <sub>4</sub> NH <sub>2</sub> PO <sub>4</sub> | 20 | PO <sub>4</sub> <sup>3-</sup>  | 100 | 98  | 60.9       | 33.6 |
| 256                                                                           | Resolubilized | Bu <sub>4</sub> NH <sub>2</sub> PO <sub>4</sub> | 20 | PO <sub>4</sub> <sup>3-</sup>  | 100 | 98  | 59.7       | 34.5 |
| 257                                                                           | Crude         | Bu <sub>4</sub> NH <sub>2</sub> PO <sub>4</sub> | 20 | PO <sub>4</sub> <sup>3-</sup>  | 100 | 99  | 2.3        | 92.6 |
| 258                                                                           | Resolubilized | Bu <sub>4</sub> NH <sub>2</sub> PO <sub>4</sub> | 20 | PO <sub>4</sub> <sup>3-</sup>  | 100 | 99  | 2.4        | 91.9 |
| 259                                                                           | Crude         | Bu <sub>4</sub> NH <sub>2</sub> PO <sub>4</sub> | 20 | PO <sub>4</sub> <sup>3-</sup>  | 100 | 100 | 14         | 81.1 |
| 260                                                                           | Resolubilized | Bu <sub>4</sub> NH <sub>2</sub> PO <sub>4</sub> | 20 | PO <sub>4</sub> <sup>3-</sup>  | 100 | 100 | 13.2       | 82.4 |
| 261                                                                           | Crude         | Bu <sub>4</sub> NH <sub>2</sub> PO <sub>4</sub> | 20 | HPO <sub>4</sub> <sup>2-</sup> | 100 | 98  | 39.7       | 56.1 |
| 262                                                                           | Resolubilized | Bu <sub>4</sub> NH <sub>2</sub> PO <sub>4</sub> | 20 | HPO <sub>4</sub> <sup>2-</sup> | 100 | 98  | 38.2       | 58.1 |
| 263                                                                           | Crude         | Bu <sub>4</sub> NH <sub>2</sub> PO <sub>4</sub> | 20 | HPO <sub>4</sub> <sup>2-</sup> | 100 | 98  | 18.4       | 78.6 |
| 264                                                                           | Resolubilized | Bu <sub>4</sub> NH <sub>2</sub> PO <sub>4</sub> | 20 | HPO <sub>4</sub> <sup>2-</sup> | 100 | 98  | 19.7       | 76.3 |
| 265                                                                           | Crude         | Bu <sub>4</sub> NH <sub>2</sub> PO <sub>4</sub> | 20 | HPO <sub>4</sub> <sup>2-</sup> | 100 | 95  | 17.6       | 79.4 |
| 266                                                                           | Resolubilized | Bu <sub>4</sub> NH <sub>2</sub> PO <sub>4</sub> | 20 | HPO <sub>4</sub> <sup>2-</sup> | 100 | 95  | 17.6       | 79.4 |
| <b>Bu<sub>4</sub>NH<sub>2</sub>PO<sub>4</sub> elution in MeCN/tBuOH (5:1)</b> |               |                                                 |    |                                |     |     |            |      |
| 267                                                                           | Crude         | Bu <sub>4</sub> NH <sub>2</sub> PO <sub>4</sub> | 20 | HCO <sub>3</sub> <sup>-</sup>  | 100 | 97  | 18.9       | 71   |
| 268                                                                           | Resolubilized | Bu <sub>4</sub> NH <sub>2</sub> PO <sub>4</sub> | 20 | HCO <sub>3</sub> <sup>-</sup>  | 100 | 97  | 18.9       | 72.6 |
| 269                                                                           | Crude         | Bu <sub>4</sub> NH <sub>2</sub> PO <sub>4</sub> | 20 | CO <sub>3</sub> <sup>2-</sup>  | 100 | 97  | 14.3       | 82.2 |
| 270                                                                           | Resolubilized | Bu <sub>4</sub> NH <sub>2</sub> PO <sub>4</sub> | 20 | CO <sub>3</sub> <sup>2-</sup>  | 100 | 97  | 13.8       | 81.1 |
| 271                                                                           | Crude         | Bu <sub>4</sub> NH <sub>2</sub> PO <sub>4</sub> | 20 | PO <sub>4</sub> <sup>3-</sup>  | 100 | 98  | 4.4        | 91.1 |
| 272                                                                           | Resolubilized | Bu <sub>4</sub> NH <sub>2</sub> PO <sub>4</sub> | 20 | PO <sub>4</sub> <sup>3-</sup>  | 100 | 98  | 4.8        | 87.1 |
| 273                                                                           | Crude         | Bu <sub>4</sub> NH <sub>2</sub> PO <sub>4</sub> | 20 | HPO <sub>4</sub> <sup>2-</sup> | 100 | 94  | 16.6       | 76.9 |
| 274                                                                           | Resolubilized | Bu <sub>4</sub> NH <sub>2</sub> PO <sub>4</sub> | 20 | HPO <sub>4</sub> <sup>2-</sup> | 100 | 94  | 15.6       | 77.7 |
| <b>Et<sub>4</sub>NHCO<sub>3</sub> elution in MeCN</b>                         |               |                                                 |    |                                |     |     |            |      |
| 275                                                                           | Crude         | Et <sub>4</sub> NHCO <sub>3</sub>               | 20 | HCO <sub>3</sub> <sup>-</sup>  | 100 | 96  | TLC Failed |      |
| 276                                                                           | Resolubilized | Et <sub>4</sub> NHCO <sub>3</sub>               | 20 | HCO <sub>3</sub> <sup>-</sup>  | 100 | 96  | 82.3       | 12.6 |
| 277                                                                           | Crude         | Et <sub>4</sub> NHCO <sub>3</sub>               | 20 | HCO <sub>3</sub> <sup>-</sup>  | 100 | 95  | 83.7       | 8.6  |
| 278                                                                           | Resolubilized | Et <sub>4</sub> NHCO <sub>3</sub>               | 20 | HCO <sub>3</sub> <sup>-</sup>  | 100 | 95  | 79.6       | 13.4 |
| 279                                                                           | Crude         | Et <sub>4</sub> NHCO <sub>3</sub>               | 20 | HCO <sub>3</sub> <sup>-</sup>  | 100 | 94  | 82.7       | 12.2 |
| 280                                                                           | Resolubilized | Et <sub>4</sub> NHCO <sub>3</sub>               | 20 | HCO <sub>3</sub> <sup>-</sup>  | 100 | 94  | 71.6       | 24.1 |
| 281                                                                           | Crude         | Et <sub>4</sub> NHCO <sub>3</sub>               | 20 | CO <sub>3</sub> <sup>2-</sup>  | 100 | 100 | 83.9       | 9.7  |
| 282                                                                           | Resolubilized | Et <sub>4</sub> NHCO <sub>3</sub>               | 20 | CO <sub>3</sub> <sup>2-</sup>  | 100 | 100 | 73.3       | 21.3 |
| 283                                                                           | Crude         | Et <sub>4</sub> NHCO <sub>3</sub>               | 20 | CO <sub>3</sub> <sup>2-</sup>  | 100 | 100 | 85.9       | 9    |
| 284                                                                           | Resolubilized | Et <sub>4</sub> NHCO <sub>3</sub>               | 20 | CO <sub>3</sub> <sup>2-</sup>  | 100 | 100 | 77.5       | 16.7 |
| 285                                                                           | Crude         | Et <sub>4</sub> NHCO <sub>3</sub>               | 20 | CO <sub>3</sub> <sup>2-</sup>  | 100 | 100 | 91.1       | 4.7  |
| 286                                                                           | Resolubilized | Et <sub>4</sub> NHCO <sub>3</sub>               | 20 | CO <sub>3</sub> <sup>2-</sup>  | 100 | 100 | 74.2       | 22.1 |
| 287                                                                           | Crude         | Et <sub>4</sub> NHCO <sub>3</sub>               | 20 | PO <sub>4</sub> <sup>3-</sup>  | 100 | 96  | 93.5       | 3.5  |
| 288                                                                           | Resolubilized | Et <sub>4</sub> NHCO <sub>3</sub>               | 20 | PO <sub>4</sub> <sup>3-</sup>  | 100 | 96  | 86.3       | 10.4 |
| 289                                                                           | Crude         | Et <sub>4</sub> NHCO <sub>3</sub>               | 20 | PO <sub>4</sub> <sup>3-</sup>  | 100 | 98  | 77.2       | 14.7 |
| 290                                                                           | Resolubilized | Et <sub>4</sub> NHCO <sub>3</sub>               | 20 | PO <sub>4</sub> <sup>3-</sup>  | 100 | 98  | 73.1       | 17.4 |
| 291                                                                           | Crude         | Et <sub>4</sub> NHCO <sub>3</sub>               | 20 | PO <sub>4</sub> <sup>3-</sup>  | 100 | 99  | 88.3       | 5.5  |
| 292                                                                           | Resolubilized | Et <sub>4</sub> NHCO <sub>3</sub>               | 20 | PO <sub>4</sub> <sup>3-</sup>  | 100 | 99  | 81.4       | 12.8 |
| 293                                                                           | Crude         | Et <sub>4</sub> NHCO <sub>3</sub>               | 20 | HPO <sub>4</sub> <sup>2-</sup> | 100 | 97  | 91.4       | 4.9  |
| 294                                                                           | Resolubilized | Et <sub>4</sub> NHCO <sub>3</sub>               | 20 | HPO <sub>4</sub> <sup>2-</sup> | 100 | 97  | 87.8       | 8.1  |
| 295                                                                           | Crude         | Et <sub>4</sub> NHCO <sub>3</sub>               | 20 | HPO <sub>4</sub> <sup>2-</sup> | 100 | 95  | 76.8       | 23.2 |
| 296                                                                           | Resolubilized | Et <sub>4</sub> NHCO <sub>3</sub>               | 20 | HPO <sub>4</sub> <sup>2-</sup> | 100 | 95  | 67.9       | 32.1 |
| 297                                                                           | Crude         | Et <sub>4</sub> NHCO <sub>3</sub>               | 20 | HPO <sub>4</sub> <sup>2-</sup> | 100 | 97  | 74.4       | 25.6 |
| 298                                                                           | Resolubilized | Et <sub>4</sub> NHCO <sub>3</sub>               | 20 | HPO <sub>4</sub> <sup>2-</sup> | 100 | 97  | 71.9       | 28.1 |
| <b>Et<sub>4</sub>NHCO<sub>3</sub> elution in DMSO</b>                         |               |                                                 |    |                                |     |     |            |      |

|                                                                   |               |                                   |    |                                |     |     |      |      |
|-------------------------------------------------------------------|---------------|-----------------------------------|----|--------------------------------|-----|-----|------|------|
| 299                                                               | Crude         | Et <sub>4</sub> NHCO <sub>3</sub> | 20 | HCO <sub>3</sub> <sup>-</sup>  | 100 | 95  | 86.6 | 7.4  |
| 300                                                               | Resolubilized | Et <sub>4</sub> NHCO <sub>3</sub> | 20 | HCO <sub>3</sub> <sup>-</sup>  | 100 | 95  | 74.6 | 18.7 |
| 301                                                               | Crude         | Et <sub>4</sub> NHCO <sub>3</sub> | 20 | HCO <sub>3</sub> <sup>-</sup>  | 100 | 93  | 84.9 | 8.7  |
| 302                                                               | Resolubilized | Et <sub>4</sub> NHCO <sub>3</sub> | 20 | HCO <sub>3</sub> <sup>-</sup>  | 100 | 93  | 78   | 16.9 |
| 303                                                               | Crude         | Et <sub>4</sub> NHCO <sub>3</sub> | 20 | HCO <sub>3</sub> <sup>-</sup>  | 100 | 94  | 82.7 | 12.2 |
| 304                                                               | Resolubilized | Et <sub>4</sub> NHCO <sub>3</sub> | 20 | HCO <sub>3</sub> <sup>-</sup>  | 100 | 94  | 71.6 | 24.1 |
| 305                                                               | Crude         | Et <sub>4</sub> NHCO <sub>3</sub> | 20 | CO <sub>3</sub> <sup>2-</sup>  | 100 | 100 | 63.2 | 33.9 |
| 306                                                               | Resolubilized | Et <sub>4</sub> NHCO <sub>3</sub> | 20 | CO <sub>3</sub> <sup>2-</sup>  | 100 | 100 | 52.3 | 43   |
| 307                                                               | Crude         | Et <sub>4</sub> NHCO <sub>3</sub> | 20 | CO <sub>3</sub> <sup>2-</sup>  | 100 | 100 | 75.3 | 21   |
| 308                                                               | Resolubilized | Et <sub>4</sub> NHCO <sub>3</sub> | 20 | CO <sub>3</sub> <sup>2-</sup>  | 100 | 100 | 54.6 | 41   |
| 309                                                               | Crude         | Et <sub>4</sub> NHCO <sub>3</sub> | 20 | CO <sub>3</sub> <sup>2-</sup>  | 100 | 99  | 80   | 12.8 |
| 310                                                               | Resolubilized | Et <sub>4</sub> NHCO <sub>3</sub> | 20 | CO <sub>3</sub> <sup>2-</sup>  | 100 | 99  | 68   | 23.4 |
| 311                                                               | Crude         | Et <sub>4</sub> NHCO <sub>3</sub> | 20 | PO <sub>4</sub> <sup>3-</sup>  | 100 | 95  | 89.9 | 4.4  |
| 312                                                               | Resolubilized | Et <sub>4</sub> NHCO <sub>3</sub> | 20 | PO <sub>4</sub> <sup>3-</sup>  | 100 | 95  | 82.9 | 9.7  |
| 313                                                               | Crude         | Et <sub>4</sub> NHCO <sub>3</sub> | 20 | PO <sub>4</sub> <sup>3-</sup>  | 100 | 100 | 87.8 | 7.6  |
| 314                                                               | Resolubilized | Et <sub>4</sub> NHCO <sub>3</sub> | 20 | PO <sub>4</sub> <sup>3-</sup>  | 100 | 100 | 80.8 | 13.3 |
| 315                                                               | Crude         | Et <sub>4</sub> NHCO <sub>3</sub> | 20 | PO <sub>4</sub> <sup>3-</sup>  | 100 | 100 | 86.6 | 9.1  |
| 316                                                               | Resolubilized | Et <sub>4</sub> NHCO <sub>3</sub> | 20 | PO <sub>4</sub> <sup>3-</sup>  | 100 | 100 | 76   | 19.4 |
| 317                                                               | Crude         | Et <sub>4</sub> NHCO <sub>3</sub> | 20 | HPO <sub>4</sub> <sup>2-</sup> | 100 | 96  | 88.8 | 7.3  |
| 318                                                               | Resolubilized | Et <sub>4</sub> NHCO <sub>3</sub> | 20 | HPO <sub>4</sub> <sup>2-</sup> | 100 | 96  | 83   | 12.4 |
| 319                                                               | Crude         | Et <sub>4</sub> NHCO <sub>3</sub> | 20 | HPO <sub>4</sub> <sup>2-</sup> | 100 | 100 | 83.9 | 13.3 |
| 320                                                               | Resolubilized | Et <sub>4</sub> NHCO <sub>3</sub> | 20 | HPO <sub>4</sub> <sup>2-</sup> | 100 | 100 | 81.8 | 14.3 |
| 321                                                               | Crude         | Et <sub>4</sub> NHCO <sub>3</sub> | 20 | HPO <sub>4</sub> <sup>2-</sup> | 100 | 98  | 85   | 7.2  |
| 322                                                               | Resolubilized | Et <sub>4</sub> NHCO <sub>3</sub> | 20 | HPO <sub>4</sub> <sup>2-</sup> | 100 | 98  | 84.2 | 8.6  |
| <b>Et<sub>4</sub>NHCO<sub>3</sub> elution in tBuOH/MeCN (5:1)</b> |               |                                   |    |                                |     |     |      |      |
| 323                                                               | Crude         | Et <sub>4</sub> NHCO <sub>3</sub> | 20 | HCO <sub>3</sub> <sup>-</sup>  | 100 | 95  | 15.2 | 76.6 |
| 324                                                               | Resolubilized | Et <sub>4</sub> NHCO <sub>3</sub> | 20 | HCO <sub>3</sub> <sup>-</sup>  | 100 | 95  | 14.1 | 76.3 |
| 325                                                               | Crude         | Et <sub>4</sub> NHCO <sub>3</sub> | 20 | CO <sub>3</sub> <sup>2-</sup>  | 100 | 95  | 7.8  | 89.6 |
| 326                                                               | Resolubilized | Et <sub>4</sub> NHCO <sub>3</sub> | 20 | CO <sub>3</sub> <sup>2-</sup>  | 100 | 95  | 8.1  | 88.3 |
| 327                                                               | Crude         | Et <sub>4</sub> NHCO <sub>3</sub> | 20 | PO <sub>4</sub> <sup>3-</sup>  | 100 | 95  | 13.8 | 79.1 |
| 328                                                               | Resolubilized | Et <sub>4</sub> NHCO <sub>3</sub> | 20 | PO <sub>4</sub> <sup>3-</sup>  | 100 | 95  | 14   | 78.3 |
| 329                                                               | Crude         | Et <sub>4</sub> NHCO <sub>3</sub> | 20 | HPO <sub>4</sub> <sup>2-</sup> | 100 | 94  | 9.3  | 87.3 |
| 330                                                               | Resolubilized | Et <sub>4</sub> NHCO <sub>3</sub> | 20 | HPO <sub>4</sub> <sup>2-</sup> | 100 | 94  | 8.6  | 87.9 |

## Control experiments

### Longer reaction times for [<sup>18</sup>F]3

The reactions were conducted according to the general procedure for manual radiolabeling as described above. Reaction was performed using Bu<sub>4</sub>NOMs (20 mM) solutions for elution. The only major difference could be seen using the carbonate preconditioning anions were the pRCY increased from 5-10 minutes in MeCN and DMSO (*Figure S14*).

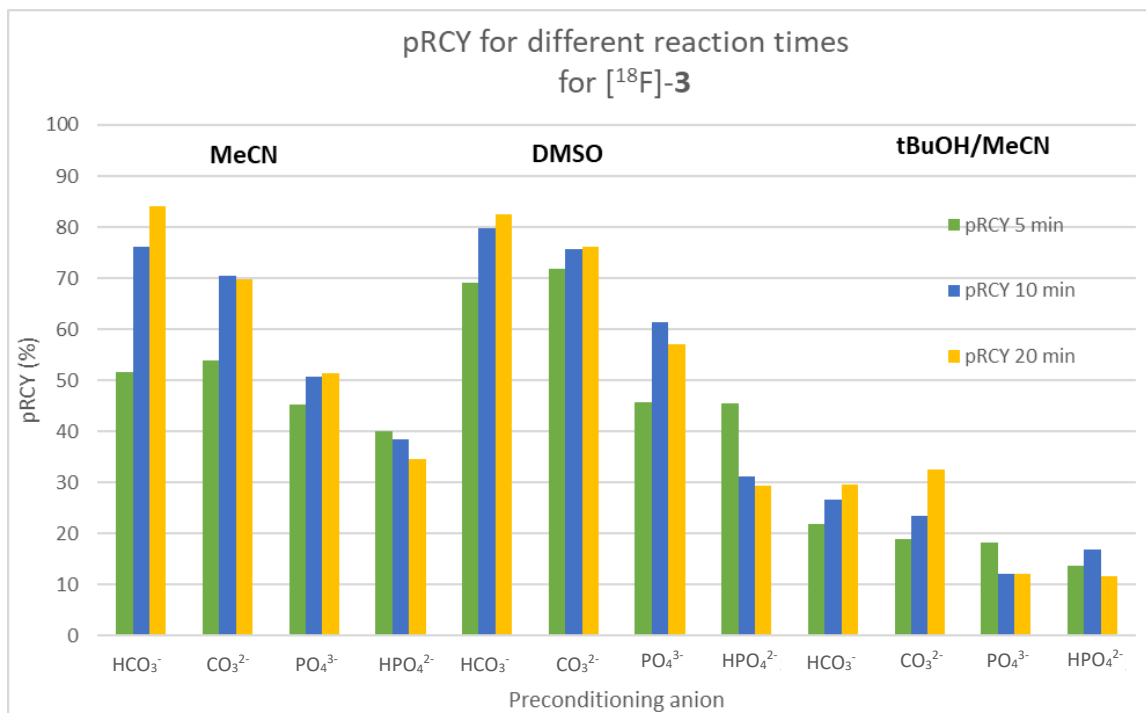

Figure S14 pRCY of [18F]-3 at different time points.

### Remaining precursor analysis

The amount of precursor **2** remaining after the radiolabeling reaction was investigated for the same reactions by integrating the corresponding UV peak (254 nm, rt: 11.45 min) in the analytical chromatograms from the resolubilized samples. The concentration was calculated as a percentage of the original concentration of **2** (1 mg/mL) compensated for the dilution from quenching and dilution in the analytical HPLC vial. The data is plotted in *Figure S15*.

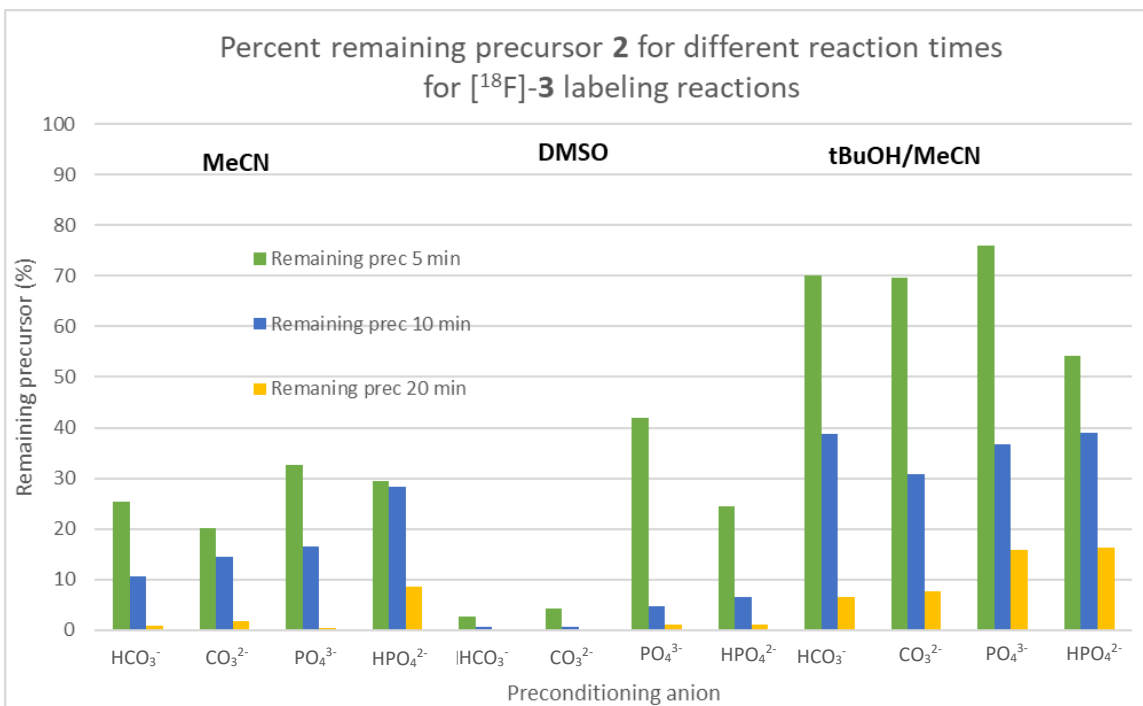

**Figure S15** Percentage of remaining precursor 2 at the end of the radiolabeling reaction for different time points.

### Testing different concentrations of precursor 2

Results from using higher and lower amounts of precursor for radiolabeling using conditions 4A in MeCN for precursor 2 to form [<sup>18</sup>F]3 can be seen in *Figure S16*.

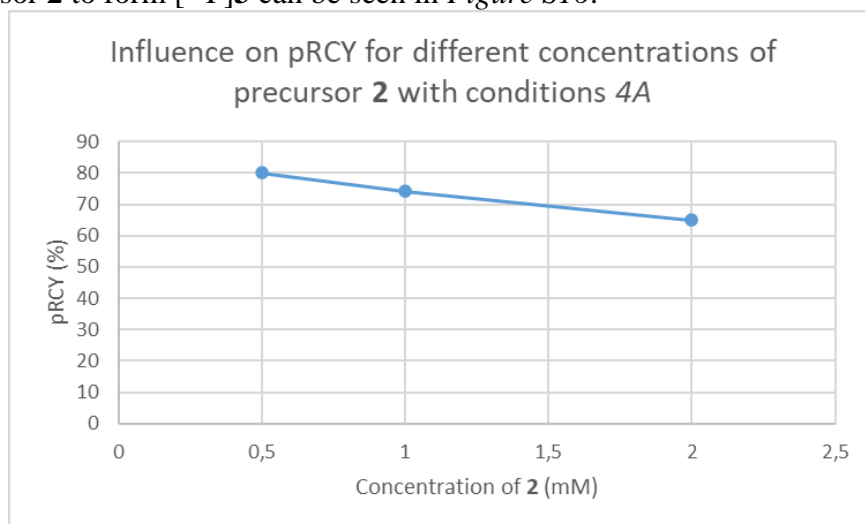

**Figure S16** Influence on concentration of precursor 2 on the pRCY for [<sup>18</sup>F]3.

### Temperature screening

A screening of different temperatures was made for different eluting anions using the general method for manual radiolabeling with 2 to form [<sup>18</sup>F]3 with a PO<sub>4</sub><sup>3-</sup> preconditioned QMA with MeCN as a reaction solvent. The results from the experiments can be seen in *Figure S17*.

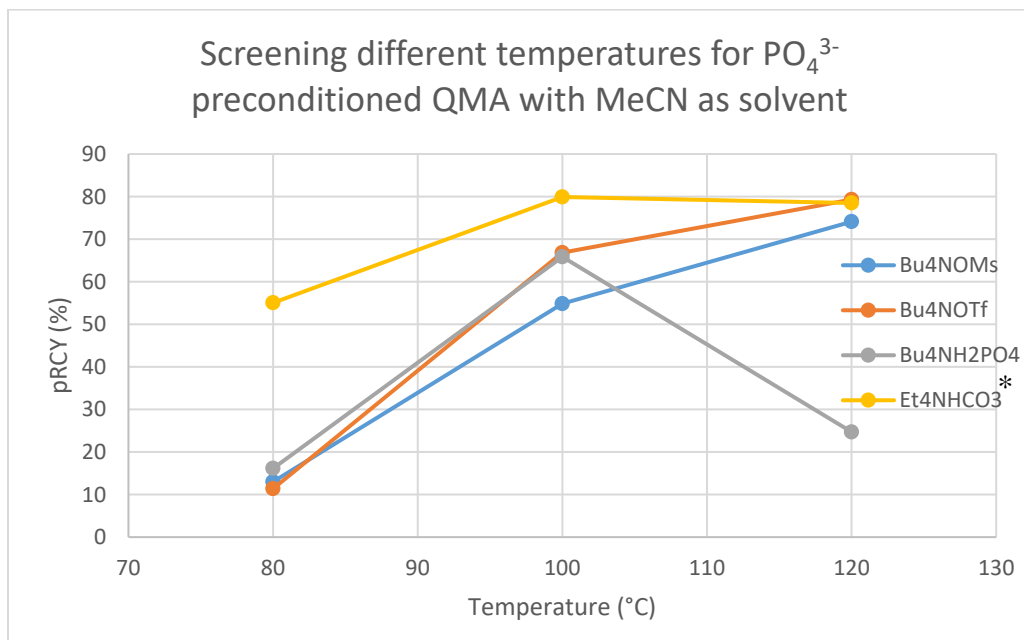

**Figure S17** Results from screening of different temperatures using different eluting anions. \*pRCY using 4C had a very high variability and thus no major conclusions could be drawn without further repetitions.

### Leaving group screening

In order to test different how leaving groups influence of the pRCY in some of the derived conditions to form [<sup>18</sup>F]3 a set of new precursors were synthesized (*Scheme S1*)

The precursors were radiolabeled according to the general procedure for manual radiolabeling. To different derived conditions that were high yielding using the original tosylate precursor 2 (3C and 4A) were tested with the new precursors (*Figure S18*)

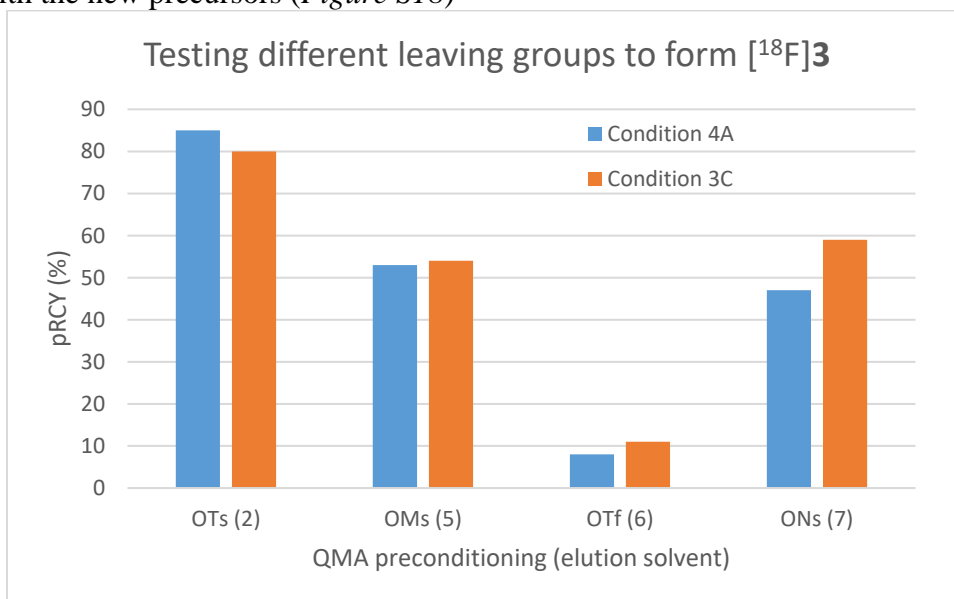

**Figure S18** Results from radiolabeling reactions with precursors 5, 6 and 7 compared with the original tosylate precursor 2.

### Switching eluting solvent

The reactions were conducted according to the general procedure for manual radiolabeling as described above. MeOH was used as solvent for elution instead of MeCN/H<sub>2</sub>O resulting in a higher or comparable pRCY all the tested reactions, see *Figure S19*. Screening was conducted for Bu<sub>4</sub>NOMs elution of all preconditioning anions in MeCN as well as for the conditions used for subsequent labelling of clinical tracers/synthons.

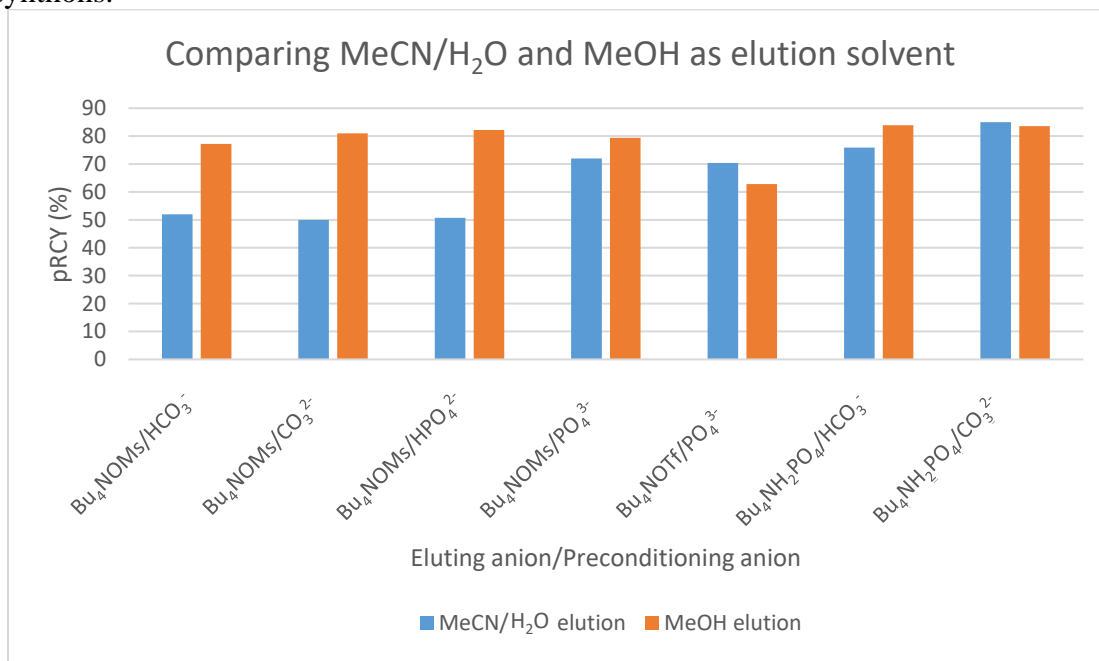

**Figure S19** Switching to MeOH as a solvent for elution with Bu<sub>4</sub>NOTf instead of MeCN/H<sub>2</sub>O.

## Automated radiosynthesis of clinically relevant tracers and synthons

### Determination of molar activity (A<sub>m</sub>)

The reference compound was dissolved in MeCN (1.0 mg/mL). A dilution series (10-fold dilution per sample) was made by diluting 100 μL of the concentrated solution in 900 μL of MeCN (1 mg/mL-0.0001 mg/mL). The samples were injected (10 μL) on the same analytical HPLC (using the general method for analytical HPLC) as the formulated tracers on the same day as the synthesis. The UV-trace of the chromatograms (wavelength specified for each tracer) were analyzed and the peak corresponding to the reference compound was integrated. The area under the curve was plotted in Excel and formula from the linear regression was used to determine the concentration of cold compound in the formulated tracer solutions. The concentration of radioactivity in the formulated tracers was determined by measuring the activity in a dose calibrator and dividing by the volume of the formulated tracer. Samples of 10 μL of the formulated tracers was injected and the decay corrected activity concentration was divided by the cold tracer concentration determined by the UV-trace and calculated from the standard curves. For dosimetry purposes and to be able to perform multiple syntheses in sequence relatively low starting activities (1-6 GBq) was used resulting in a slightly lower A<sub>m</sub> than could be expected in clinical production.



### Standard curves for determination of molar activity

The standard curves plotted for the different reference compounds is shown below, the x-axis has been zoomed in in order to better display the lower concentration data points. Linear regression is showed as the dashed line, the derived equation is displayed in the top left corner of the graph. Molar activity for [<sup>18</sup>F]FE-PE2I was determined by comparing to three injections of samples containing 1 µg/mL in accordance with the routine procedures for production of the tracer.

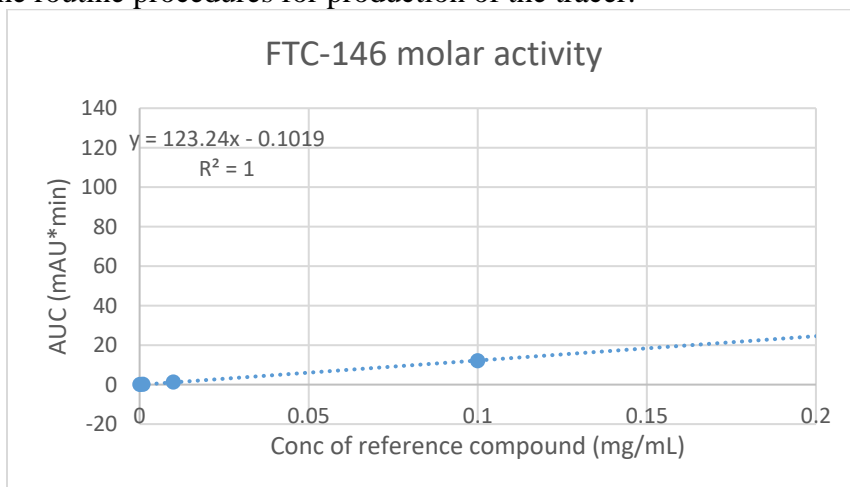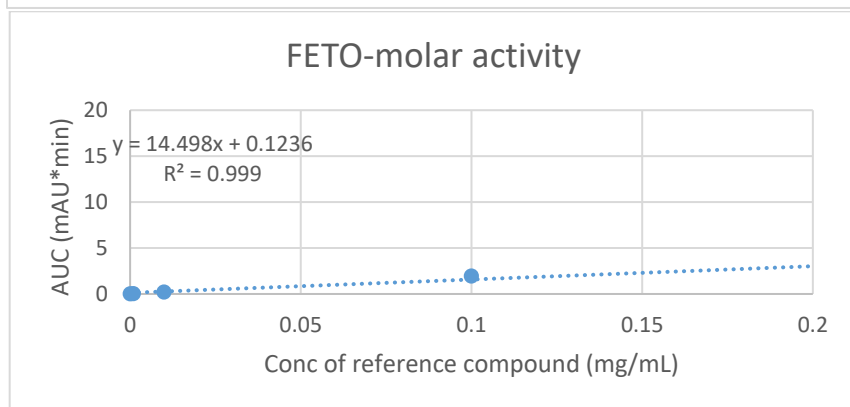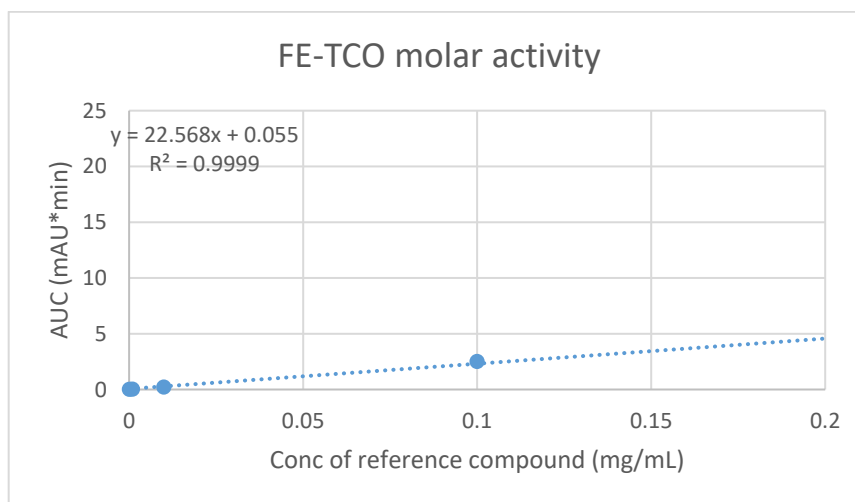

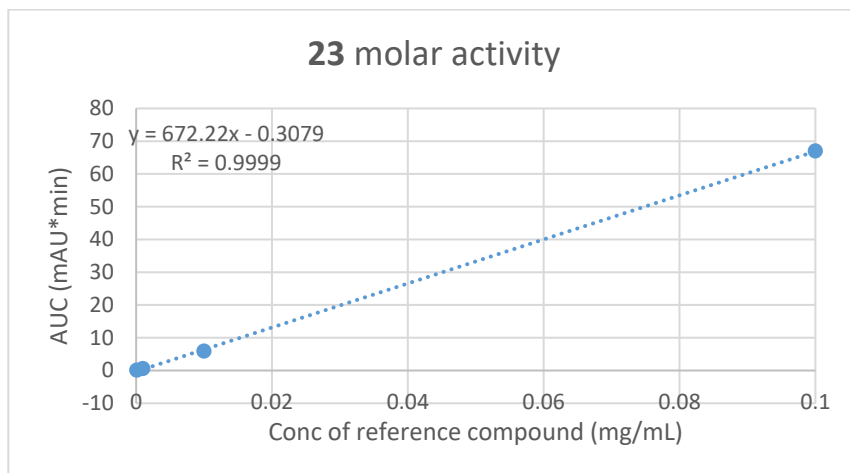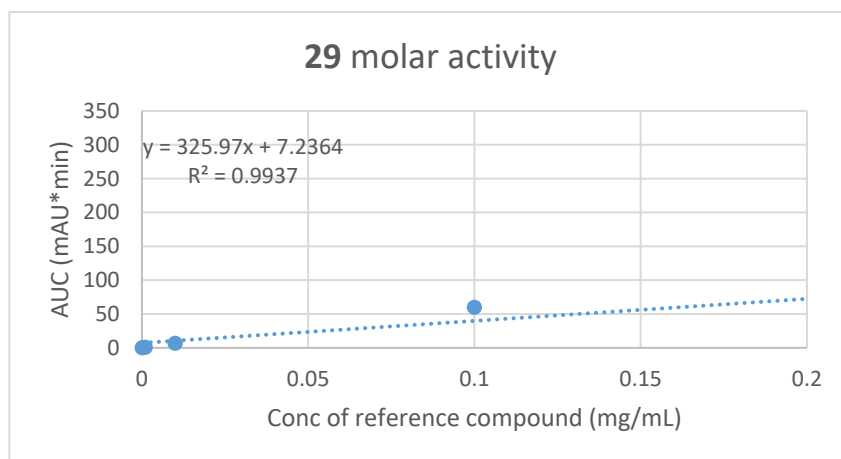

**Figure S20** Calibration curves for molar activity of radiolabeled tracers. Curves zoomed in for clarity.

## General method for automated radiosynthesis

The automated radiosynthesis was carried out using a Scansys research synthesis module (Scansys Laboratorieteknik) (*Scheme S8*). The  $^{18}\text{F}$ -target water was received in the  $^{18}\text{F}$ -receiving vial and subsequently trapped on the preconditioned QMA via vacuum over V.7, V.6 and V.2 removing the  $^{18}\text{O}$ -water to the  $^{18}\text{O}$ -waste. Once all the activity had been transferred the QMA-elution solution was passed over the QMA by helium flow (30 mL/min) eluting the activity via V.6. and V.5 while opening V.4 for ventilation to Reactor 1 for 40 seconds. Reactor 1 was then heated to 100 °C and the helium flow was increased to 500 mL/min for 3 min. Subsequently V.4 was closed and a vacuum was applied over the reactor via V.3 and V.2 while increasing the helium flow to 900 mL/min for 2 min. Once the reaction vial was dry the Robotic needle was used to transfer the precursor from the precursor vial to the reaction vial and the reaction was heated to the designated reaction temperature. The reaction was then cooled to 60 °C by airflow and the reaction was diluted with 0.1% TFA in  $\text{H}_2\text{O}$  (3 mL) from the dilution vial using the Robotic needle. The diluted reaction mixture was then injected on the preparative HPLC using the Robotic needle. Once the peak corresponding to the desired product was observed on the radio detector V.8 was used to collect the fraction to dilution vial 2 (100 mL), previously prepared with ca 60 mL  $\text{H}_2\text{O}$  for dilution. The lines were flushed by helium from V.9 which was then bubbled through the solution for mixing with V.11 open for ventilation. The diluted fraction was then transferred over a C18-cartridge by applying a pressure from V.9 using 1000 mL/min of helium. When all the activity had been trapped on the C18 V.10 was switched and the activity was eluted with 1 mL of EtOH with a helium flow (100 mL/min) eluting the desired product to the product vial previously prepared with the appropriate formulation solution.

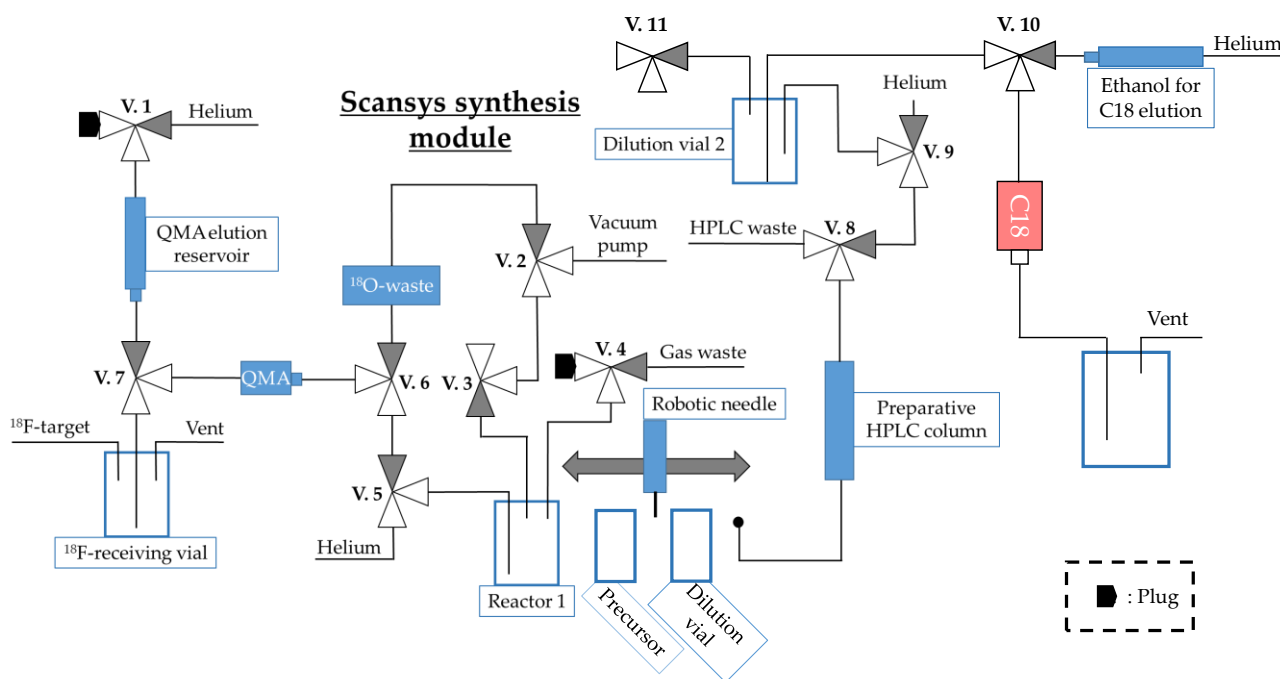

**Scheme S8.** Flowchart for the Scansys automated synthesis module used for automated reactions.

## [<sup>18</sup>F]FE-PE2I

The precursor and reference compound were purchased from PharmaSynth AS (Tartu Estonia). Manual radiosynthesis: The synthesis was performed according to the general procedure for manual labeling. Synthesis specific details:

**Table S11.** Details for [<sup>18</sup>F]FE-PE2I synthesis

| Original procedure (Rigshospitalet, Copenhagen) |                                                                                                     |
|-------------------------------------------------|-----------------------------------------------------------------------------------------------------|
| Preconditioning of QMA                          | K <sub>2</sub> CO <sub>3</sub> (0.5M, 10 mL)                                                        |
| Elution of QMA                                  | K <sub>2</sub> CO <sub>3</sub> (7.8 μmol) K <sub>222</sub> (15.1 μmol), MeOH/H <sub>2</sub> O 72:18 |
| Reaction solvent and precursor concentration    | DMSO (1 mL), 1.0 mg (1.6 μmol)                                                                      |
| Reaction time and temperature                   | 135 °C, 3 min                                                                                       |
| Derived conditions (4A)                         |                                                                                                     |
| Preconditioning of QMA                          | K <sub>3</sub> PO <sub>4</sub> (0.5M, 10 mL)                                                        |
| Elution of QMA                                  | Bu <sub>4</sub> NOMs (20 μmol), MeCN/H <sub>2</sub> O, 50:50                                        |
| Reaction solvent and precursor concentration    | DMSO (1 mL), 1.0 mg (1.6 μmol)                                                                      |
| Reaction time and temperature                   | 120 °C, 5 min                                                                                       |

Automated synthesis: Synthesis was performed on a Scansys research module (Scansys Laboratorieteknik), reaction conditions from manual radiosynthesis (4A) were used. The reaction vial was quenched using 3 mL sodium ascorbate/ascorbic acid buffer (25 mM, pH 4.3). Purification by semipreparative HPLC using Onyx™ Monolithic Semi-Prep C18 (LC Column 100 x 10 mm), isocratic method (18% EtOH in sodium ascorbate/ascorbic acid buffer, 25 mM, pH 4.3, 6 mL/min, rt: 11 min). The fraction (10 mL) was collected in a 20 mL vial and diluted to a total volume of 20 mL with sterile water. Analytical HPLC for Manual radiosynthesis according to the general procedure, UV detection at 220 nm, rt (radio): 9.20 min. TLC eluent: n-heptane/EtOAc, 33:66, rf: 0.7. RCY: 47.8±7.9%, A<sub>m</sub>: 110.8 – 762.2 GBq/μmol. (Higher value was a result of a high activity synthesis starting from 71 GBq)

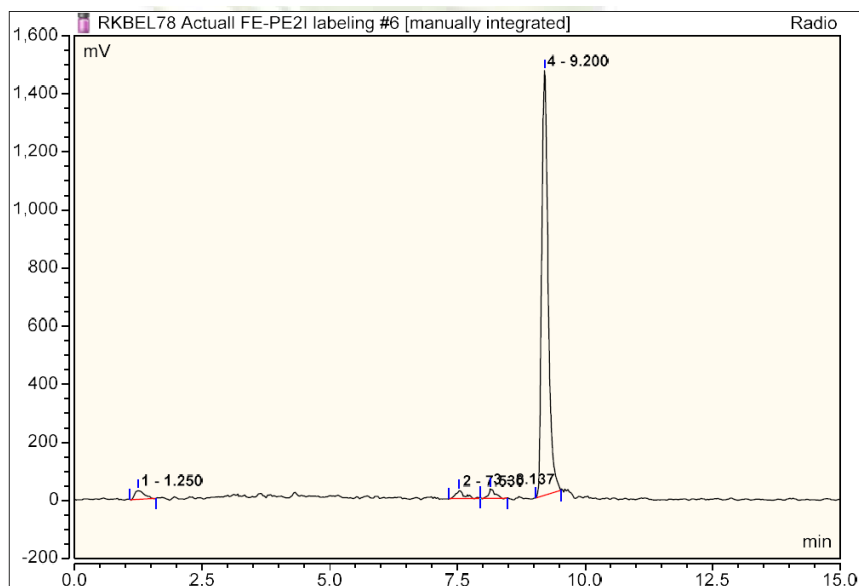

**Figure S21.** Analytical HPLC chromatogram of crude product (manual labeling), rt: 9.20 min.

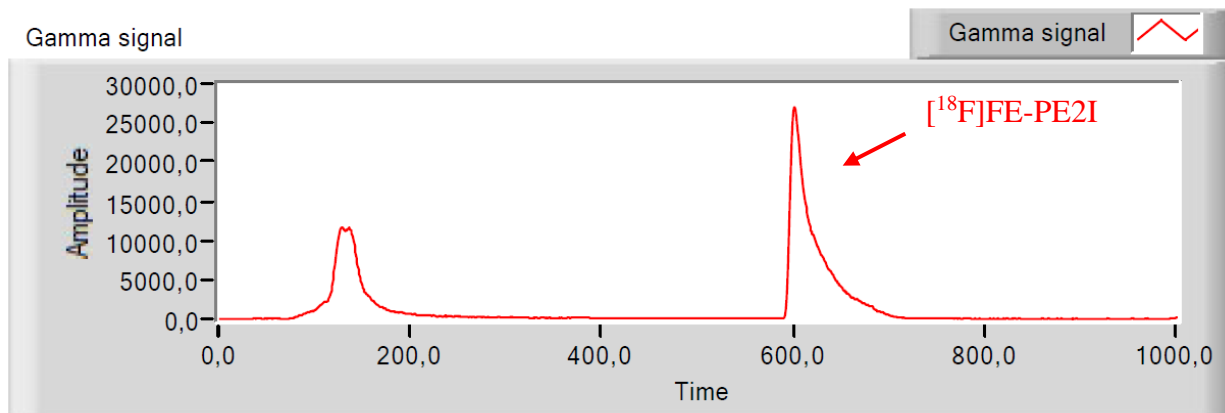

**Figure S22.** Preparative HPLC chromatogram of automated synthesis, rt: 10.0 min.

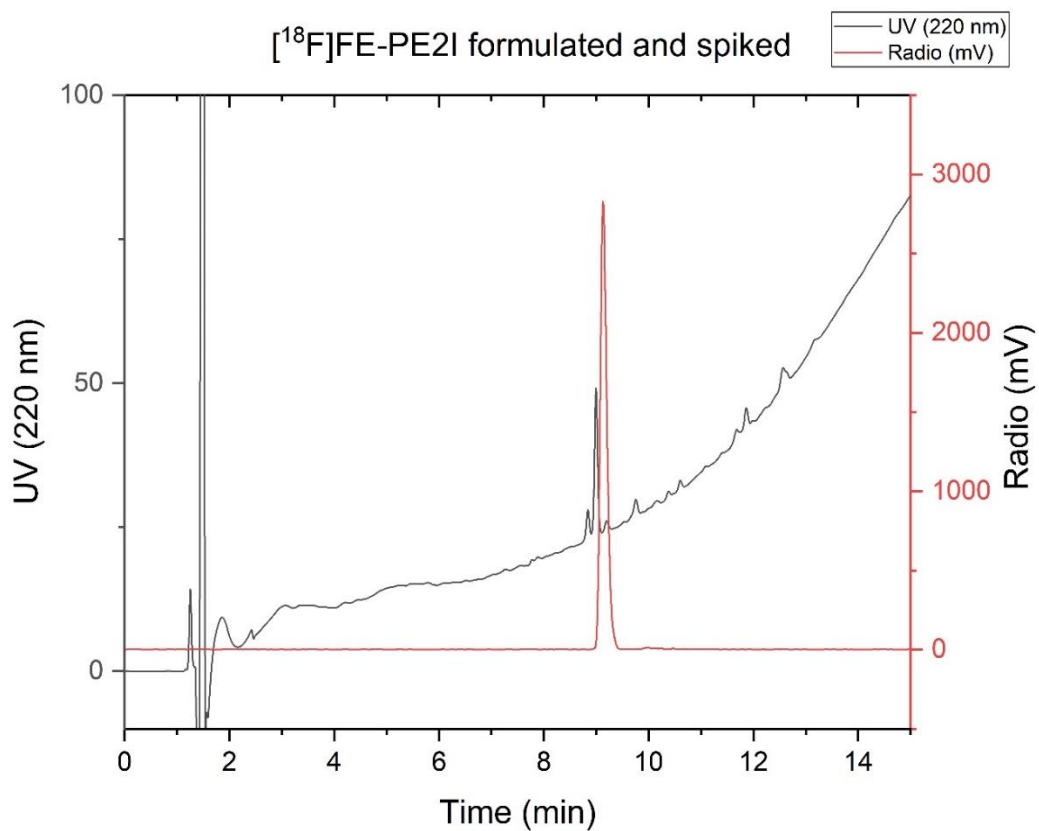

**Figure S23.** Analytical HPLC of formulated product [<sup>18</sup>F]FE-PE2I, spiked with <sup>19</sup>F-reference.

## [<sup>18</sup>F]FETO

The carboxylate precursor **9** and reference compound were purchased from ABX (Radeberg, Germany) and the tosylate precursor **10** was made in two steps according to *Scheme S3*. Manual radiosynthesis: The synthesis was performed according to the general procedure for manual labeling. Synthesis specific details:

**Table S12.** Details for [<sup>18</sup>F]FETO synthesis

| Original procedure (Rahman et. al.) <sup>7</sup> |                                                                                                      |
|--------------------------------------------------|------------------------------------------------------------------------------------------------------|
| Preconditioning of QMA                           | K <sub>2</sub> CO <sub>3</sub> (0.5M, 10 mL)                                                         |
| Elution of QMA                                   | K <sub>2</sub> CO <sub>3</sub> (25.0 μmol) K <sub>222</sub> (26.6 μmol), MeCN/H <sub>2</sub> O 66:33 |
| Reaction solvent and precursor concentration     | DMF (0.5 mL), 5.0 mg (12.1 μmol)                                                                     |
| Reaction time and temperature                    | 110 °C, 10 min                                                                                       |
| Derived conditions (IC)                          |                                                                                                      |
| Preconditioning of QMA                           | KHCO <sub>3</sub> (0.5M, 10 mL)                                                                      |
| Elution of QMA                                   | Bu <sub>4</sub> NH <sub>2</sub> PO <sub>4</sub> (20 μmol), MeOH                                      |
| Reaction solvent and precursor concentration     | DMSO (1 mL), 1.3 mg (3.1 μmol)                                                                       |
| Reaction time and temperature                    | 120 °C, 5 min                                                                                        |

Automated synthesis: Synthesis was performed on a Scansys research module (Scansys Laboratorieteknik) reaction conditions from Manual radiosynthesis (IC) were used. Reaction was quenched with 2 mL H<sub>2</sub>O. Purification using semipreparative HPLC, with a C-18 column (Luna® 5μm C18(2) 100Å, 250 x 10 mm) used an isocratic method (70% MeOH in 25 mM NaH<sub>2</sub>PO<sub>4</sub>, 3.0 mL/min, rt: 11.5 min. Fraction was collected in 60 mL H<sub>2</sub>O and applied to a Sep-Pak C18 Plus and subsequently formulated by eluting with 1 mL EtOH into 9 mL sterile water for injection. Analytical HPLC for manual and automated synthesis according to the general procedure. UV detection at 254 nm, rt (radio): 7.02 min, TLC eluent: n-heptane/EtOAc, 33:66, rf: 0.4. RCY: 54.5±7.0%, A<sub>m</sub>: 4.42 ± 1.81 GBq/μmol.

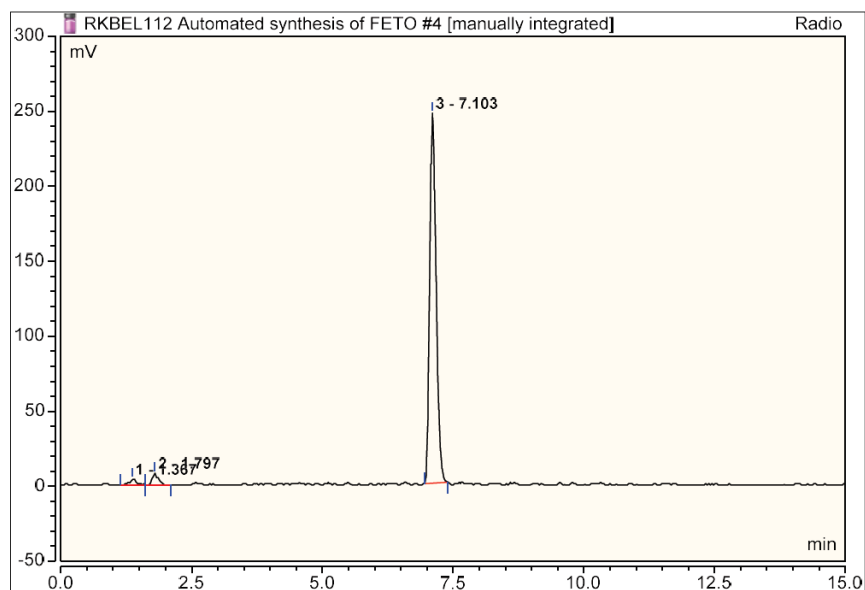

**Figure S24.** Analytical HPLC chromatogram of crude product, rt: 8.34 min.

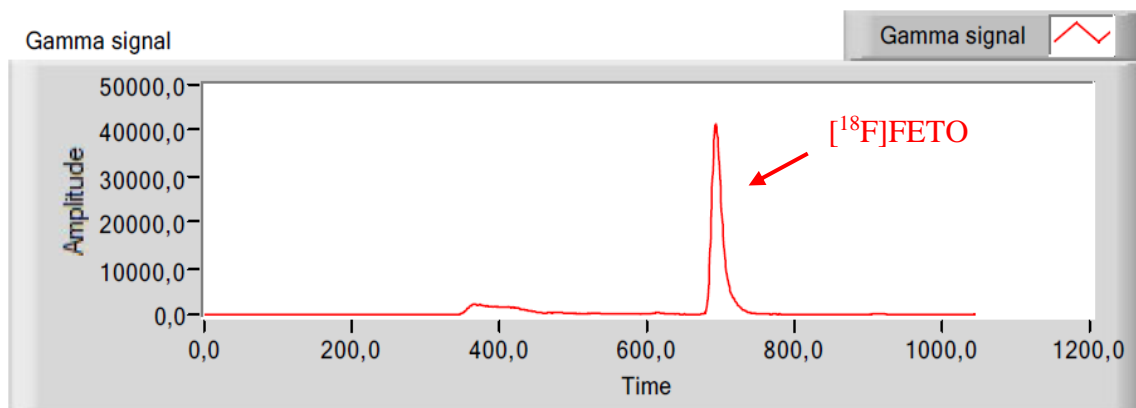

**Figure S25.** Preparative HPLC chromatogram of automated synthesis, rt: 11.5 min.

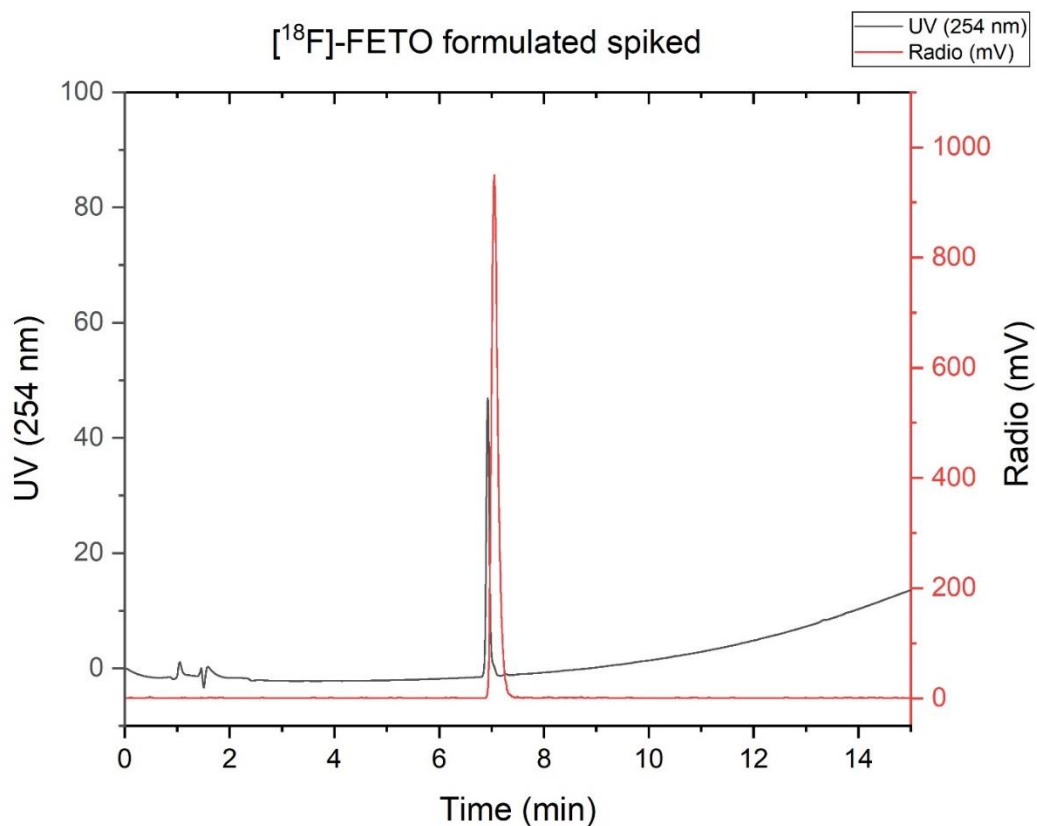

**Figure S26.** Analytical HPLC of formulated product [<sup>18</sup>F]FETO, spiked with <sup>19</sup>F-reference.

### [<sup>18</sup>F]FTC-146

The alcohol precursor and reference compound were purchased from Merck and the tosylate precursor **12** was synthesized in one step according to *Scheme S4*. Manual radiosynthesis: The synthesis was performed according to the general procedure for manual labeling. Synthesis specific details:

**Table S13.** Details for [<sup>18</sup>F]FTC-146 synthesis

| Original procedure (Collins et. al.) <sup>3</sup> |                                                                                                      |
|---------------------------------------------------|------------------------------------------------------------------------------------------------------|
| Preconditioning of QMA                            | K <sub>2</sub> CO <sub>3</sub> (0.5M, 10 mL)                                                         |
| Elution of QMA                                    | K <sub>2</sub> CO <sub>3</sub> (25.4 μmol) K <sub>222</sub> (40.0 μmol), MeCN/H <sub>2</sub> O 90:10 |
| Reaction solvent and precursor concentration      | DMSO (1 mL), 3.0 mg (6.1 μmol)                                                                       |
| Reaction time and temperature                     | 185 °C, 15 min                                                                                       |
| Derived conditions (3C)                           |                                                                                                      |
| Preconditioning of QMA                            | K <sub>2</sub> CO <sub>3</sub> (0.5M, 10 mL)                                                         |
| Elution of QMA                                    | Bu <sub>4</sub> NH <sub>2</sub> PO <sub>4</sub> (20 μmol), MeOH                                      |
| Reaction solvent and precursor concentration      | DMSO (1 mL), 1.5 mg (3.1 μmol)                                                                       |
| Reaction time and temperature                     | 120 °C, 5 min                                                                                        |

Automated synthesis: Synthesis was performed on a Scansys research module (Scansys Laboratorieteknik) reaction conditions from Manual radiosynthesis (3C) were used. Reaction was quenched with 2 mL H<sub>2</sub>O. Purification using semipreparative HPLC, with a C-18 column (Luna® 5μm C18(2) 100Å, 250 x 10 mm) used an isocratic method (60% MeCN with 0.1% Et<sub>3</sub>N in H<sub>2</sub>O (v/v) , 3.0 mL/min, rt: 25.8 min. Fraction was collected in 60 mL H<sub>2</sub>O and applied to a Sep-Pak C18 Plus and subsequently formulated by eluting with 1 mL EtOH into 9 mL sterile water for injection. Analytical HPLC for manual and automated synthesis according to the general procedure. UV detection at 254 nm, rt (radio): 8.34 min, TLC eluent: EtOAc + 0.1% Et<sub>3</sub>N (v/v), rf: 0.5. RCY: 24.6±2.7%, A<sub>m</sub>: 22.1 ± 8.96 GBq/μmol.

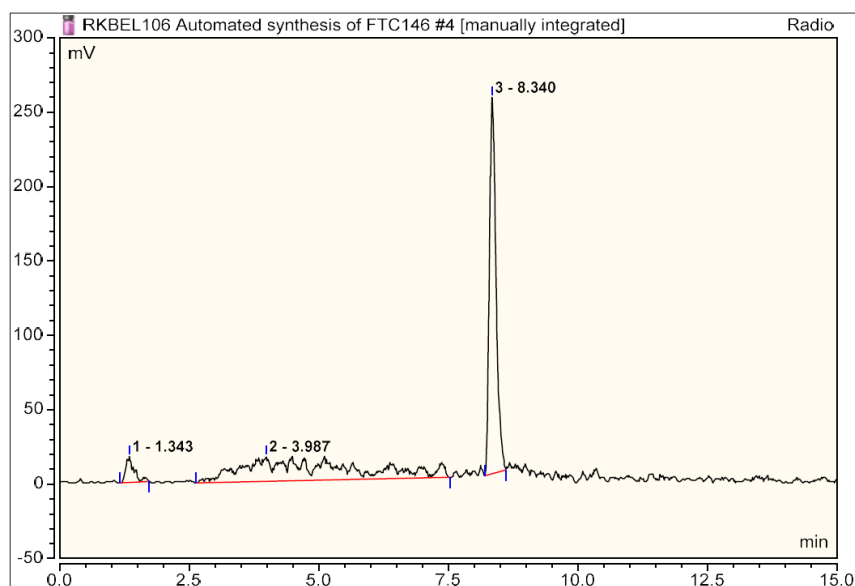**Figure S27.** Analytical HPLC chromatogram of crude product, rt: 8.34 min.



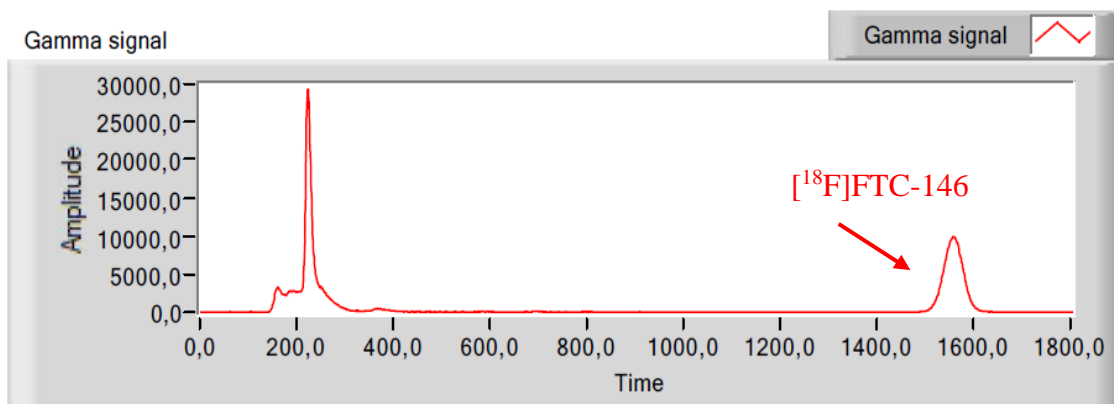

**Figure S28.** Preparative HPLC chromatogram of automated synthesis, rt: 25.8 min.

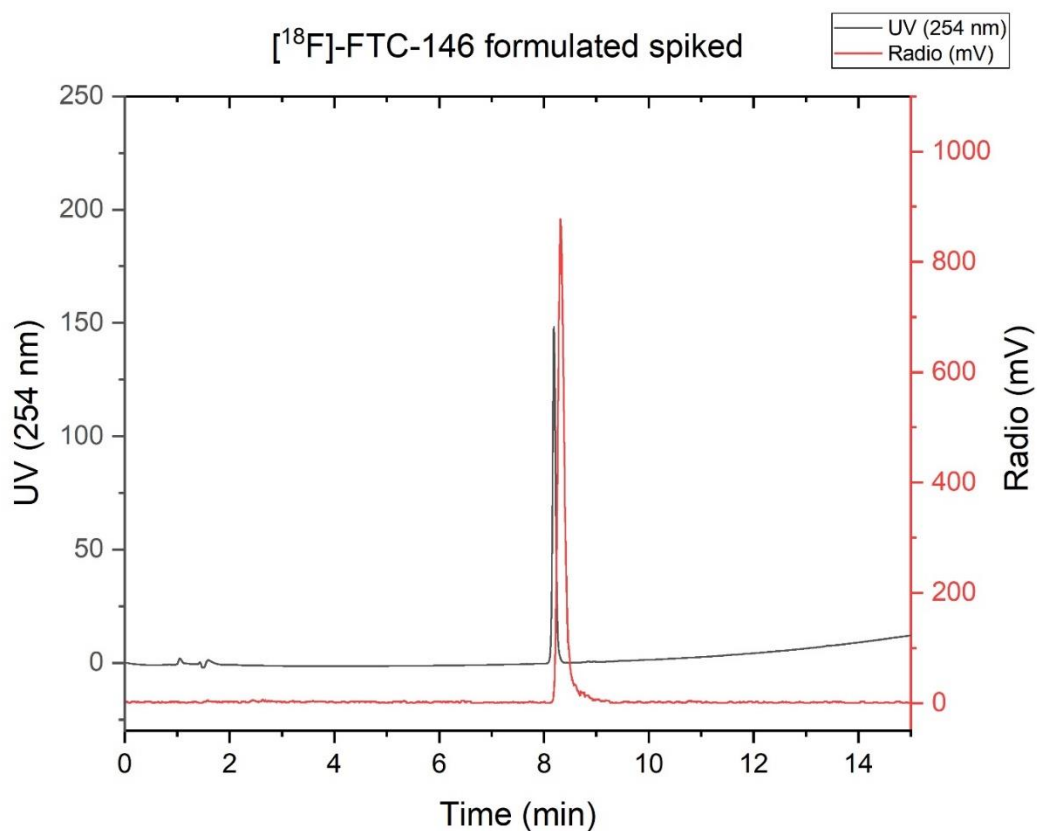

**Figure S29.** Analytical HPLC of formulated product  $[^{18}\text{F}]\text{FTC-146}$ , spiked with  $^{19}\text{F}$ -reference.

### $[^{18}\text{F}]\text{F-PEG}_3\text{-azide}$

The precursor and reference compound were obtained according to Steen et. al.<sup>12</sup> Manual radiosynthesis: The synthesis was performed according to the general procedure for manual labeling. Synthesis specific details:

**Table S14.** Details for [<sup>18</sup>F]F-PEG<sub>3</sub>-azide synthesis

| Original procedure (Shen et. al.) <sup>8</sup> |                                                                                                      |
|------------------------------------------------|------------------------------------------------------------------------------------------------------|
| Preconditioning of QMA                         | KHCO <sub>3</sub> (PS-30), no modification                                                           |
| Elution of QMA                                 | K <sub>2</sub> CO <sub>3</sub> (21.7 μmol) K <sub>222</sub> (40.0 μmol), MeCN/H <sub>2</sub> O 90:10 |
| Reaction solvent and precursor concentration   | DMSO (1 mL), 3.0 mg (8.0 μmol)                                                                       |
| Reaction time and temperature                  | 110 °C, 20 min                                                                                       |
| Derived conditions (3C)                        |                                                                                                      |
| Preconditioning of QMA                         | K <sub>2</sub> CO <sub>3</sub> (0.5M, 10 mL)                                                         |
| Elution of QMA                                 | Bu <sub>4</sub> NH <sub>2</sub> PO <sub>4</sub> (20 μmol), MeOH                                      |
| Reaction solvent and precursor concentration   | DMSO (1 mL), 0.85 mg (2.3 μmol)                                                                      |
| Reaction time and temperature                  | 120 °C, 5 min                                                                                        |

Automated synthesis: Synthesis was performed on a Scansys research module (Scansys Laboratorieteknik) reaction conditions from Manual radiosynthesis (3C) were used. Reaction was quenched with 2 mL H<sub>2</sub>O. Purification using semipreparative HPLC, with a C-18 column (Luna® 5μm C18(2) 100Å, 250 x 10 mm) used an isocratic method, 30% MeCN in 0.1% TFA (v/v), 3.0 mL/min, rt: 17.5 min. Fraction was collected in 60 mL H<sub>2</sub>O and applied to a Sep-Pak C18 Plus and subsequently formulated by eluting with 1 mL DMF. Analytical HPLC for manual and automated synthesis according to the general procedure. UV detection at 290 nm, rt (radio): 6.59 min, TLC eluent: EtOAc, rf: 0.8. RCY: 66.4±9.3%, A<sub>m</sub>: not determined.

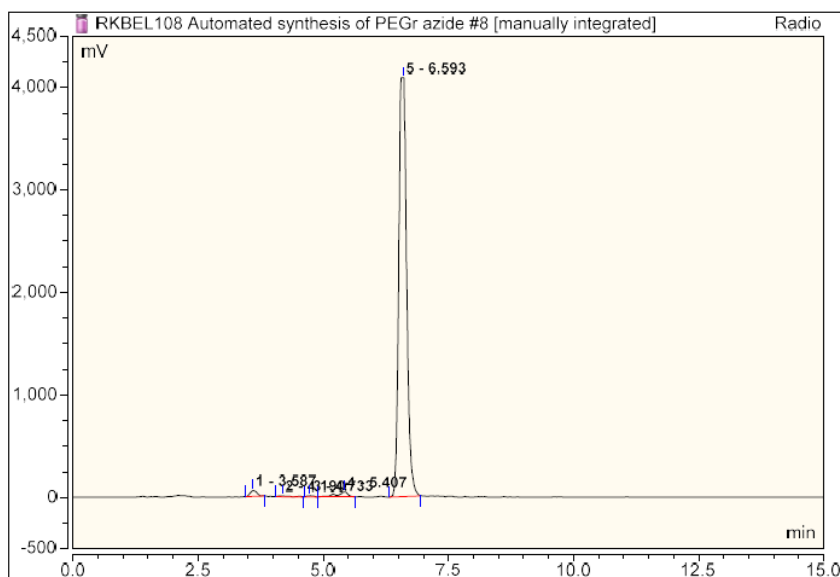**Figure S30.** Analytical HPLC chromatogram of crude product, rt: 6.59 min.

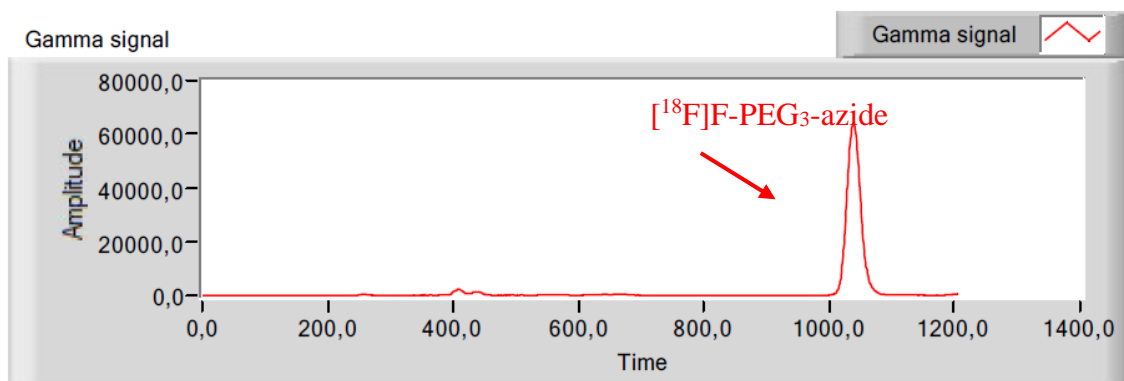

**Figure S31.** Preparative HPLC chromatogram of automated synthesis, rt: 17.5 min

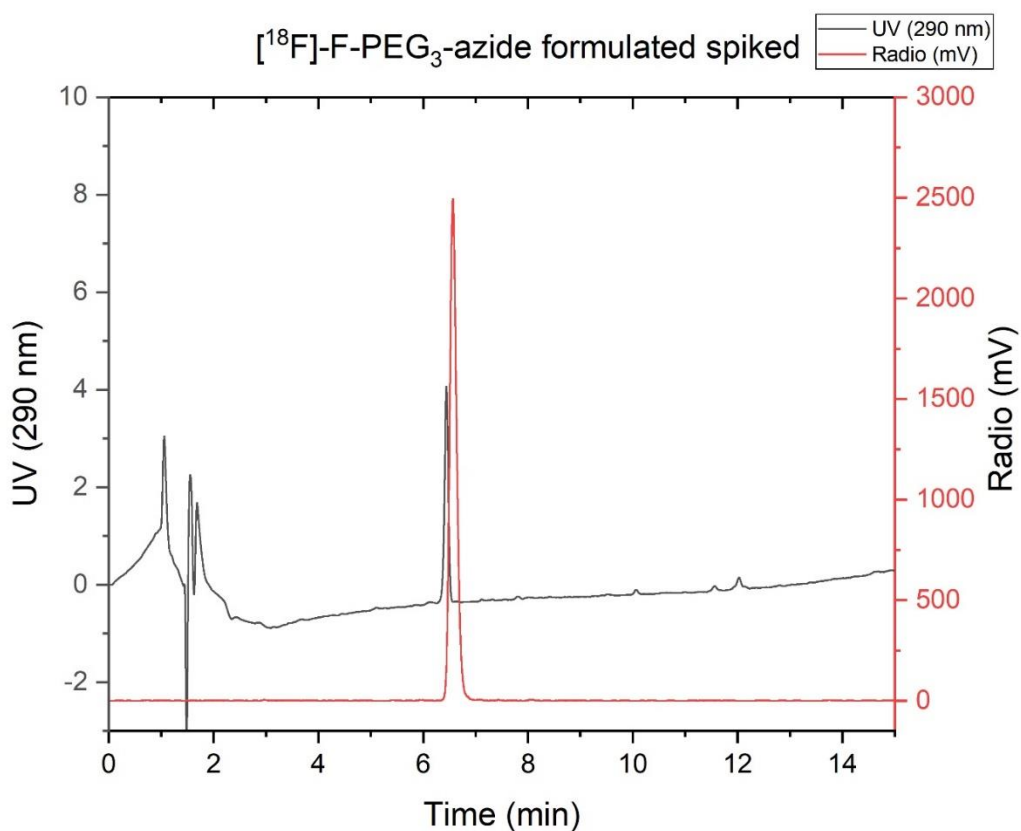

**Figure S32.** Analytical HPLC of formulated product [ $^{18}\text{F}$ ]F-PEG<sub>3</sub>-azide, spiked with  $^{19}\text{F}$ -reference.

**[ $^{18}\text{F}$ ](2R,3R,4S,5R,6R)-2-Azido-6-(fluoromethyl)tetrahydro-2H-pyran-3,4,5-triyl triacetate ([ $^{18}\text{F}$ ]sugarazide)**

The precursor, alkyne tetrazine and tetrazine reference compound were obtained according to Steen et. al.<sup>12</sup> Manual radiosynthesis: The synthesis was performed according to the general procedure for manual labeling. Synthesis specific details:

**Table S15.** Details for [<sup>18</sup>F]Sugarazide synthesis.

| Original procedure (Steen et al.) <sup>12</sup> |                                                                                                     |
|-------------------------------------------------|-----------------------------------------------------------------------------------------------------|
| Preconditioning of QMA                          | NaCl (no modification of Cl preconditioned QMA)                                                     |
| Elution of QMA                                  | K <sub>2</sub> CO <sub>3</sub> (36.2 μmol) K <sub>222</sub> (88.8 μmol), MeOH/H <sub>2</sub> O 96:4 |
| Reaction solvent and precursor concentration    | MeCN (0.5 mL), 11.0 mg (21.0 μmol)                                                                  |
| Reaction time and temperature                   | 100 °C, 7 min                                                                                       |
| Derived conditions (4B)                         |                                                                                                     |
| Preconditioning of QMA                          | K <sub>3</sub> PO <sub>4</sub> (0.5M, 10 mL)                                                        |
| Elution of QMA                                  | Bu <sub>4</sub> NOTf (20 μmol), MeCN/H <sub>2</sub> O, 50:50                                        |
| Reaction solvent and precursor concentration    | MeCN (1 mL), 3.2 mg (6.2 μmol)                                                                      |
| Reaction time and temperature                   | 100 °C, 5 min                                                                                       |

**Automated synthesis:** Synthesis was performed on a Scansys research module (Scansys Laboratorieteknik) reaction conditions from Manual radiosynthesis (4B) were used. Reaction was quenched with 2 mL H<sub>2</sub>O. Purification using semipreparative HPLC, with a C-18 column (Luna® 5μm C18(2) 100Å, 250 x 10 mm) used an isocratic method (40% MeCN in phosphate buffer 10 mM, pH 6, 3.0 mL/min, rt: 30 min. Fraction was collected in 60 mL H<sub>2</sub>O and applied to a Sep-Pak C18 Plus and subsequently eluted with 1 mL 7N NH<sub>3</sub> in MeOH for deprotection. Analytical HPLC for manual and automated synthesis according to the general procedure. Identification by copper catalyzed click of the deprotected tracer to an alkyne-tetrazine. UV detection at 254 nm, rt (radio): 8.98 min for the TLC eluent: EtOAc, rf: 0.9. RCY: 41.8±7.8%, A<sub>m</sub>: not determined for the [<sup>18</sup>F]sugarazide. Deprotected rt (radio): 2.35 min. Clicked to the alkyne-tetrazine rt (radio): 4.77 min.

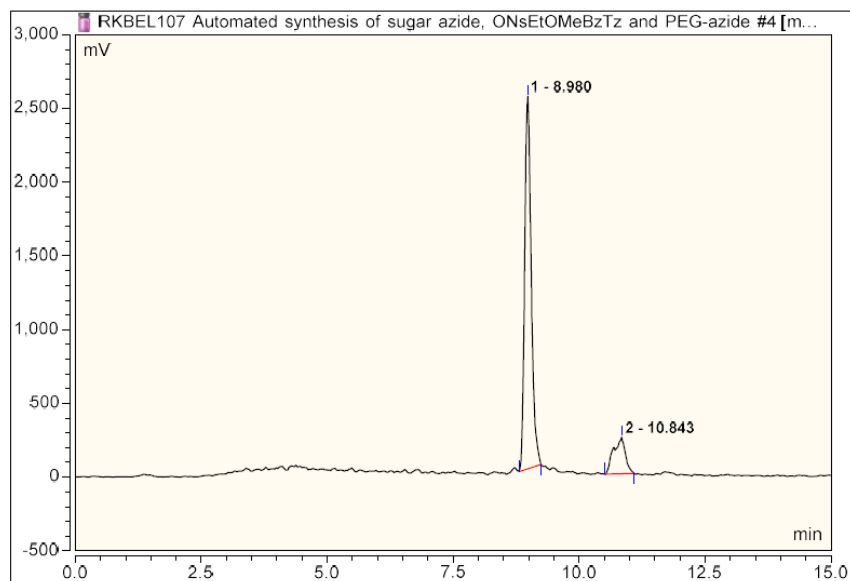**Figure S33.** Analytical HPLC chromatogram of crude product, rt: 8.98 min.

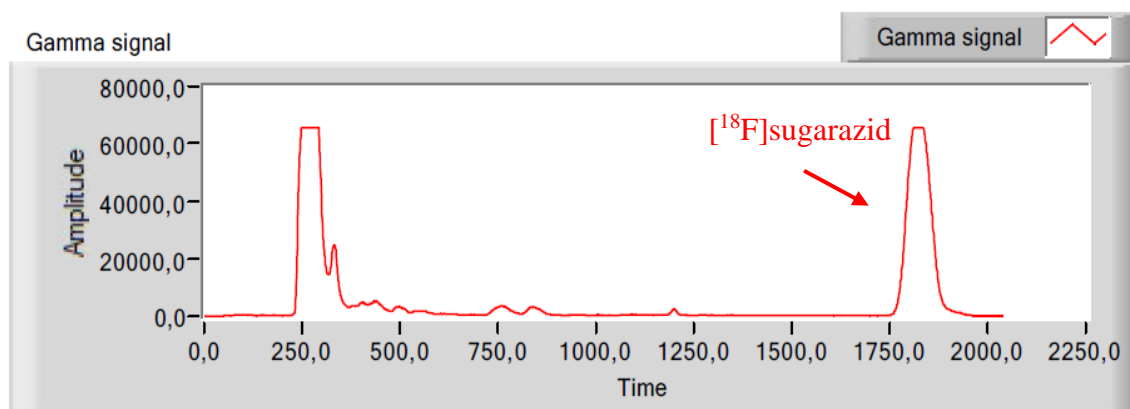

**Figure S34.** Preparative HPLC chromatogram of automated synthesis, rt: 30.0 min.

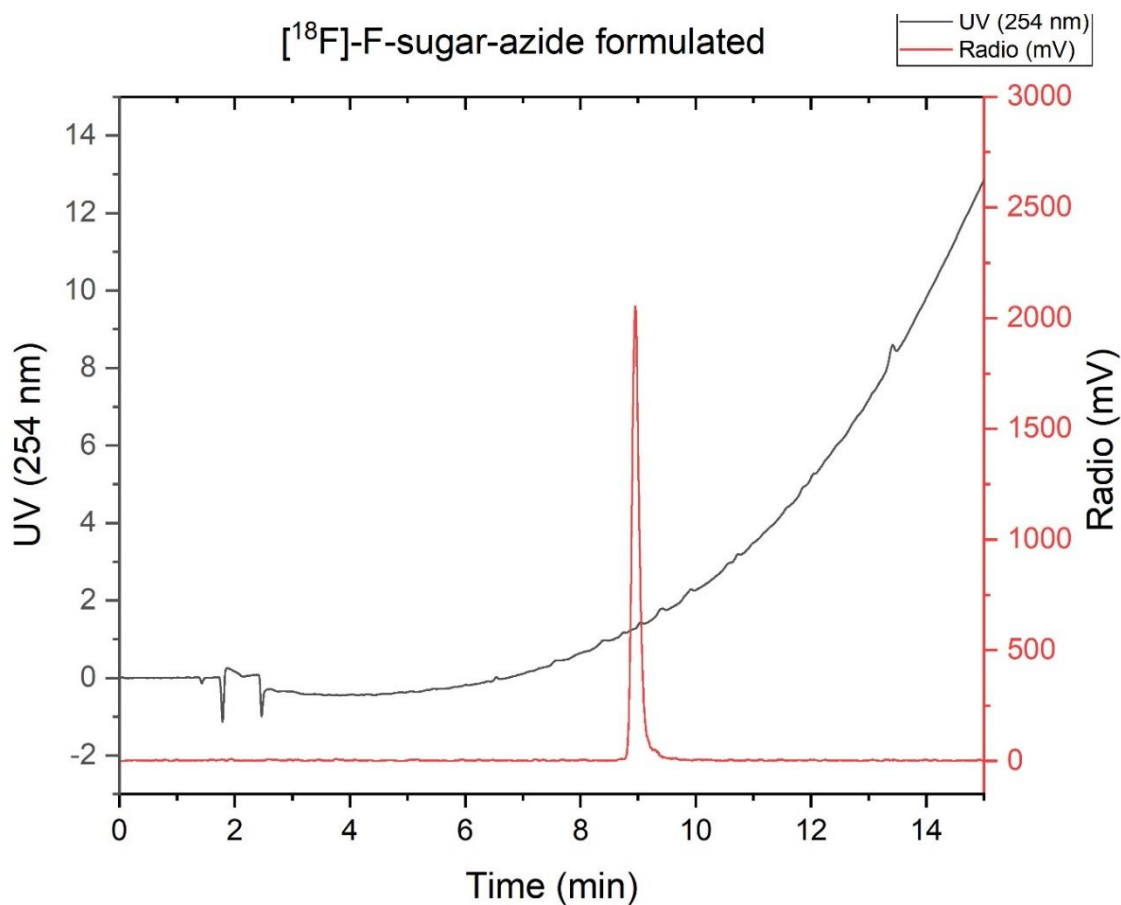

**Figure S35.** Analytical HPLC of formulated product [<sup>18</sup>F]sugarazide.

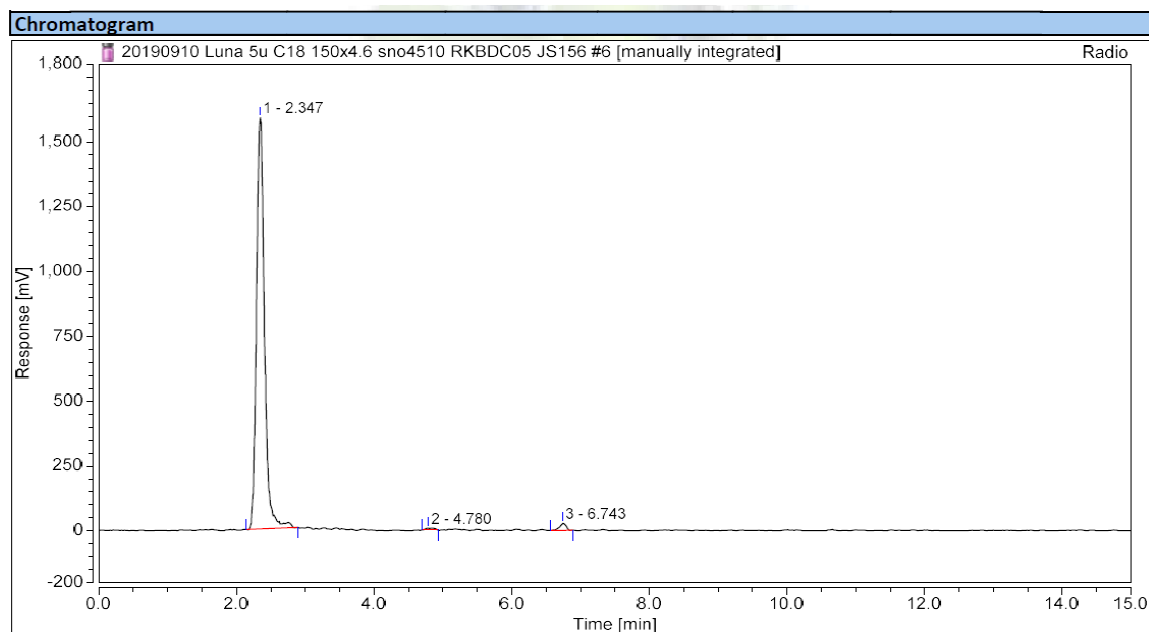

**Figure S36.** Chromatogram of the deprotected [ $^{18}\text{F}$ ]sugarazide, rt: 2.35 min.

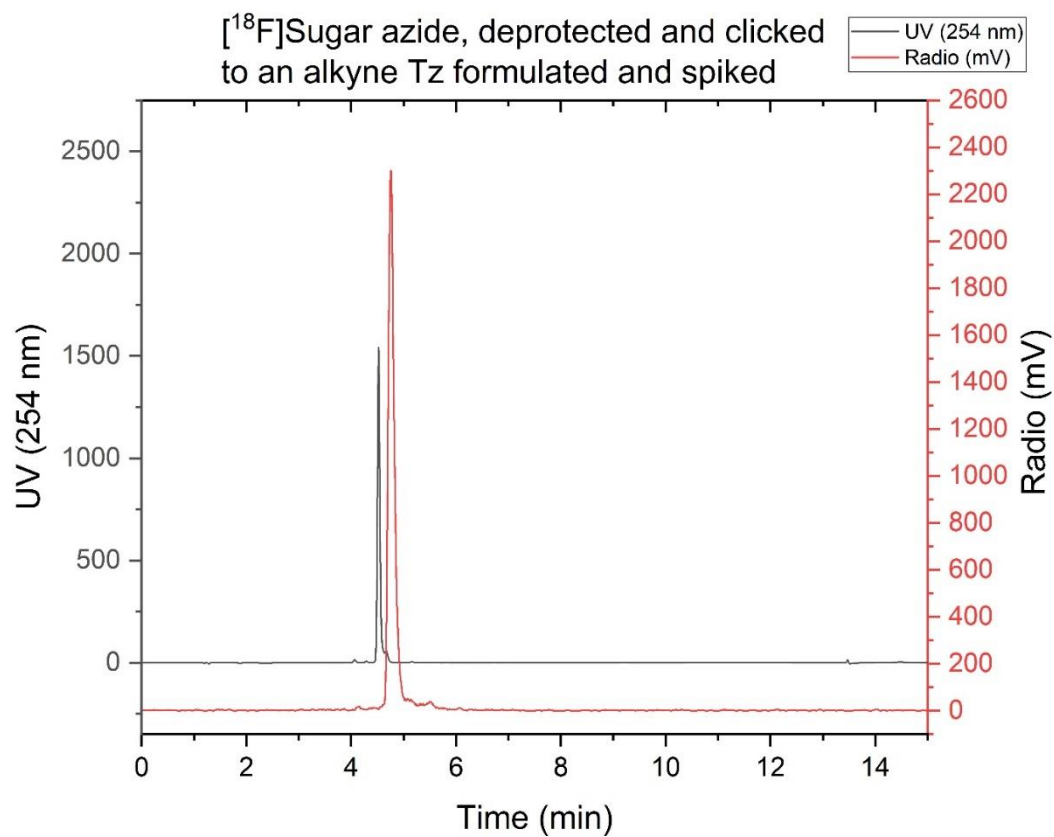

**Figure S37.** Analytical HPLC of formulated product [ $^{18}\text{F}$ ]sugarazide deprotected and clicked to an alkyne tetrazine according to the procedures described in Steen et. al.

## [<sup>18</sup>F]FE-TCO

The precursor (**18**) and reference compound (**19**) were synthesized according to *Scheme S5 Manual radiosynthesis*: The synthesis was performed according to the general procedure for manual labeling. Synthesis specific details:

**Table S16.** Details for [<sup>18</sup>F]FE-TCO synthesis

| Original procedure (Collins et. al.) <sup>3</sup> |                                                                                    |
|---------------------------------------------------|------------------------------------------------------------------------------------|
| Preconditioning of QMA                            | K <sub>2</sub> CO <sub>3</sub> (0.5 M, 10 mL)                                      |
| Elution of QMA                                    | 6.5 μL of 40% Bu <sub>4</sub> NOH (10.0 μmol) MeCN/H <sub>2</sub> O 30:50 (0.8 mL) |
| Reaction solvent and precursor concentration      | MeCN (1 mL), 4.0 mg (12.3 μmol)                                                    |
| Reaction time and temperature                     | 90 °C, 10 min                                                                      |
| Derived conditions (3C)                           |                                                                                    |
| Preconditioning of QMA                            | K <sub>2</sub> CO <sub>3</sub> (0.5M, 10 mL)                                       |
| Elution of QMA                                    | Bu <sub>4</sub> NH <sub>2</sub> PO <sub>4</sub> (20 μmol), MeOH                    |
| Reaction solvent and precursor concentration      | MeCN (1 mL), 1.00 mg (3.1 μmol)                                                    |
| Reaction time and temperature                     | 120° C, 5 min                                                                      |

Automated synthesis: Synthesis was performed on a Scansys research module (Scansys Laboratorieteknik) reaction conditions from Manual radiosynthesis (3C) were used. Reaction was quenched with 2 mL H<sub>2</sub>O. Purification using semipreparative HPLC, with a C-18 column (Luna® 5μm C18(2) 100Å, 250 x 10 mm) used an isocratic method, 50% MeCN in 0.1% TFA (v/v), 6.0 mL/min, rt: 13.0 min. Fraction was collected in 60 mL H<sub>2</sub>O and applied to a Sep-Pak C18 Plus and subsequently formulated by eluting with 1 mL EtOH and diluted in 9 mL H<sub>2</sub>O. Analytical HPLC for manual and automated synthesis according to the general procedure. UV detection at 220 nm, rt (radio): 10.68 min, TLC eluent: Hep/EtOAc (30:70), rf: 0.6. RCY: 61.8±4.7%, A<sub>m</sub>: 70.7 ± 27.9 GBq/μmol.

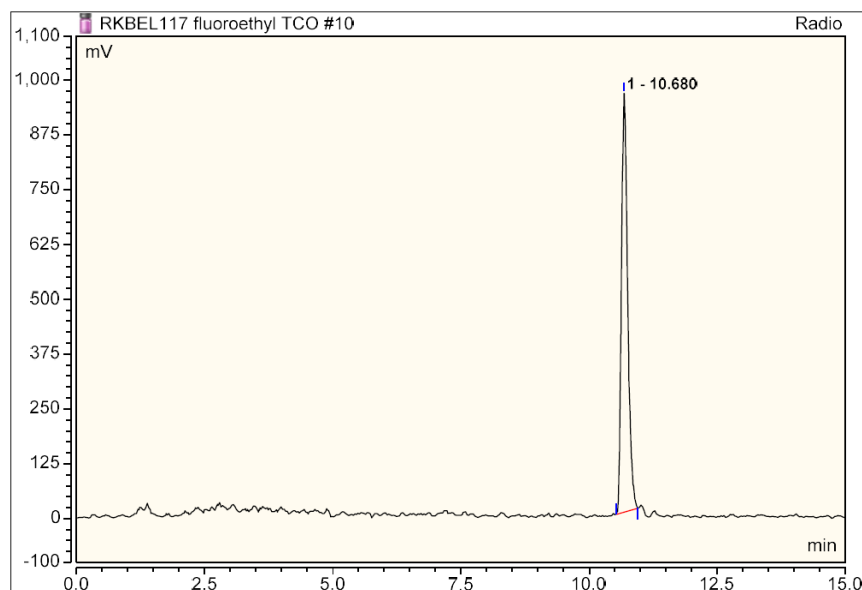

**Figure S38.** Analytical HPLC chromatogram of crude product, rt: 10.68 min.

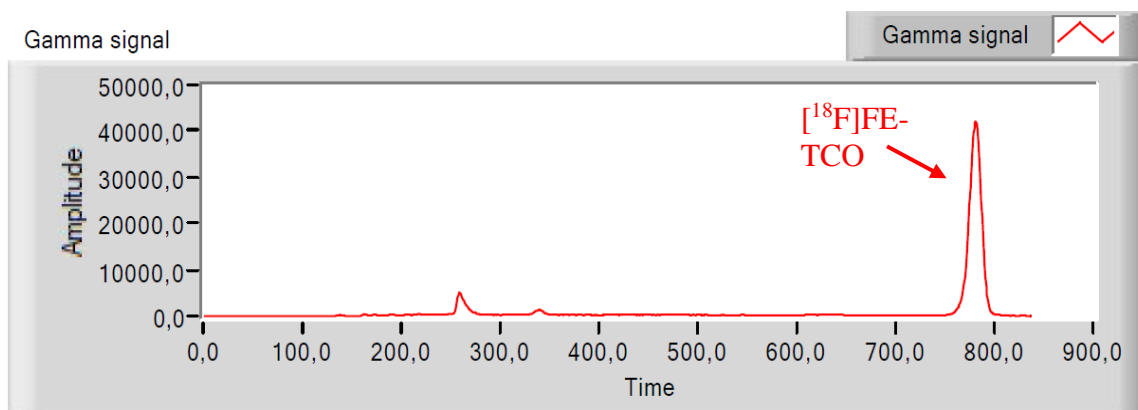

**Figure S39.** Preparative HPLC chromatogram of automated synthesis, rt: 13.00 min.

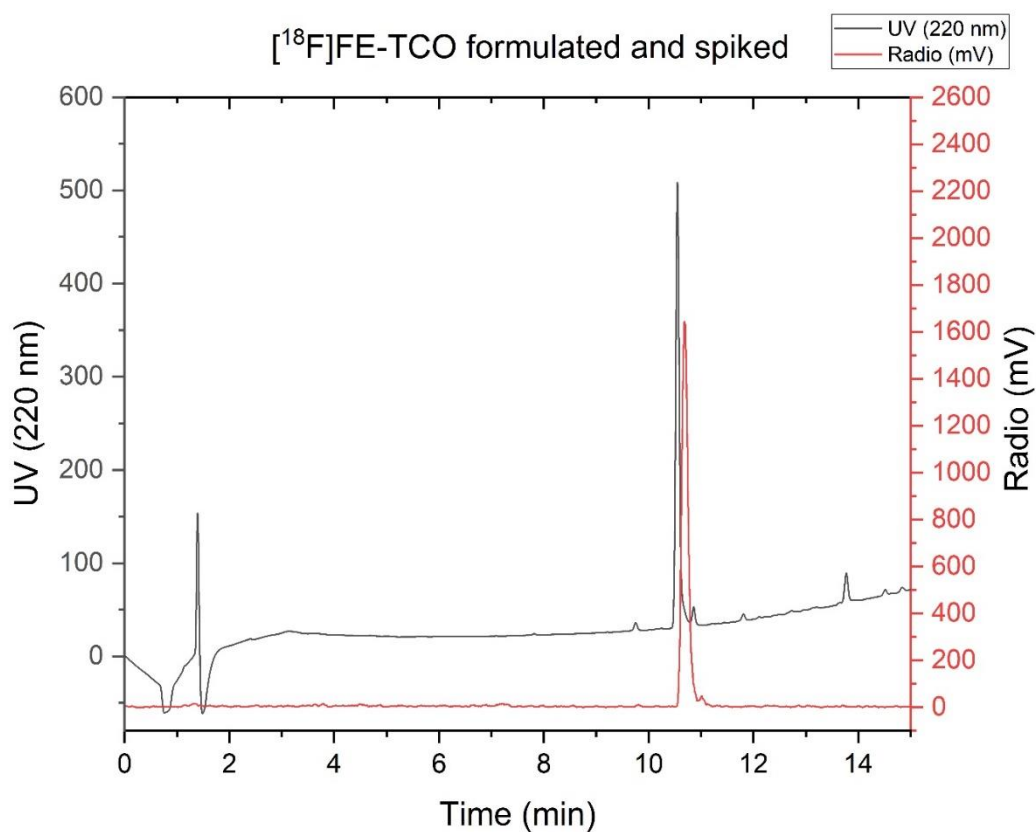

**Figure S40.** Analytical HPLC of formulated product  $[^{18}\text{F}]\text{FE-TCO}$ , spiked with  $^{19}\text{F}$ -reference.

### $[^{18}\text{F}]\text{FTHA}$

The precursor and reference compound were purchased from ABX (Radeberg, Germany). Manual radiosynthesis: The synthesis was performed according to the general procedure for manual labeling. However, following the reaction the solvent was removed by adding a ventilation needle to the vial and the reaction was heated at 130 °C for 5 min under a stream of nitrogen. Deprotection by adding 1 mL of



2N NaOH, reaction was left at 130 °C for 5 min. No separate analysis was made for crude and resolubilized fractions. Synthesis specific details:

**Table S17.** Details for [<sup>18</sup>F]FTHA synthesis.

| Original procedure (Savisto et. al.) <sup>9</sup> |                                                                                                         |
|---------------------------------------------------|---------------------------------------------------------------------------------------------------------|
| Preconditioning of QMA                            | K <sub>2</sub> CO <sub>3</sub> (0.5 M, 10 mL)                                                           |
| Elution of QMA                                    | K <sub>2</sub> CO <sub>3</sub> (32.0 μmol) K <sub>222</sub> (10.0 μmol),<br>MeCN/H <sub>2</sub> O 10:90 |
| Reaction solvent and precursor concentration      | MeCN (1 mL), 14.0 mg (8.7 μmol)                                                                         |
| Reaction time and temperature                     | 130 °C, 5 min                                                                                           |
| Derived conditions (4A)                           |                                                                                                         |
| Preconditioning of QMA                            | K <sub>3</sub> PO <sub>4</sub> (0.5M, 10 mL)                                                            |
| Elution of QMA                                    | Bu <sub>4</sub> NOMs (20 μmol), MeOH                                                                    |
| Reaction solvent and precursor concentration      | MeCN (1 mL), 2.4 mg (3.1 μmol)                                                                          |
| Reaction time and temperature                     | 120 °C, 5 min                                                                                           |

Automated synthesis: Synthesis was performed on a Scansys research module (Scansys Laboratorieteknik) reaction conditions from Manual radiosynthesis (4B) were used with deprotection as described for Manual radiosynthesis. Reaction was quenched with 300 μL MeOH, 300 μL H<sub>2</sub>O and 166 μL AcOH. Purification using semipreparative HPLC, with a C-18 column (Luna® 5μm C18(2) 100Å, 250 x 10 mm) used an isocratic method MeOH/H<sub>2</sub>O/AcOH, 85:15:4 (v/v/v), 3.0 mL/min, rt: 19.1 min. Fraction was collected in 60 mL H<sub>2</sub>O and applied to a Sep-Pak C18 and subsequently formulated by eluting with 1 mL EtOH into 9 mL sterile water for injection. Analytical HPLC for manual and automated synthesis according to the general procedure. UV detection at 230 nm, rt (radio): 13.30 min, TLC eluent: n-heptane/EtOAc, (66:33) rf: 0.4. RCY: 26.5±4.8%, A<sub>m</sub>: not determined.

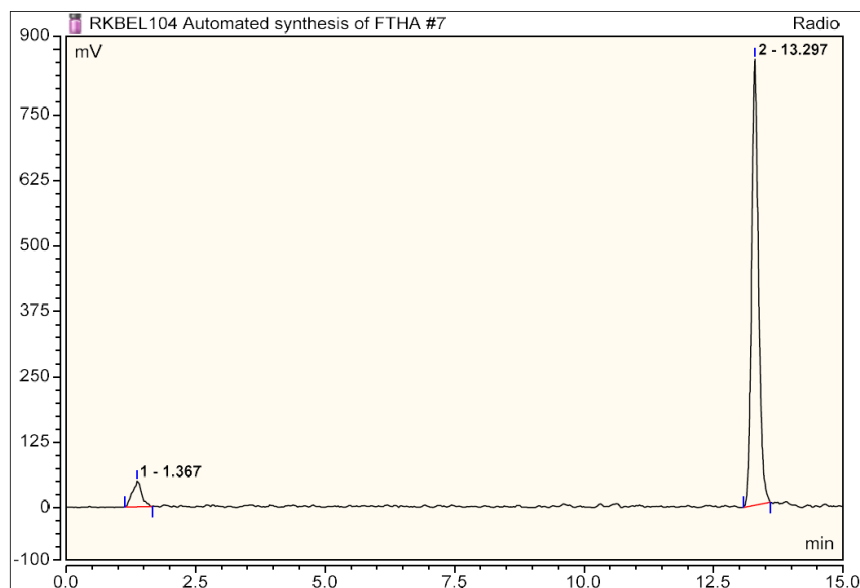

**Figure S41.** Analytical HPLC chromatogram of crude product after deprotection, rt: 13.30 min.

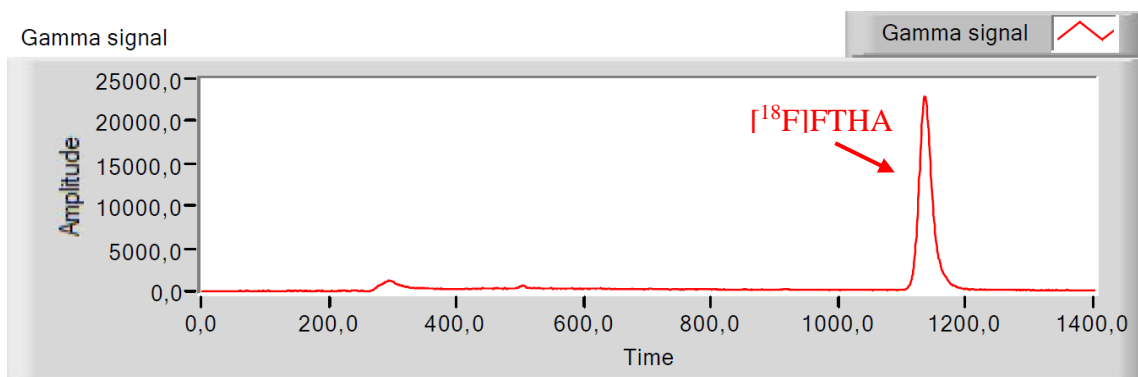

**Figure S42.** Preparative HPLC chromatogram of automated synthesis, rt: 19.1 min.

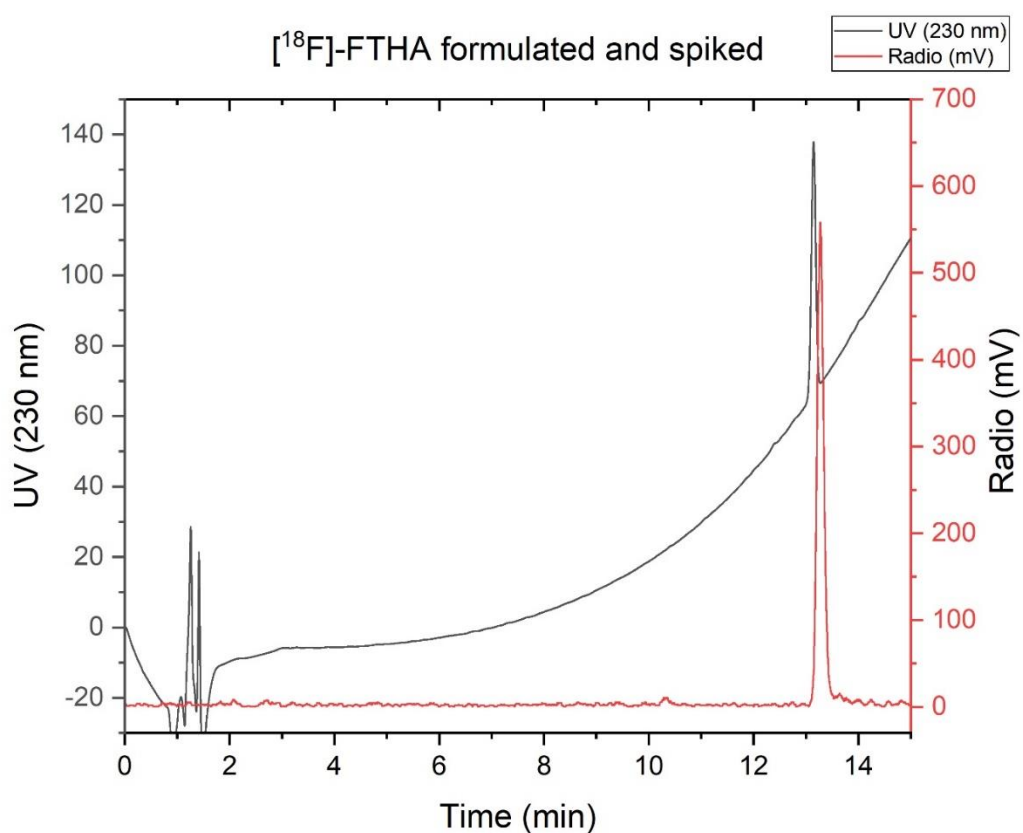

**Figure S43.** Analytical HPLC of formulated product [ $^{18}\text{F}$ ]FTHA, spiked with  $^{19}\text{F}$ -reference.

**[ $^{18}\text{F}$ ]4-[(2-Fluoroethoxy)methyl]-1,2,4,5-tetrazin-3-yl]benzene ([ $^{18}\text{F}$ ]23)**

The precursor (**26**) and reference compound (**23**) were synthesized according to *Scheme S6. Manual radiosynthesis*. The synthesis was performed according to the general procedure for manual labeling. Synthesis specific details:

**Table S18.** Details for [<sup>18</sup>F]23 synthesis

| Original procedure (Li et. al.) <sup>10</sup> |                                                                                                              |
|-----------------------------------------------|--------------------------------------------------------------------------------------------------------------|
| Preconditioning of QMA                        | K <sub>2</sub> CO <sub>3</sub> (0.5M, 10 mL)                                                                 |
| Elution of QMA                                | Et <sub>4</sub> NHCO <sub>3</sub> (20 μmol) MeCN/H <sub>2</sub> O 50:50 (concentration not specified in ref) |
| Reaction solvent and precursor concentration  | MeCN (1 mL), 3.0 mg (7.2 μmol) (concentration and volume not specified in ref)                               |
| Reaction time and temperature                 | 85 °C, 15 min                                                                                                |
| Derived conditions (4A)                       |                                                                                                              |
| Preconditioning of QMA                        | K <sub>3</sub> PO <sub>4</sub> (0.5M, 10 mL)                                                                 |
| Elution of QMA                                | Bu <sub>4</sub> NOMs (20 μmol), MeOH                                                                         |
| Reaction solvent and precursor concentration  | tBuOH/MeCN or tBuOH/DMSO, 86:14 (1 mL), 1.3 mg (3.1 μmol)                                                    |
| Reaction time and temperature                 | 100 °C, 5 min                                                                                                |

Automated synthesis: Synthesis was performed on a Scansys research module (Scansys Laboratorieteknik) reaction conditions from Manual radiosynthesis (4A) were used. Reaction was quenched with 2 mL 0.1% TFA in H<sub>2</sub>O. Purification using semipreparative HPLC, with a C-18 column (Luna® 5μm C18(2) 100Å, 250 x 10 mm) used an isocratic method (45% MeCN with 0.1% TFA in H<sub>2</sub>O (v/v) , 3.0 mL/min, rt: 16.5 min. Fraction was collected in 60 mL H<sub>2</sub>O and applied to a Sep-Pak C18 Plus and subsequently formulated by eluting with 1 mL EtOH into 9 mL sterile water for injection. Analytical HPLC for manual and automated synthesis according to the general procedure. UV detection at 254 nm, rt: 9.00 min, TLC eluent: n-heptane/EtOAc, 66:34, rf: 0.6. RCY: 22.8±3.9%, A<sub>m</sub>: 34.1 ± 14.0 GBq/μmol.

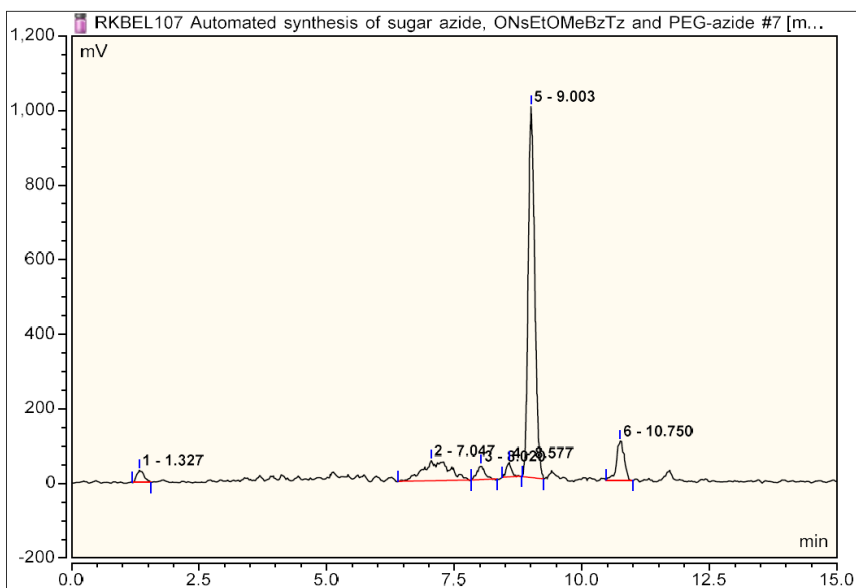**Figure S44.** Analytical HPLC chromatogram of crude product, rt: 9.00 min

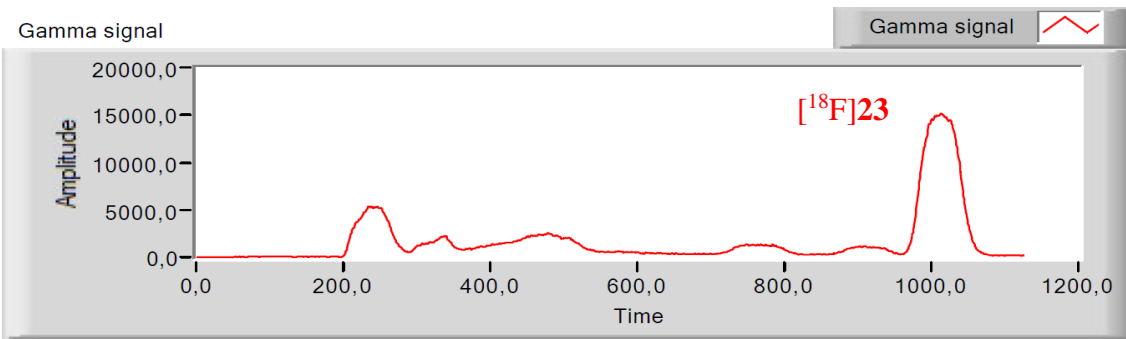

**Figure S45.** Preparative HPLC chromatogram of automated synthesis, rt: 16.5 min.

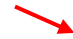

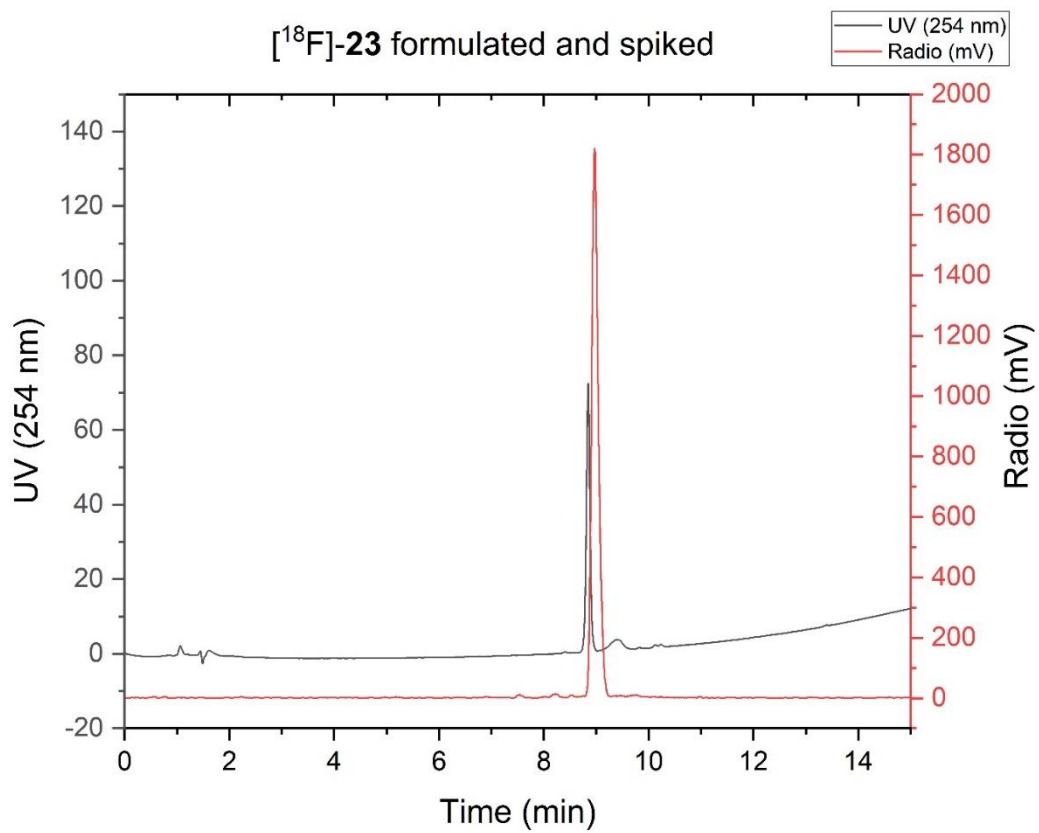

**Figure S46.** Analytical HPLC of formulated product [<sup>18</sup>F]23, spiked with <sup>19</sup>F-reference.

### [<sup>18</sup>F]2-Fluoro-4-(1,2,4,5-tetrazin-3-yl)-2-fluoroethyl-benzoate (29)

The precursor (31) and reference compound (29) were synthesized according to *Scheme S7*. Manual radiosynthesis: The synthesis was performed according to the general procedure for manual labeling. Synthesis specific details:

**Table S19.** Details for [<sup>18</sup>F]29 synthesis.

| Original procedure (not existing)            |                                              |
|----------------------------------------------|----------------------------------------------|
| Preconditioning of QMA                       | -                                            |
| Elution of QMA                               | -                                            |
| Reaction solvent and precursor concentration | -                                            |
| Reaction time and temperature                | -                                            |
| Derived conditions (4A)                      |                                              |
| Preconditioning of QMA                       | K <sub>3</sub> PO <sub>4</sub> (0.5M, 10 mL) |
| Elution of QMA                               | Bu <sub>4</sub> NOMs (20 μmol), MeOH         |
| Reaction solvent and precursor concentration | tBuOH/DMSO, 86:14 (1 mL), 1.4 mg (3.1 μmol)  |
| Reaction time and temperature                | 100 °C, 5 min                                |

Automated synthesis: Synthesis was performed on a Scansys research module (Scansys Laboratorieteknik) reaction conditions from Manual radiosynthesis (4A) were used. Reaction was quenched with 2 mL 0.1% TFA in H<sub>2</sub>O. Purification using semipreparative HPLC, with a C-18 column (Luna® 5μm C18(2) 100Å, 250 x 10 mm) used an isocratic method (45% MeCN with 0.1% TFA in H<sub>2</sub>O (v/v), 3.0 mL/min, rt: 18.5 min. Fraction was collected in 60 mL H<sub>2</sub>O and applied to a Sep-Pak C18 Plus and subsequently formulated by eluting with 1 mL EtOH into 9 mL sterile water for injection. Analytical HPLC for manual and automated synthesis according to the general procedure. UV detection at 254 nm, rt (radio): 9.25 min, TLC eluent: n-heptane/EtOAc, 50:50, rf: 0.5. RCY: 5.2±2.8%, A<sub>m</sub>: 96.3 ± 5.8 MBq/μmol.

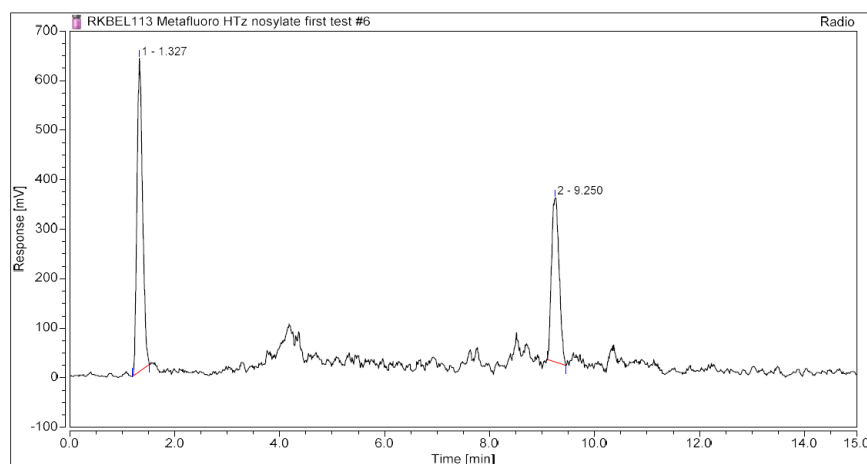

**Figure S47.** Analytical HPLC chromatogram of crude product, rt: 9.25 min

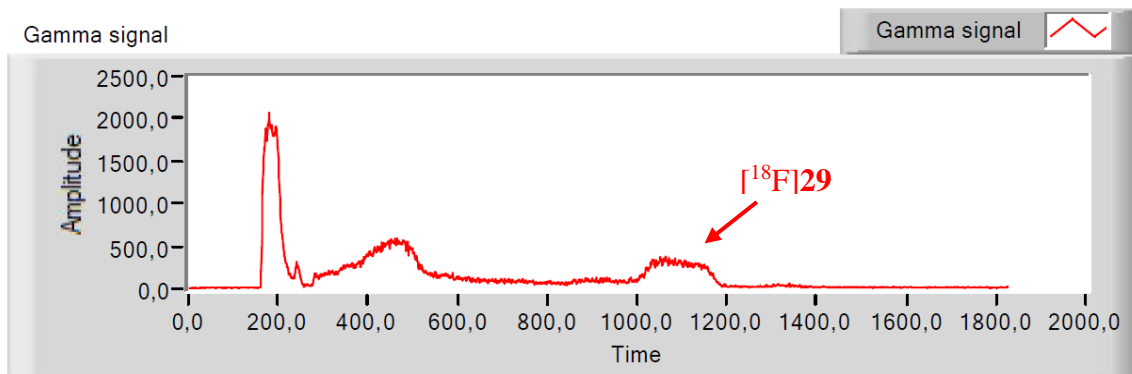

**Figure S48.** Preparative HPLC chromatogram of automated synthesis, rt: 18.5 min.

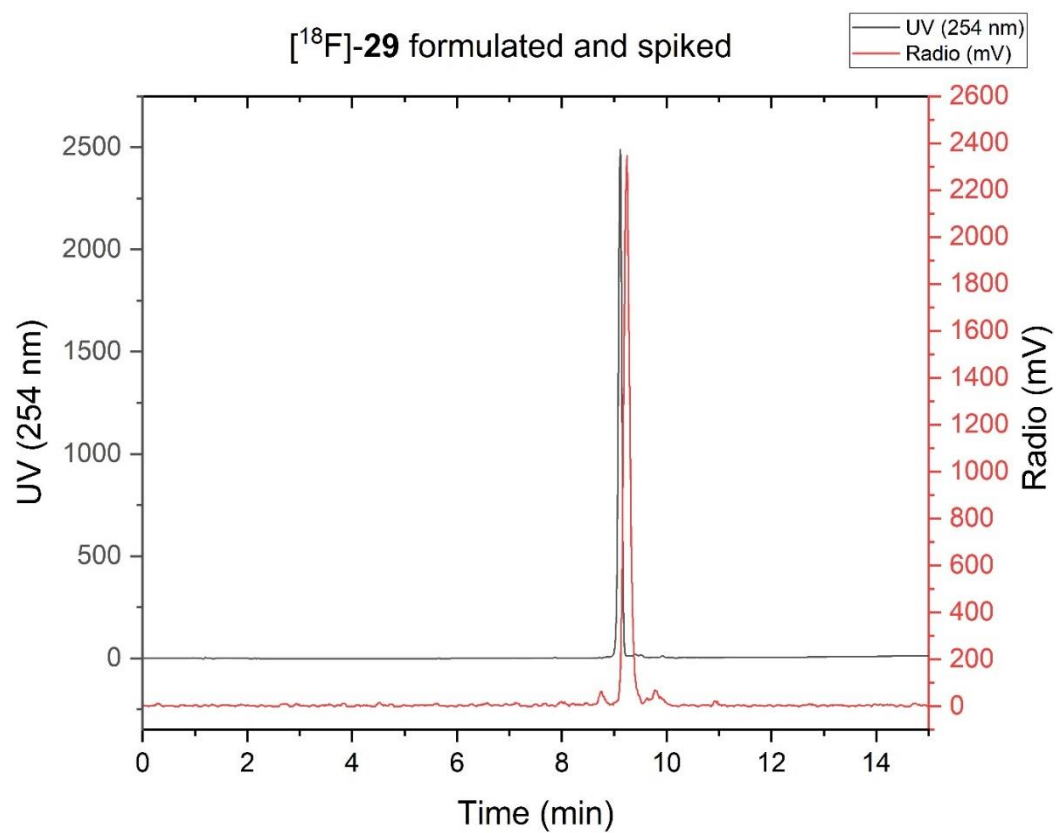

**Figure S49.** Analytical HPLC of formulated product [<sup>18</sup>F]29, spiked with <sup>19</sup>F-reference.

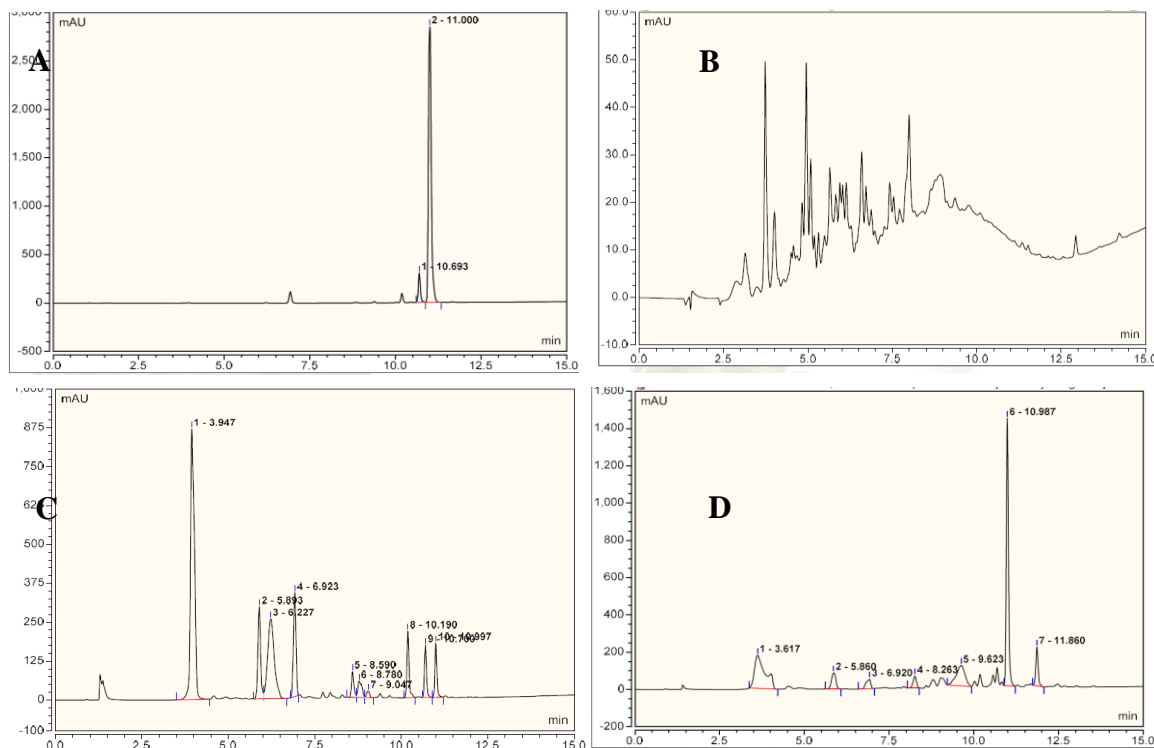

**Figure S50.** UV-trace of analytical HPLC to compare how different reaction conditions influence the amount of remaining precursor **9**. A) Precursor **24** as reference, rt: 11.00 min. B) Conditions from Li et. al. C) Conditions **4A** with DMSO and D) Conditions **4A** with tBuOH/MeCN as solvent.

## Leaving group screening for tetrazine labeling

The manual tetrazine labeling optimization to obtain the pRCY was performed according to the general procedure for manual radiolabeling reactions. For the labeling of [ $^{18}\text{F}$ ]**23** we used the OM's precursor (**24**), OT's precursor (**25**) and the ON's precursor (**26**). For the labeling of [ $^{18}\text{F}$ ]**29** we used the OT's precursor (**31**) and the ON's precursor (**32**). All reactions were carried out at 100 °C, the results are presented in *Table S20*.

**Table S20** Results from manual radiolabeling reactions to obtain the  $^{18}\text{F}$ -radiolabelled tetrazines [ $^{18}\text{F}$ ]**23** and [ $^{18}\text{F}$ ]**29**.

| Target product                | Precursor | Preconditioning    | Elution                             | Solvent    | pRCY                   |
|-------------------------------|-----------|--------------------|-------------------------------------|------------|------------------------|
| [ $^{18}\text{F}$ ] <b>23</b> | <b>24</b> | $\text{PO}_4^{3-}$ | $\text{Bu}_4\text{NOMs}$            | tBuOH/MeCN | 1.8%                   |
| [ $^{18}\text{F}$ ] <b>23</b> | <b>25</b> | $\text{PO}_4^{3-}$ | $\text{Bu}_4\text{NOMs}$            | tBuOH/MeCN | 4.5%                   |
| [ $^{18}\text{F}$ ] <b>23</b> | <b>26</b> | $\text{PO}_4^{3-}$ | $\text{Bu}_4\text{NOMs}$            | tBuOH/MeCN | 25.8±3.8% <sup>a</sup> |
| [ $^{18}\text{F}$ ] <b>23</b> | <b>26</b> | $\text{PO}_4^{3-}$ | $\text{Bu}_4\text{NOMs}$            | tBuOH/DMSO | 23.6%                  |
| [ $^{18}\text{F}$ ] <b>23</b> | <b>26</b> | $\text{CO}_3^{2-}$ | $\text{Bu}_4\text{NOMs}$            | tBuOH/MeCN | 0%                     |
| [ $^{18}\text{F}$ ] <b>23</b> | <b>26</b> | $\text{PO}_4^{3-}$ | $\text{Et}_4\text{NHCO}_3$          | tBuOH/MeCN | 0%                     |
| [ $^{18}\text{F}$ ] <b>23</b> | <b>26</b> | $\text{CO}_3^{2-}$ | $\text{Bu}_4\text{NH}_2\text{PO}_4$ | tBuOH/MeCN | 0%                     |
| [ $^{18}\text{F}$ ] <b>23</b> | <b>26</b> | $\text{CO}_3^{2-}$ | $\text{Et}_4\text{NHCO}_3$          | MeCN       | 0% <sup>b</sup>        |
| [ $^{18}\text{F}$ ] <b>29</b> | <b>31</b> | $\text{PO}_4^{3-}$ | $\text{Bu}_4\text{NOMs}$            | tBuOH/DMSO | 4.6%                   |
| [ $^{18}\text{F}$ ] <b>29</b> | <b>32</b> | $\text{PO}_4^{3-}$ | $\text{Bu}_4\text{NOMs}$            | tBuOH/DMSO | 11.5±3.5% <sup>a</sup> |
| [ $^{18}\text{F}$ ] <b>29</b> | <b>32</b> | $\text{CO}_3^{2-}$ | $\text{Et}_4\text{NHCO}_3$          | MeCN       | 0% <sup>b</sup>        |

<sup>a</sup>Reaction performed in triplicates, <sup>b</sup> Conditions from Li et al. Reaction time: 15 min, reaction temperature: 85°C, precursor amount: 9  $\mu\text{mol}$ .



## Click kinetics of synthesized Tz references towards TCOs

Reaction kinetics of the synthesized tetrazines **23** and **29** were determined by pseudo-first order measurements in MeCN at  $25.0 \pm 0.1^\circ\text{C}$  in a SX20 stopped flow photometer (Applied Photophysics).<sup>11</sup> The pseudo first order rate constant was determined by linearization of the decay curve followed by linear fitting. The second order rate constant was calculated from the pseudo-first order rate constant, results are presented in *Table S21*.

**Table S21.** Measured click kinetics of tetrazine reference compounds towards TCO by stop flow measurements.

| Compound                     | Measured $k_2$ ( $\text{M}^{-1}\text{s}^{-1}$ ) in MeCN $25^\circ\text{C}$ |
|------------------------------|----------------------------------------------------------------------------|
| [ <sup>19</sup> F] <b>23</b> | 682                                                                        |
| [ <sup>19</sup> F] <b>29</b> | 2676                                                                       |

## NMR spectra

The <sup>1</sup>H, <sup>13</sup>C and <sup>19</sup>F (when relevant) NMRs of the synthesized compounds can be found below.

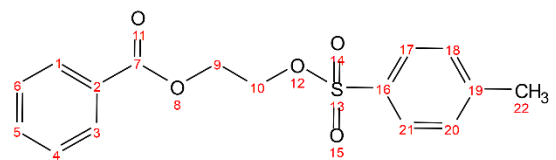

(2)

$^1\text{H NMR CDCl}_3$

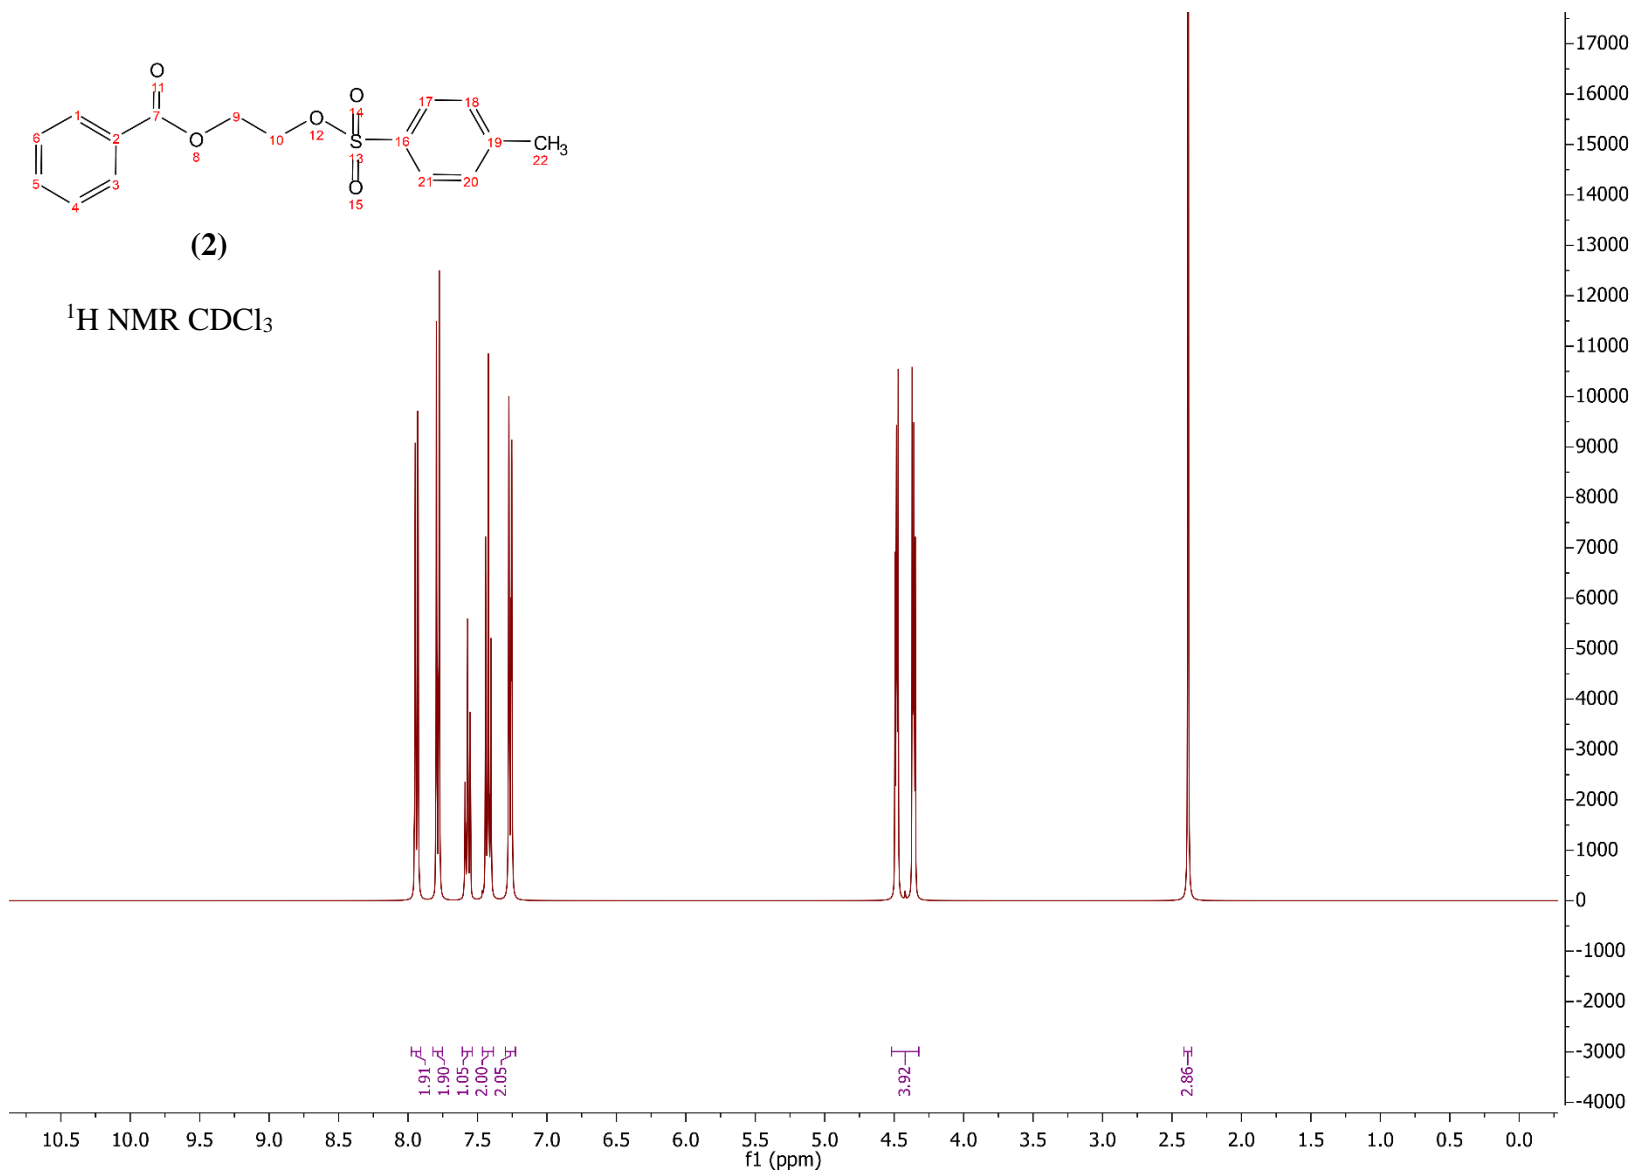

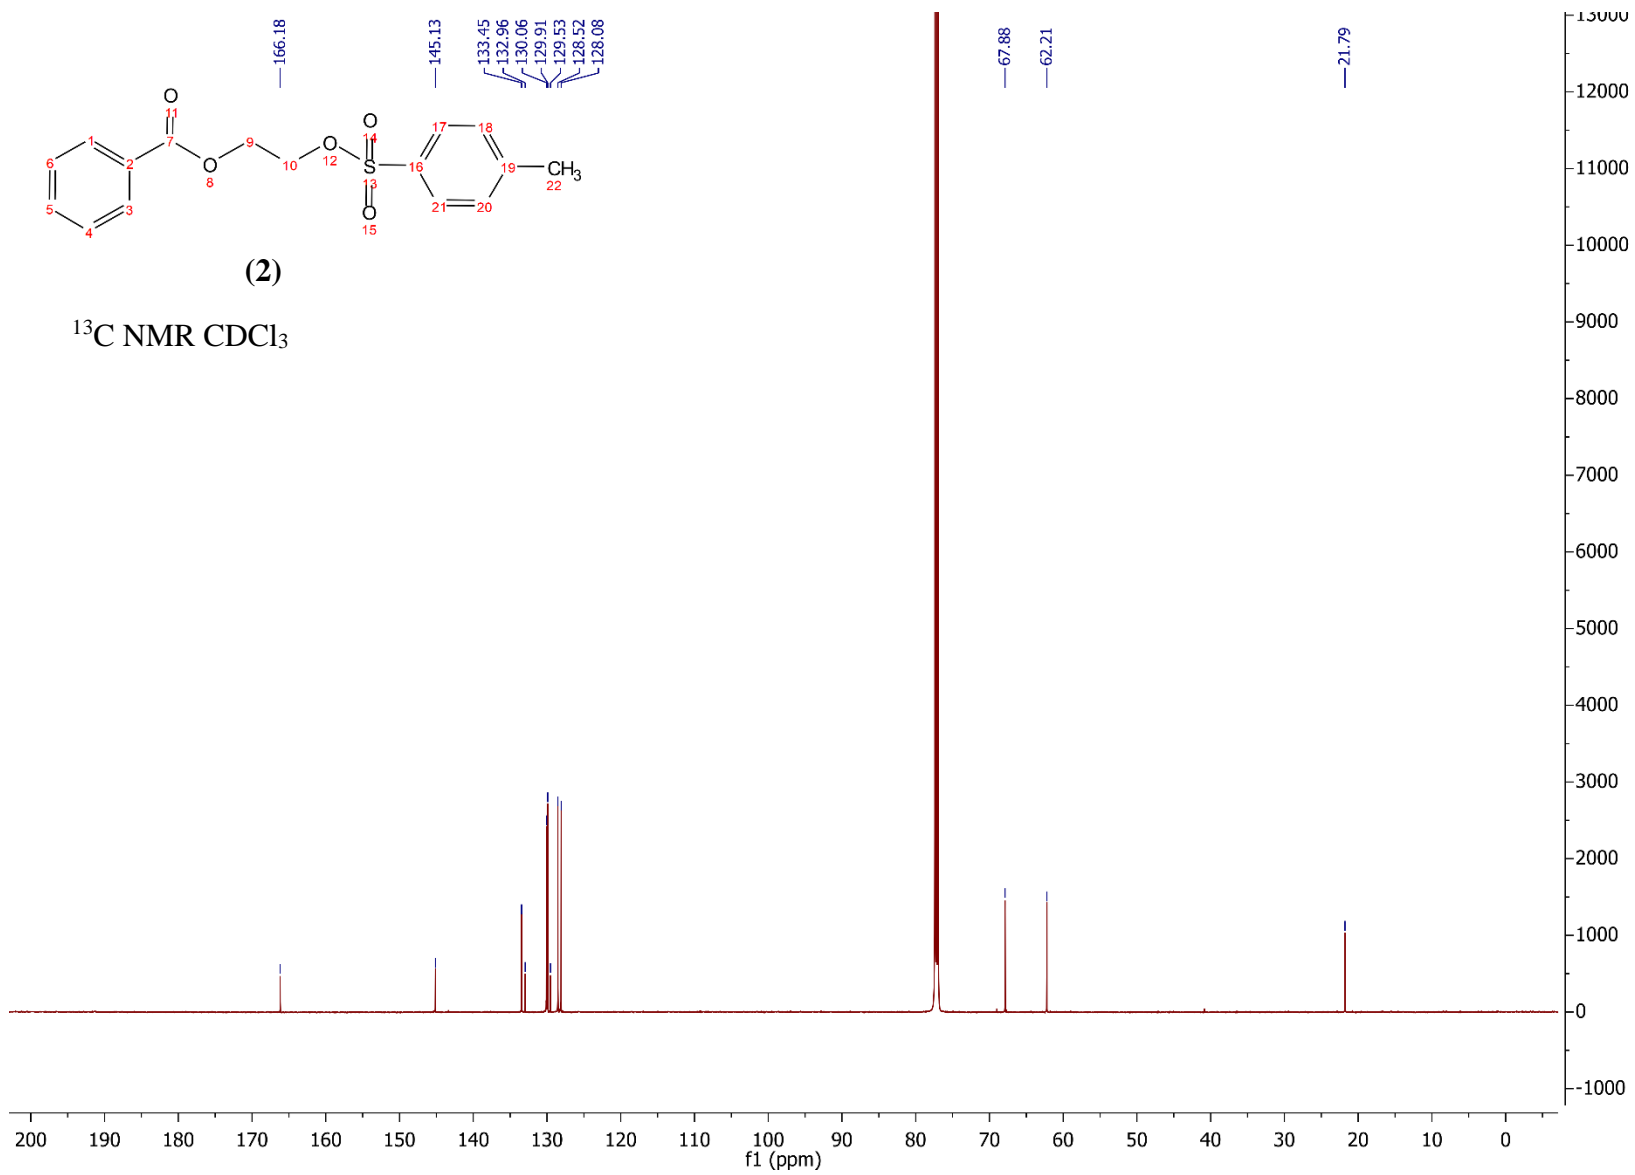

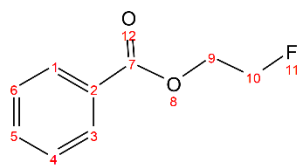

(3)

<sup>1</sup>H NMR CDCl<sub>3</sub>

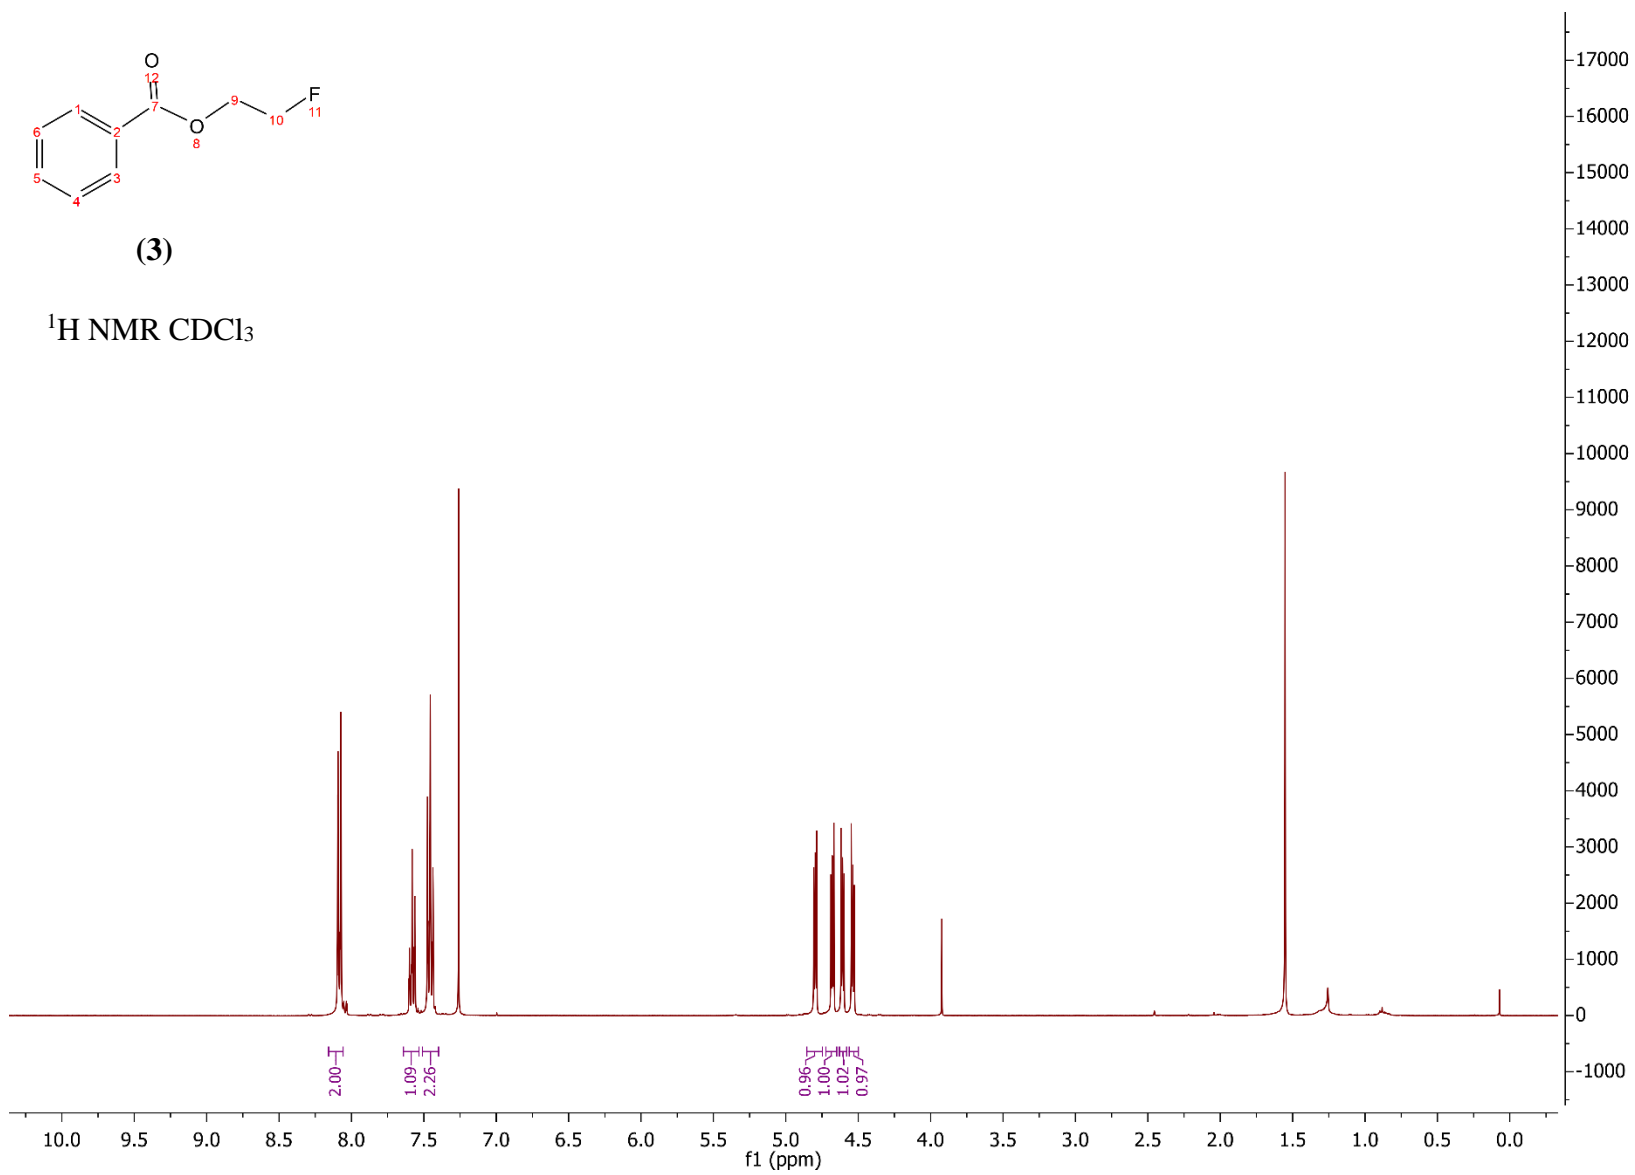

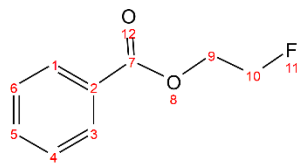

(3)

$^{13}\text{C}$  NMR  $\text{CDCl}_3$

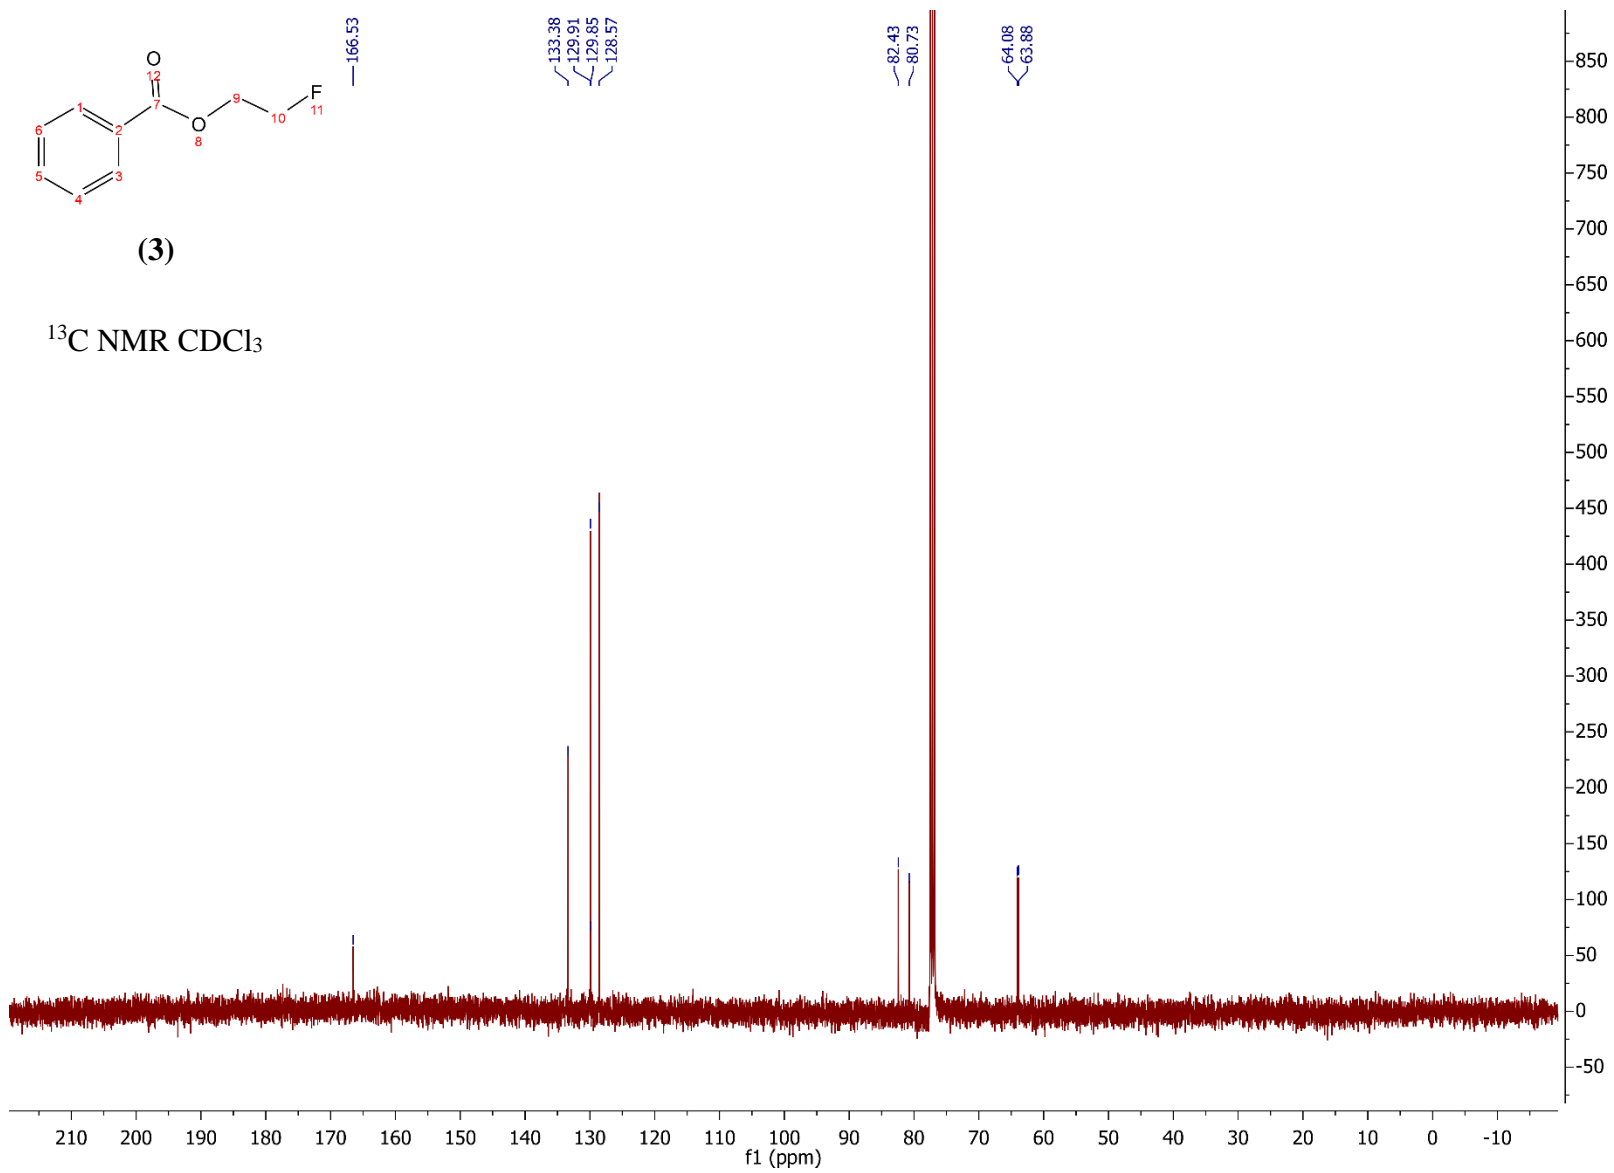

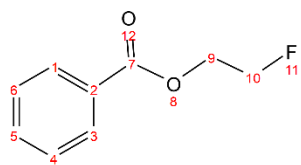

(3)

$^{19}\text{F}$  NMR  $\text{CDCl}_3$

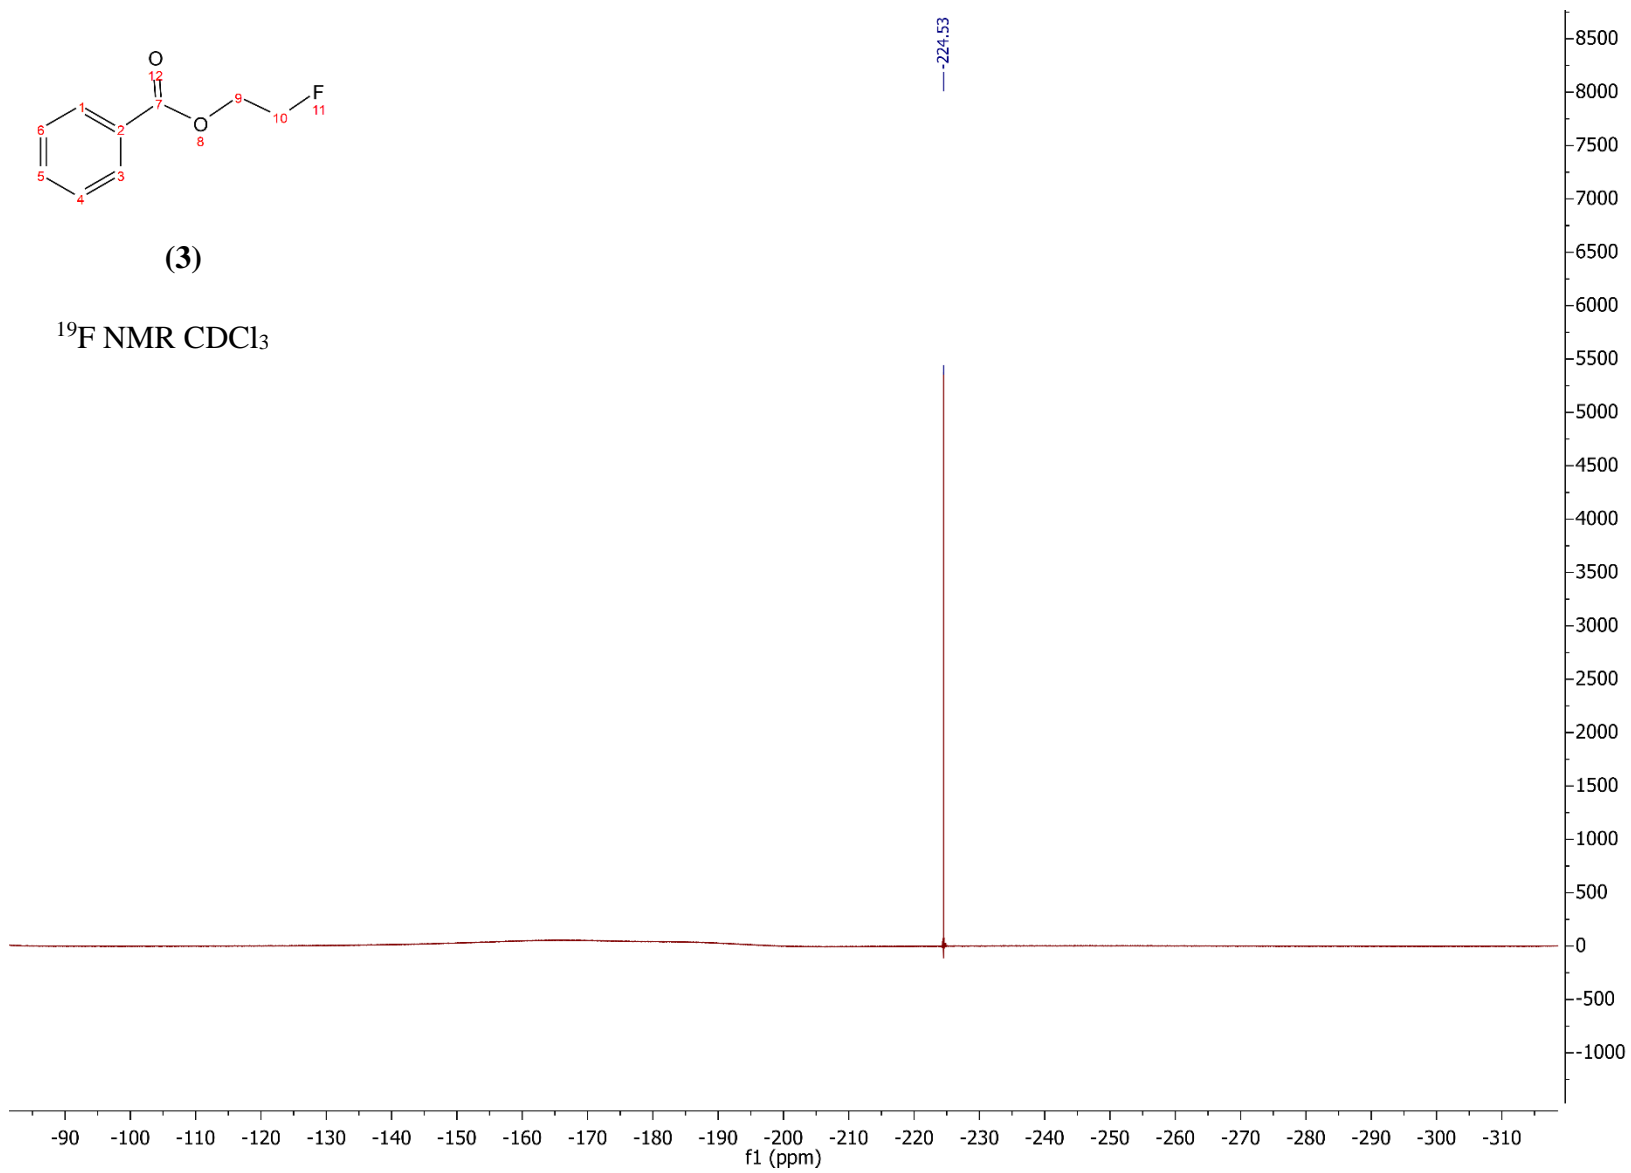

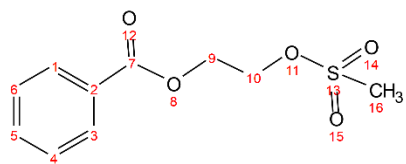

(5)

$^1\text{H NMR CDCl}_3$

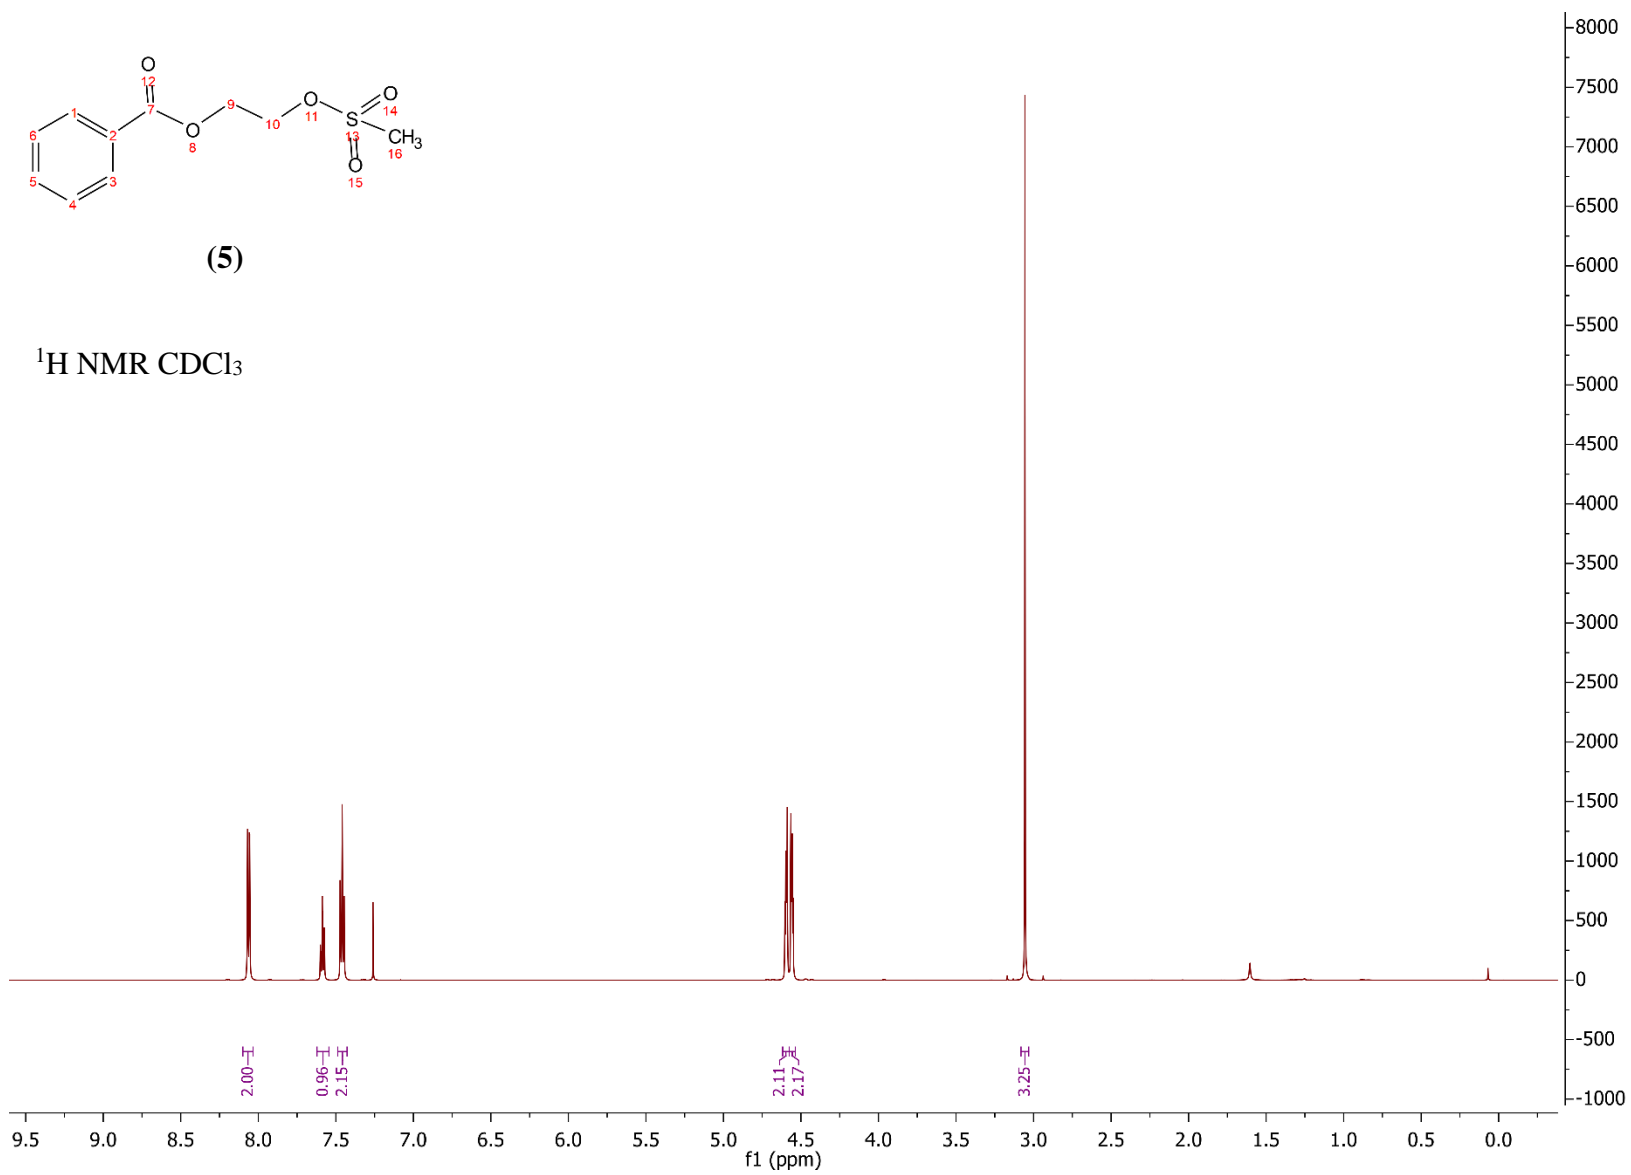

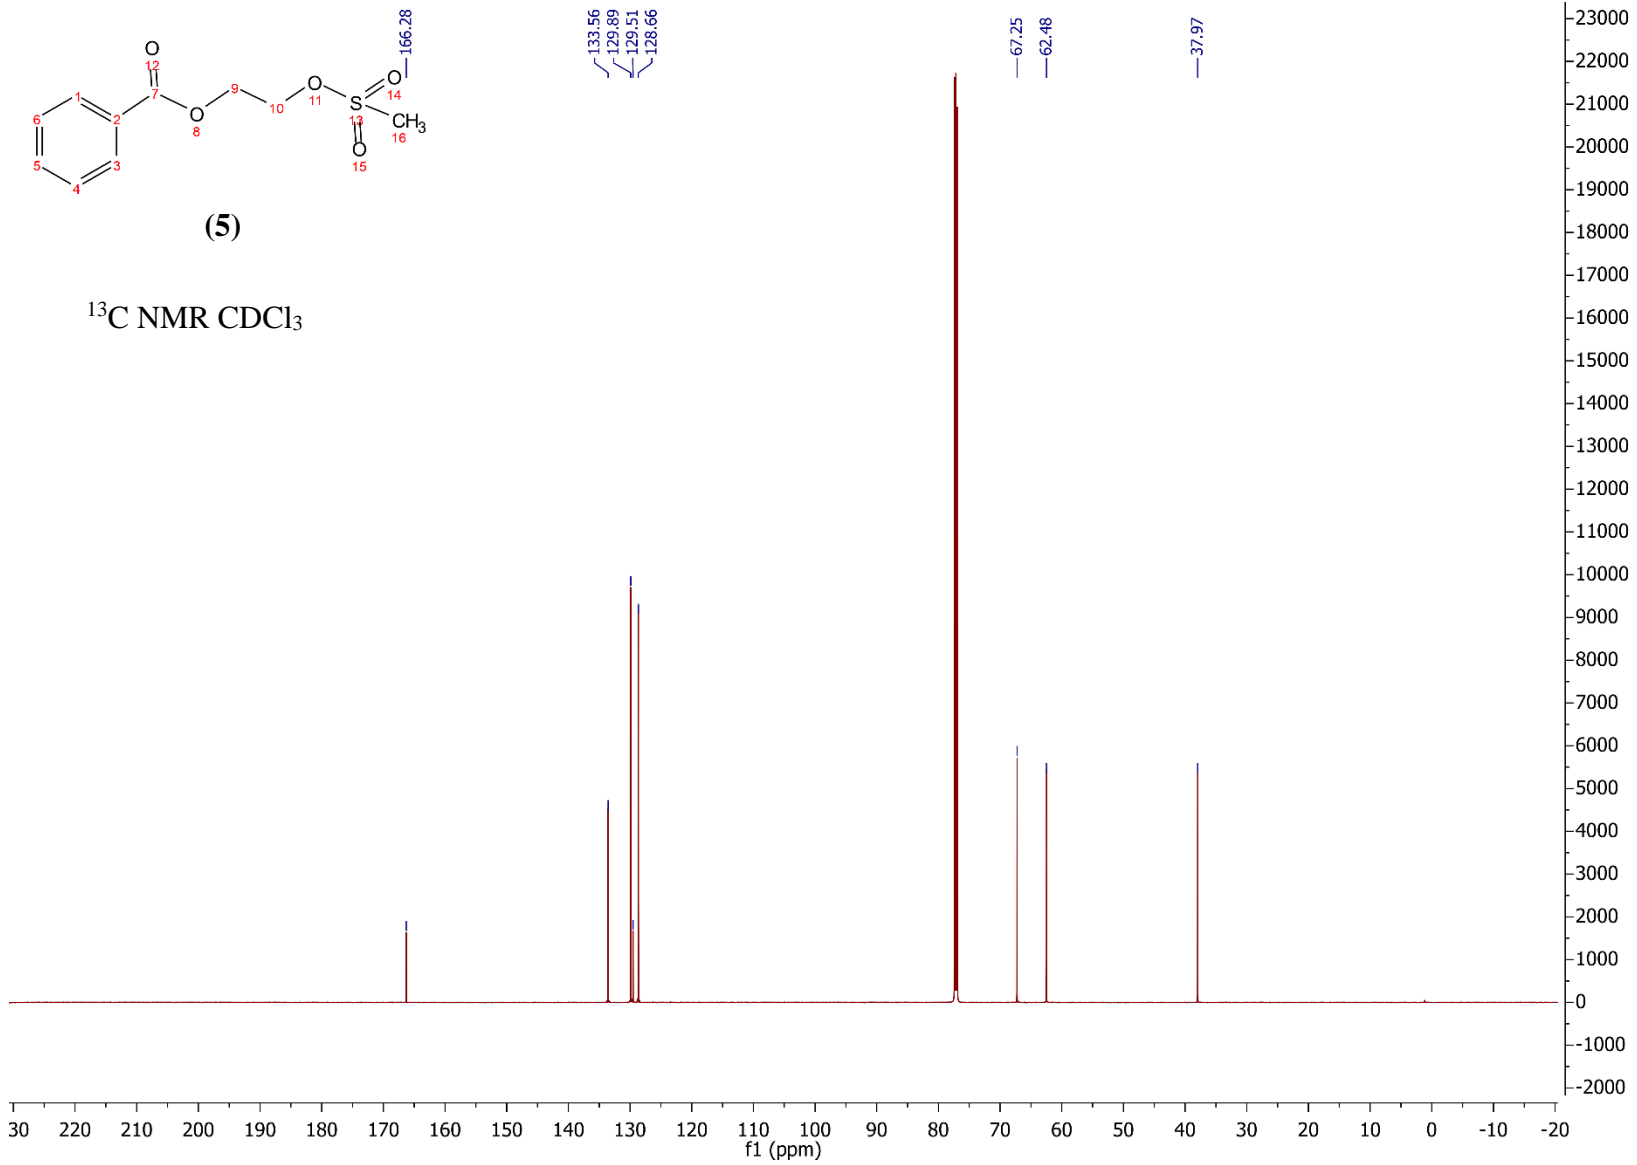



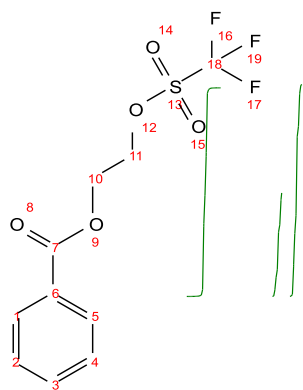

(6)

$^1\text{H NMR CDCl}_3$

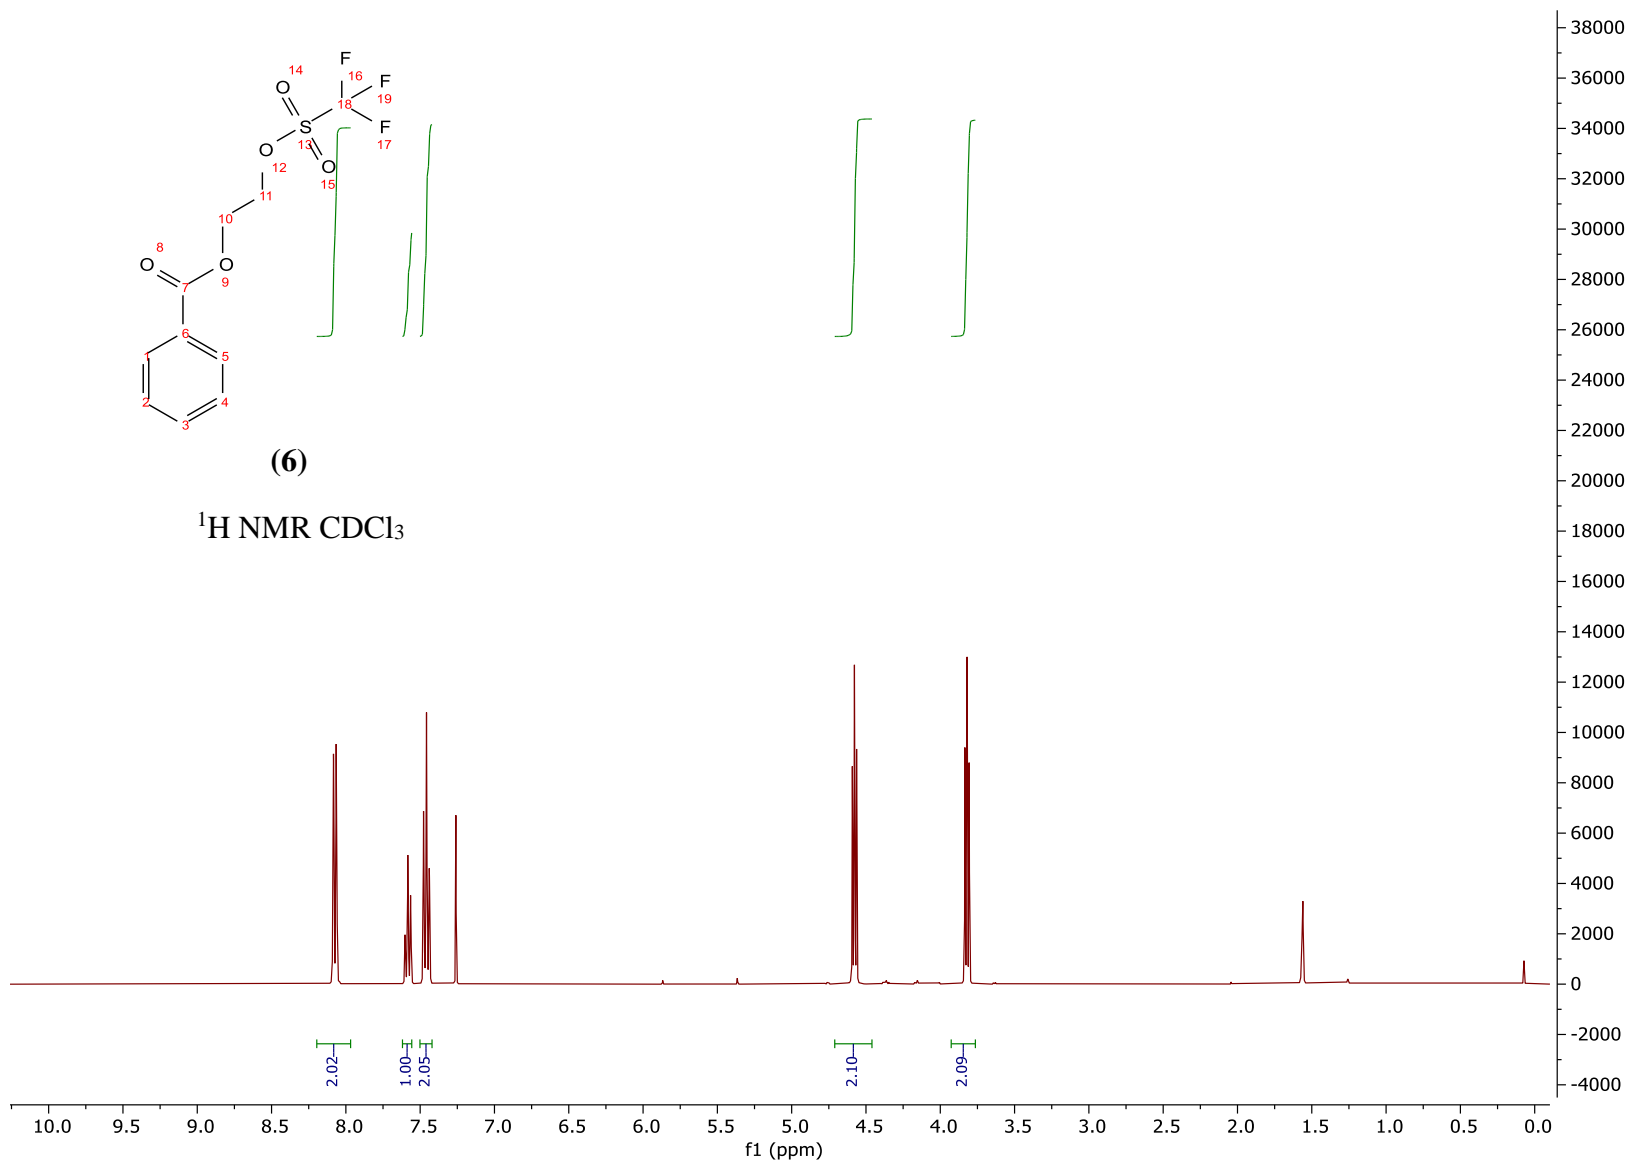

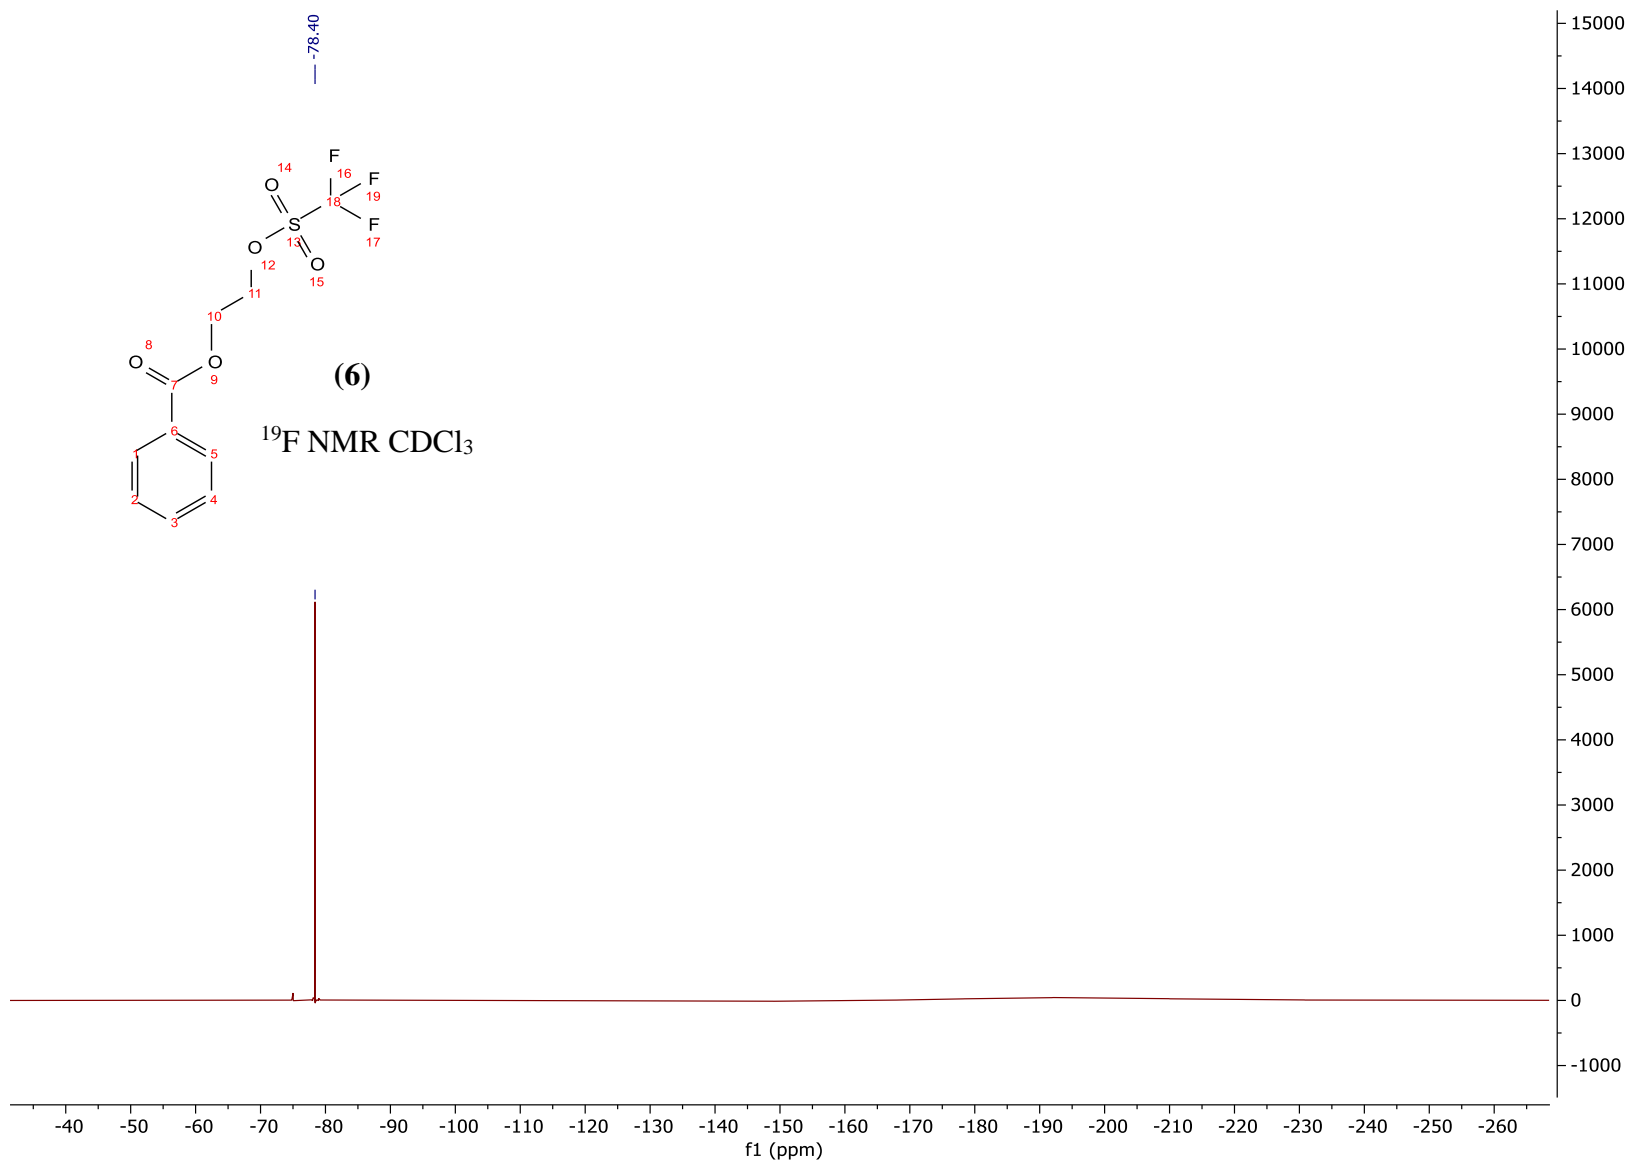

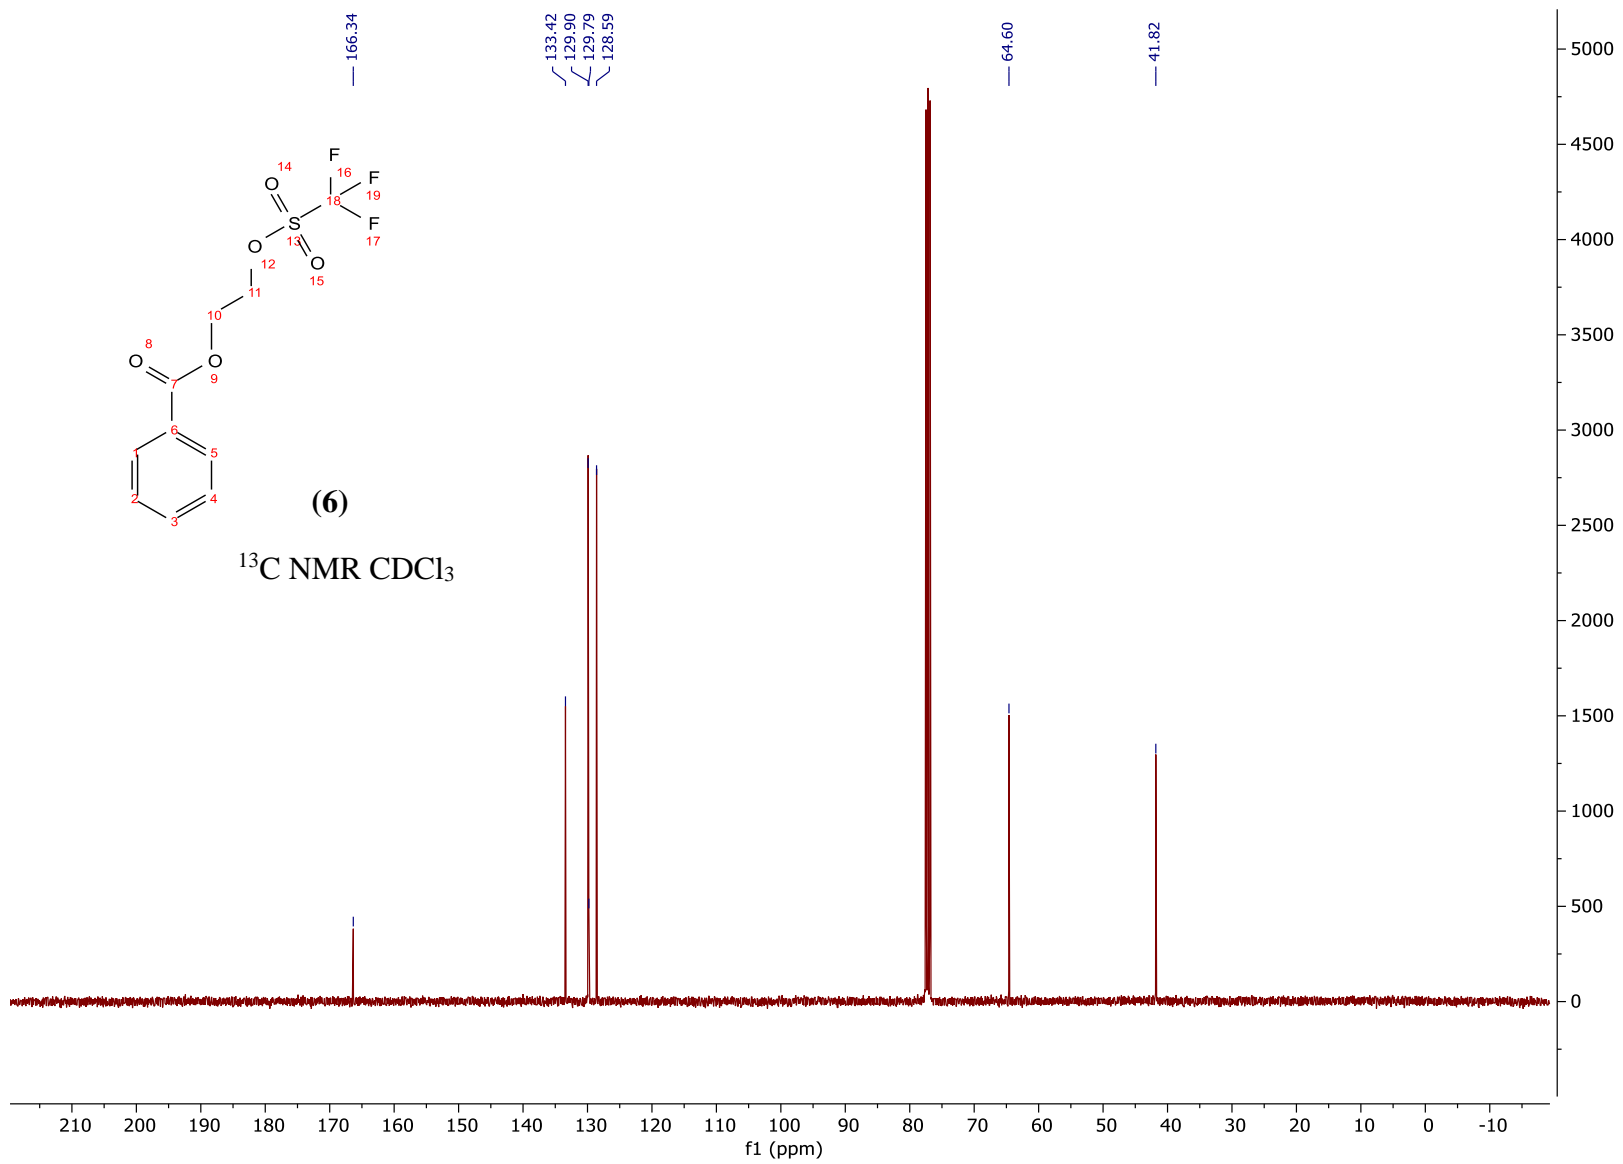

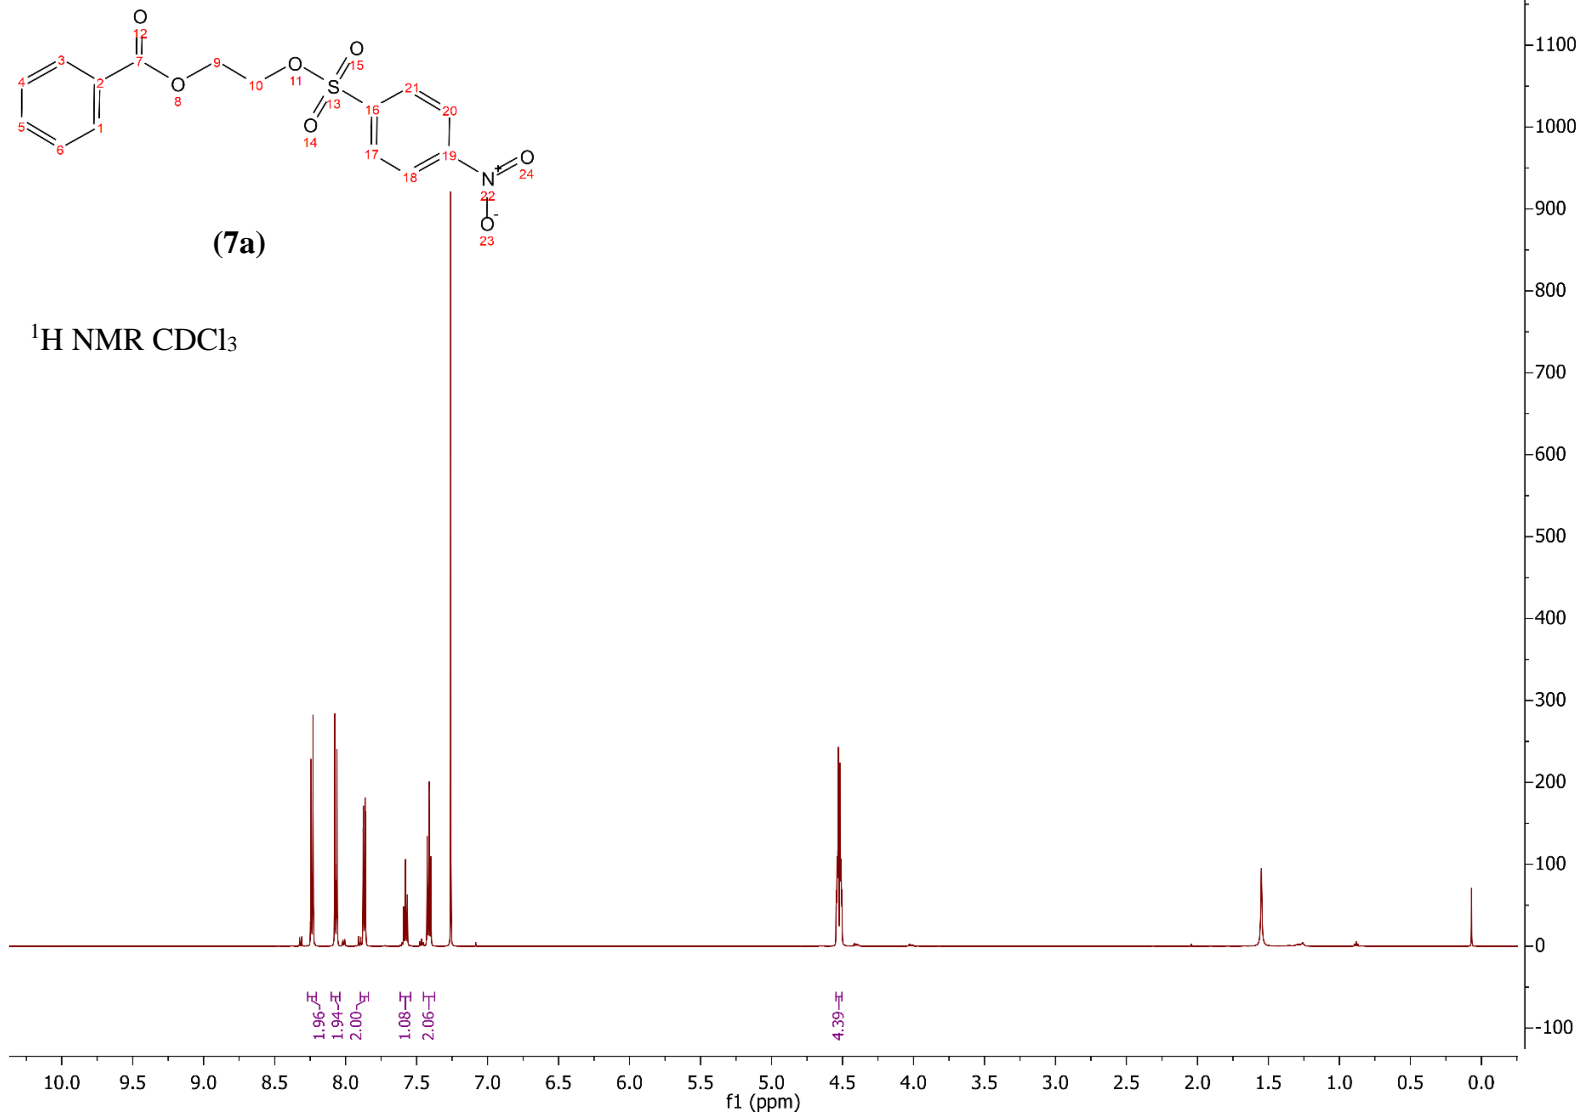

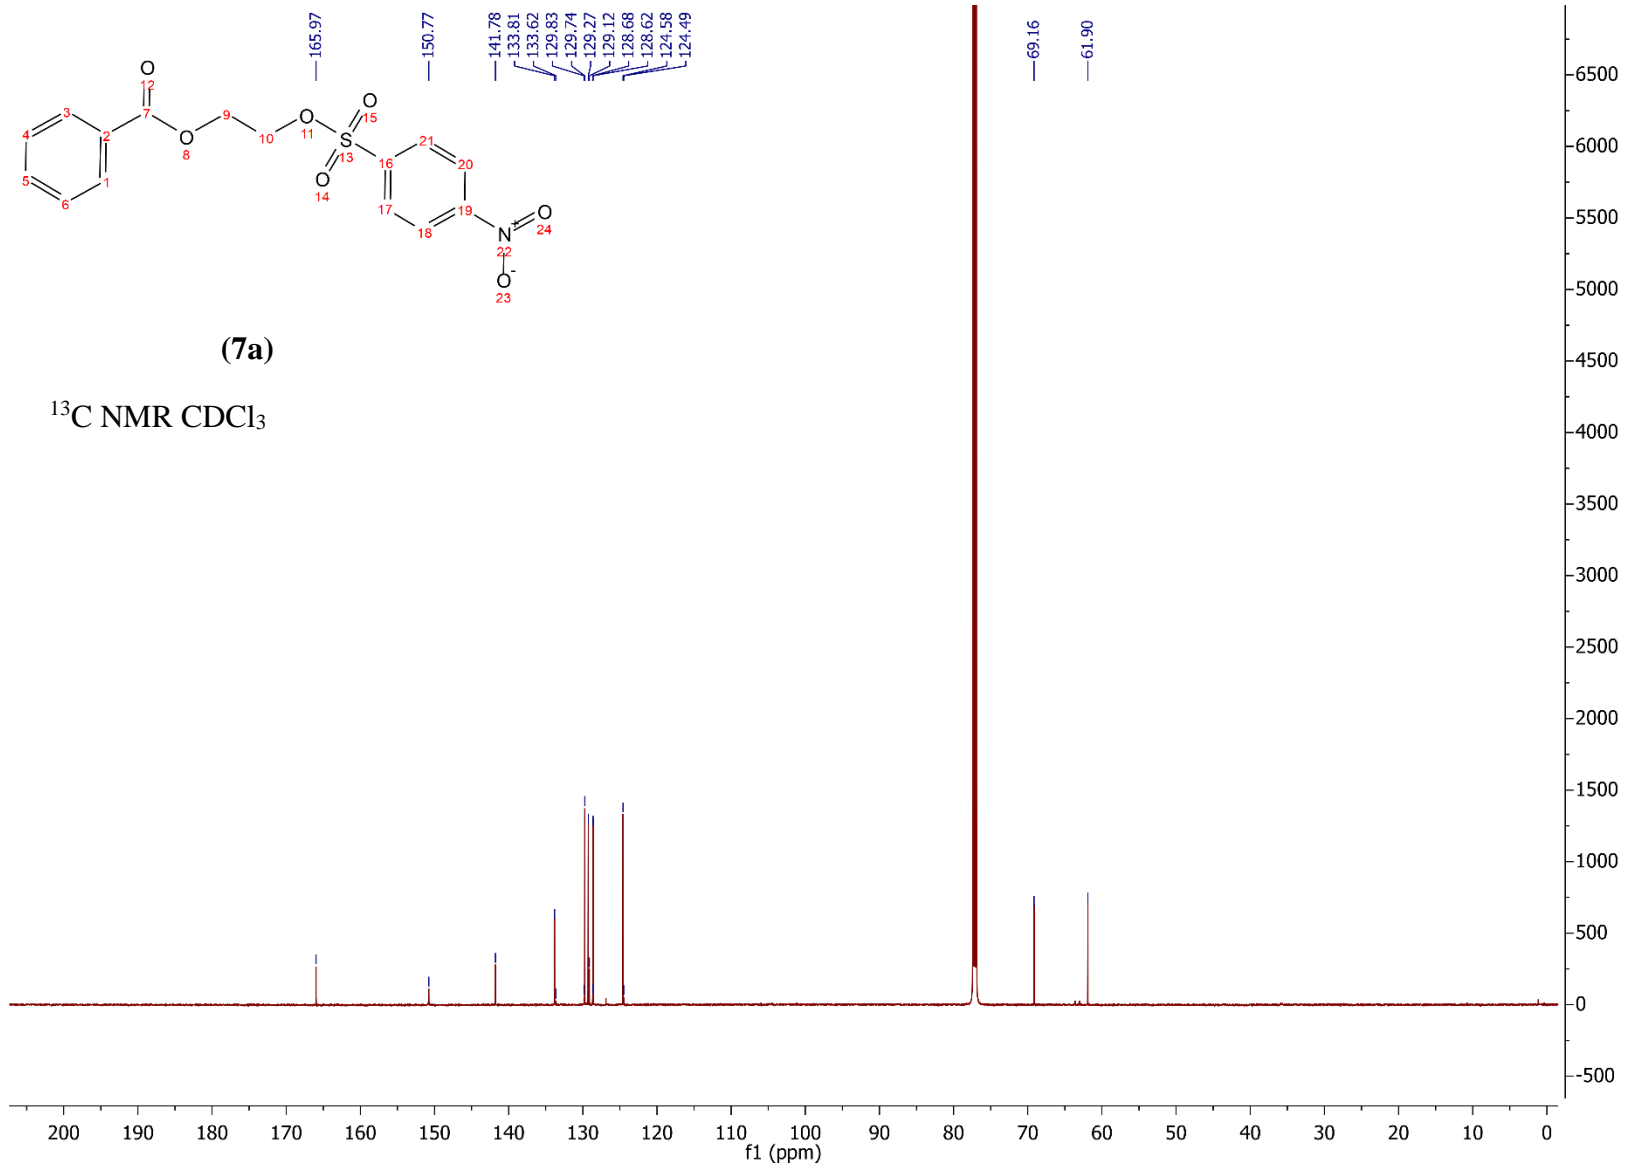

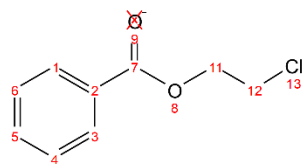

(7b)

$^1\text{H NMR CDCl}_3$

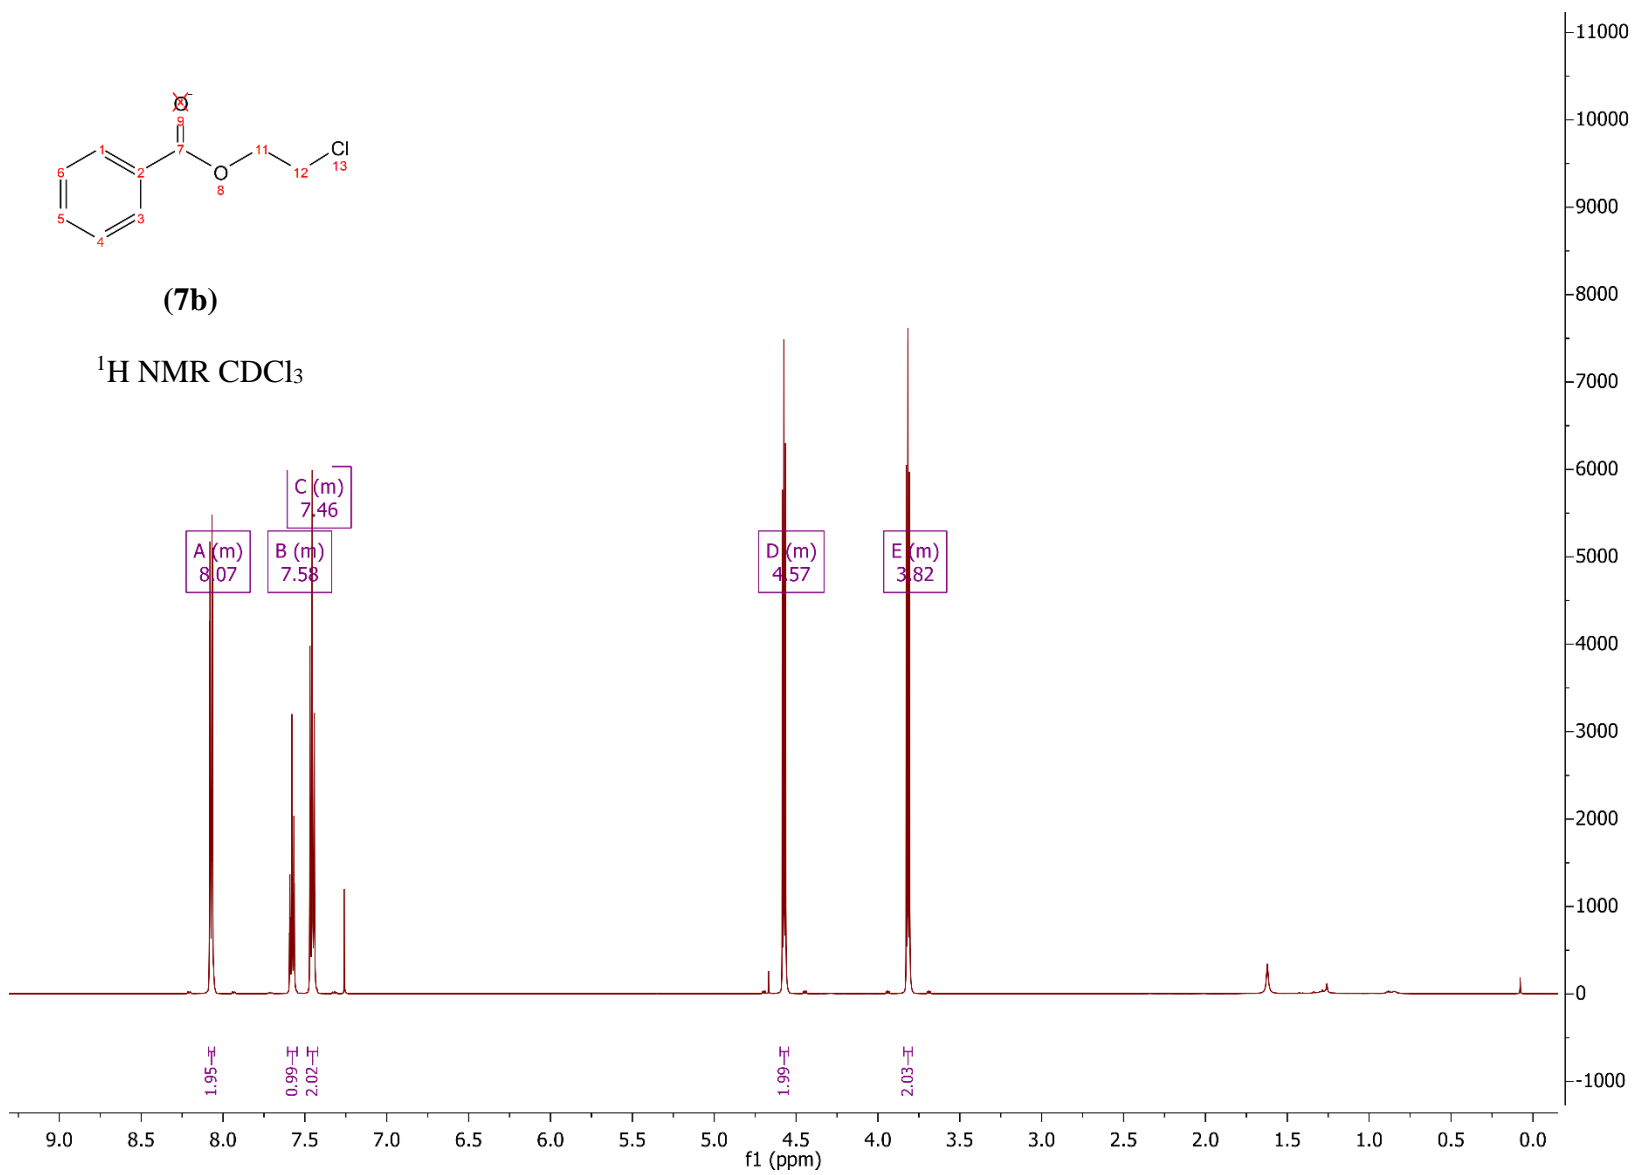

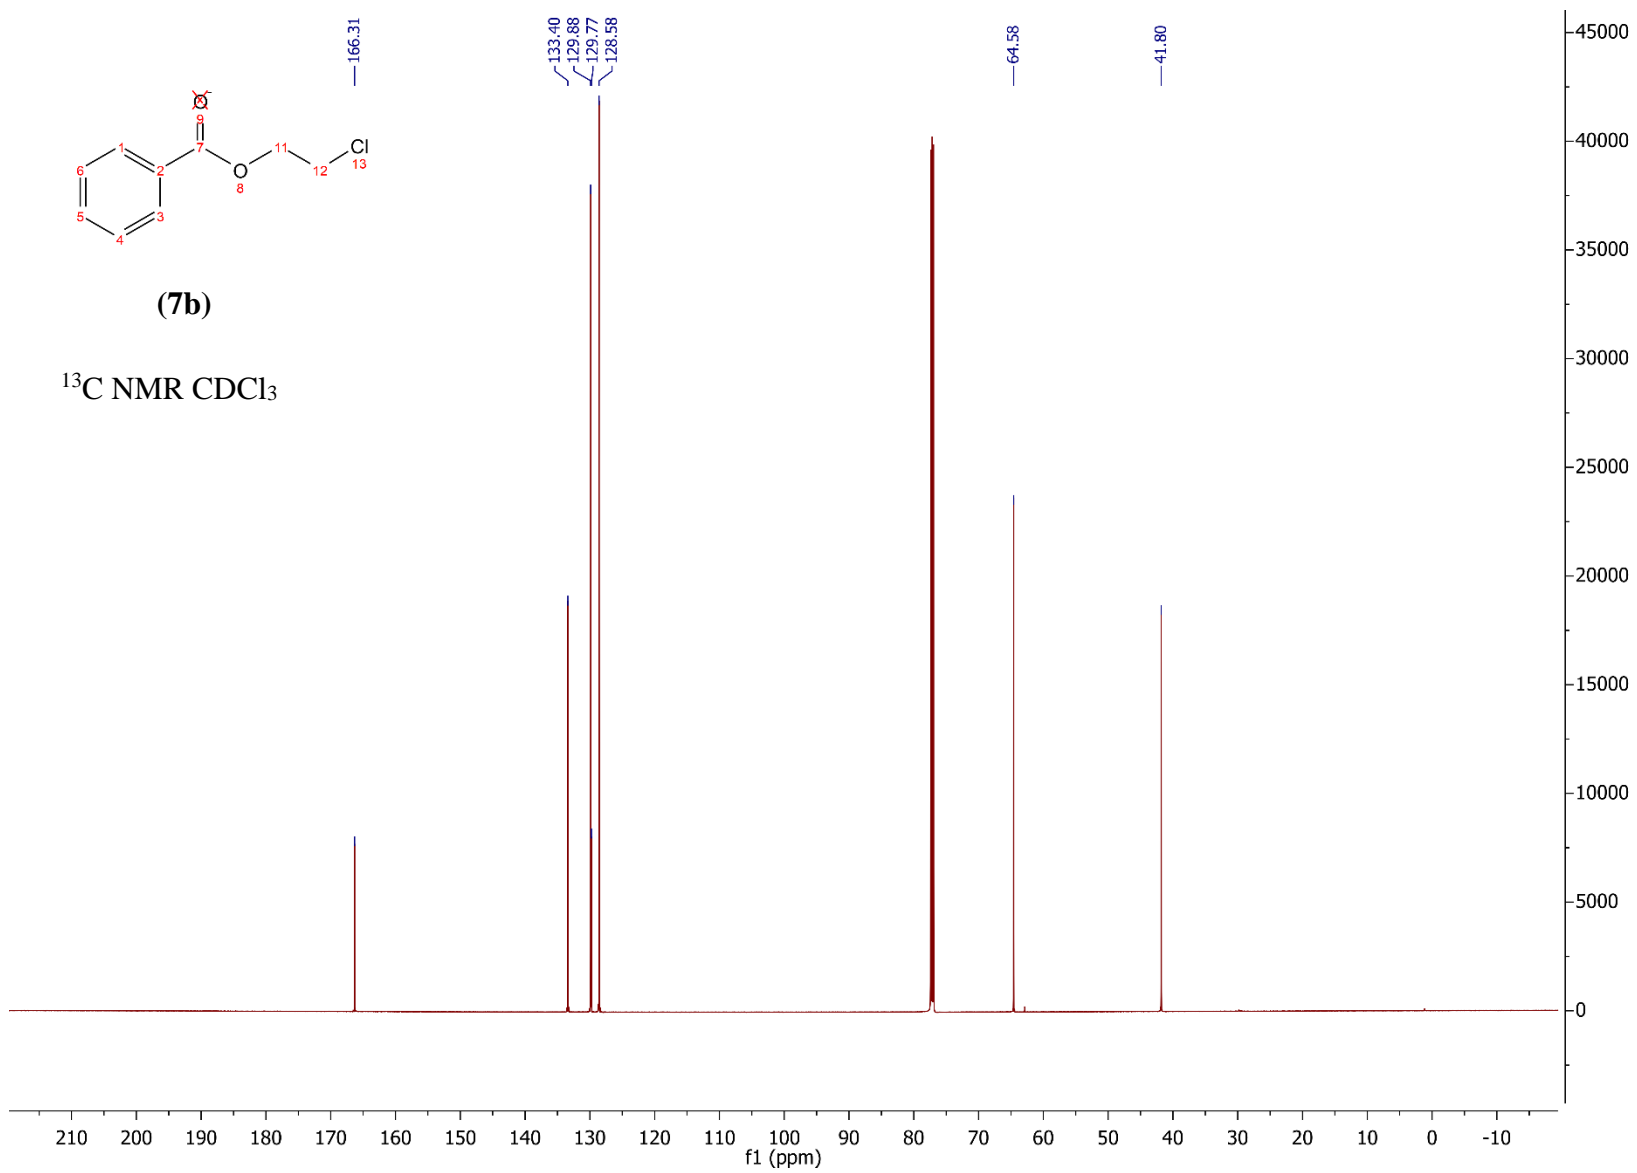

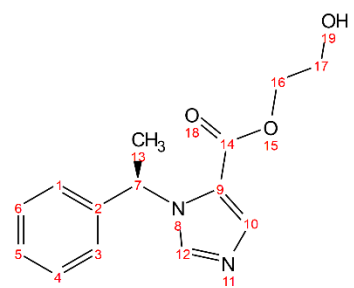

(9)

$^1\text{H NMR CDCl}_3$

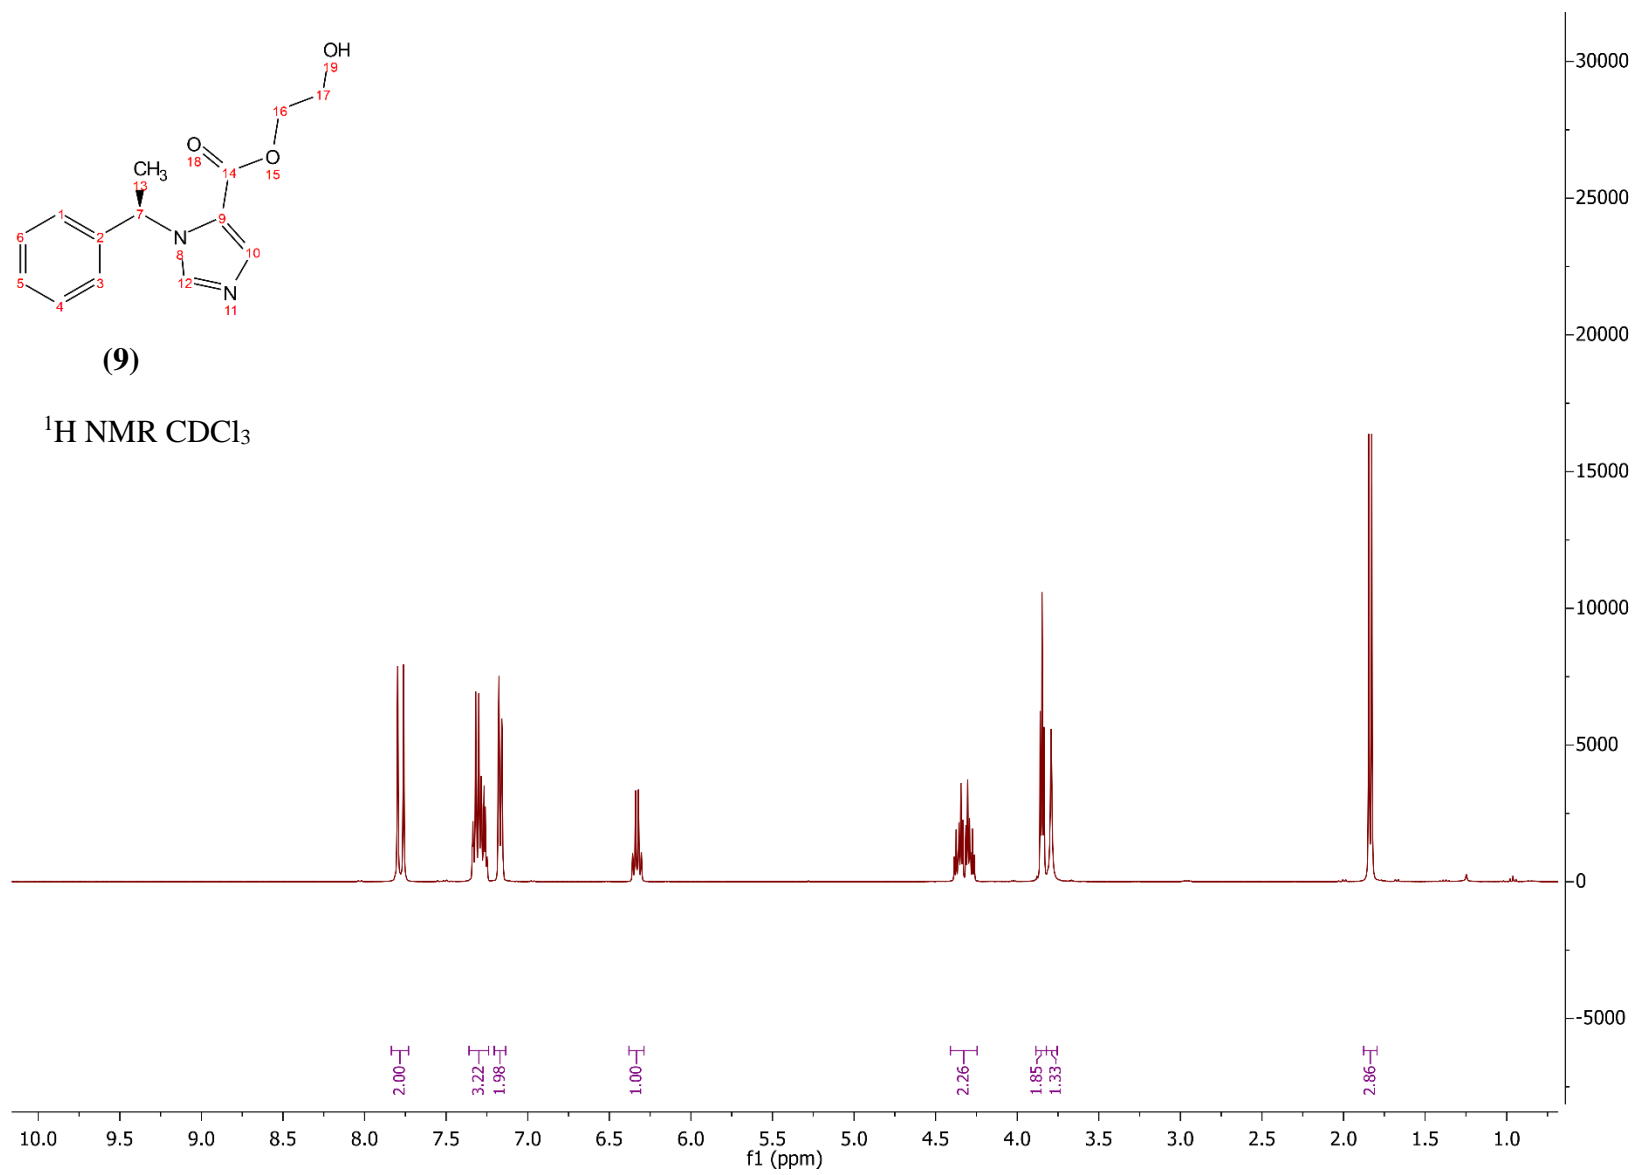



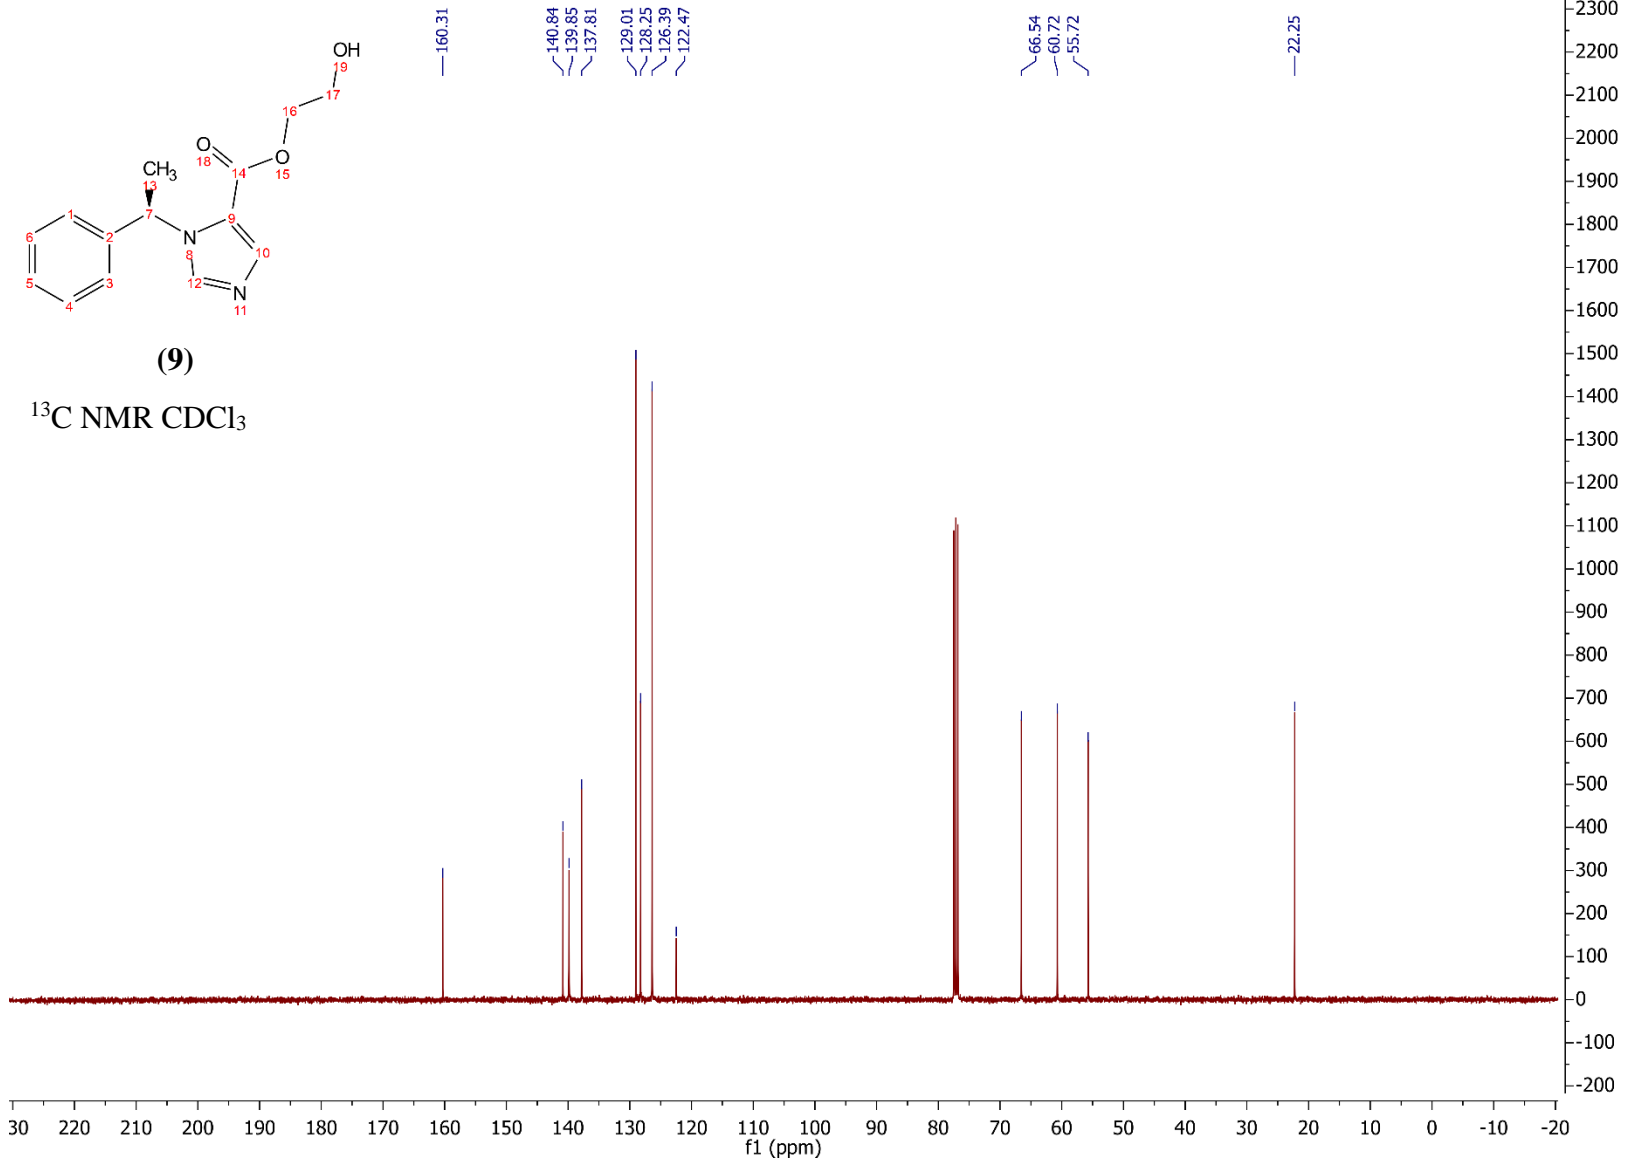

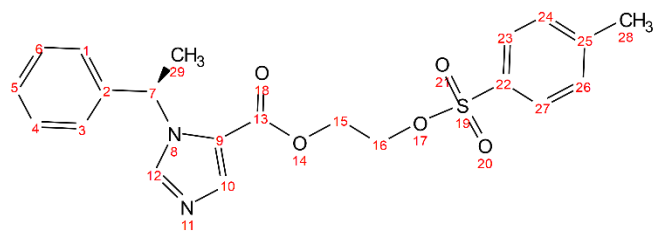

(10)

$^1\text{H}$  NMR  $\text{CDCl}_3$

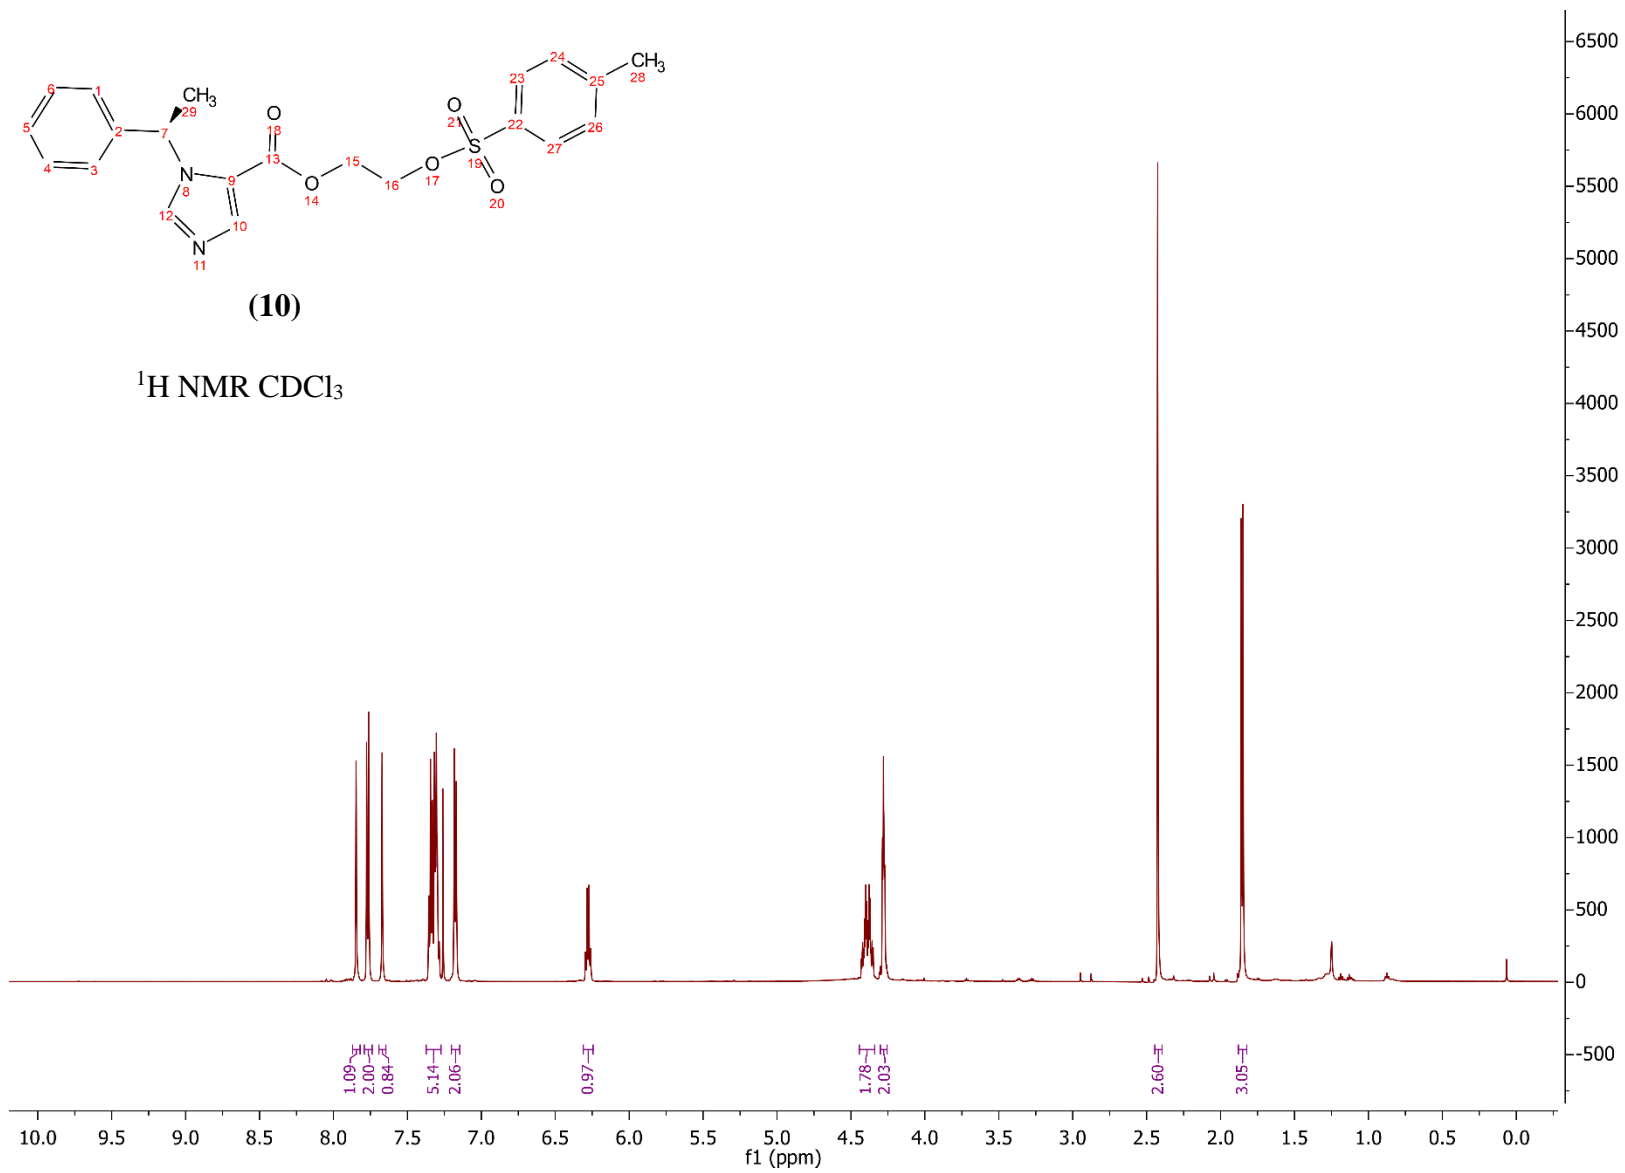

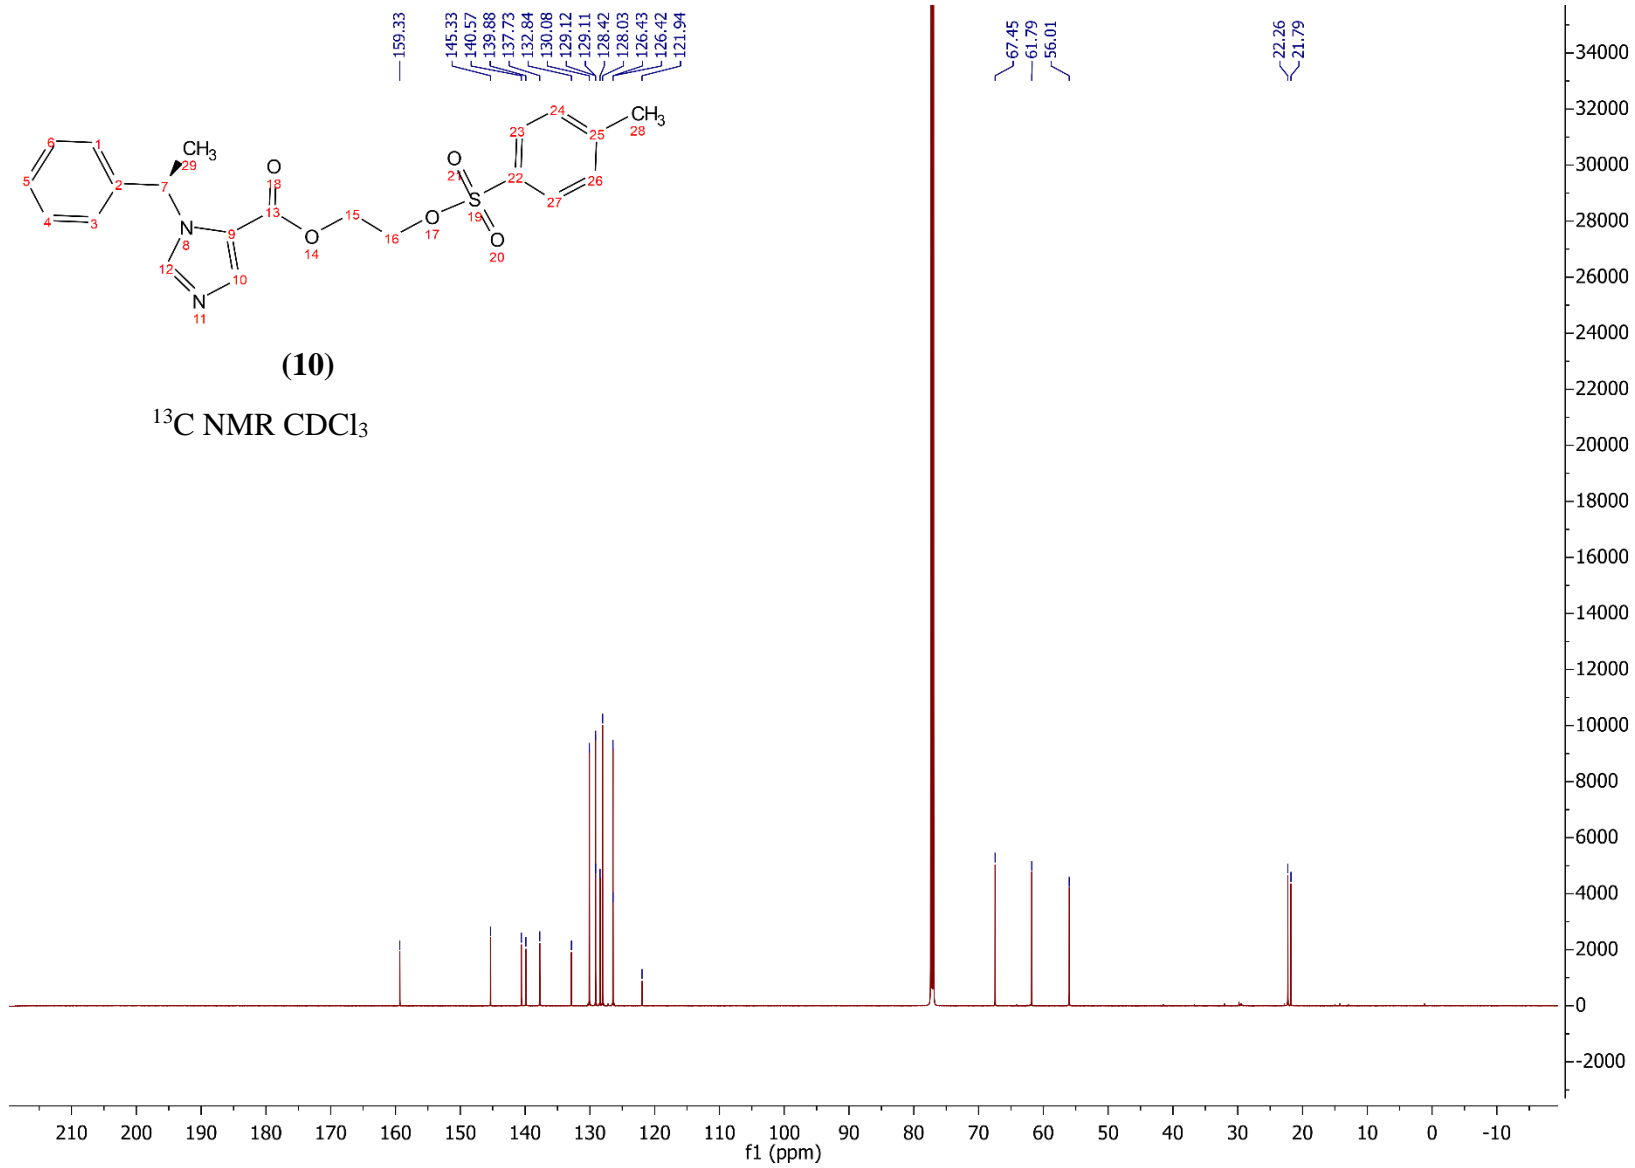

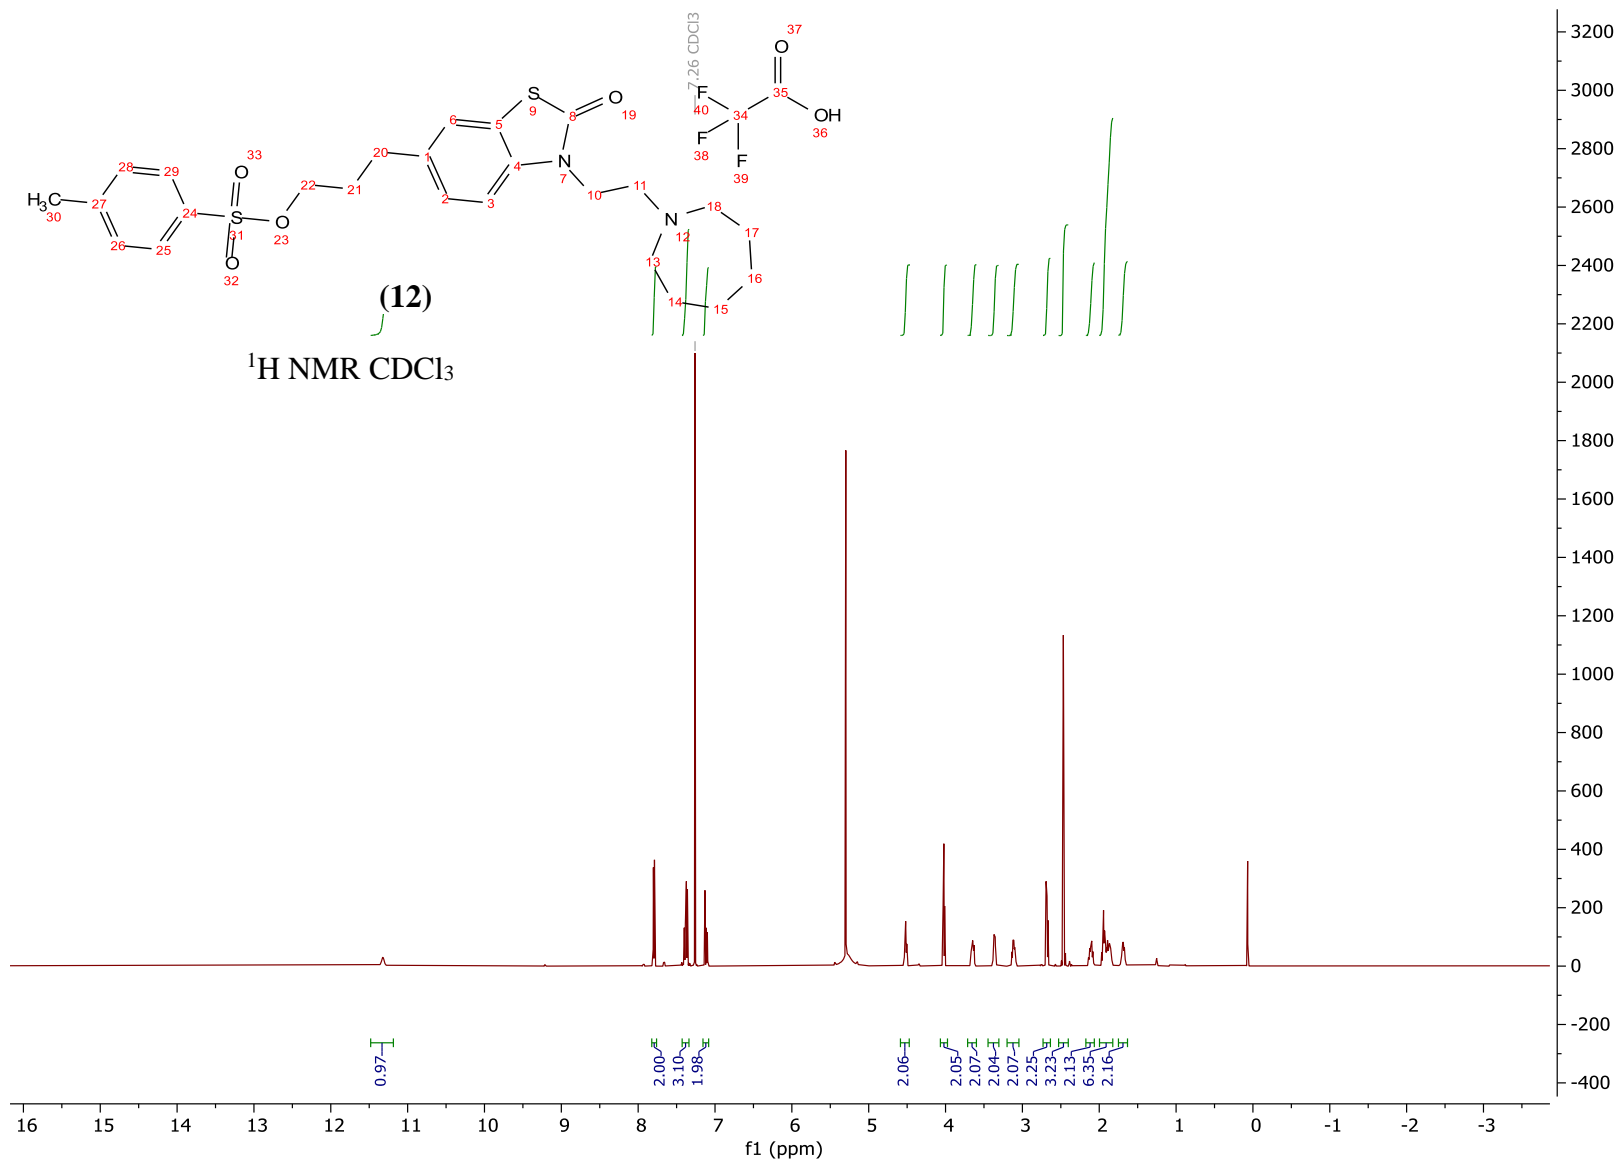

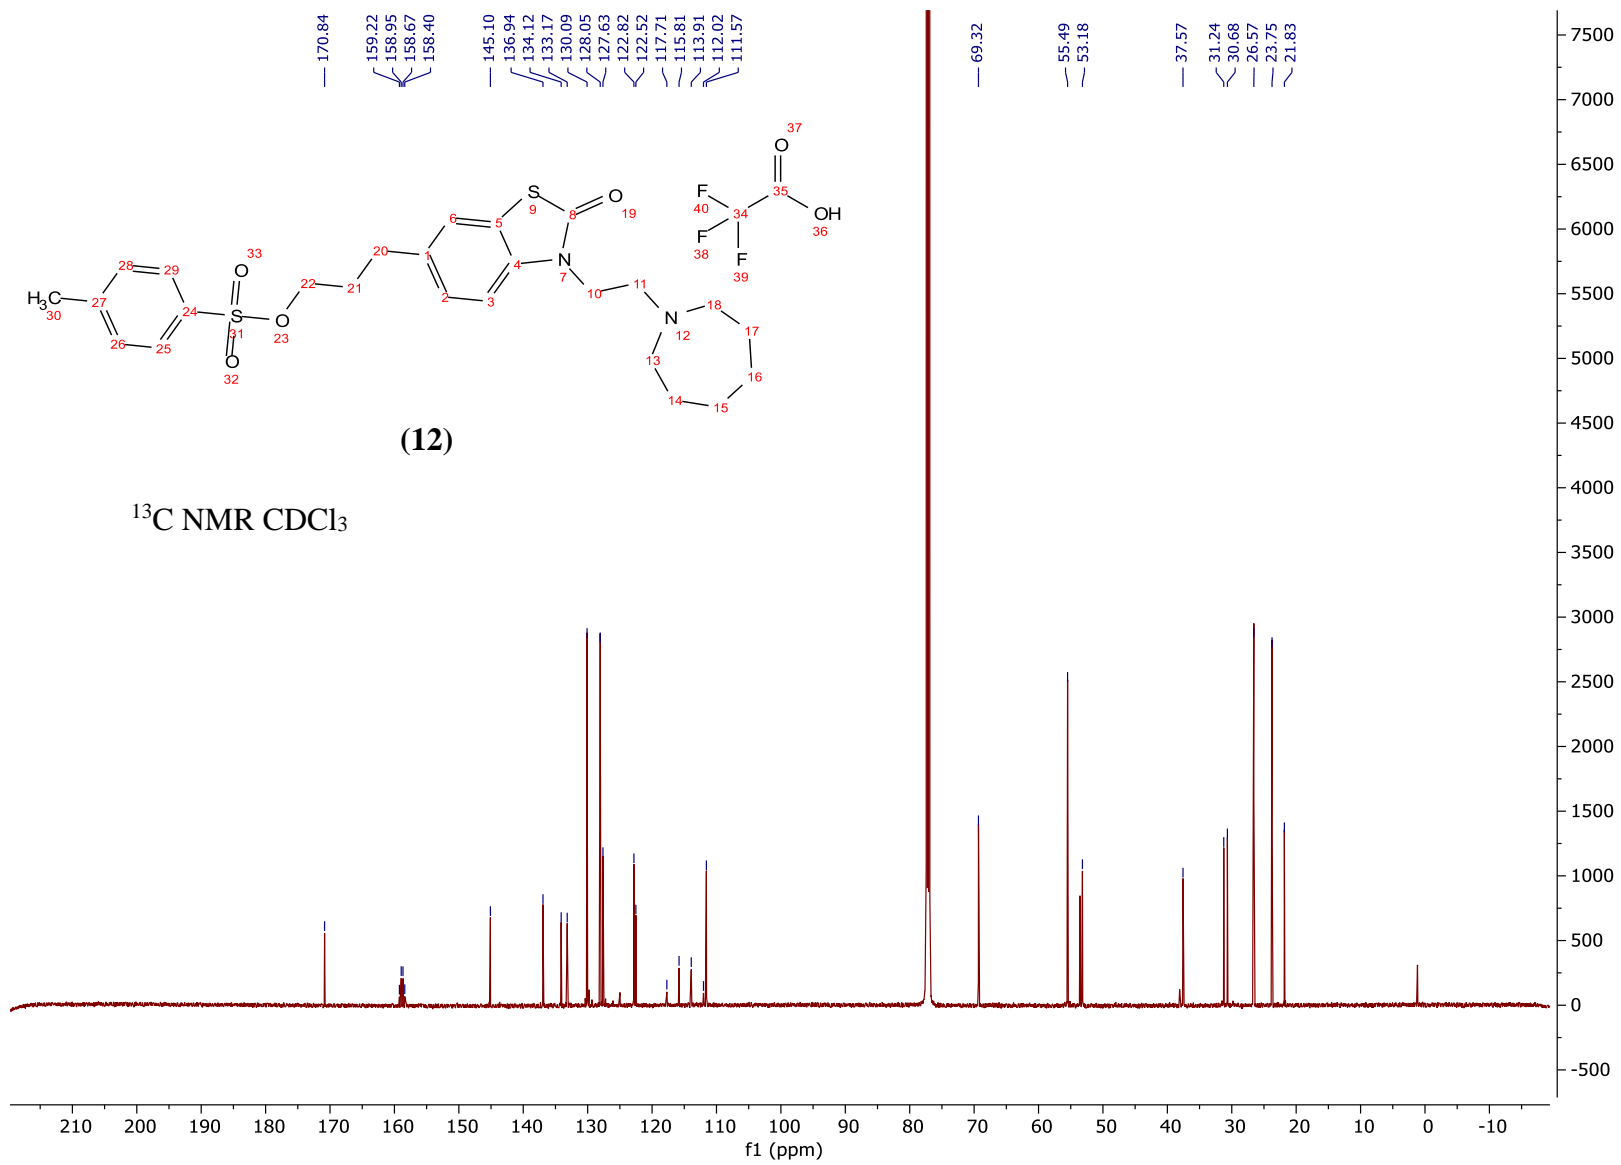

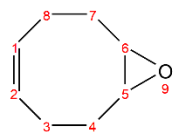

(14)

$^1\text{H NMR CDCl}_3$

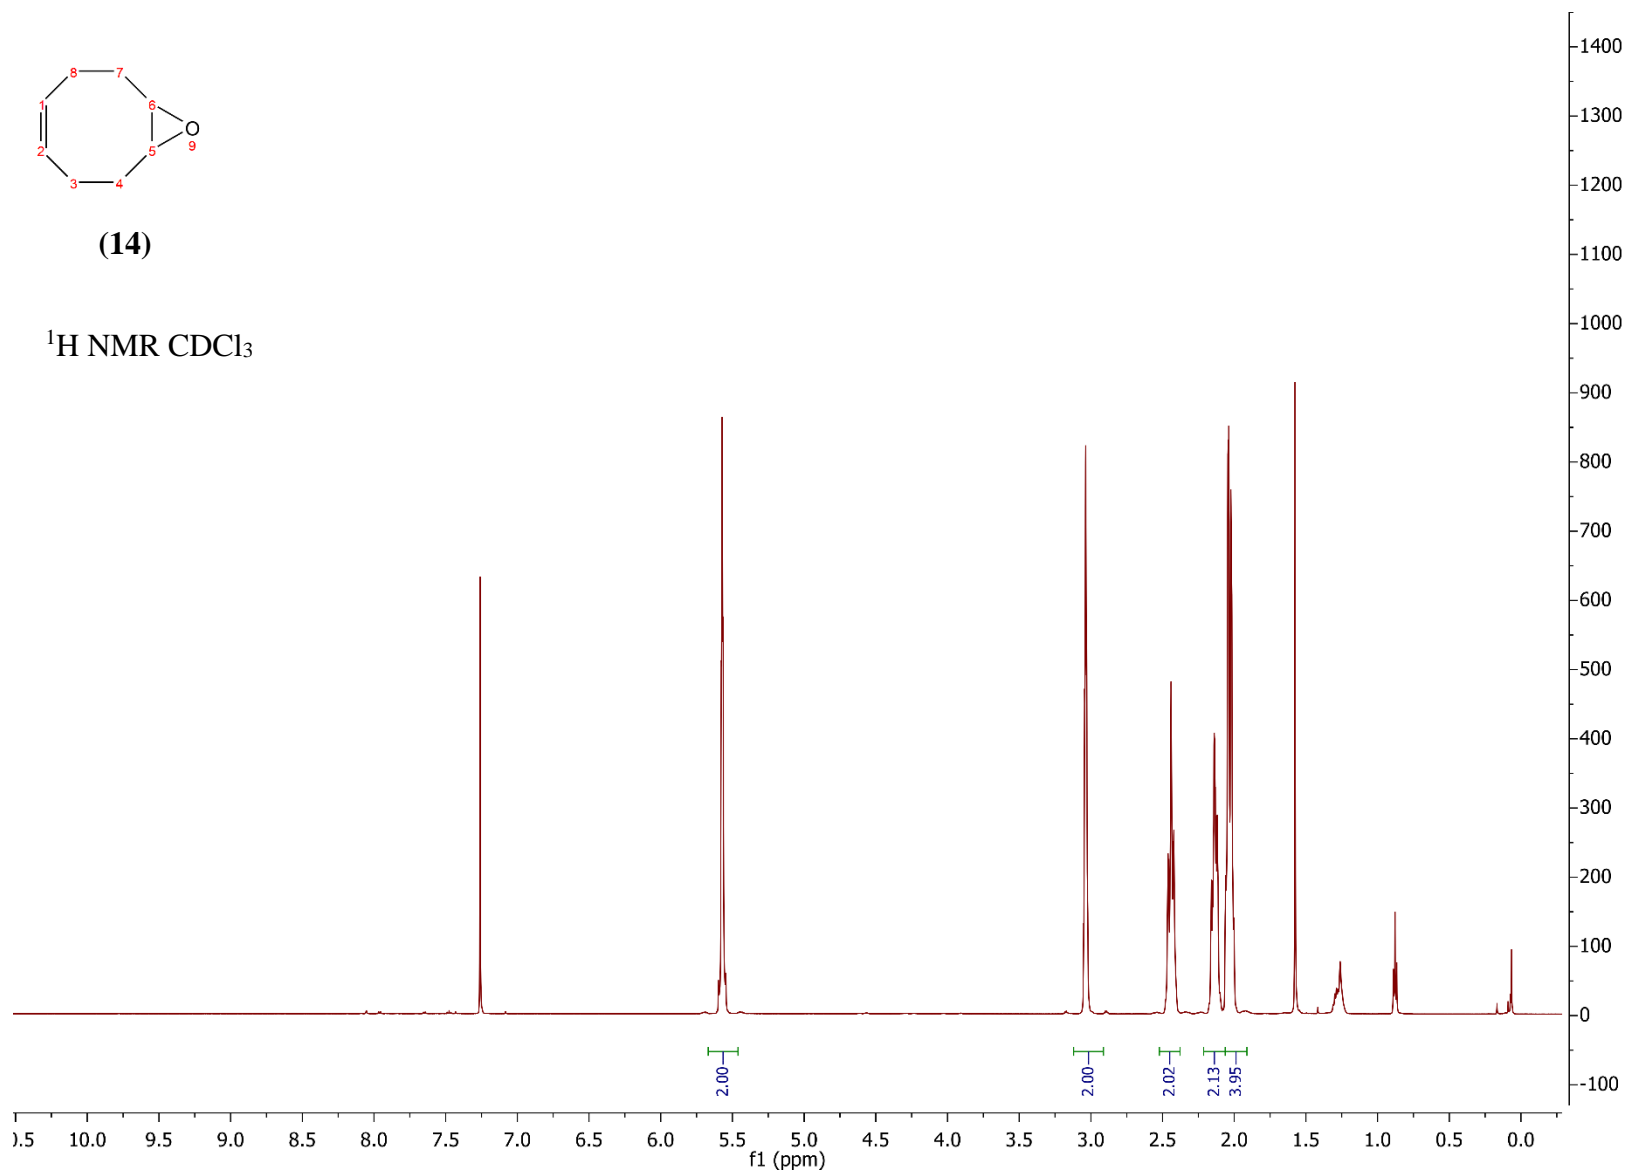

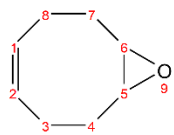

(14)

$^{13}\text{C}$  NMR  $\text{CDCl}_3$

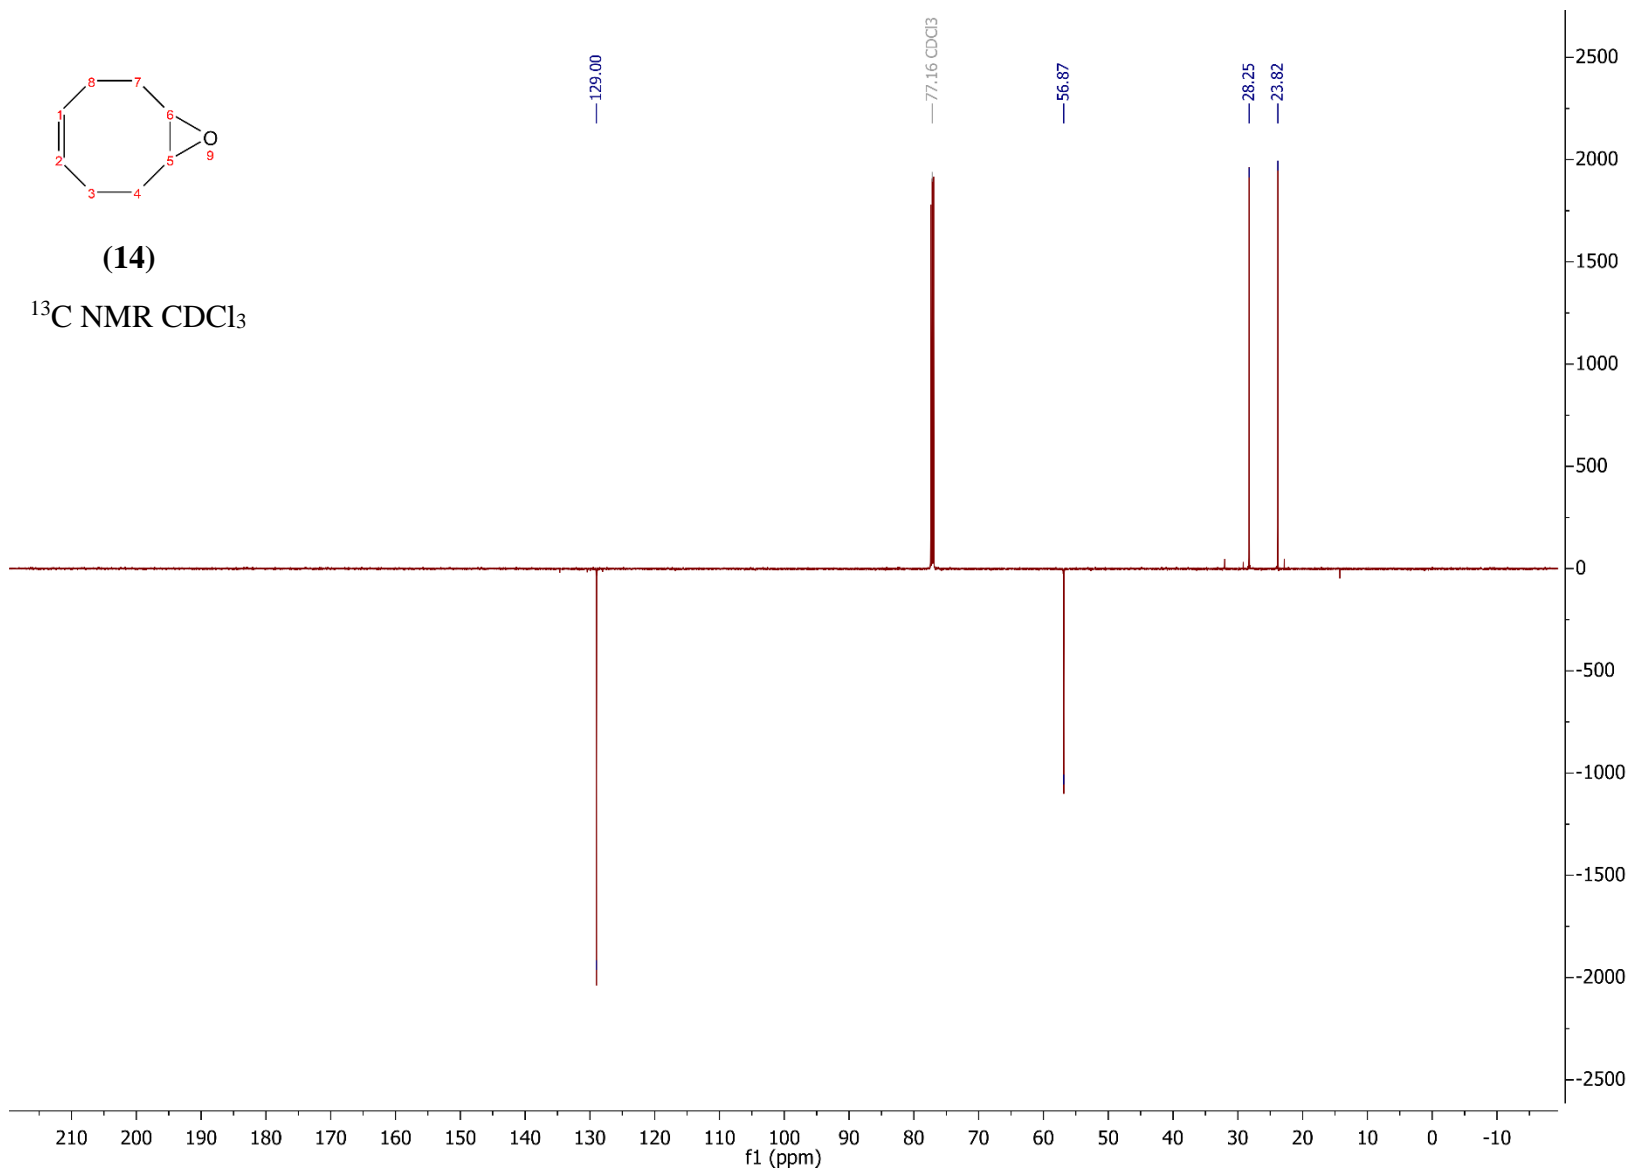

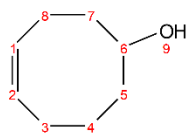

(15)

$^1\text{H}$  NMR  $\text{CDCl}_3$

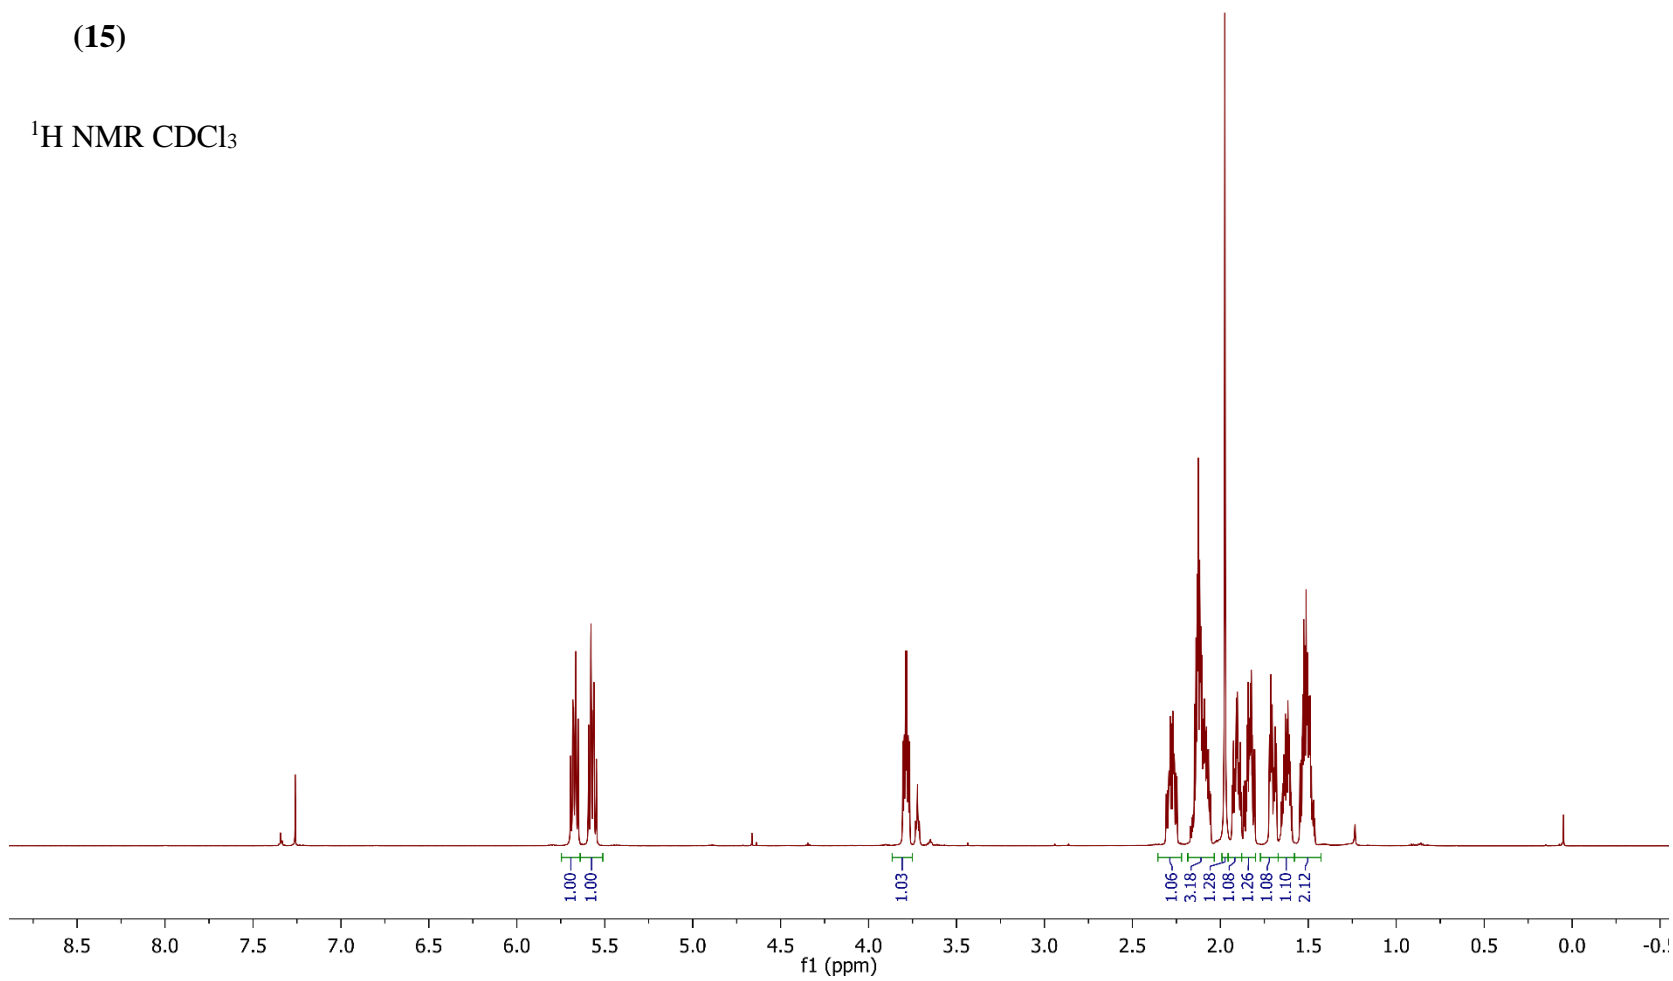



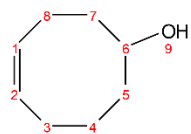

(15)

$^{13}\text{C}$  NMR  $\text{CDCl}_3$

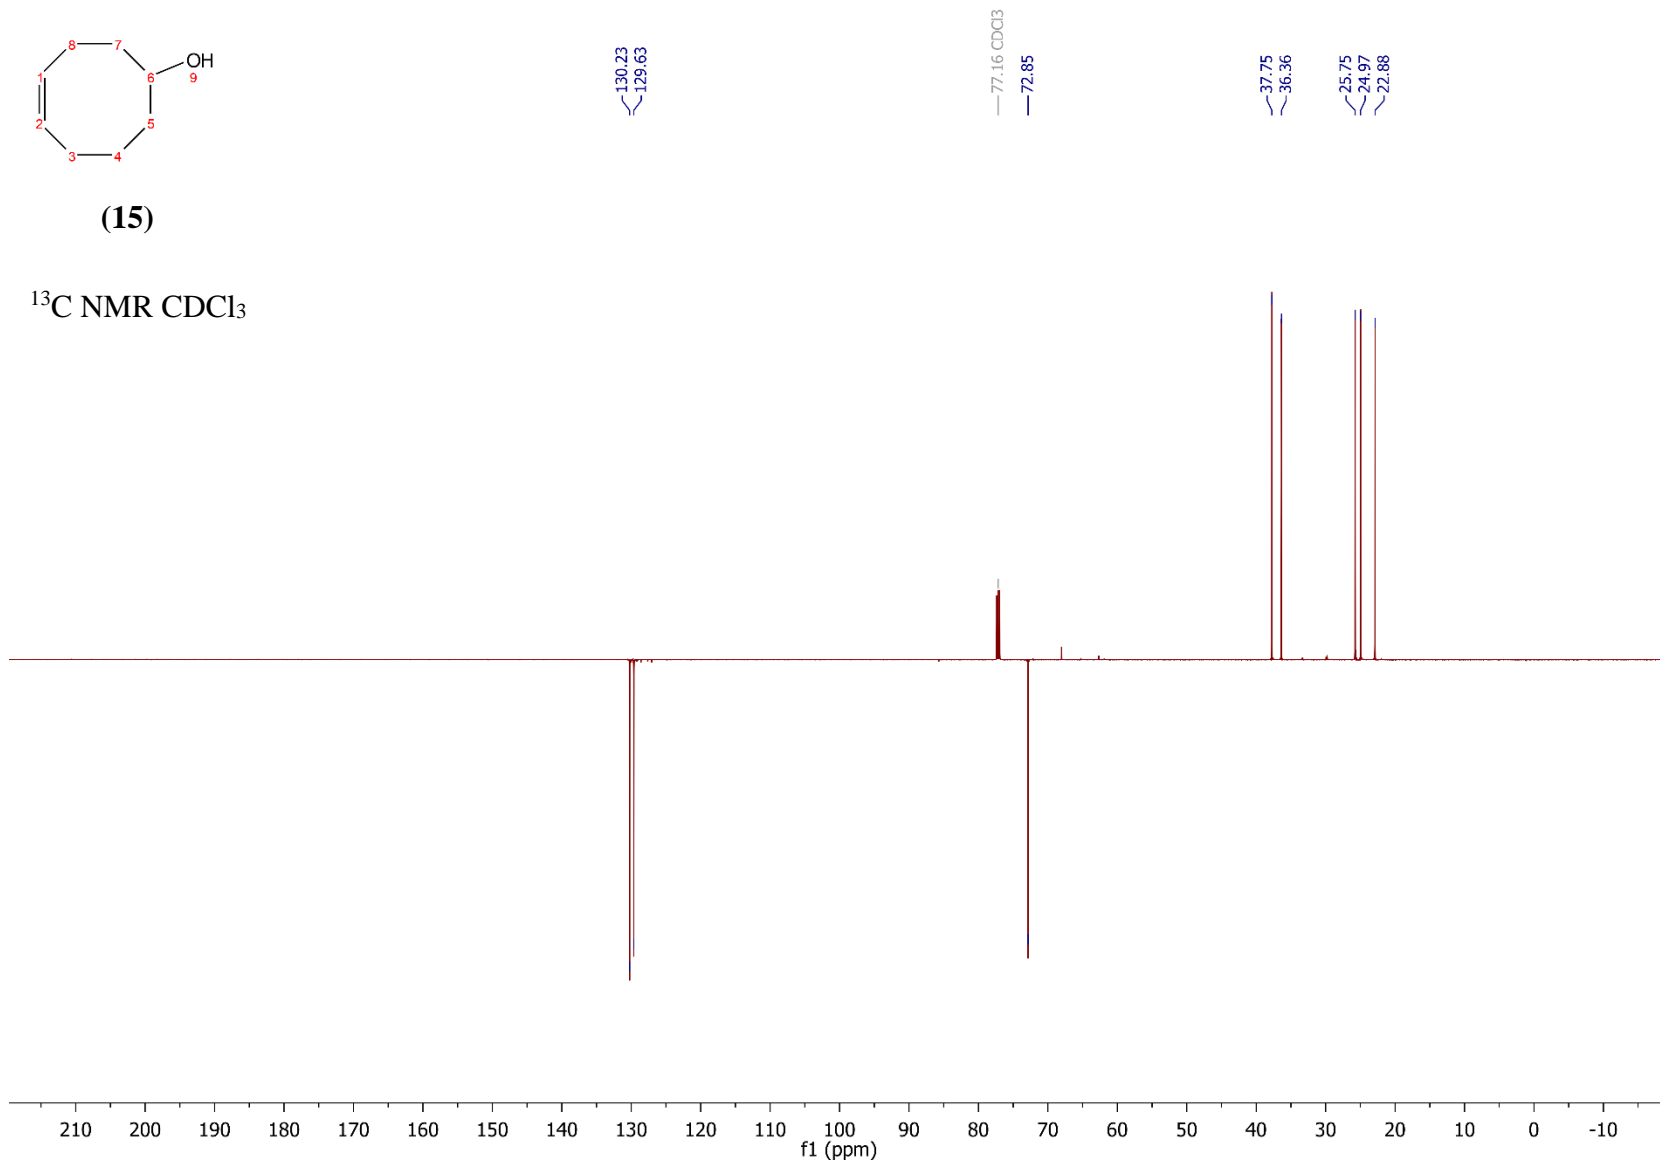

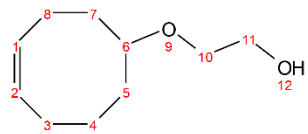

(16)

$^1\text{H NMR CDCl}_3$

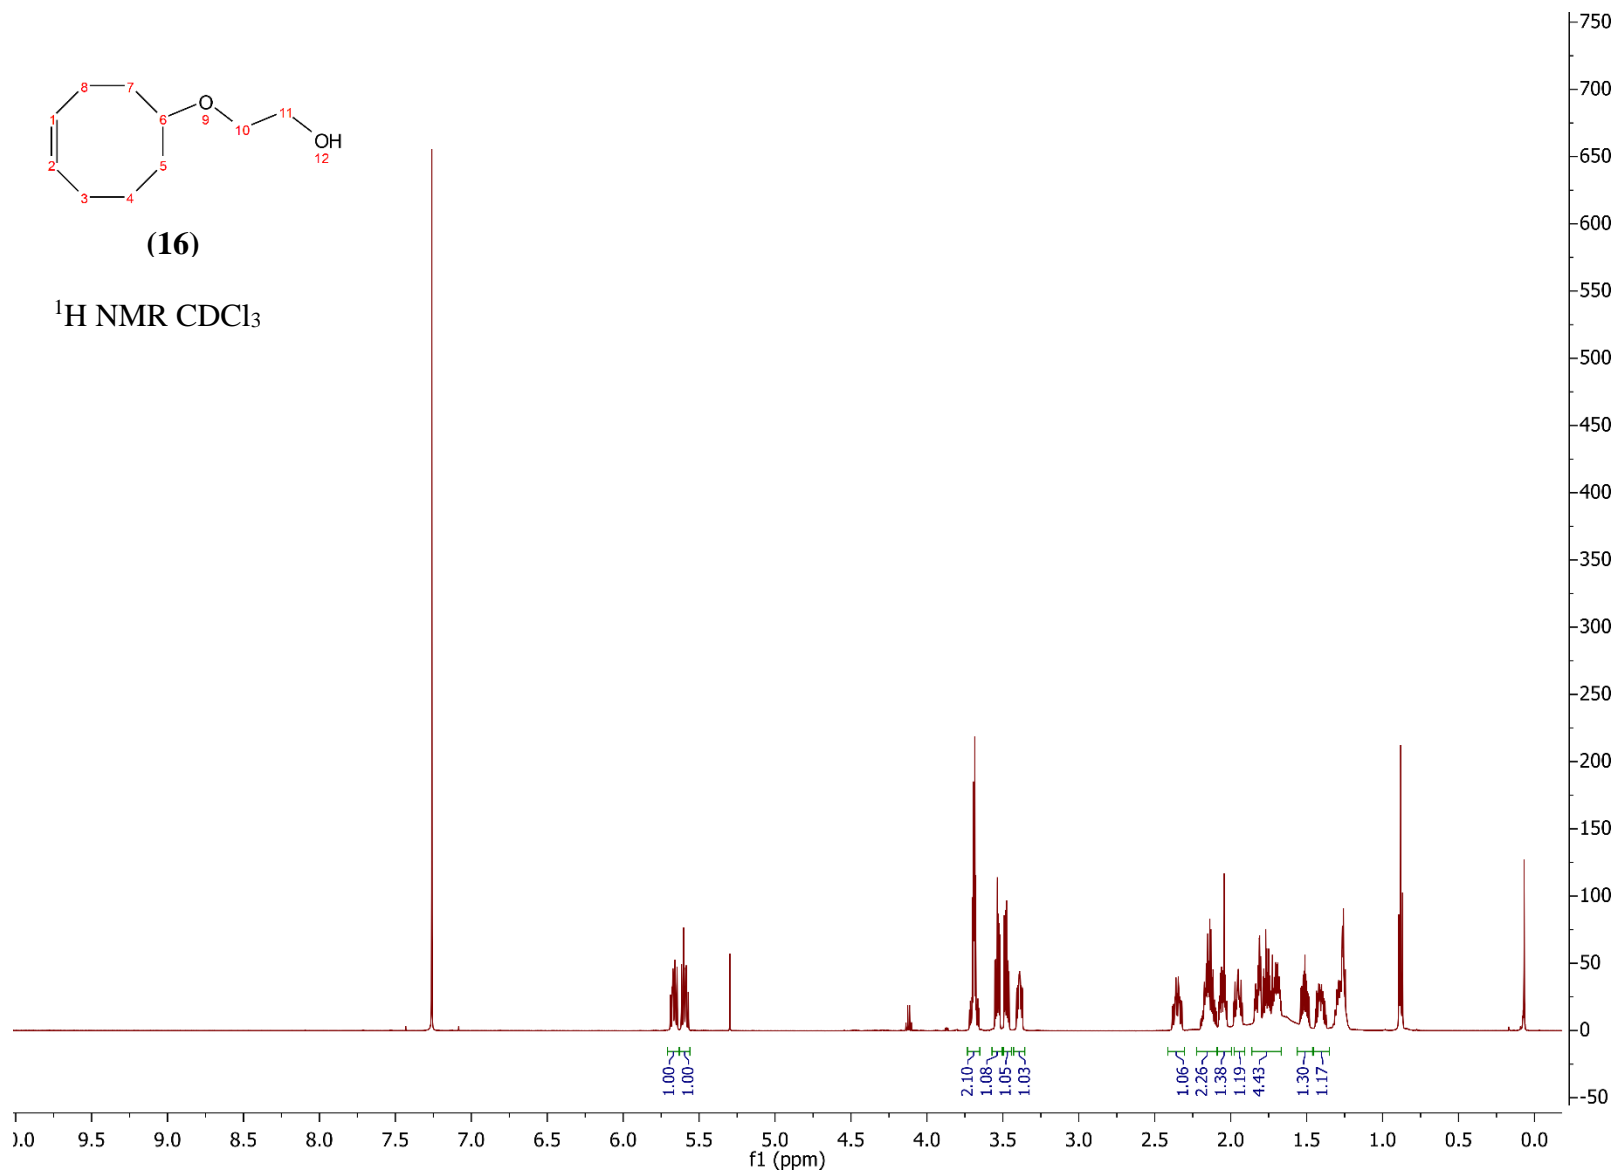



(16)

$^{13}\text{C}$  NMR  $\text{CDCl}_3$

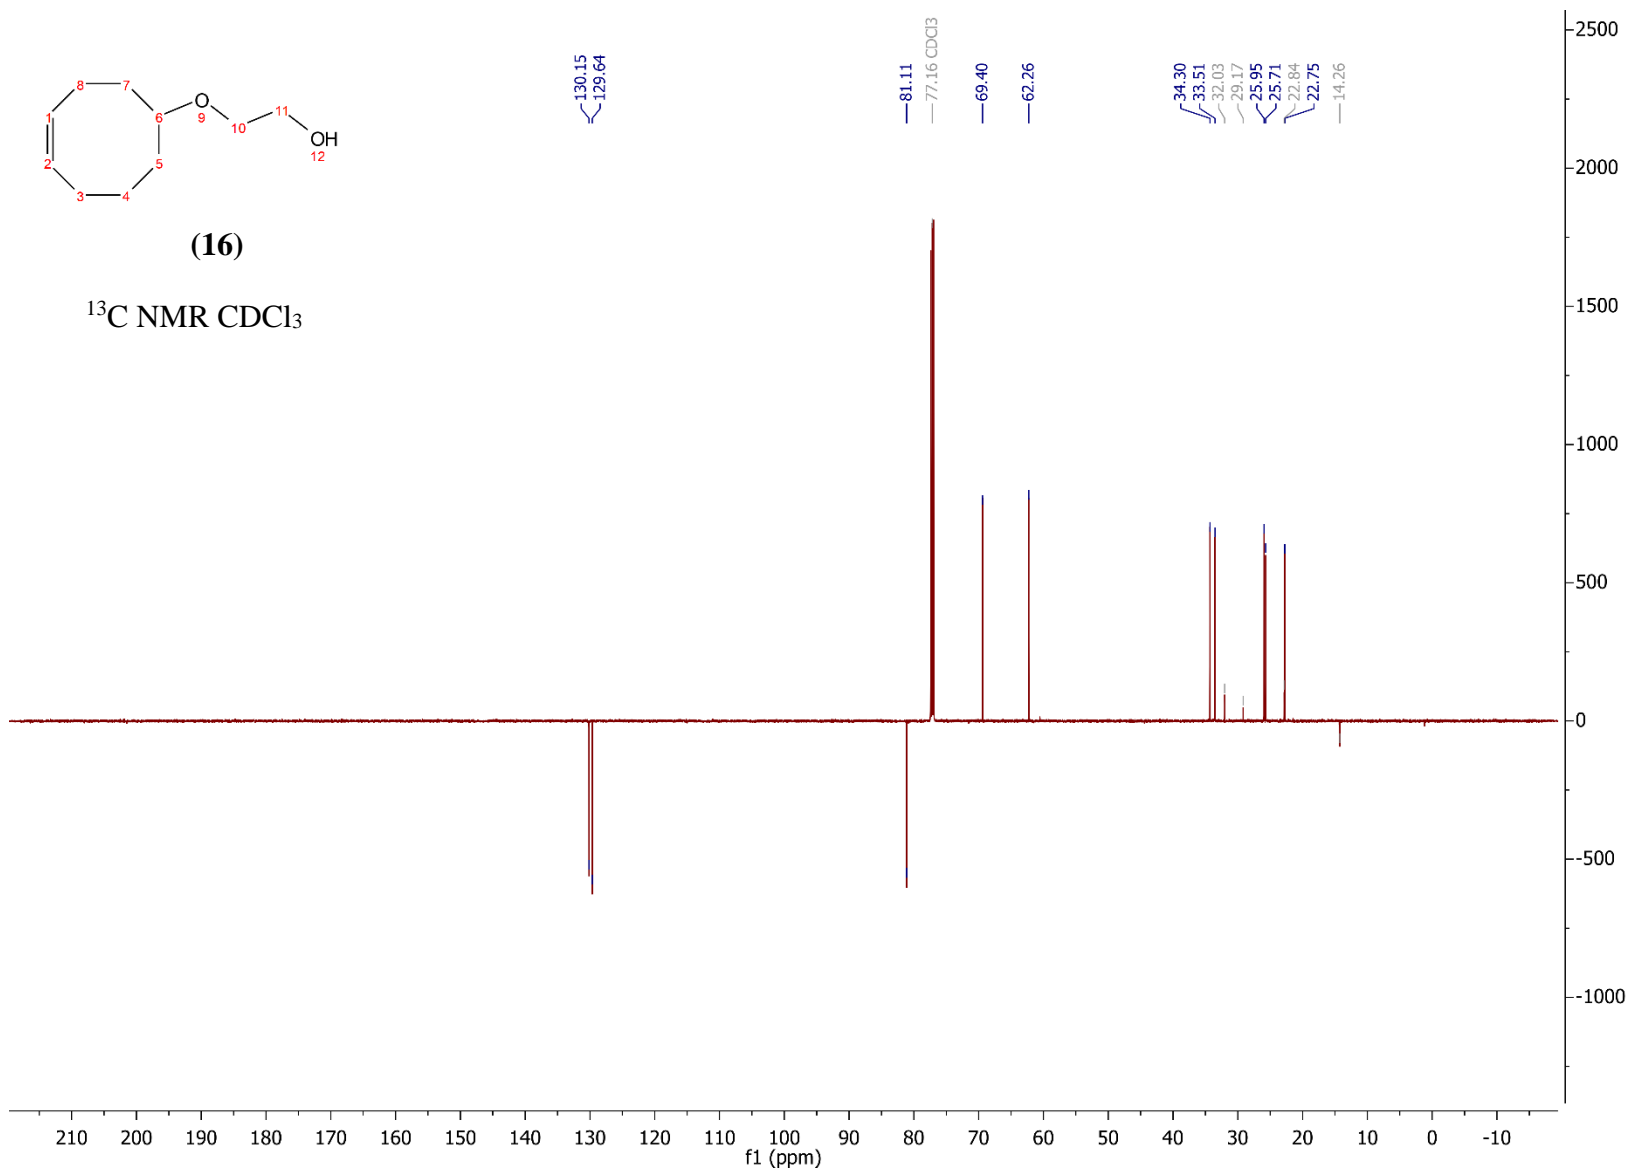

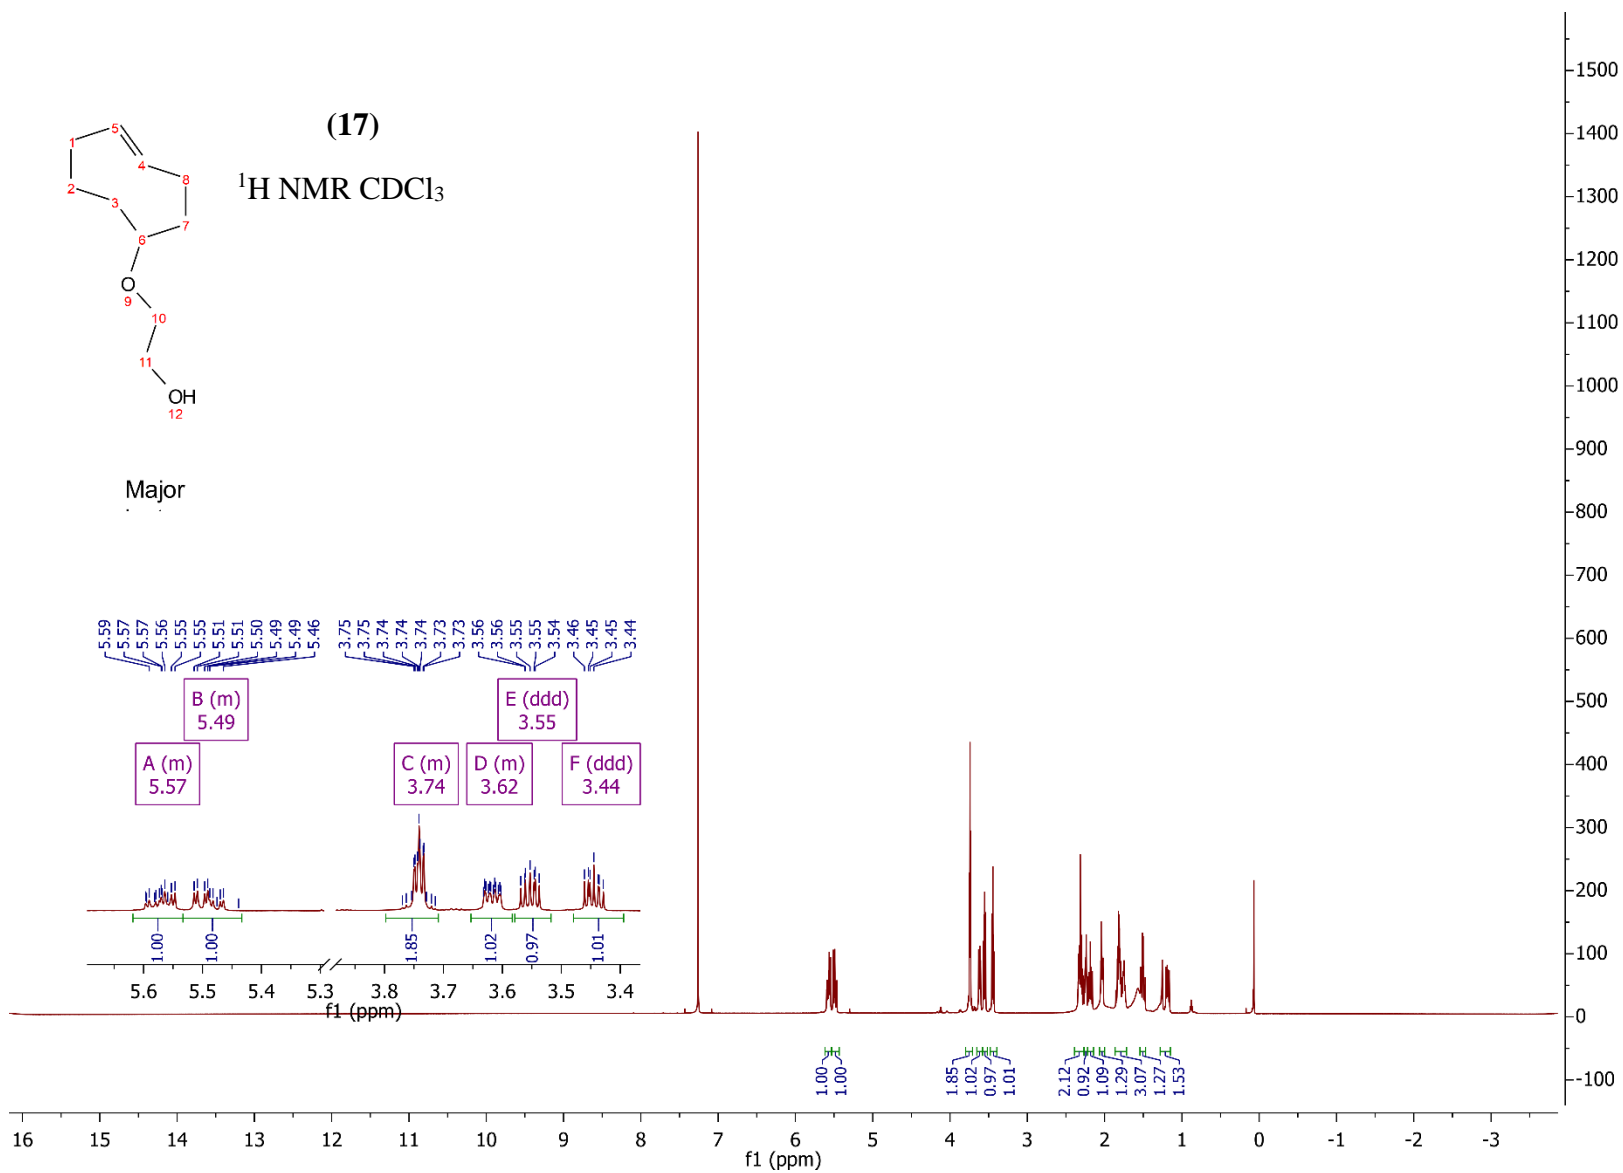

(17)

$^{13}\text{C}$  NMR  $\text{CDCl}_3$

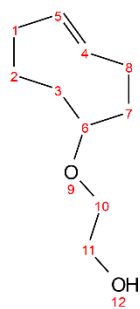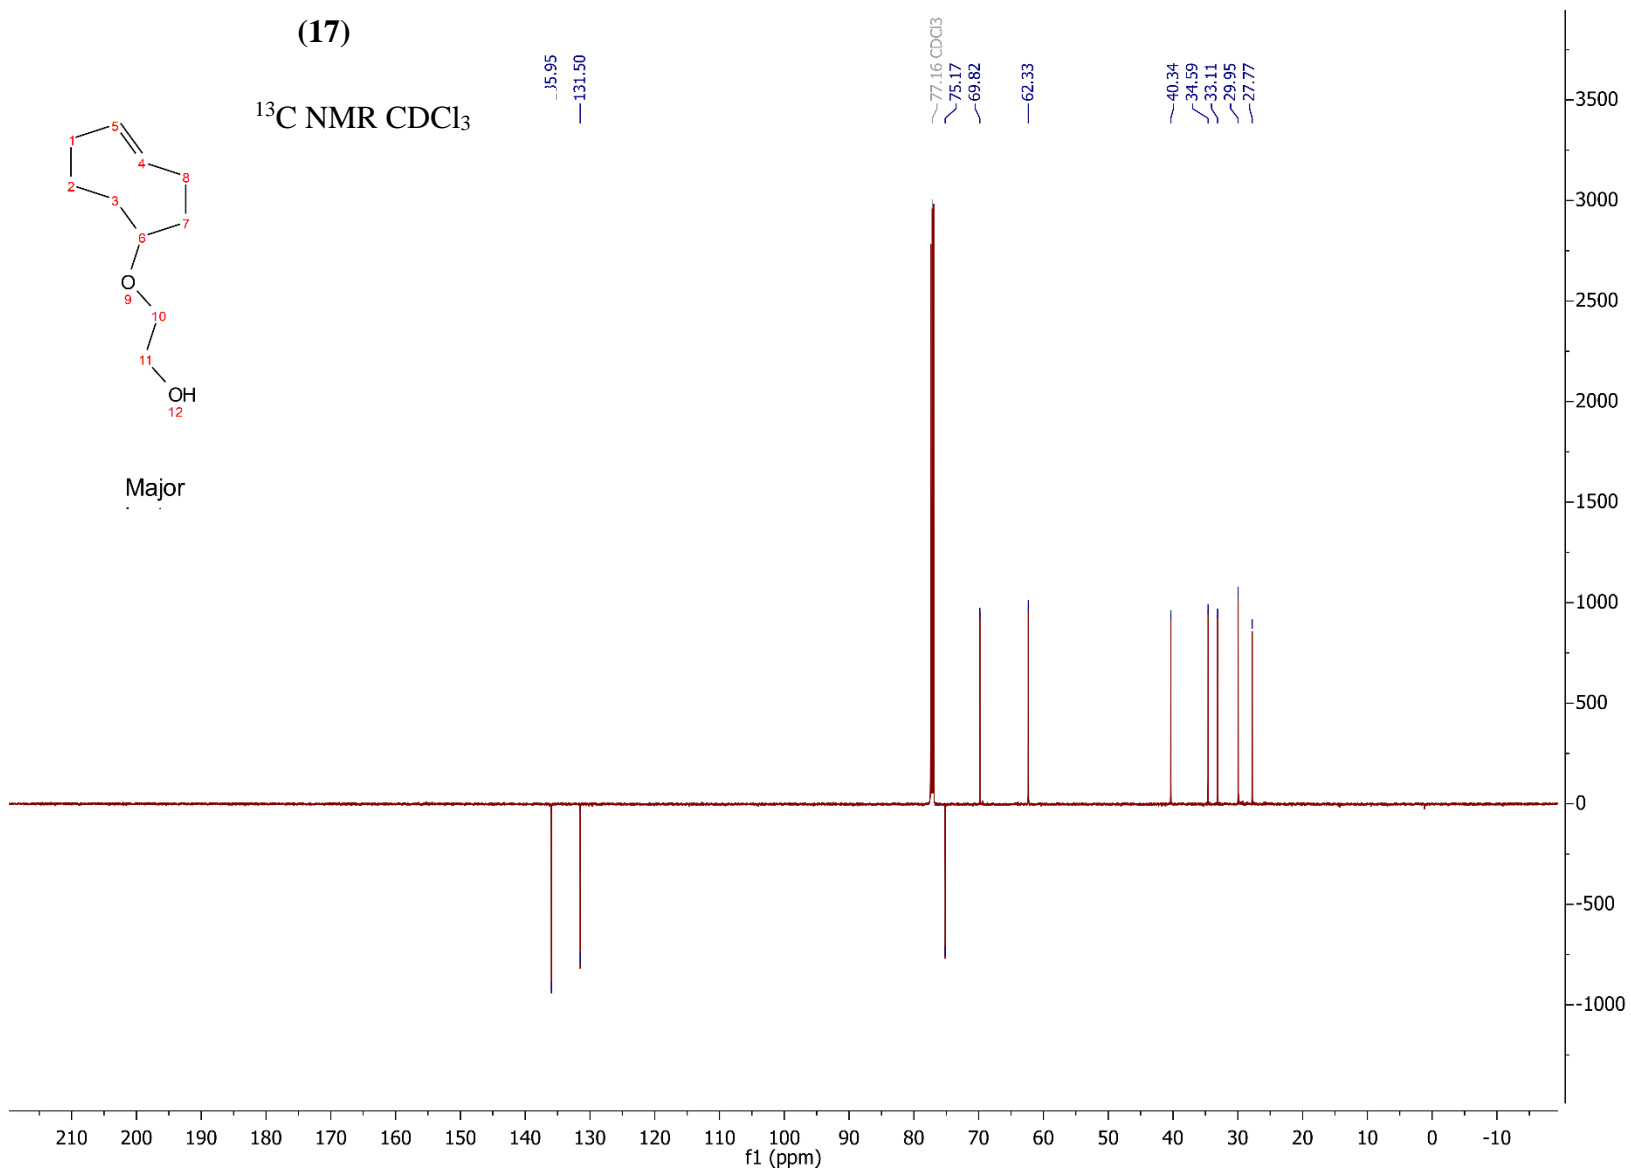

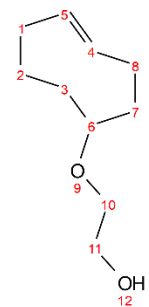

(17)

<sup>1</sup>H NMR CDCl<sub>3</sub>

Minor i

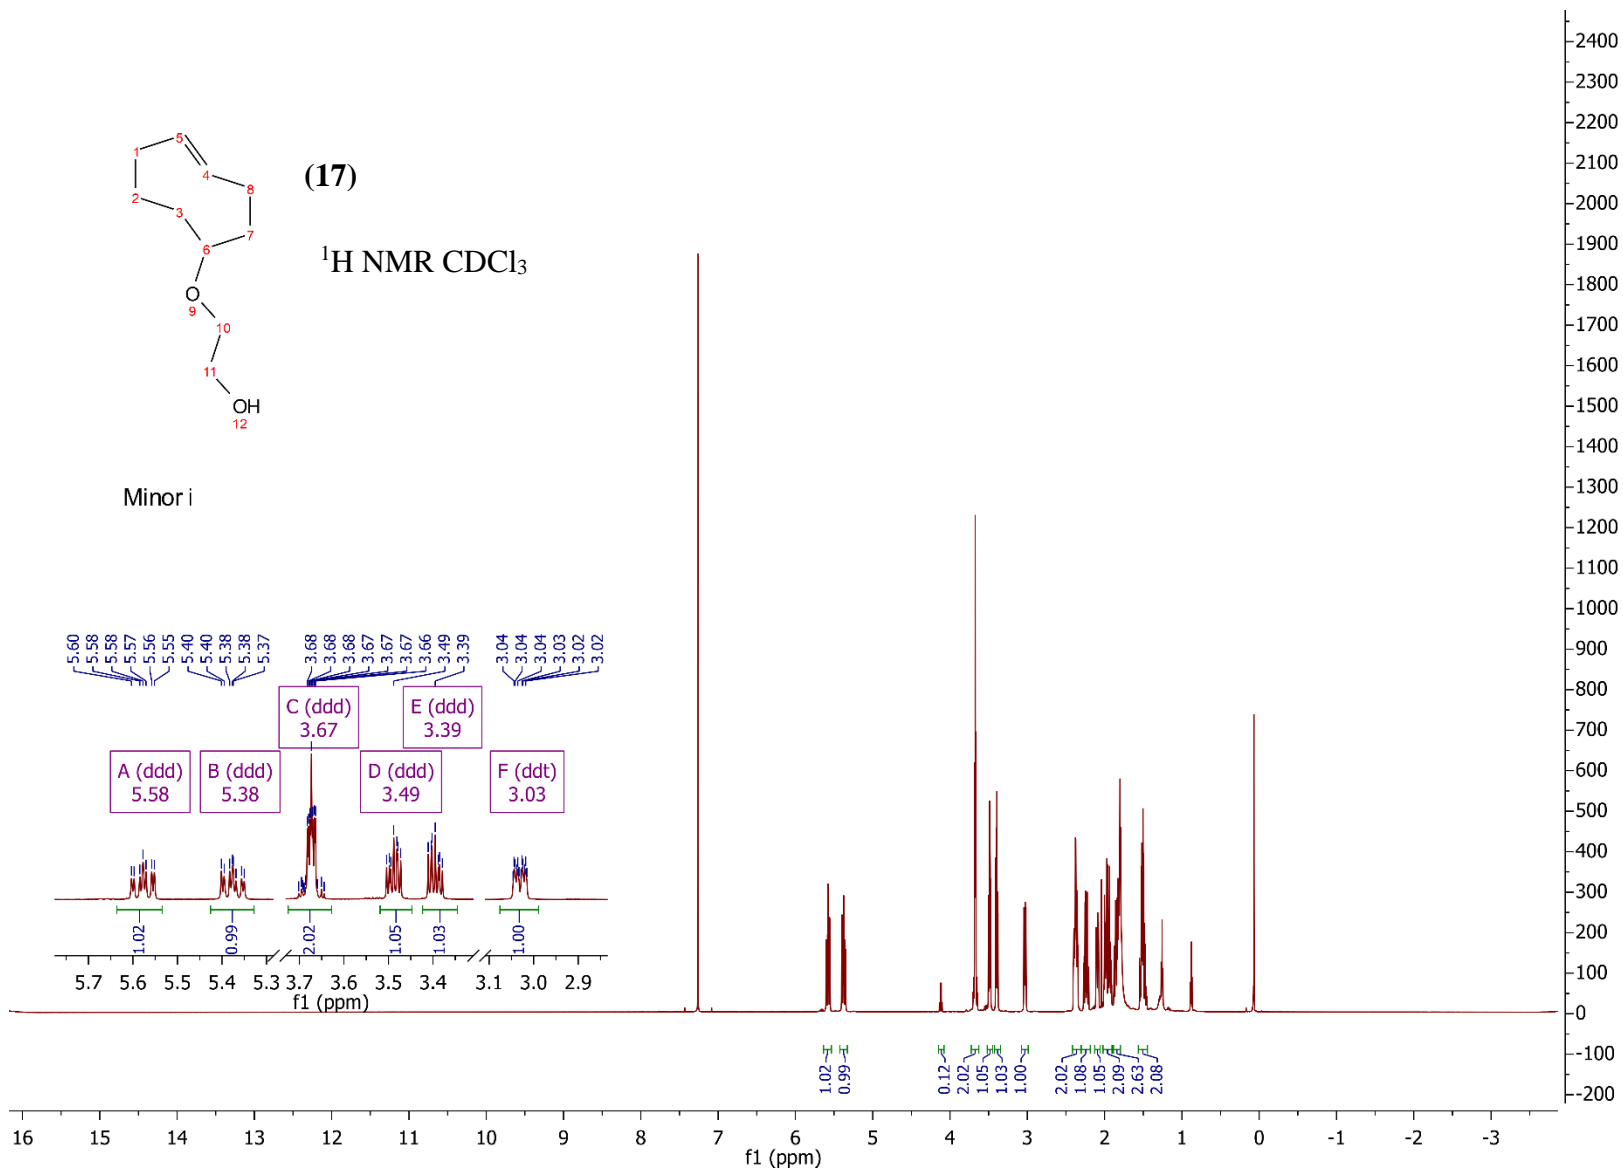

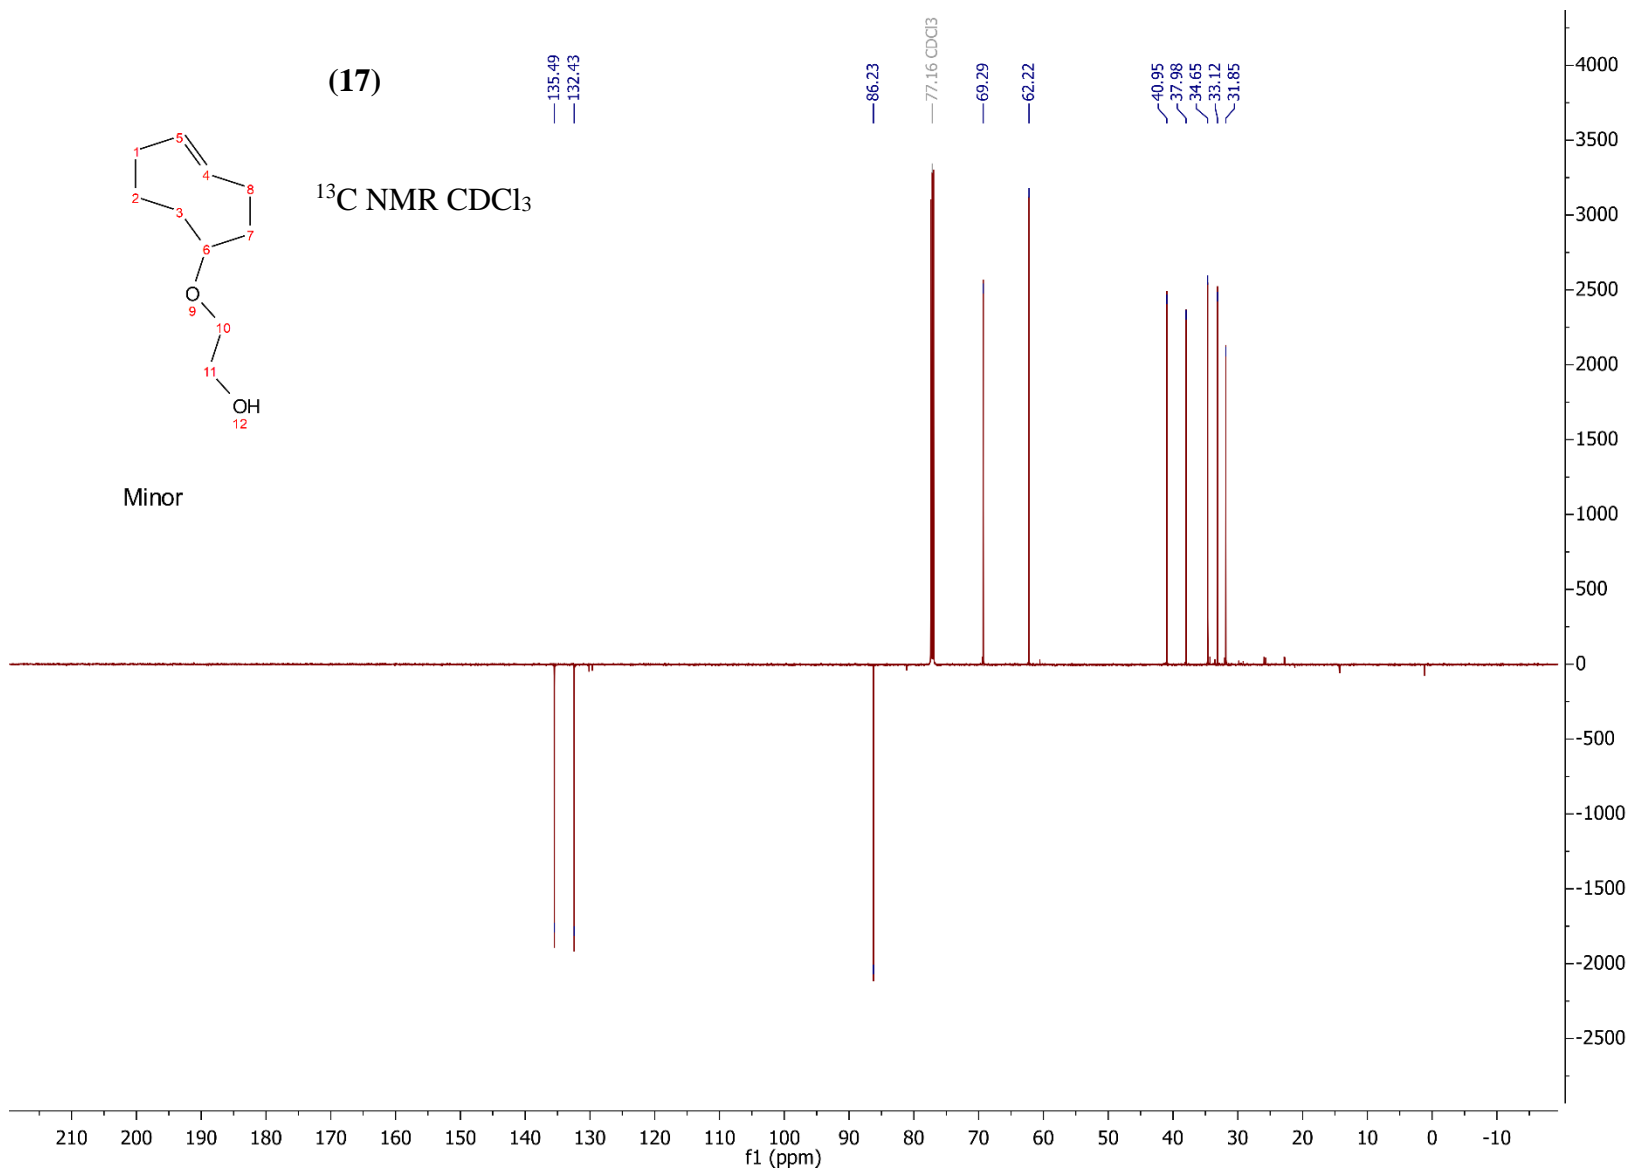

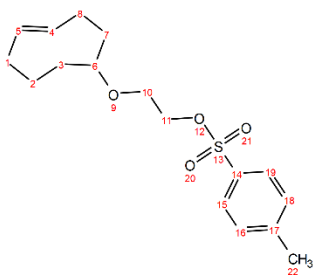

(18)

$^1\text{H}$  NMR  $\text{CDCl}_3$

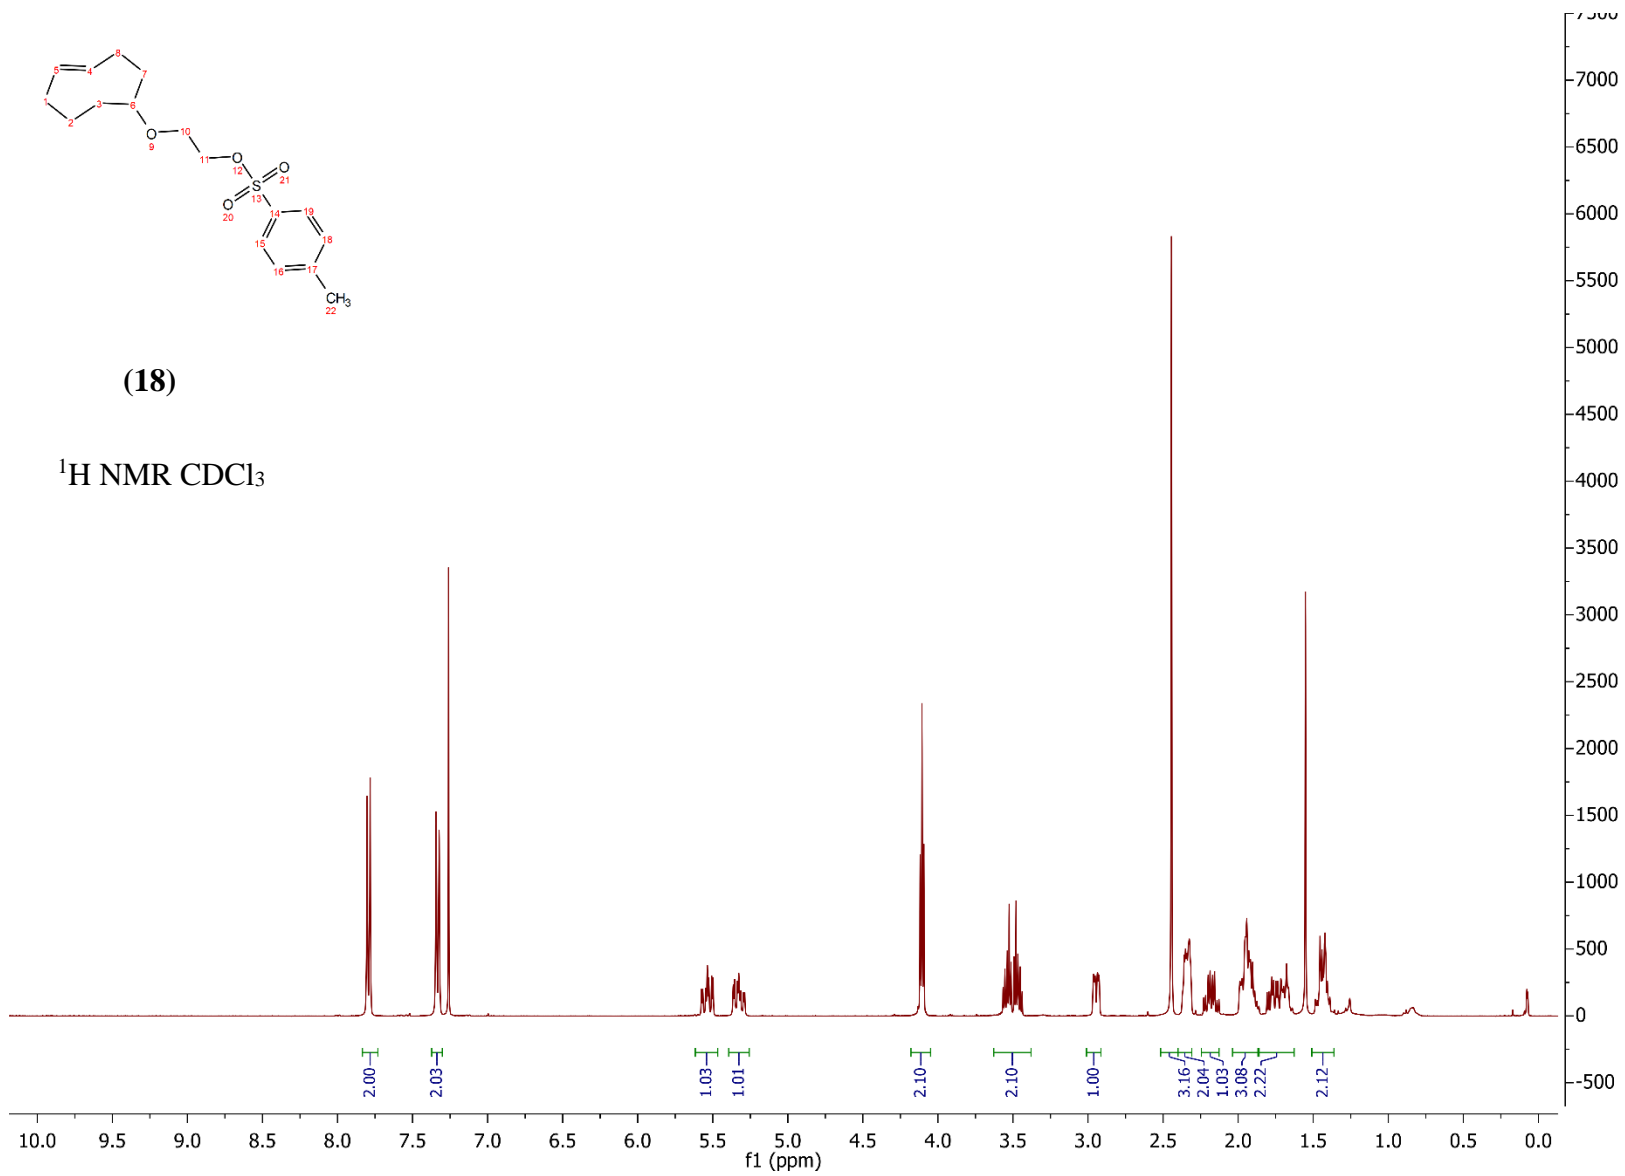





(18)

$^{13}\text{C}$  NMR  $\text{CDCl}_3$

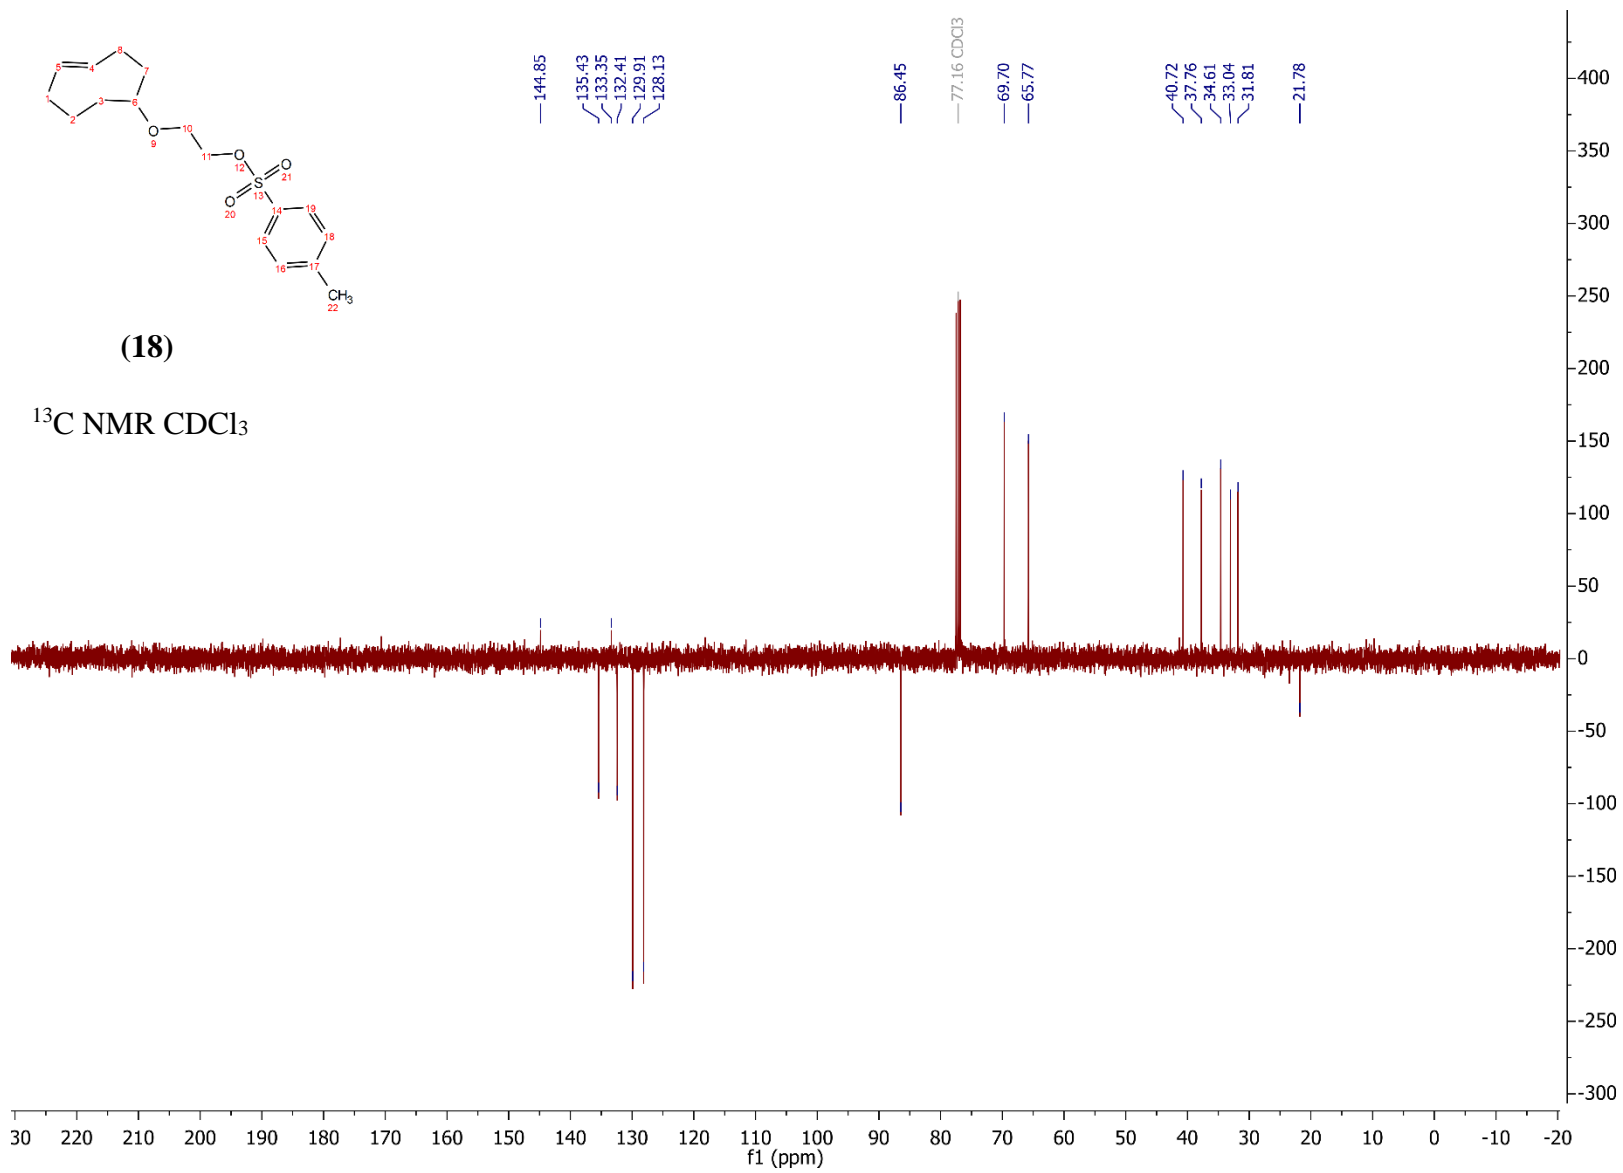

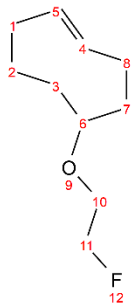

(19)

<sup>1</sup>H NMR CDCl<sub>3</sub>

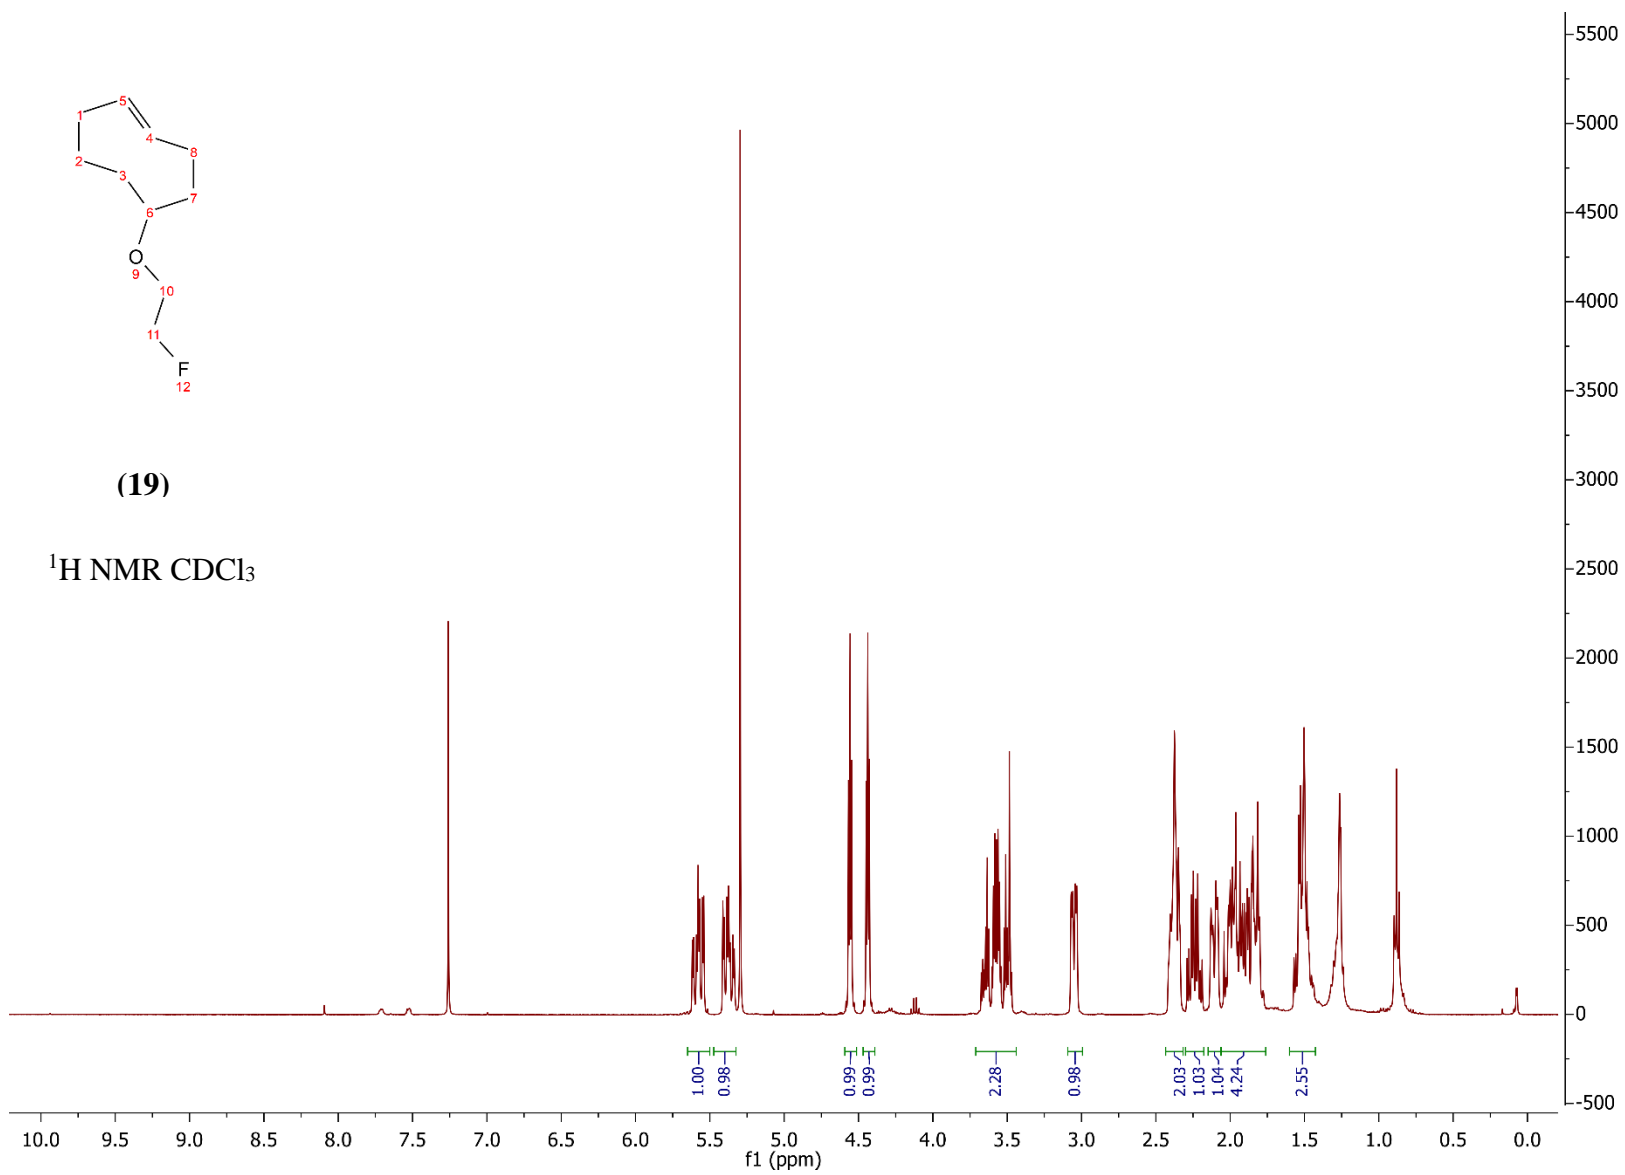

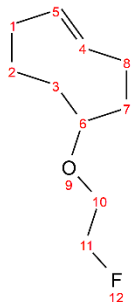

(19)

<sup>13</sup>C NMR CDCl<sub>3</sub>

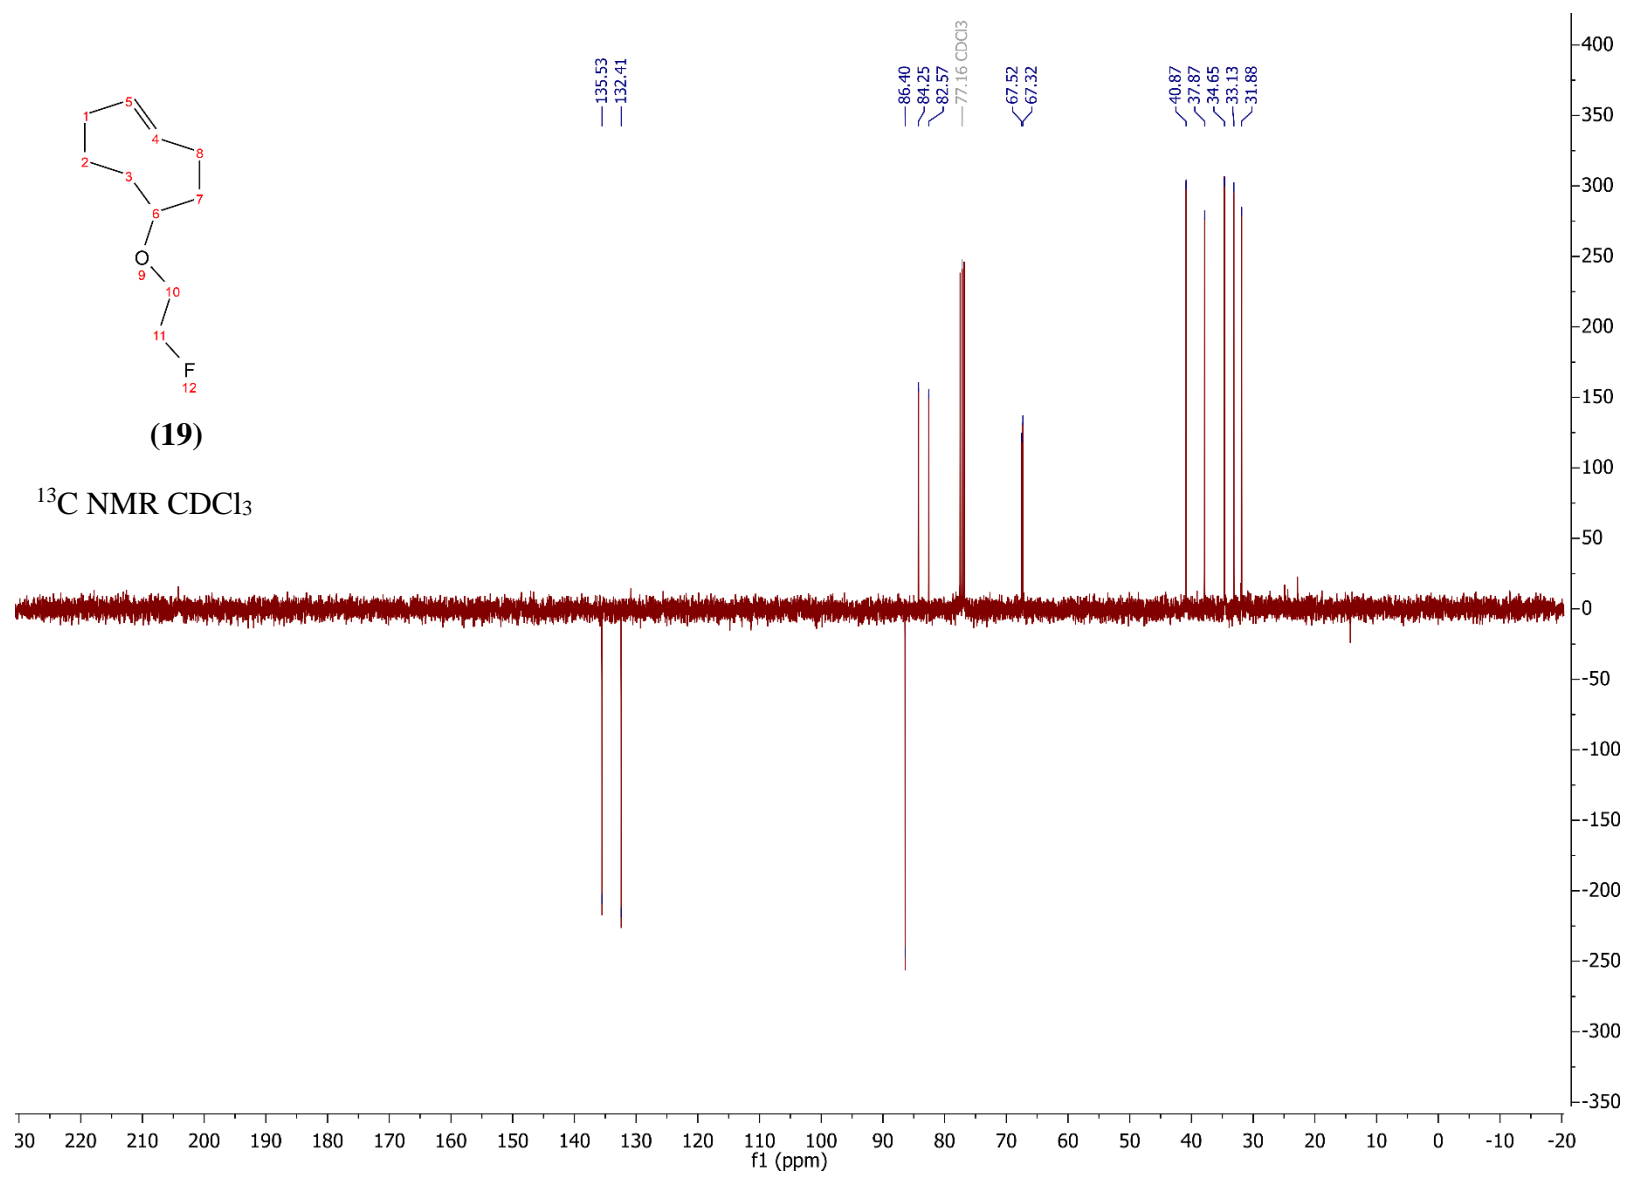

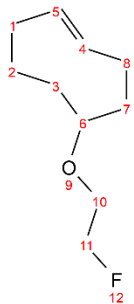

**(19)**

$^{19}\text{F}$  NMR  $\text{CDCl}_3$

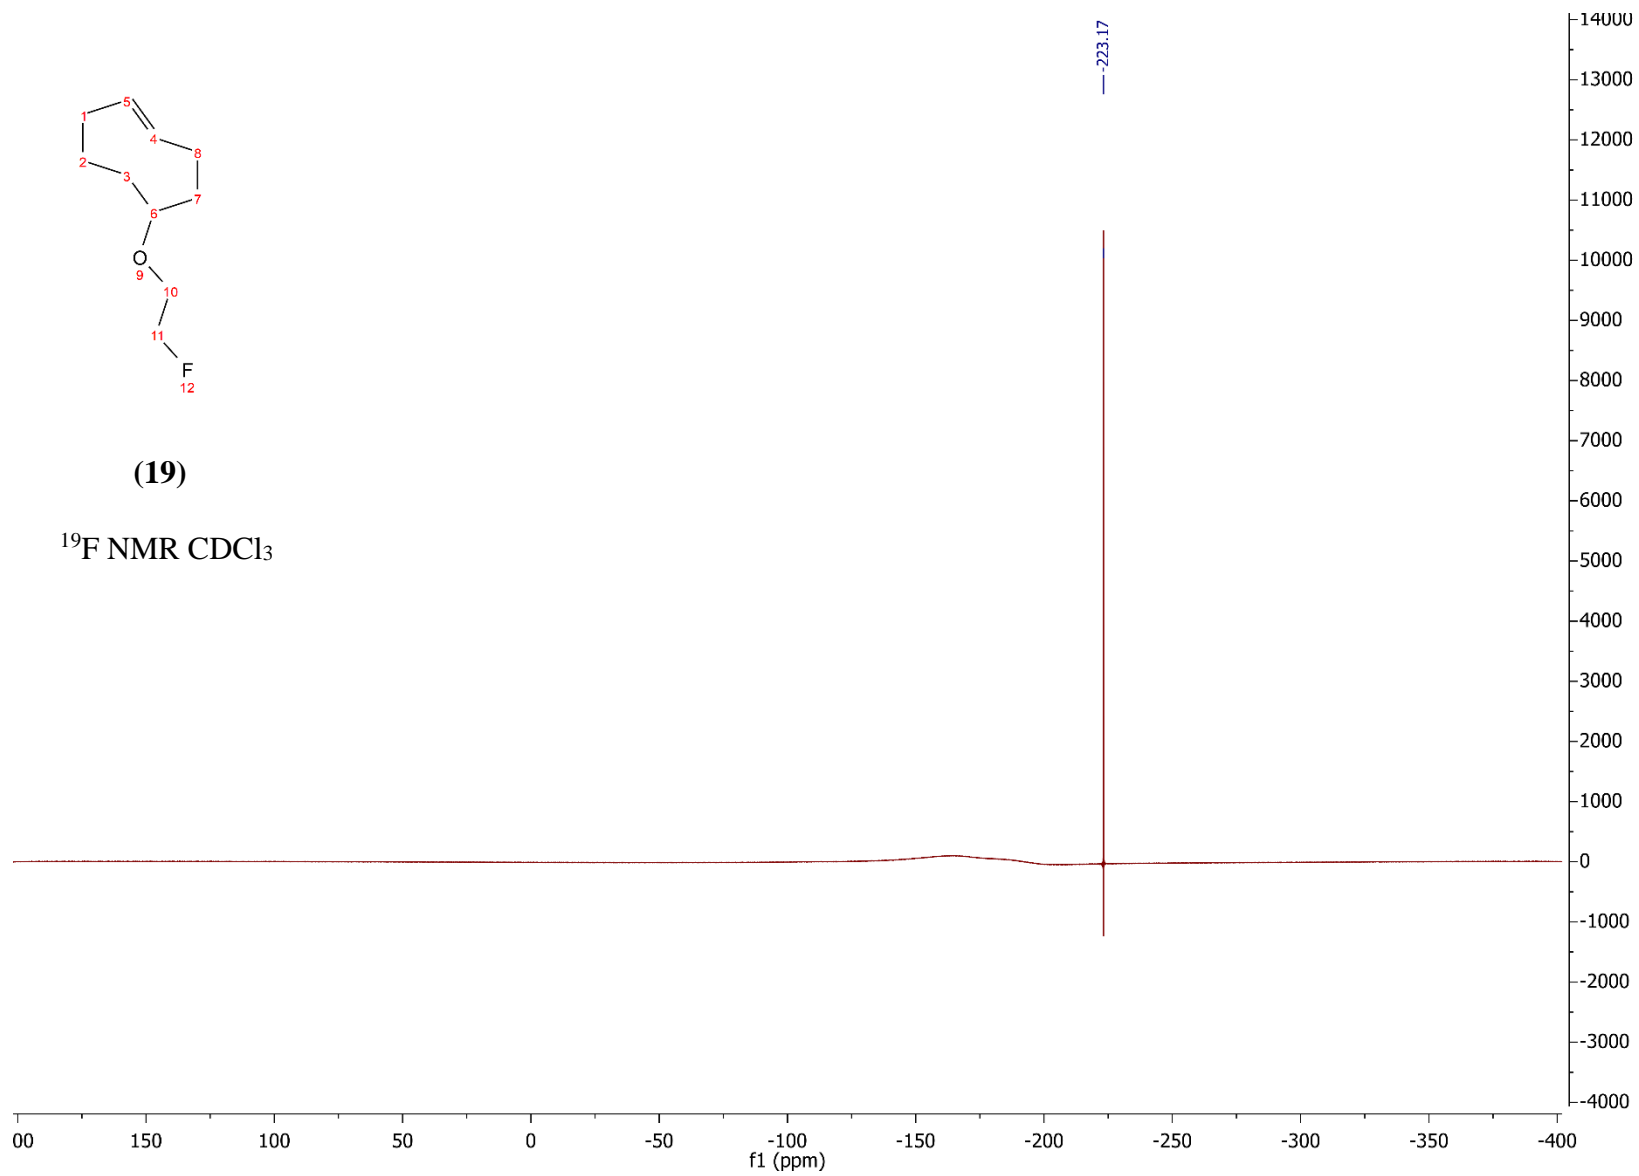

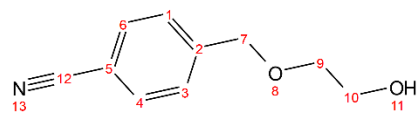

(21)

$^1\text{H NMR CDCl}_3$

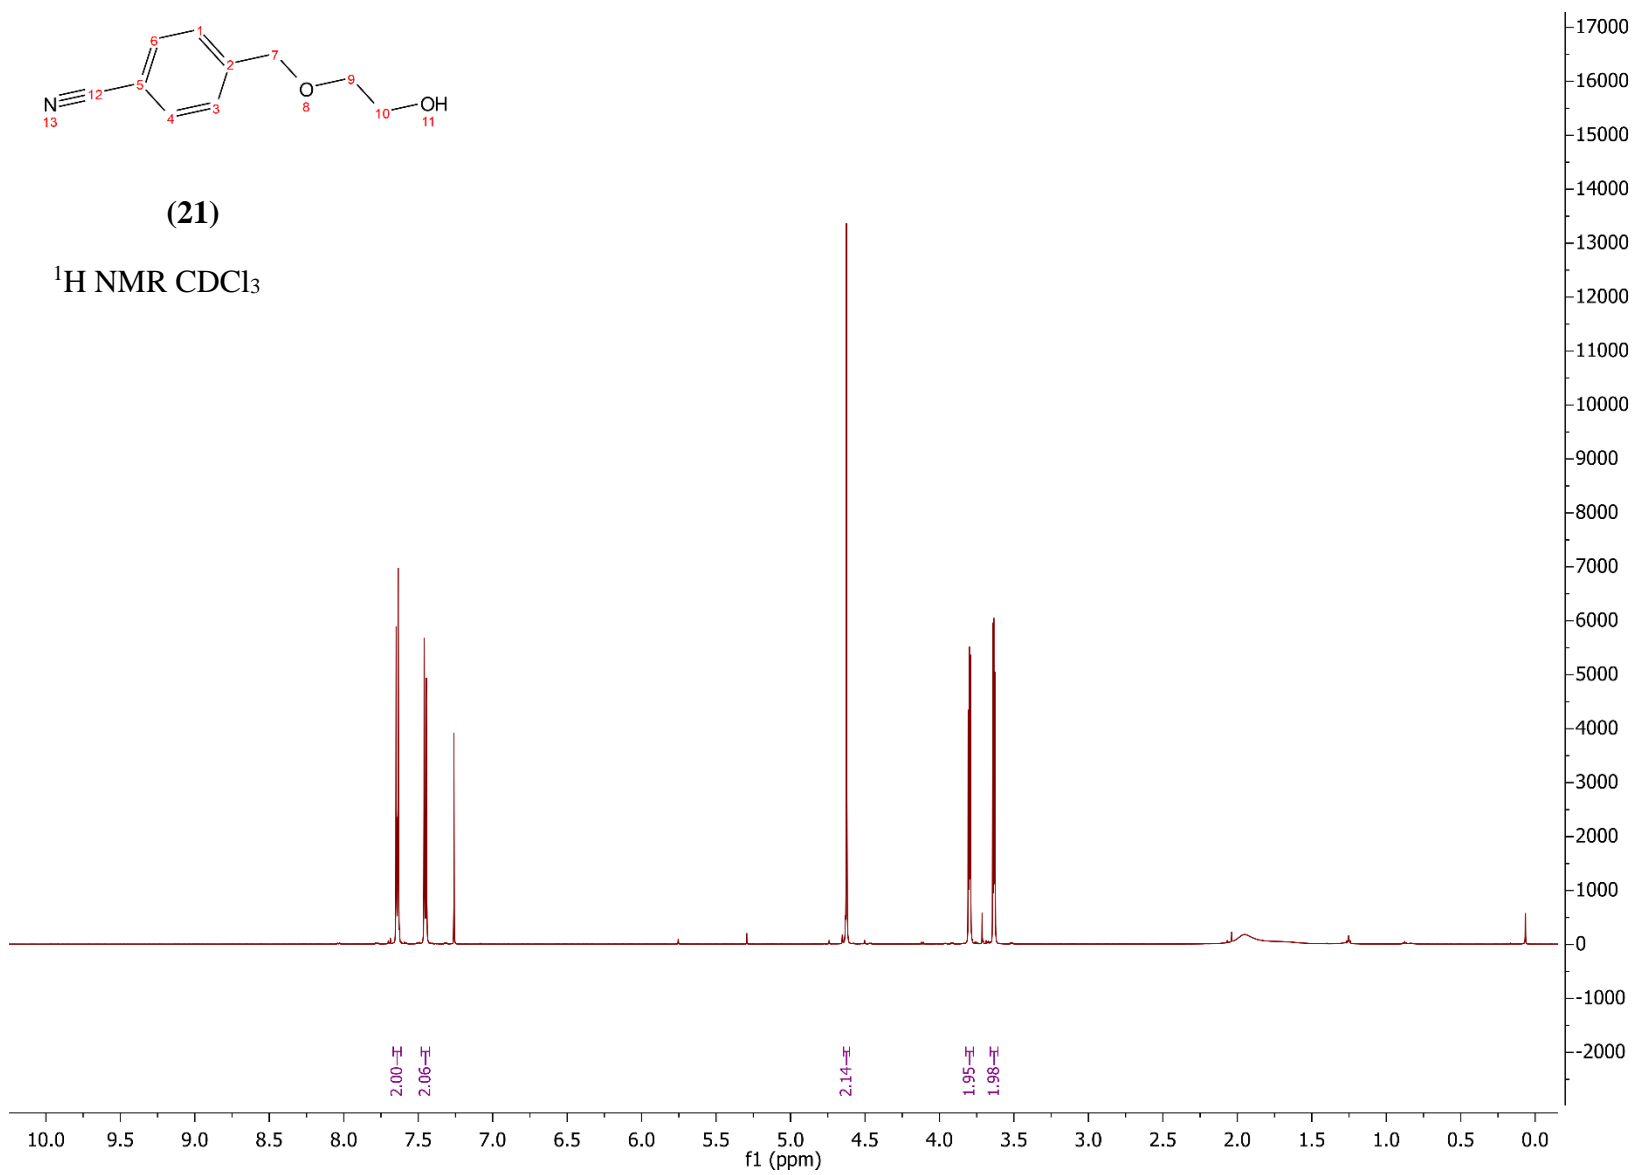

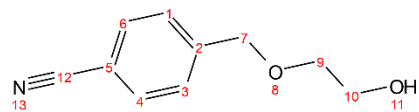

(21)

<sup>13</sup>C NMR CDCl<sub>3</sub>

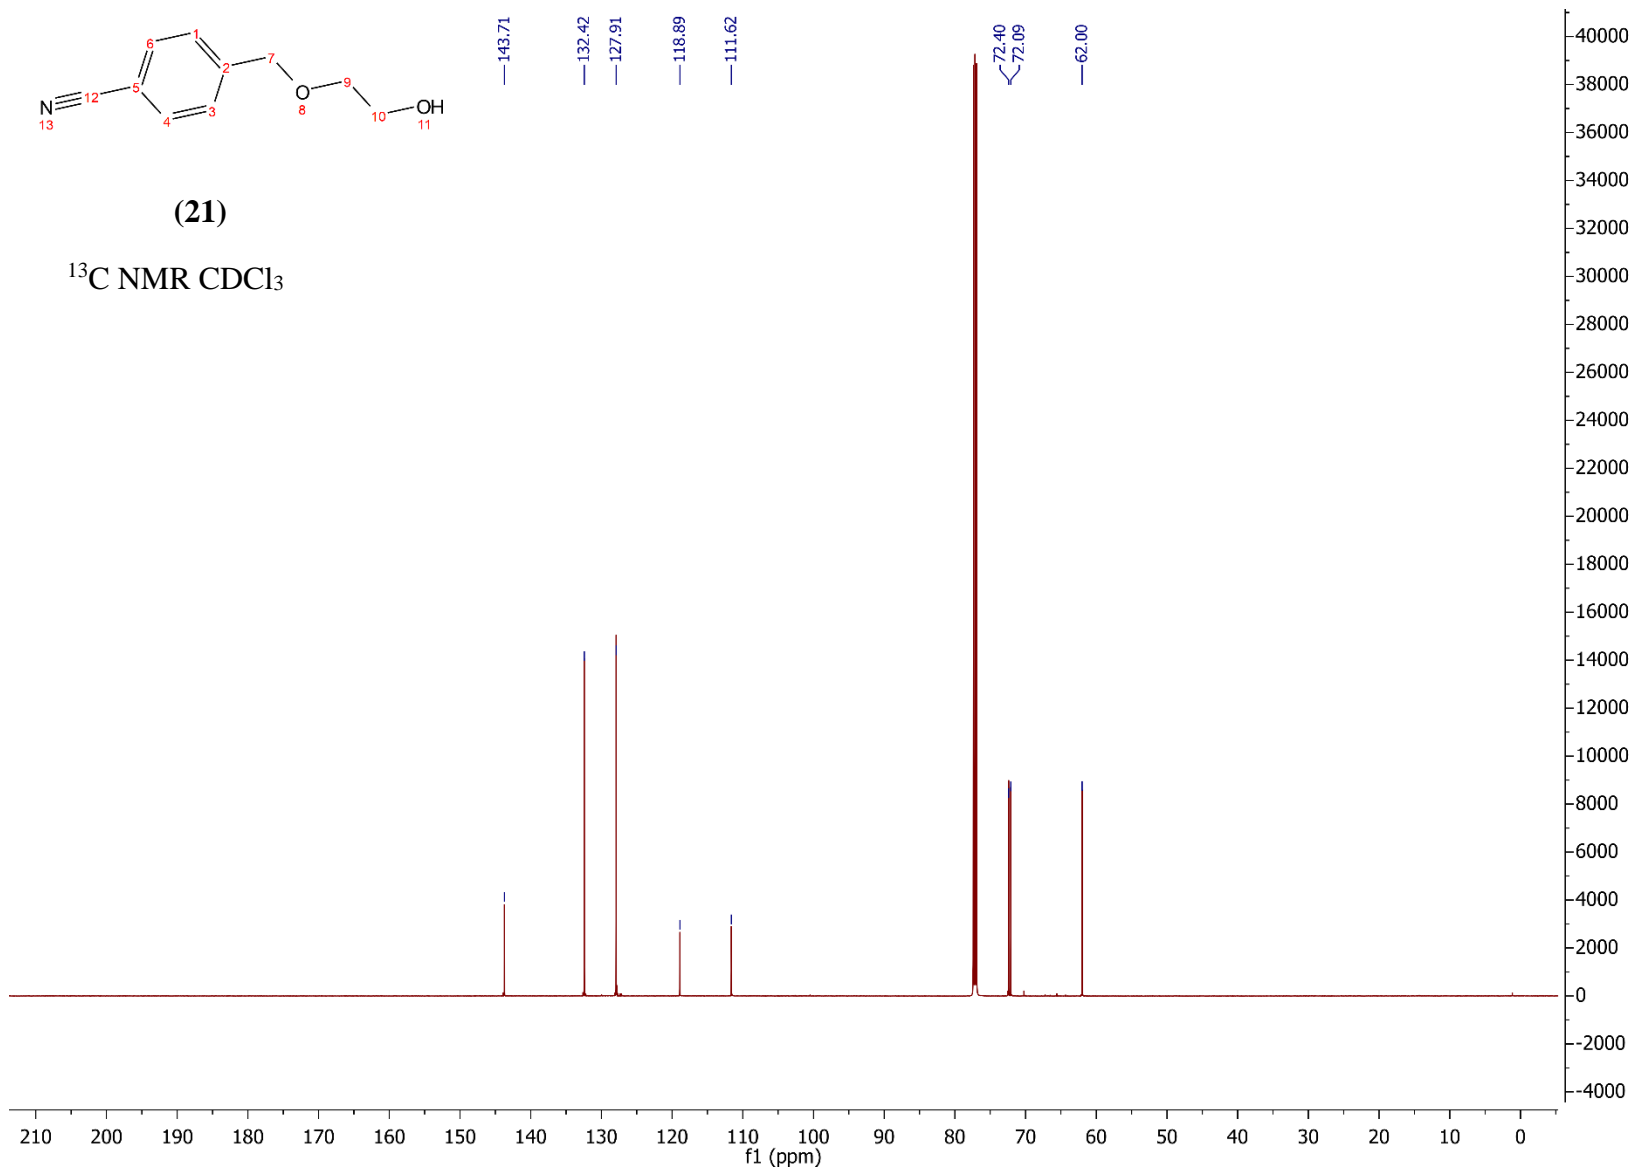

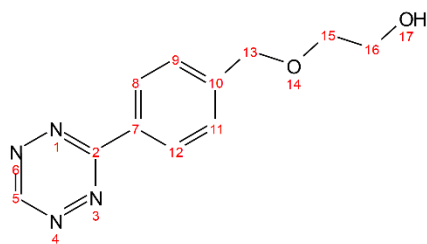

(22)

<sup>1</sup>H NMR CDCl<sub>3</sub>

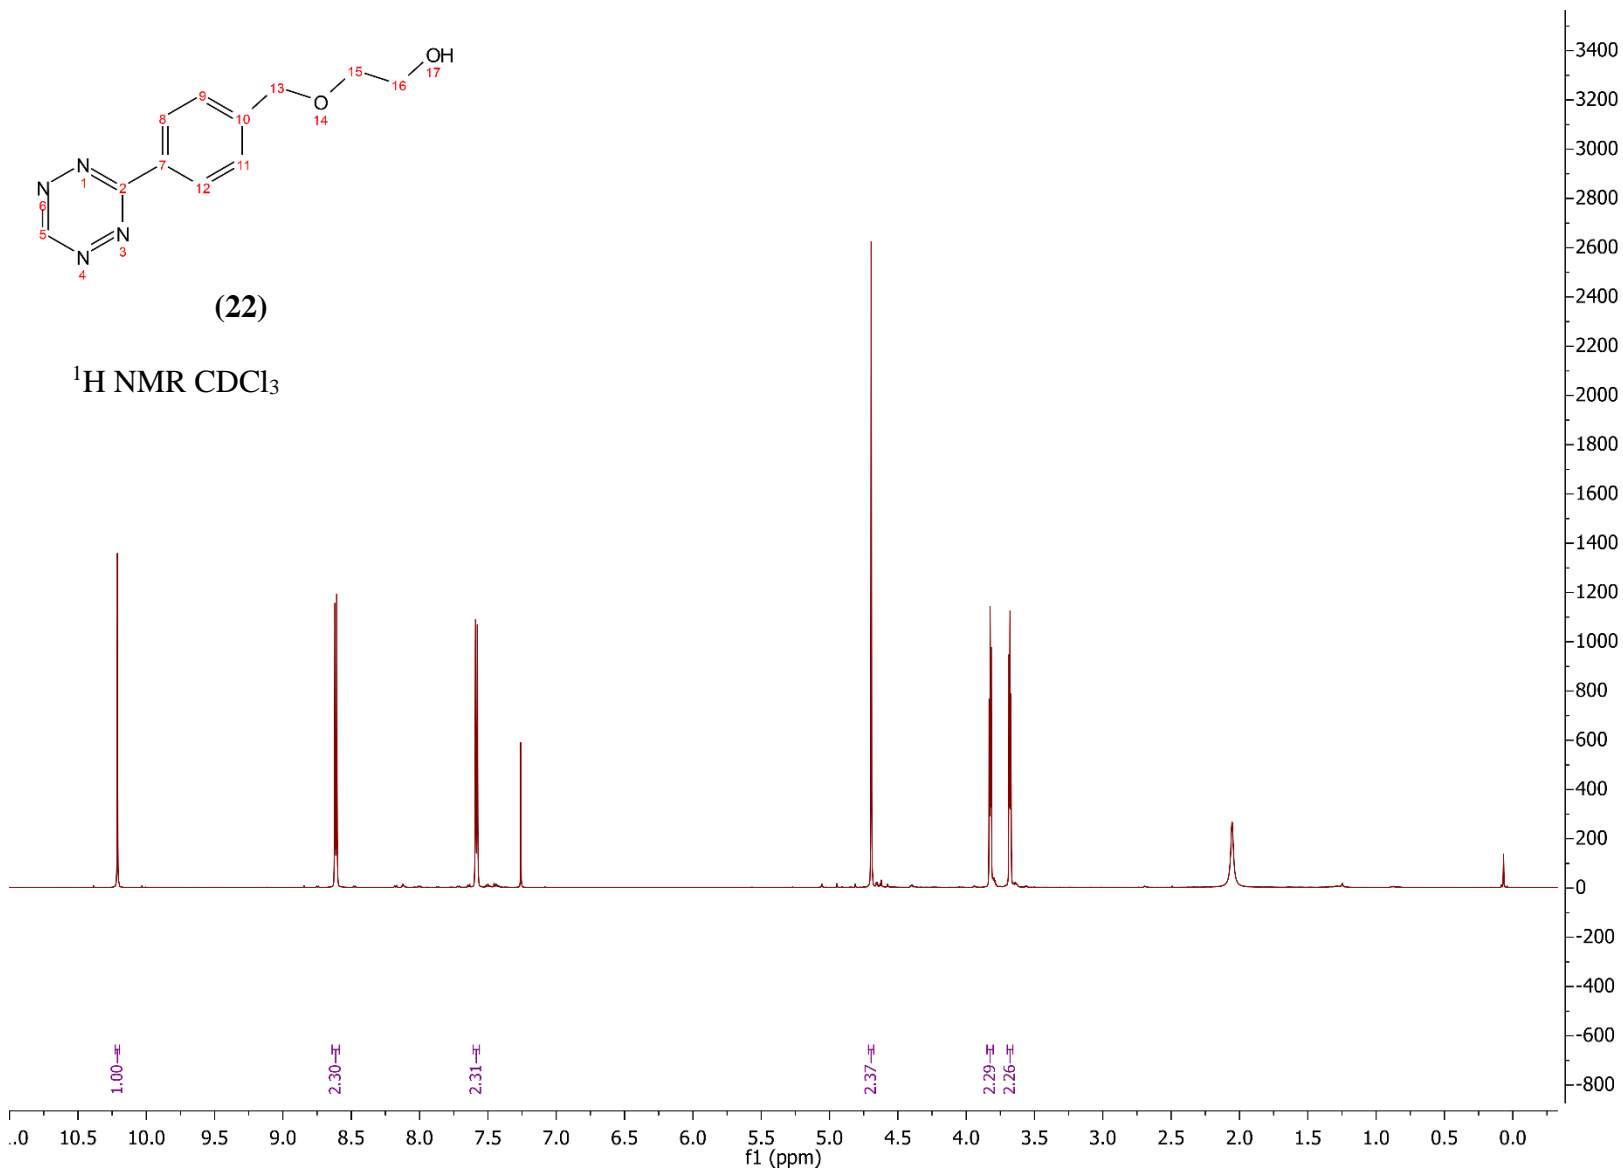

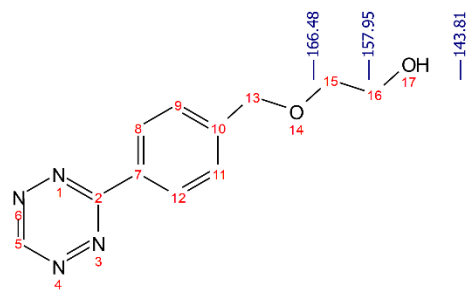

(22)

$^{13}\text{C}$  NMR  $\text{CDCl}_3$

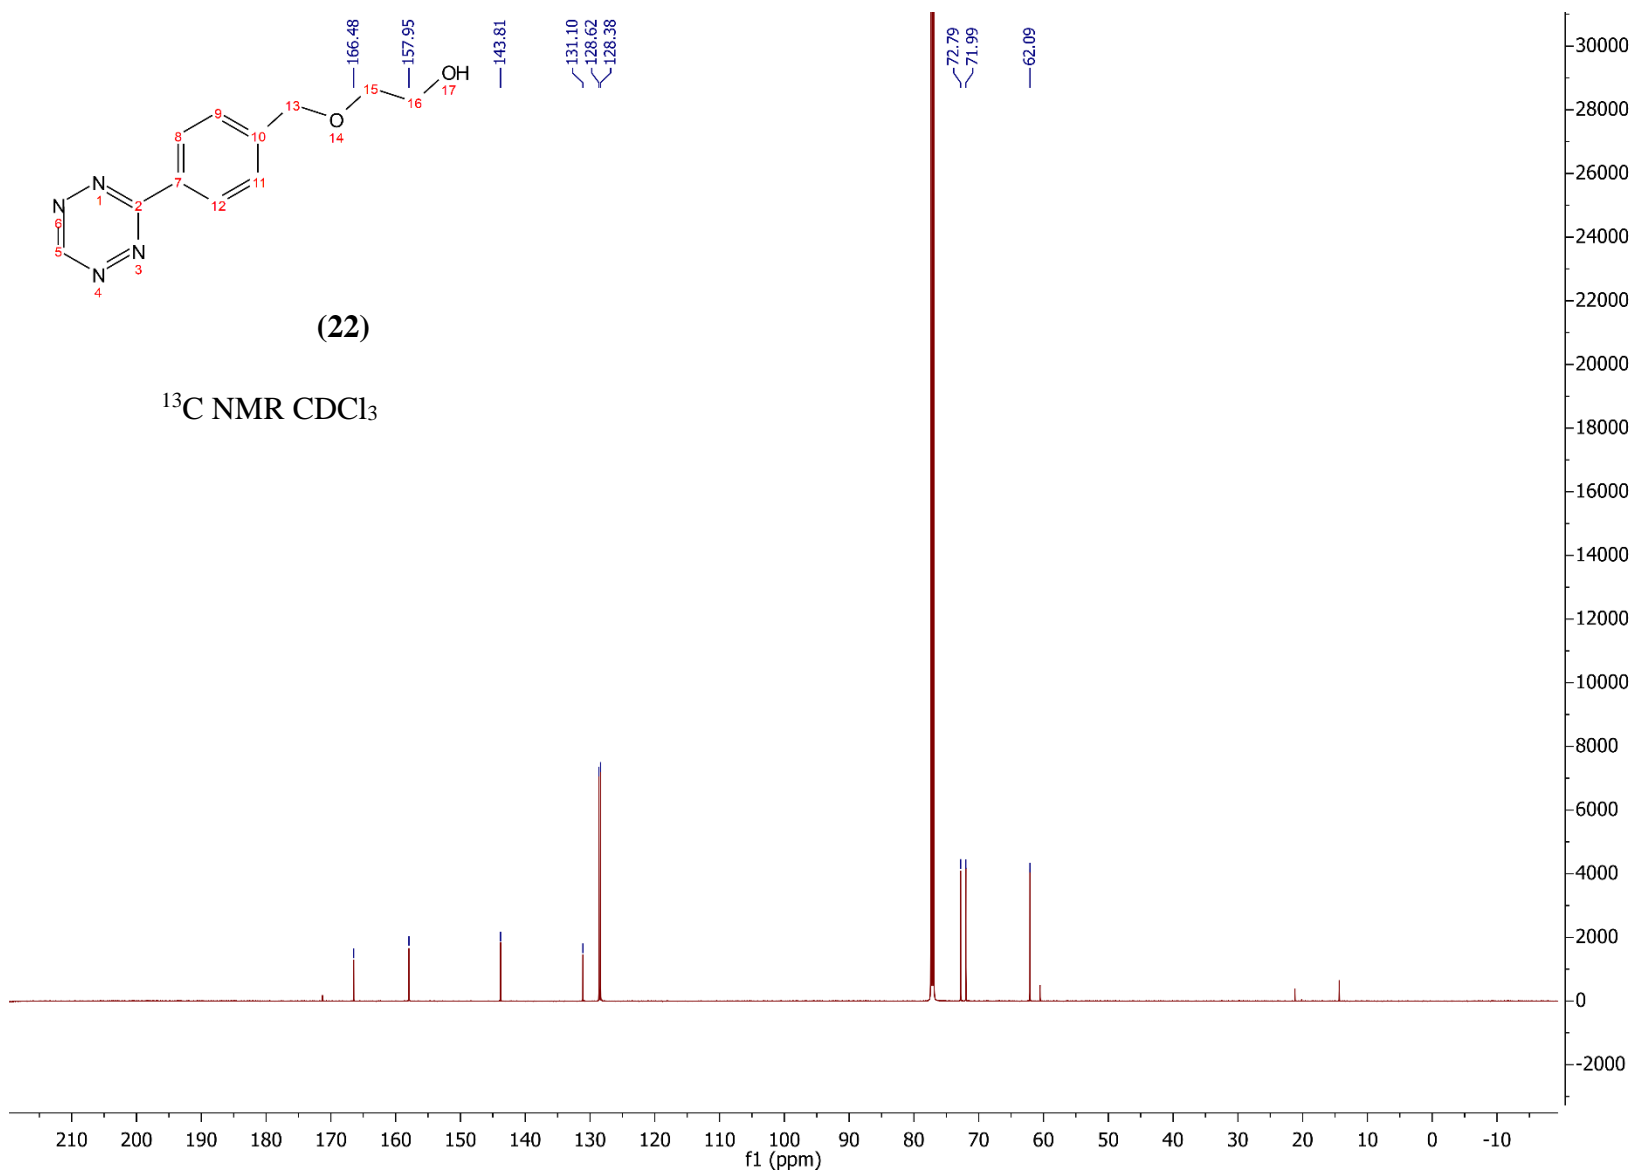



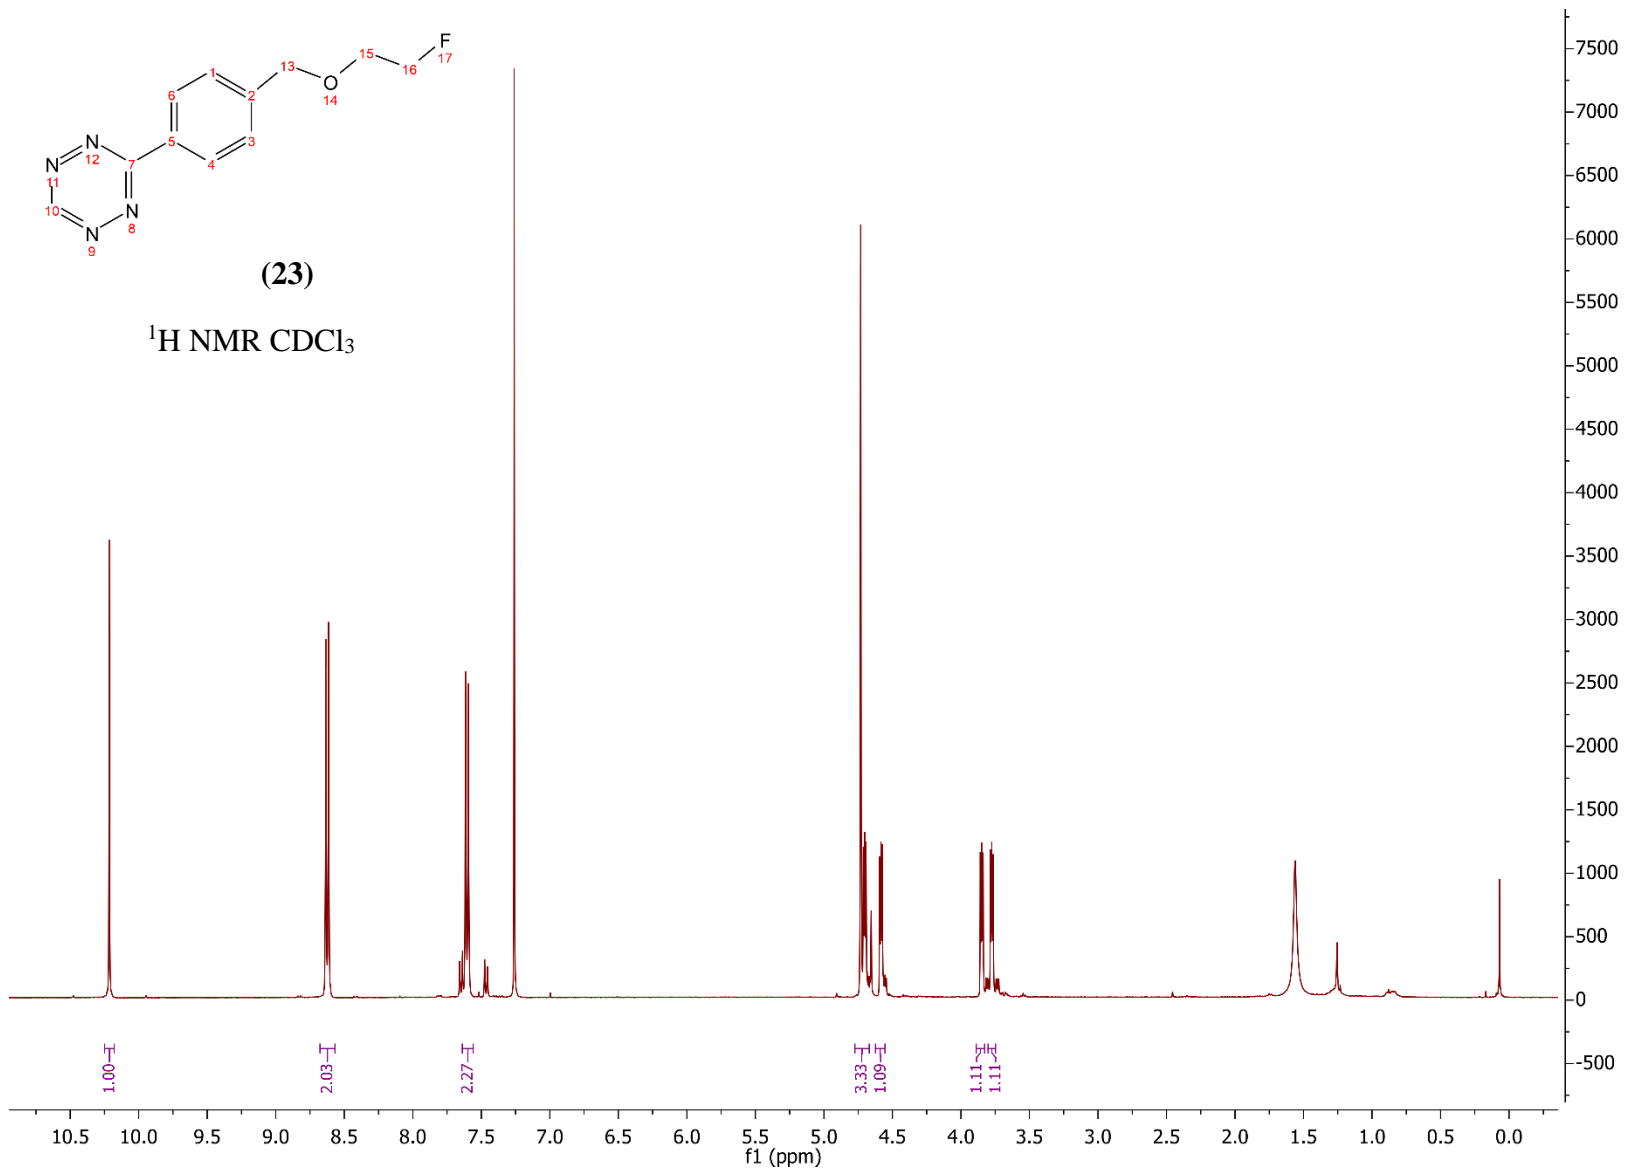

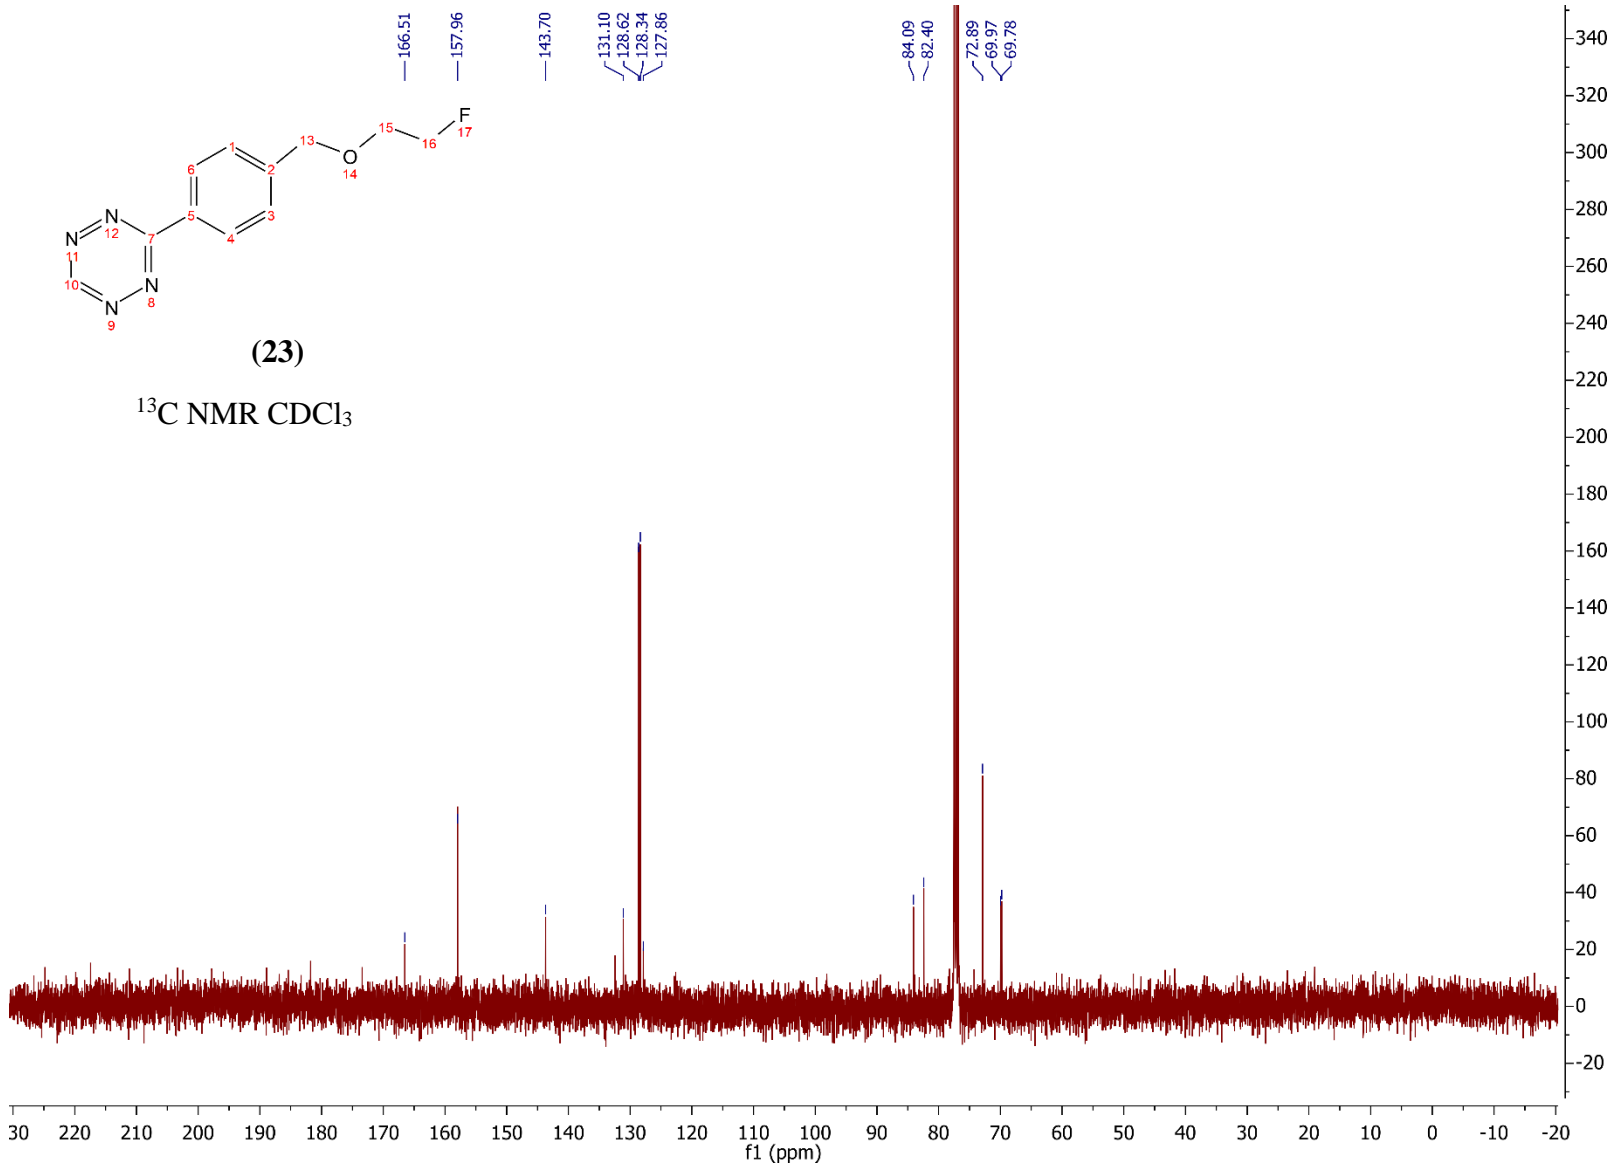

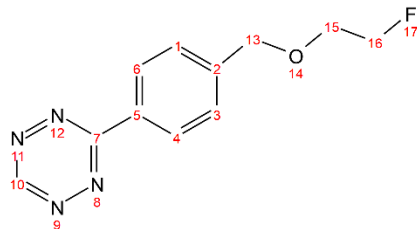

(23)

$^{19}\text{F}$  NMR  $\text{CDCl}_3$

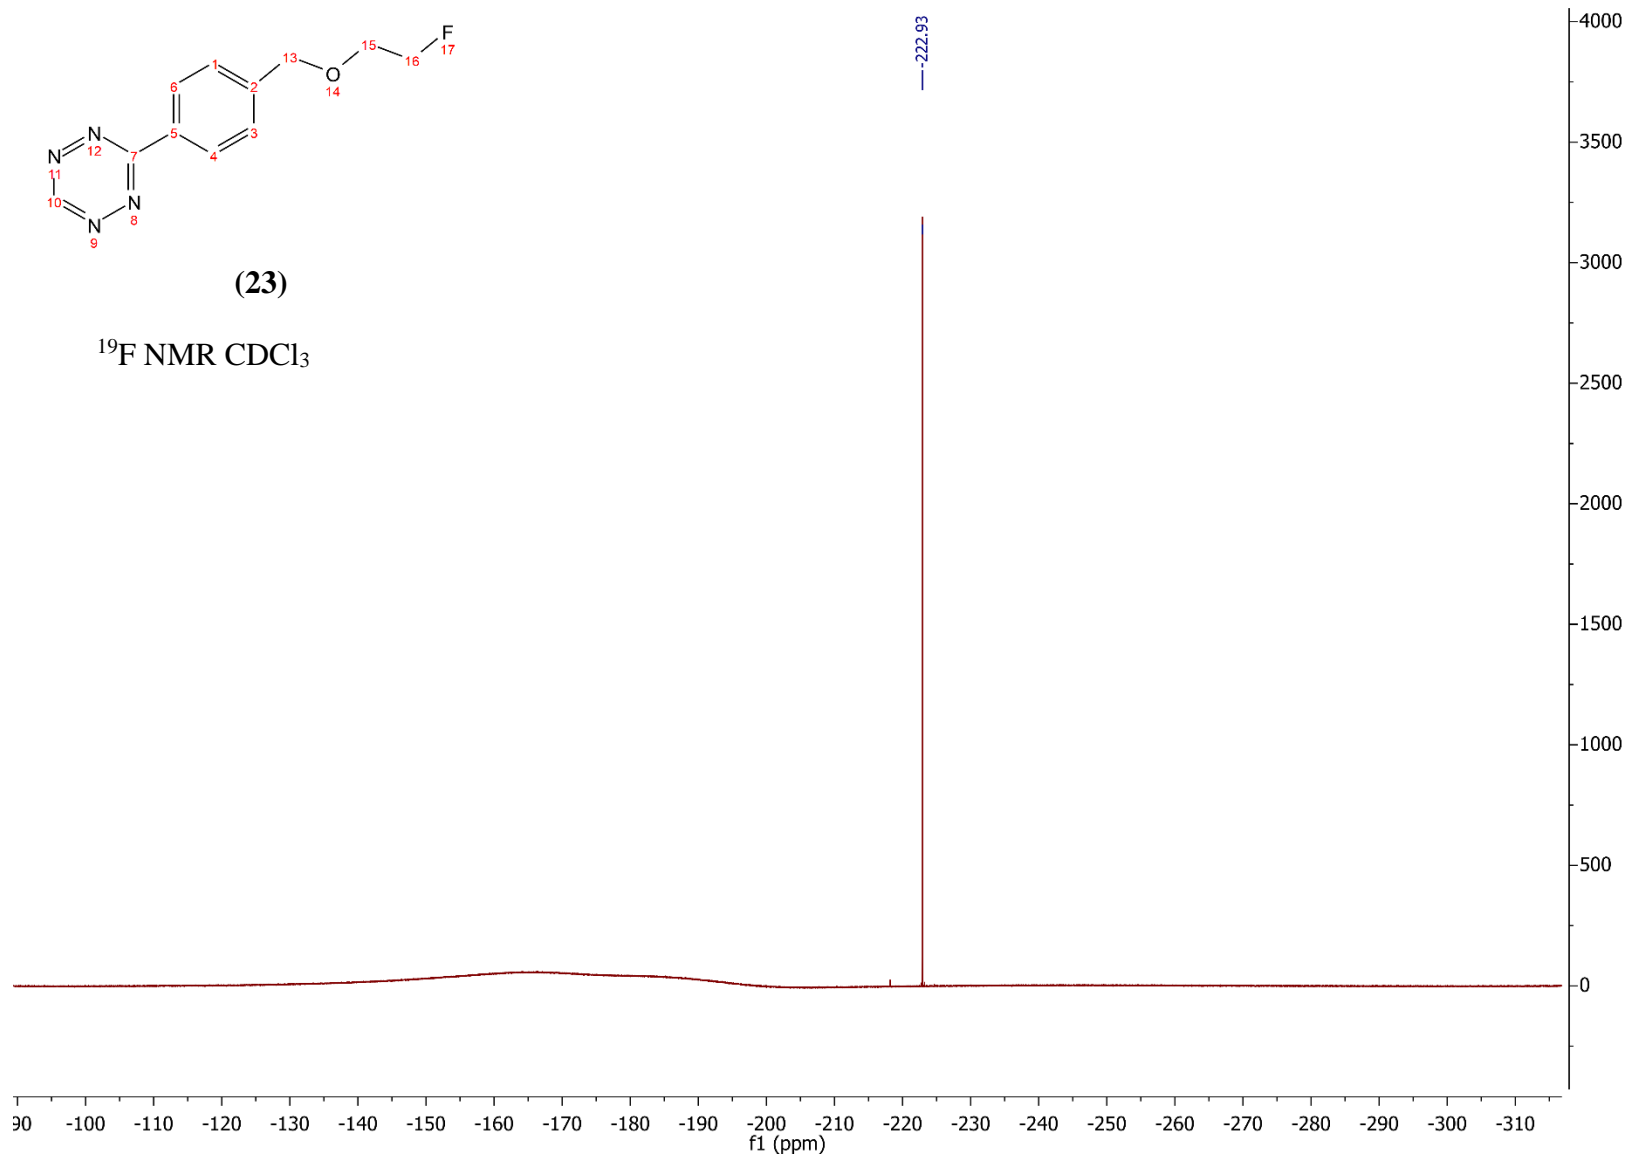

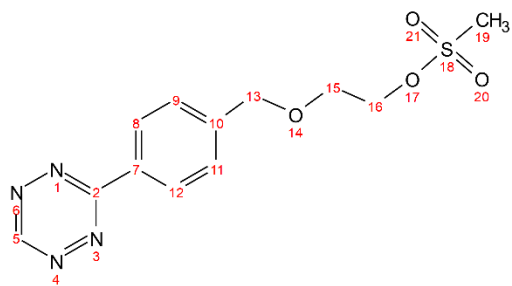

(24)

$^1\text{H NMR CDCl}_3$

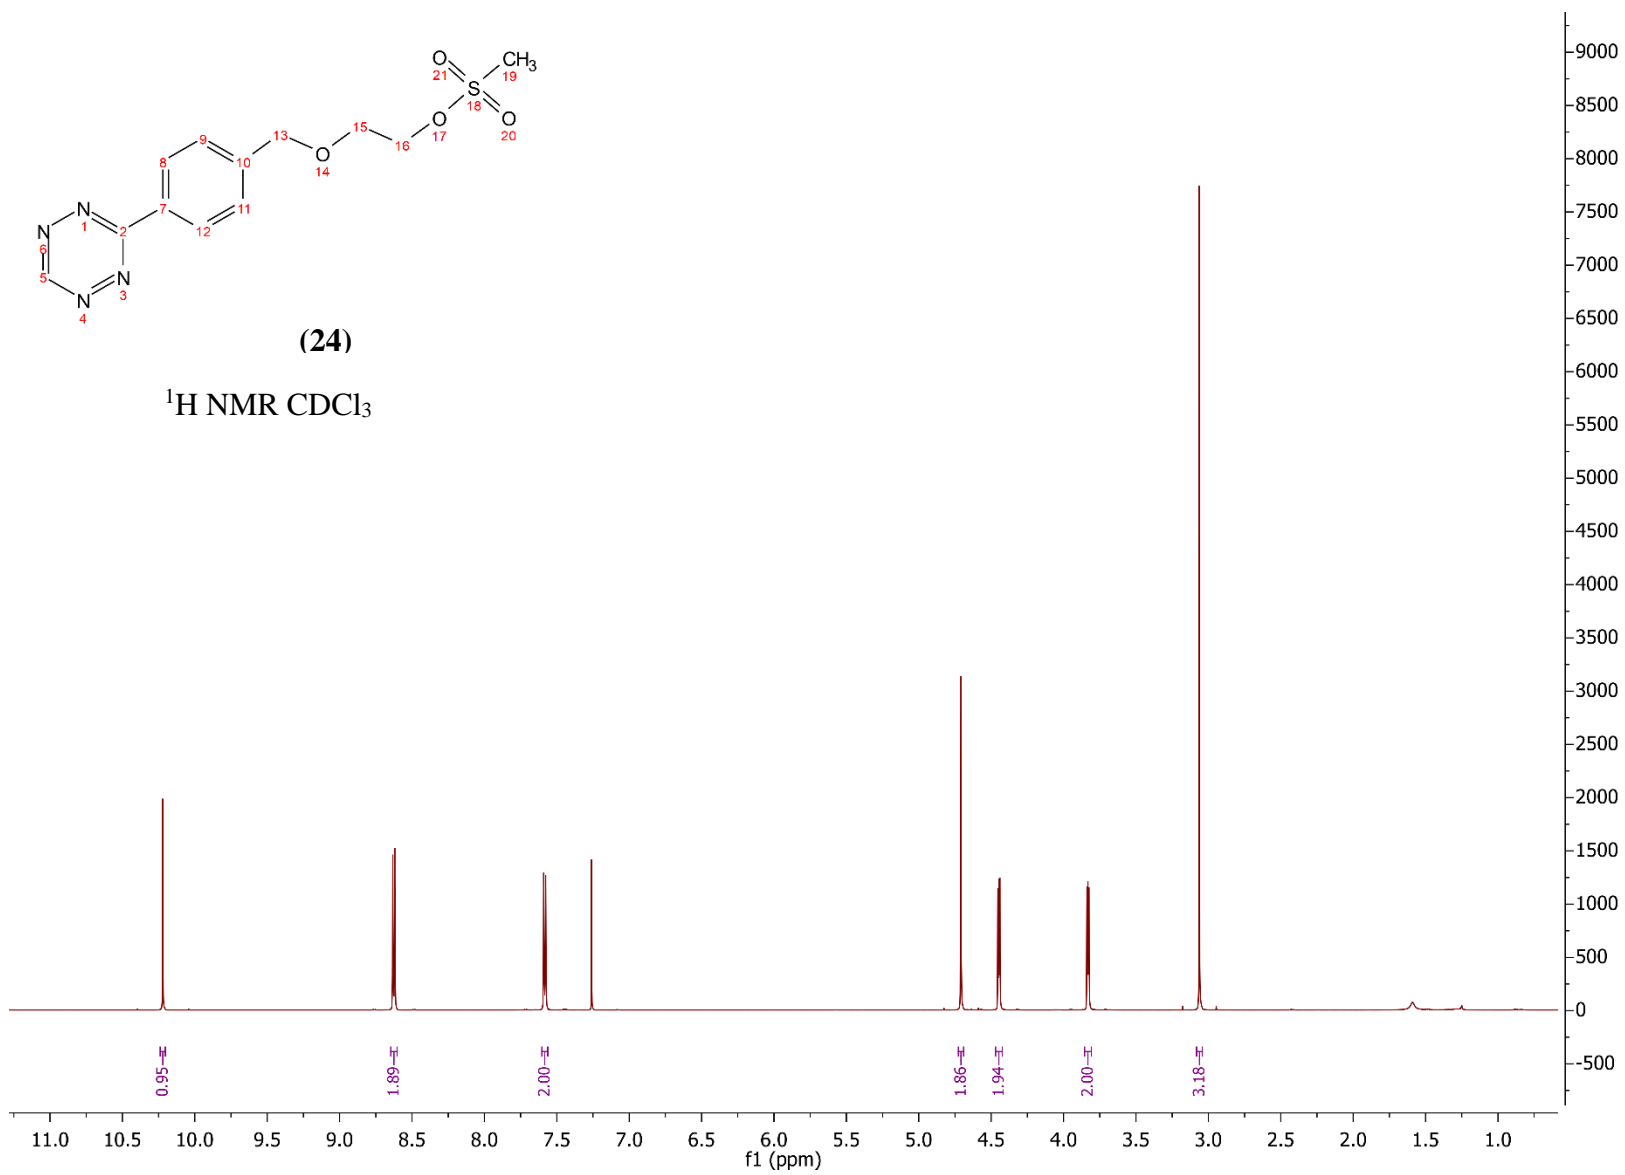

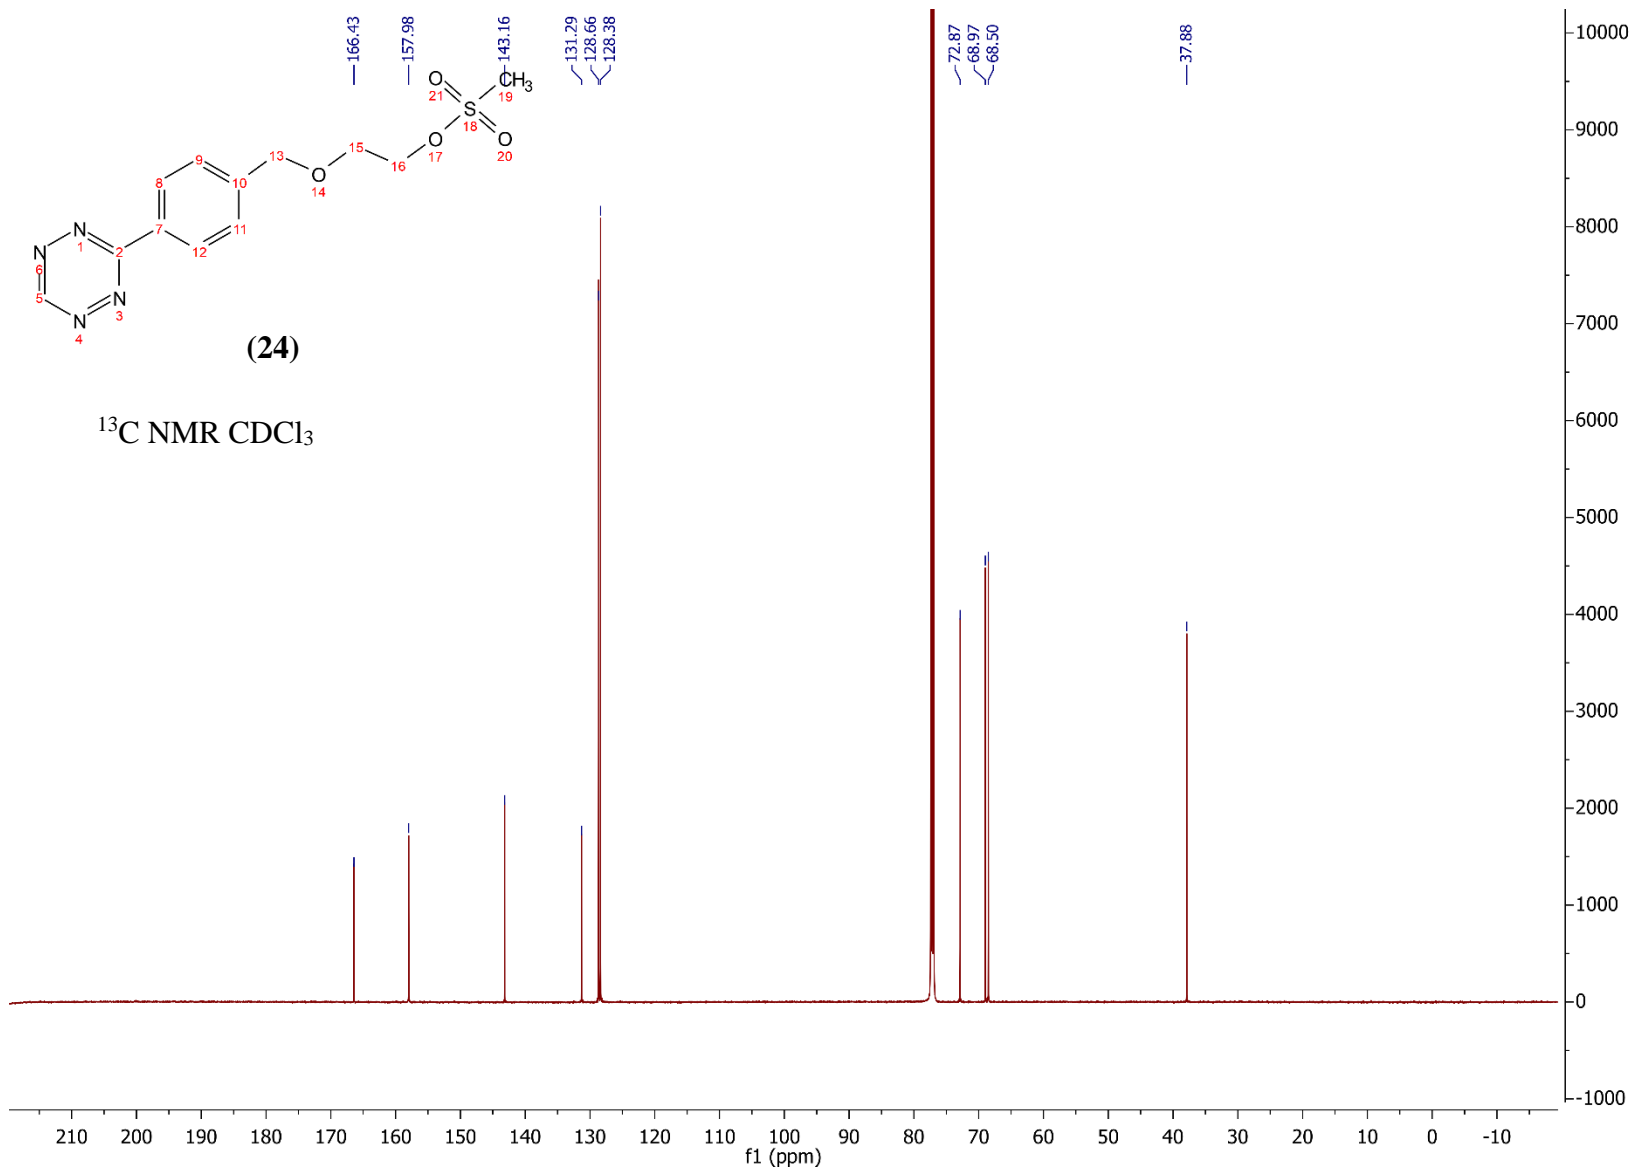

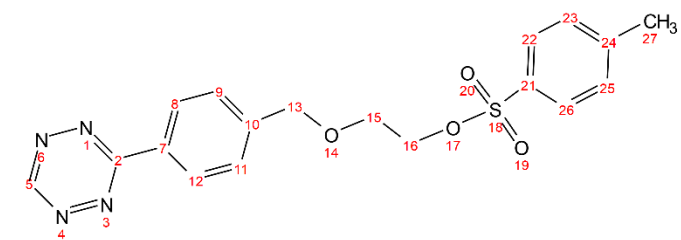

(25)

$^1\text{H NMR CDCl}_3$

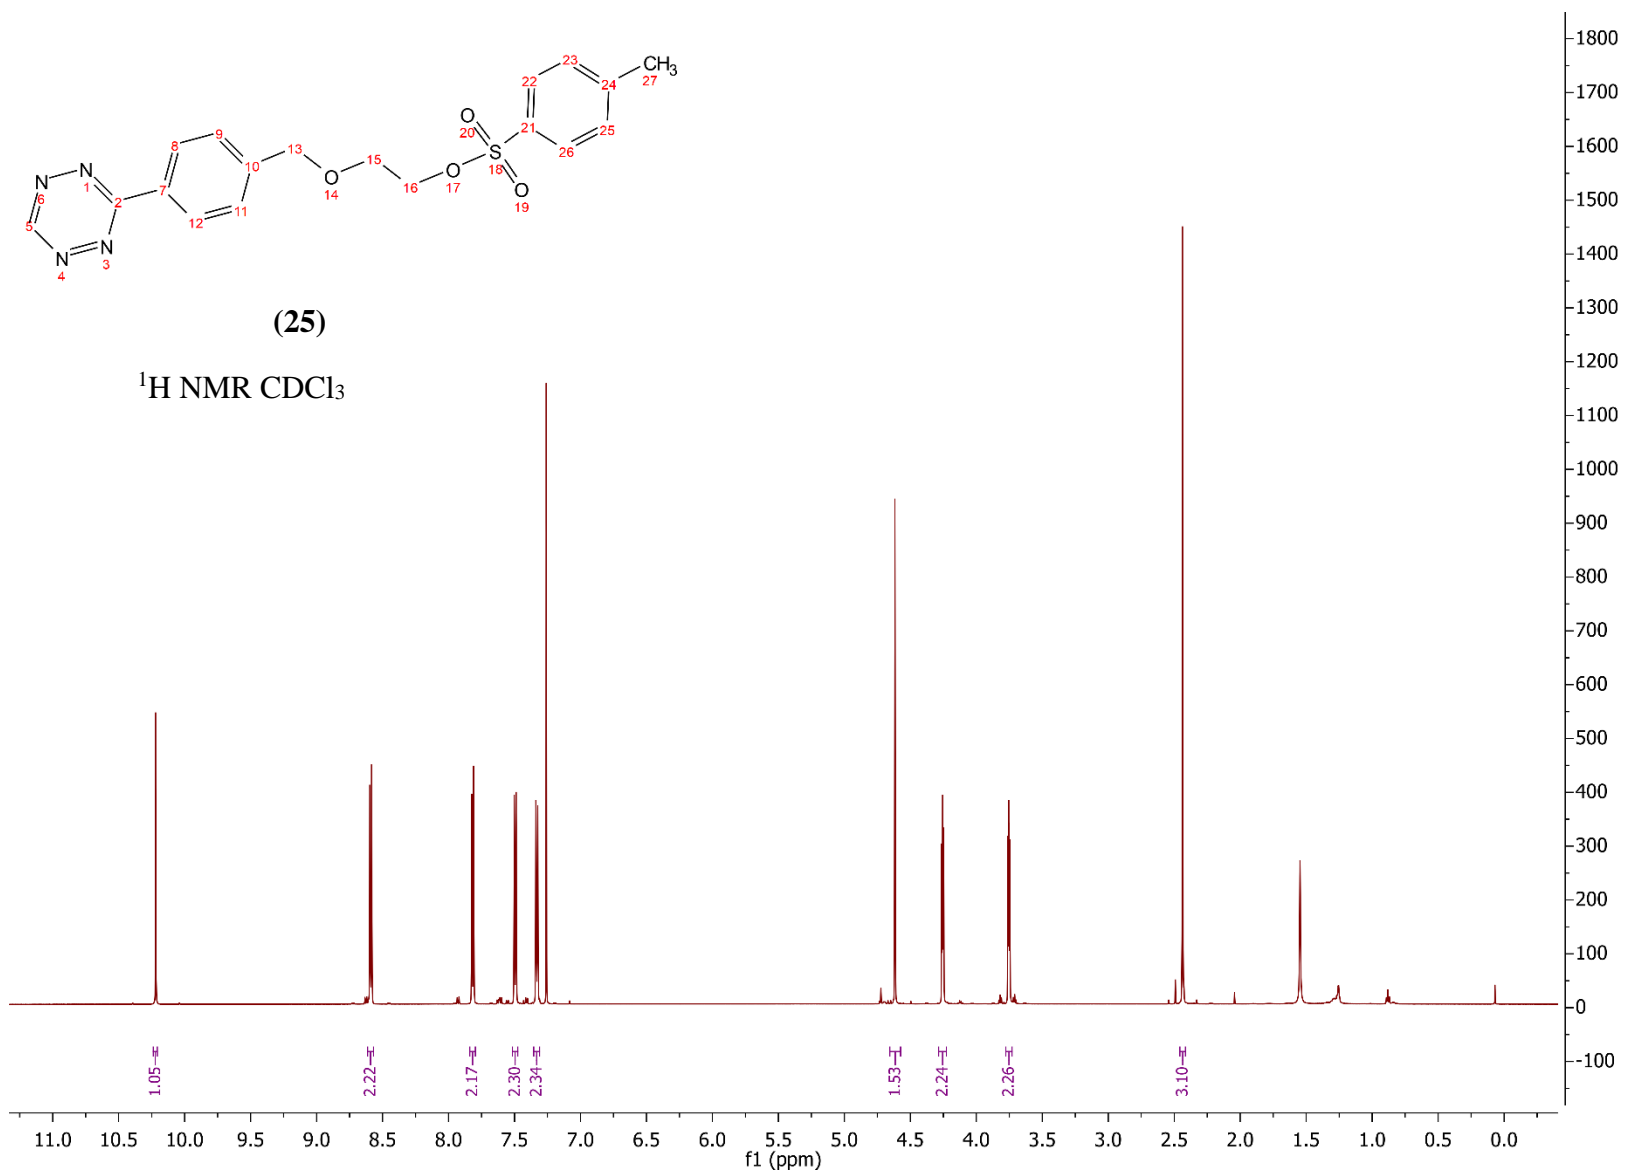

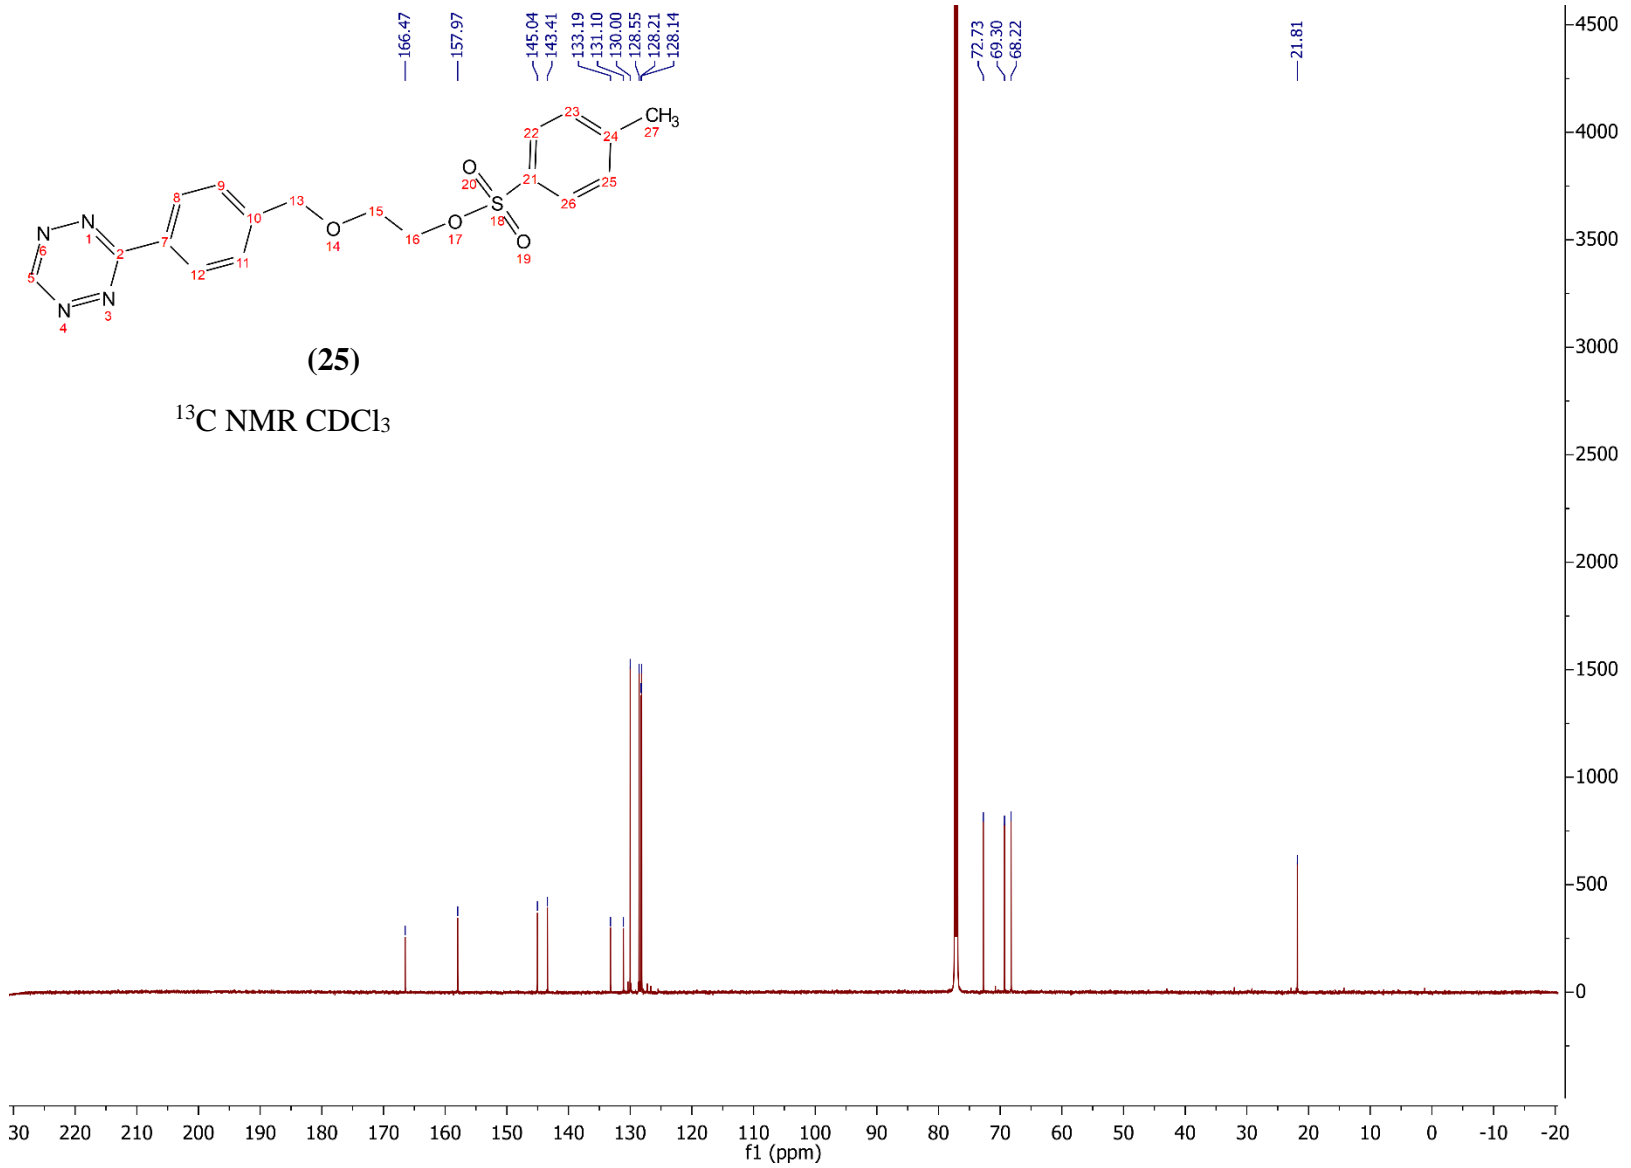

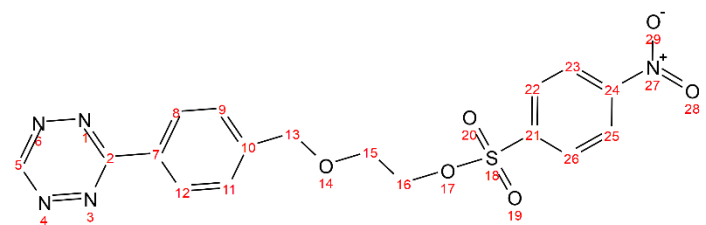

(26)

$^1\text{H NMR CDCl}_3$

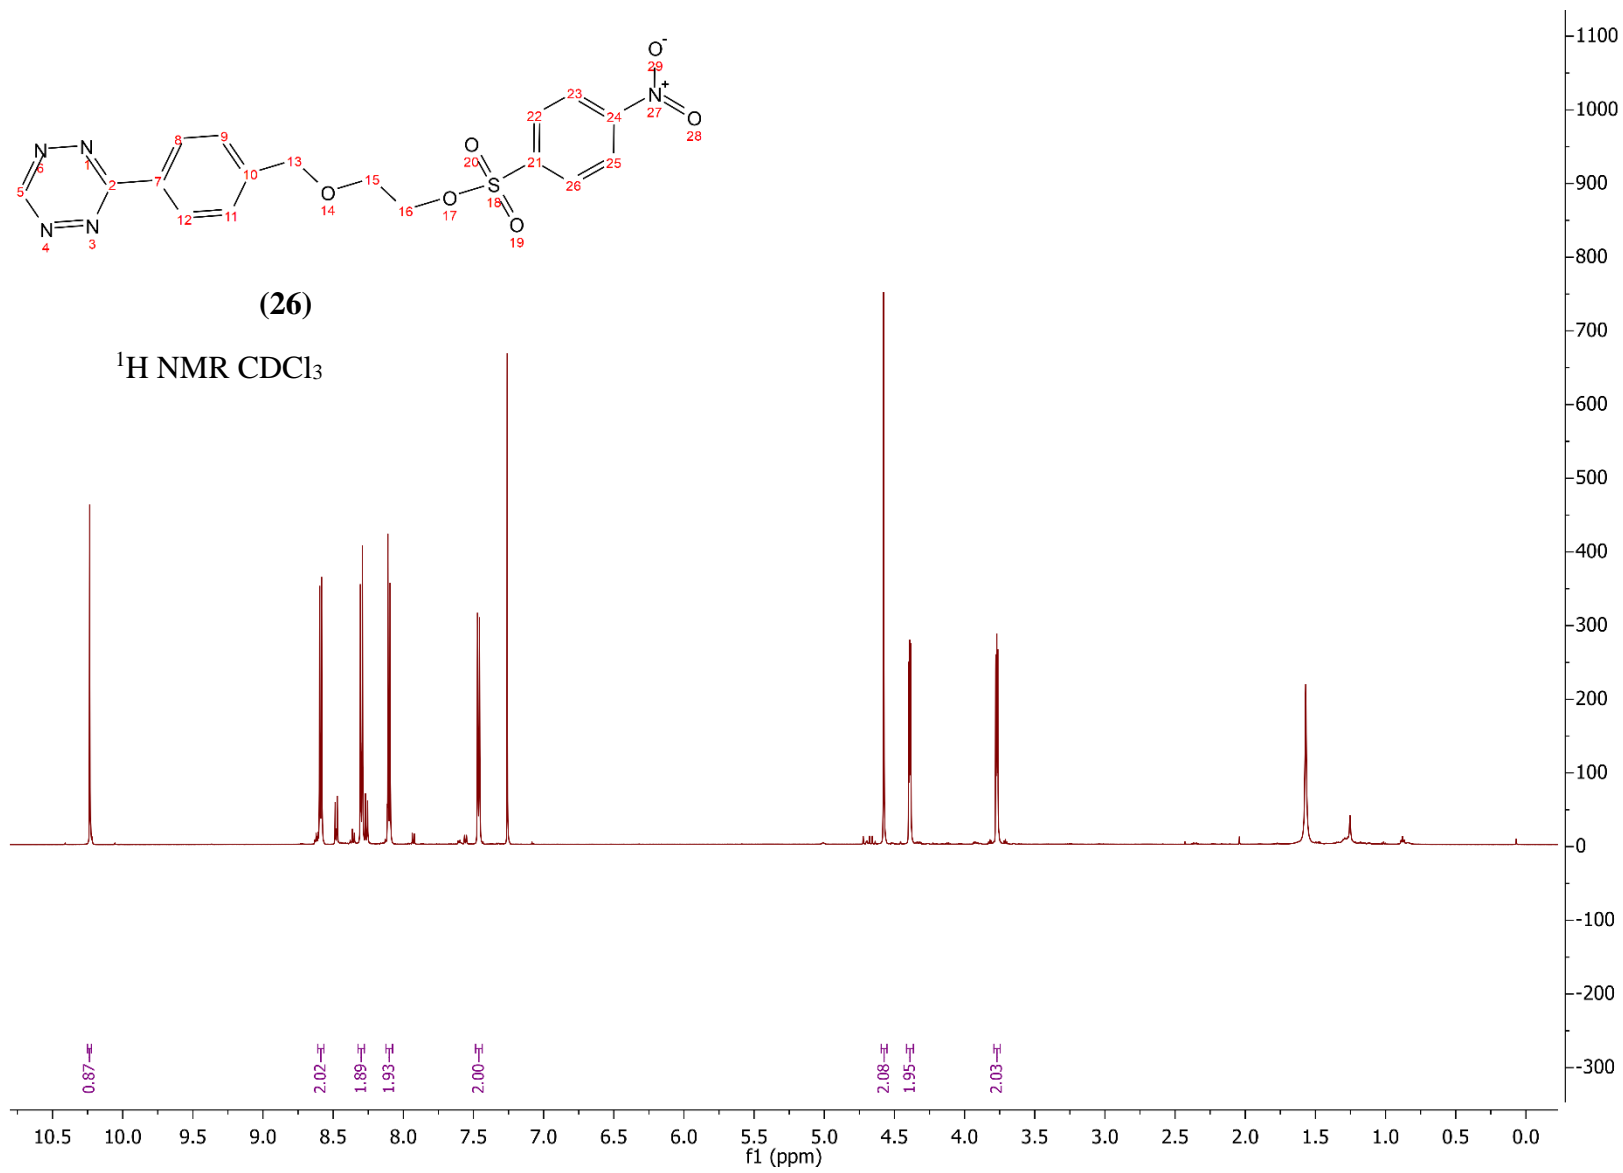



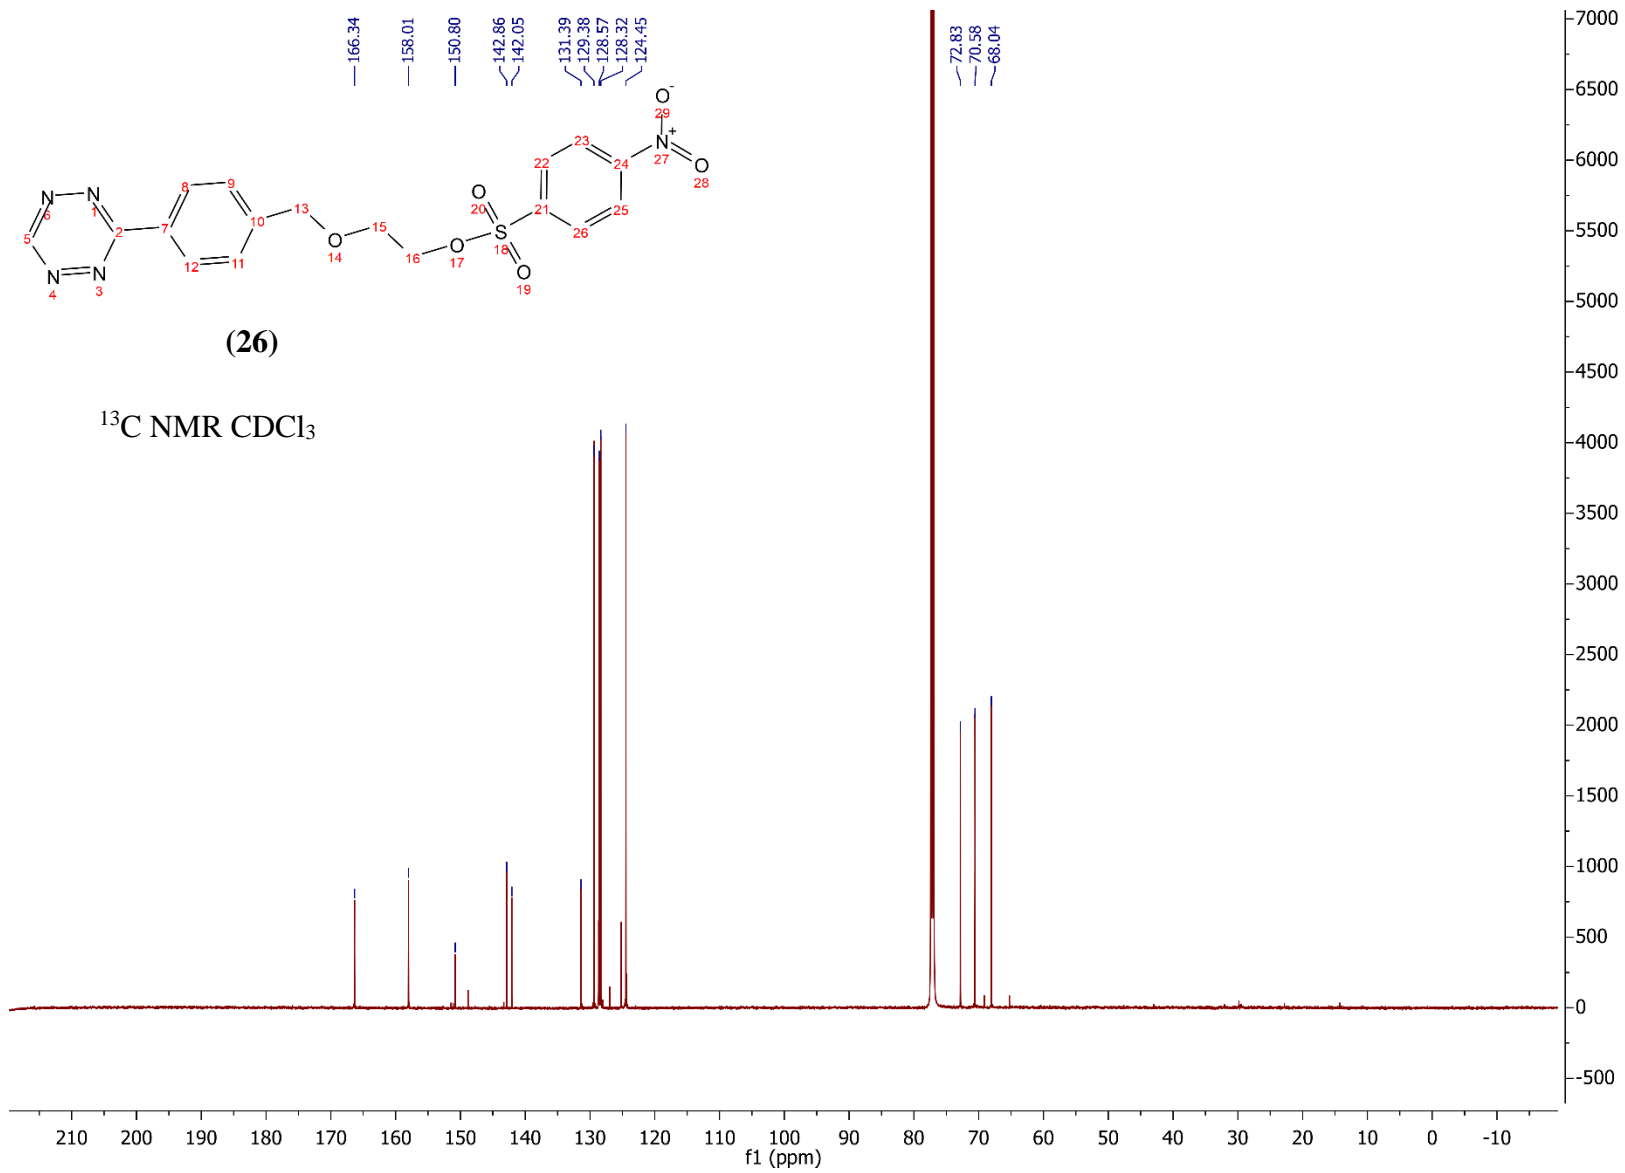

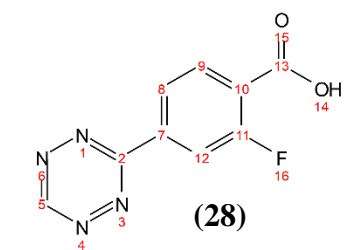

$^1\text{H NMR CD}_3\text{OD}$

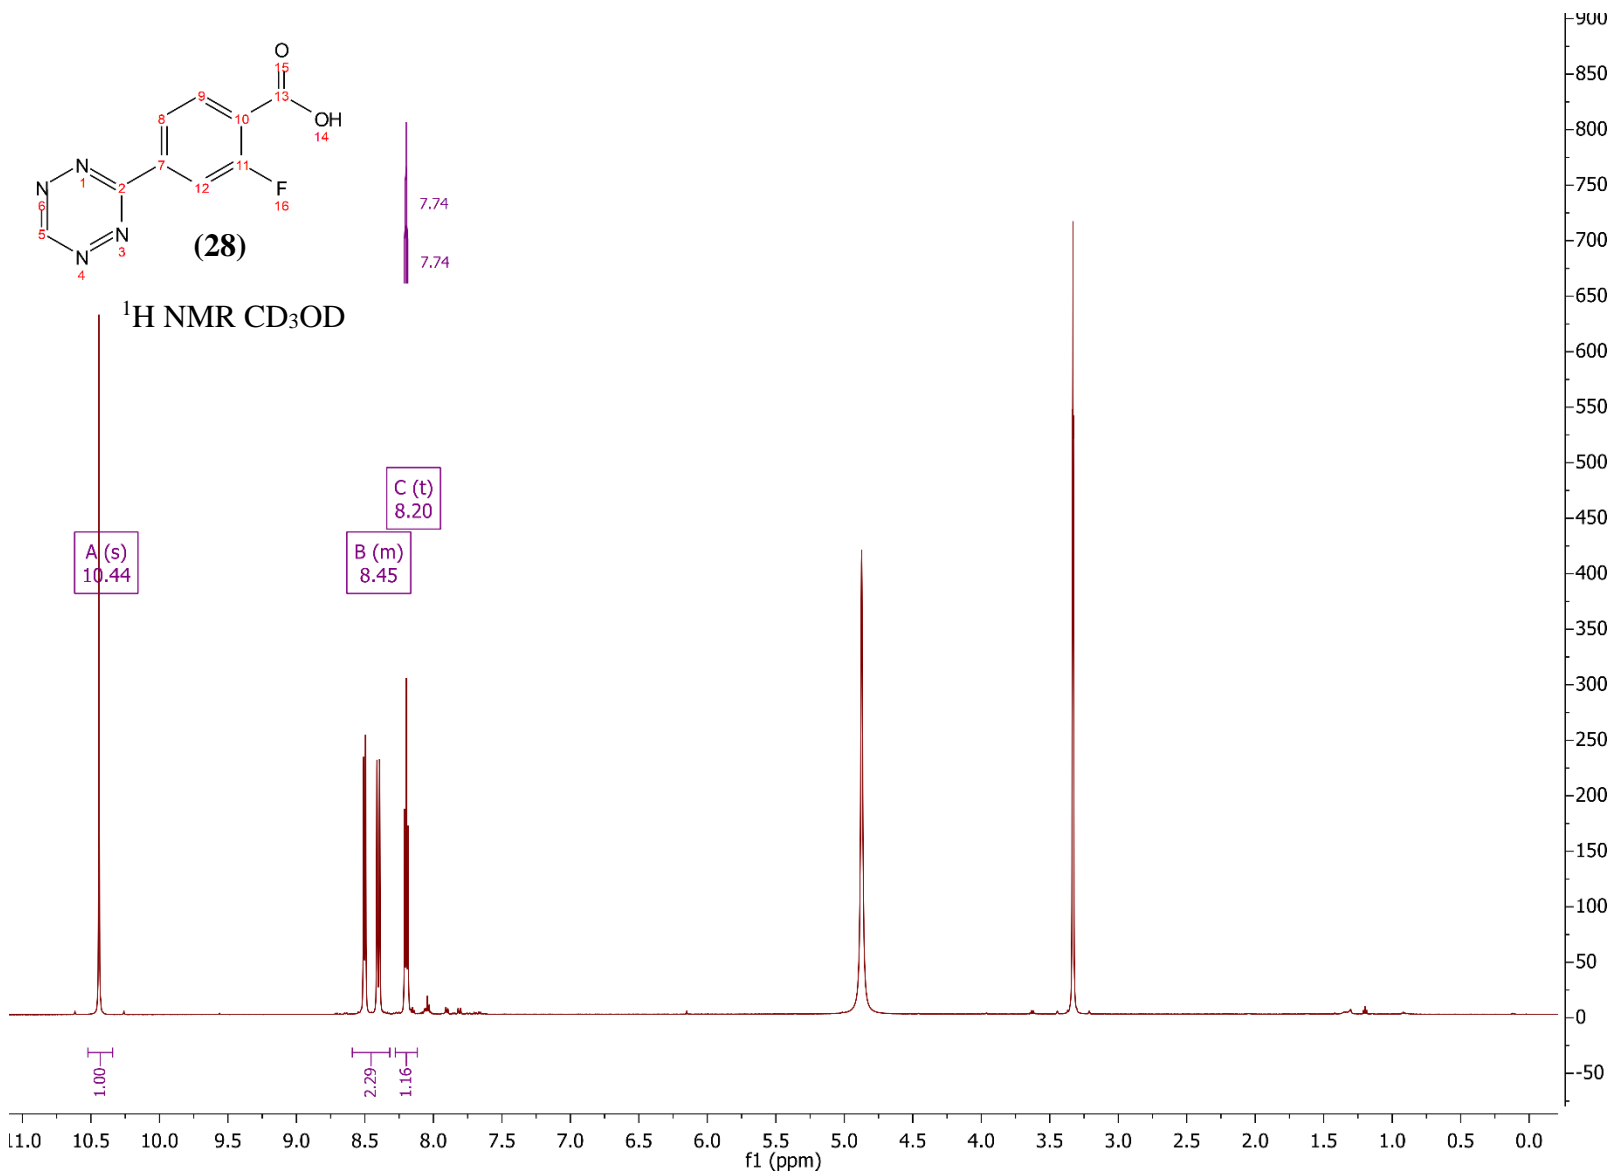

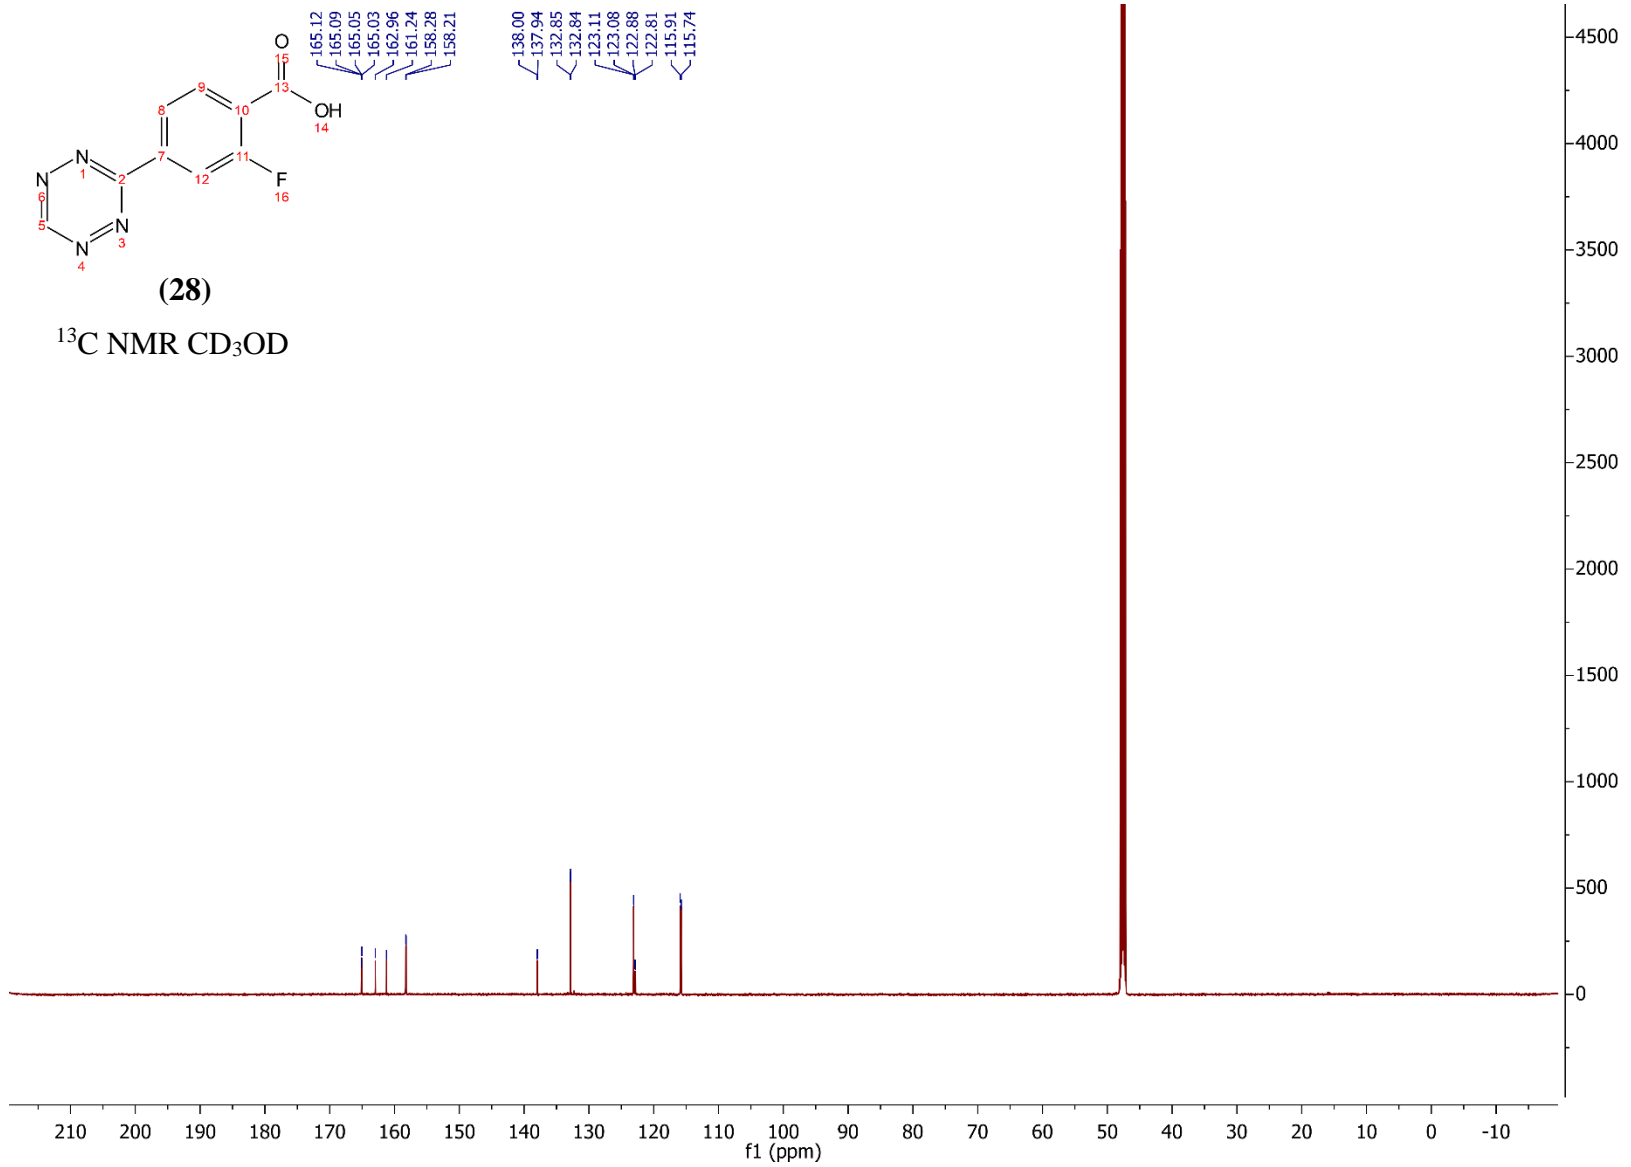

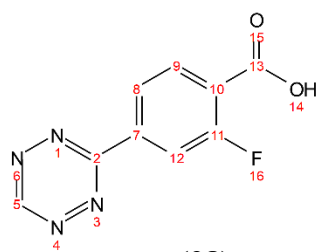

(28)

$^{19}\text{F}$  NMR  $\text{CD}_3\text{OD}$

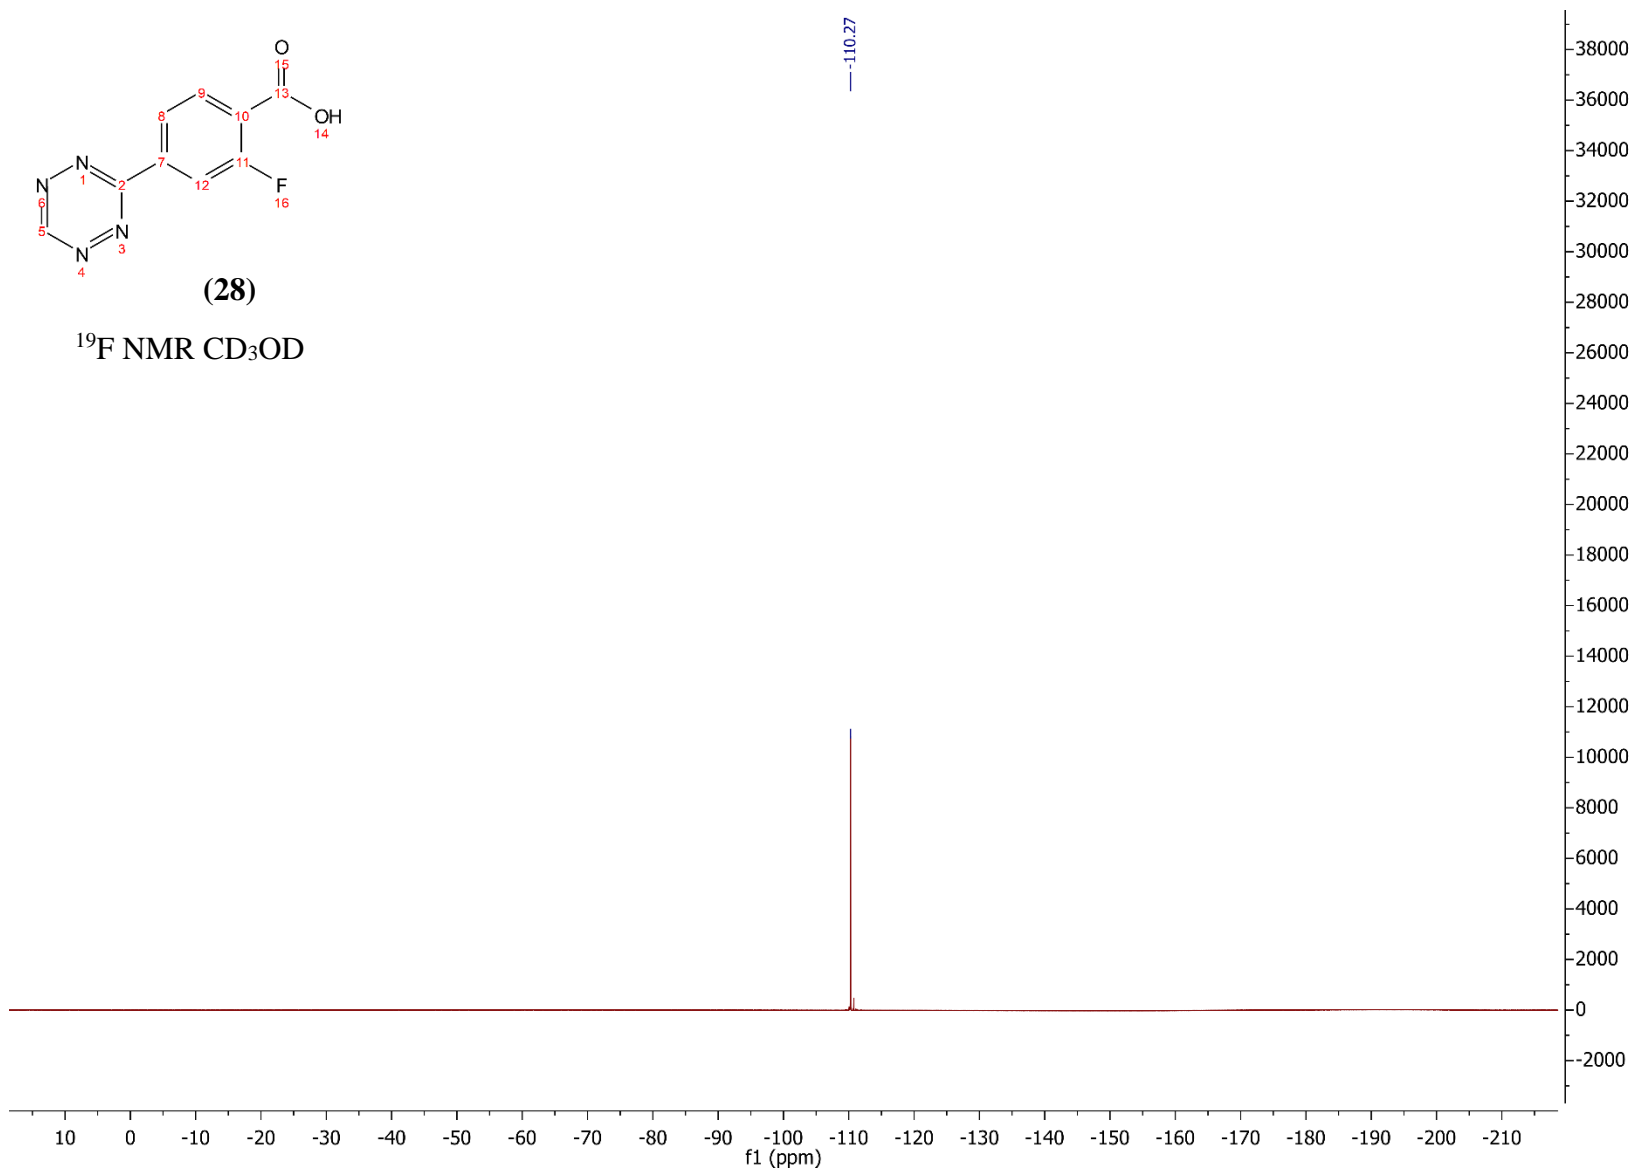

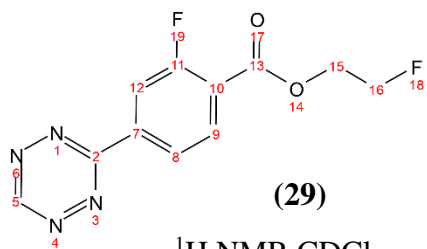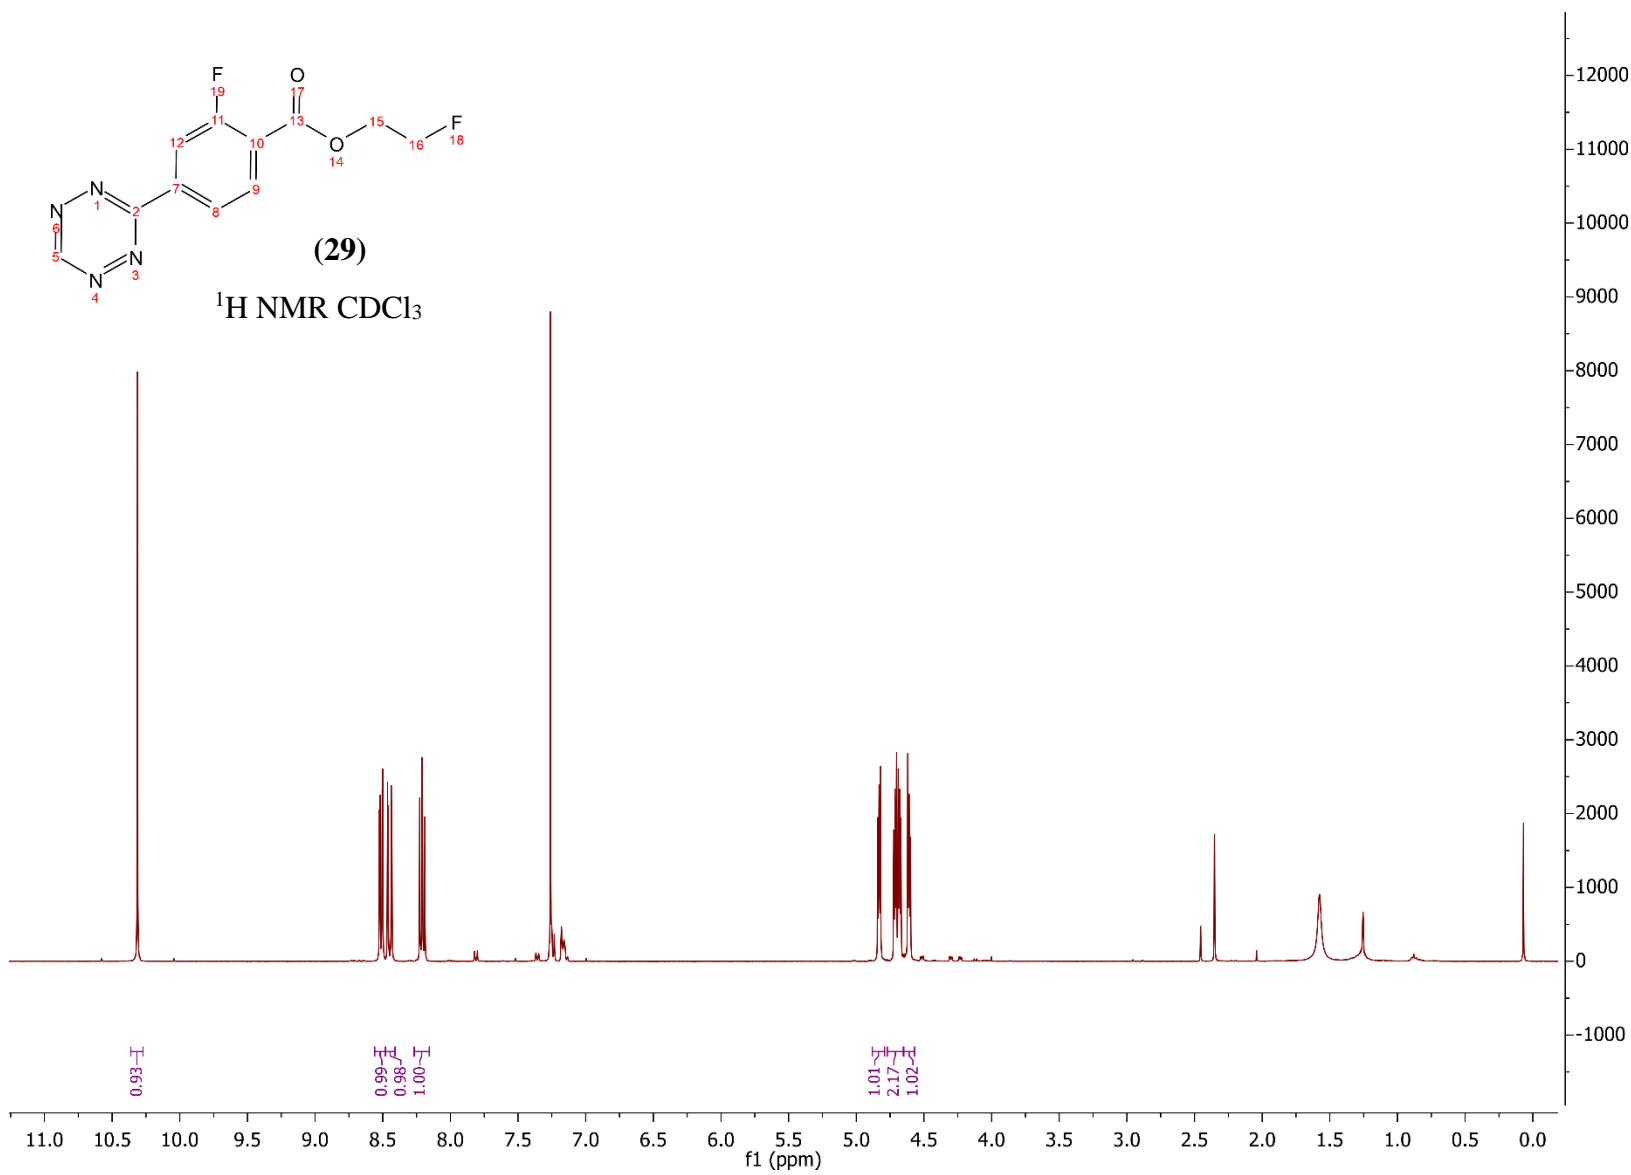

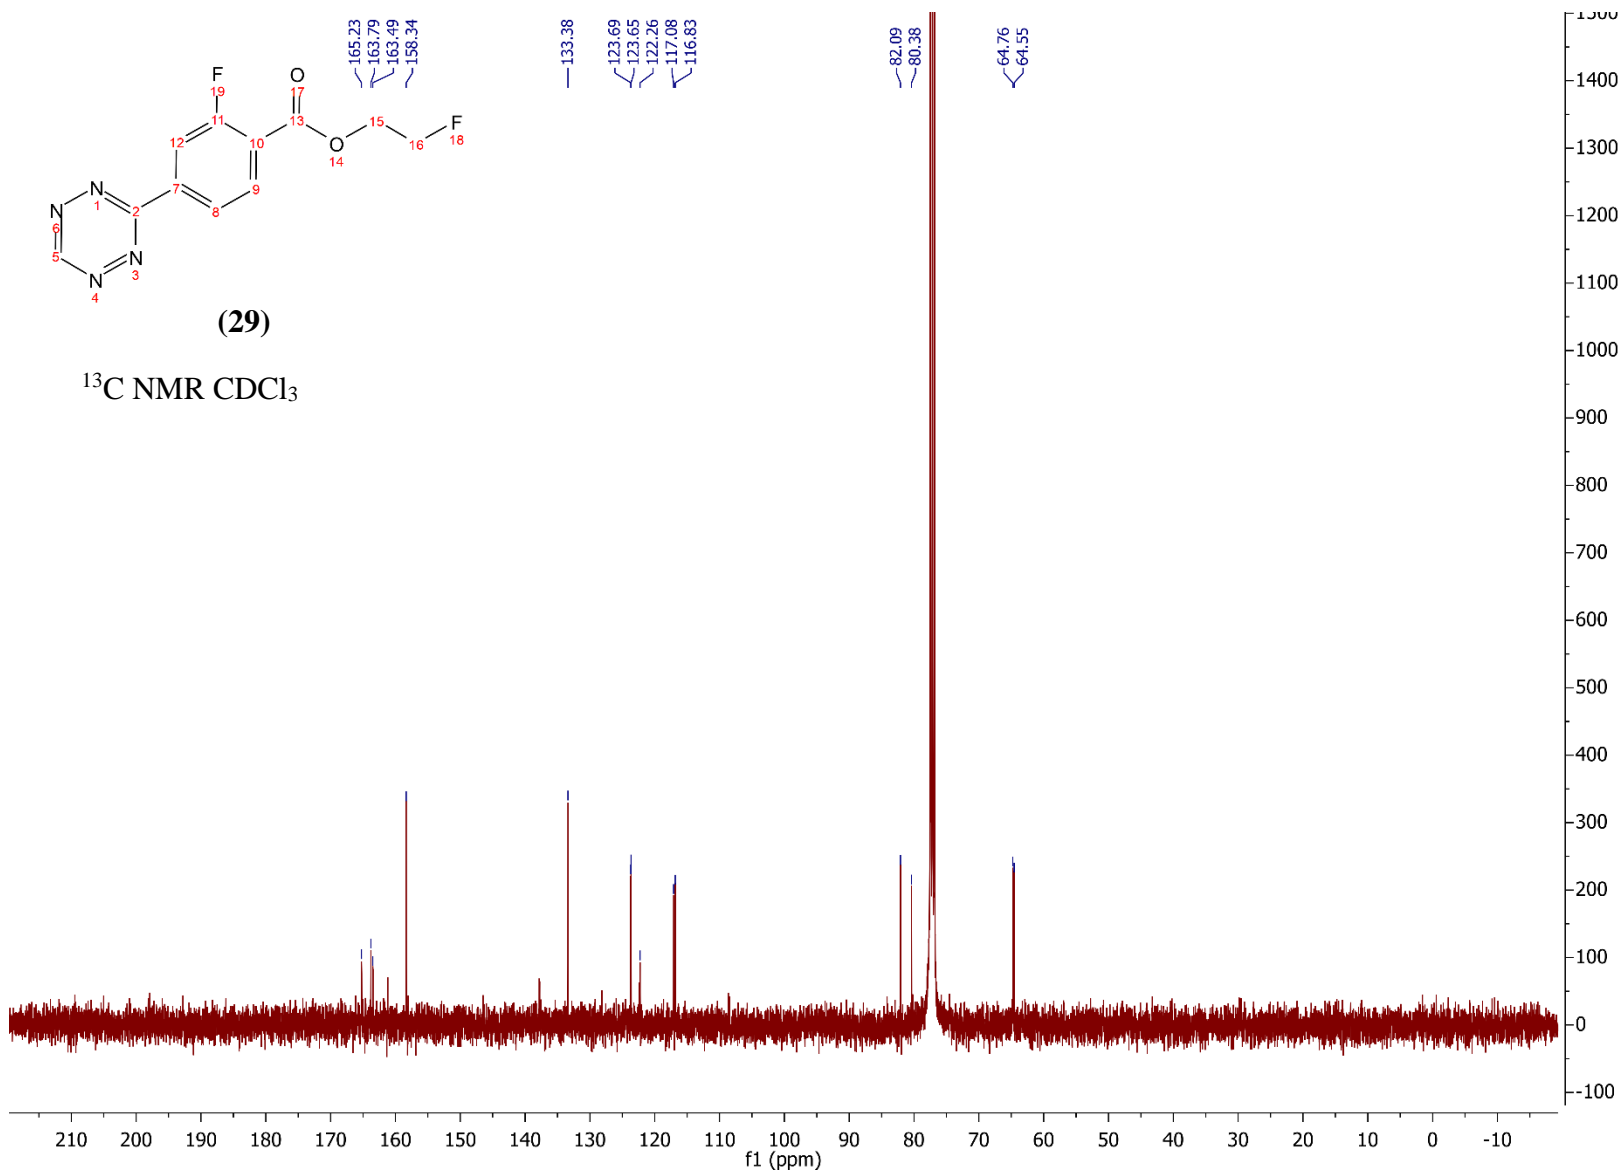

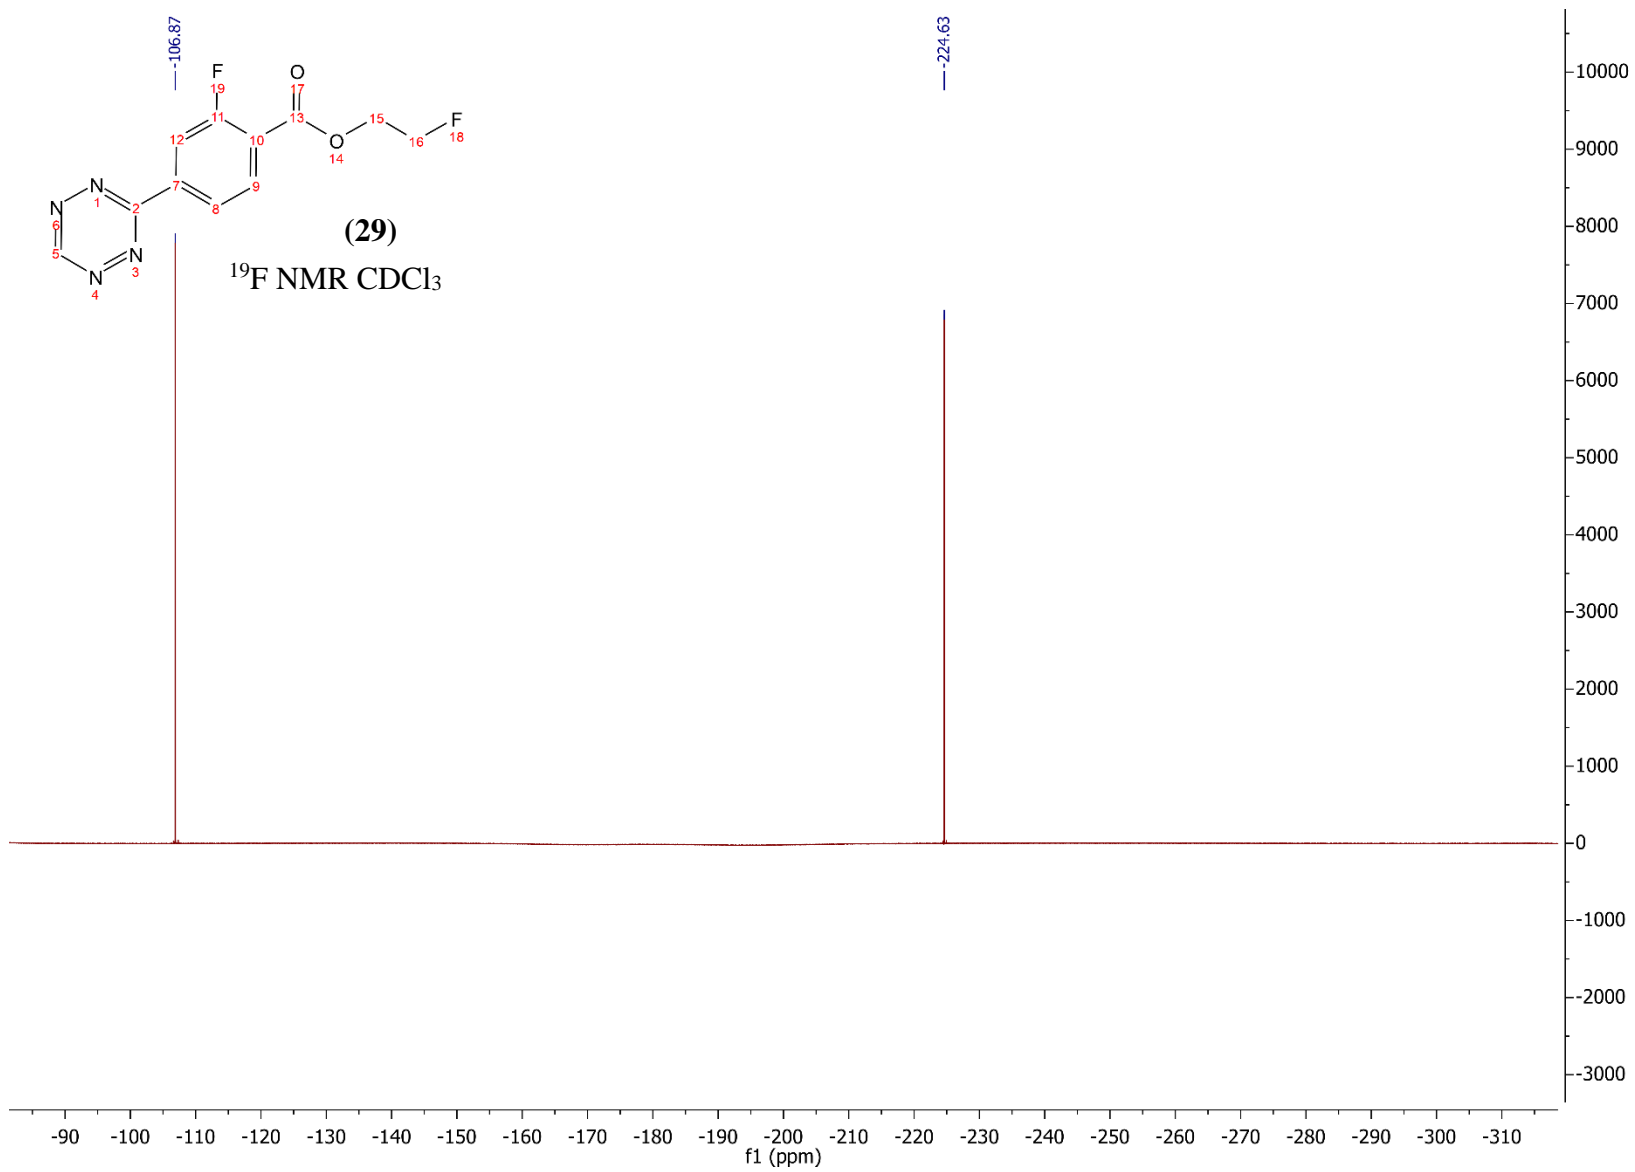

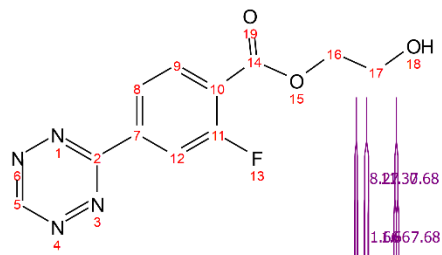

(30)

<sup>1</sup>H NMR CDCl<sub>3</sub>

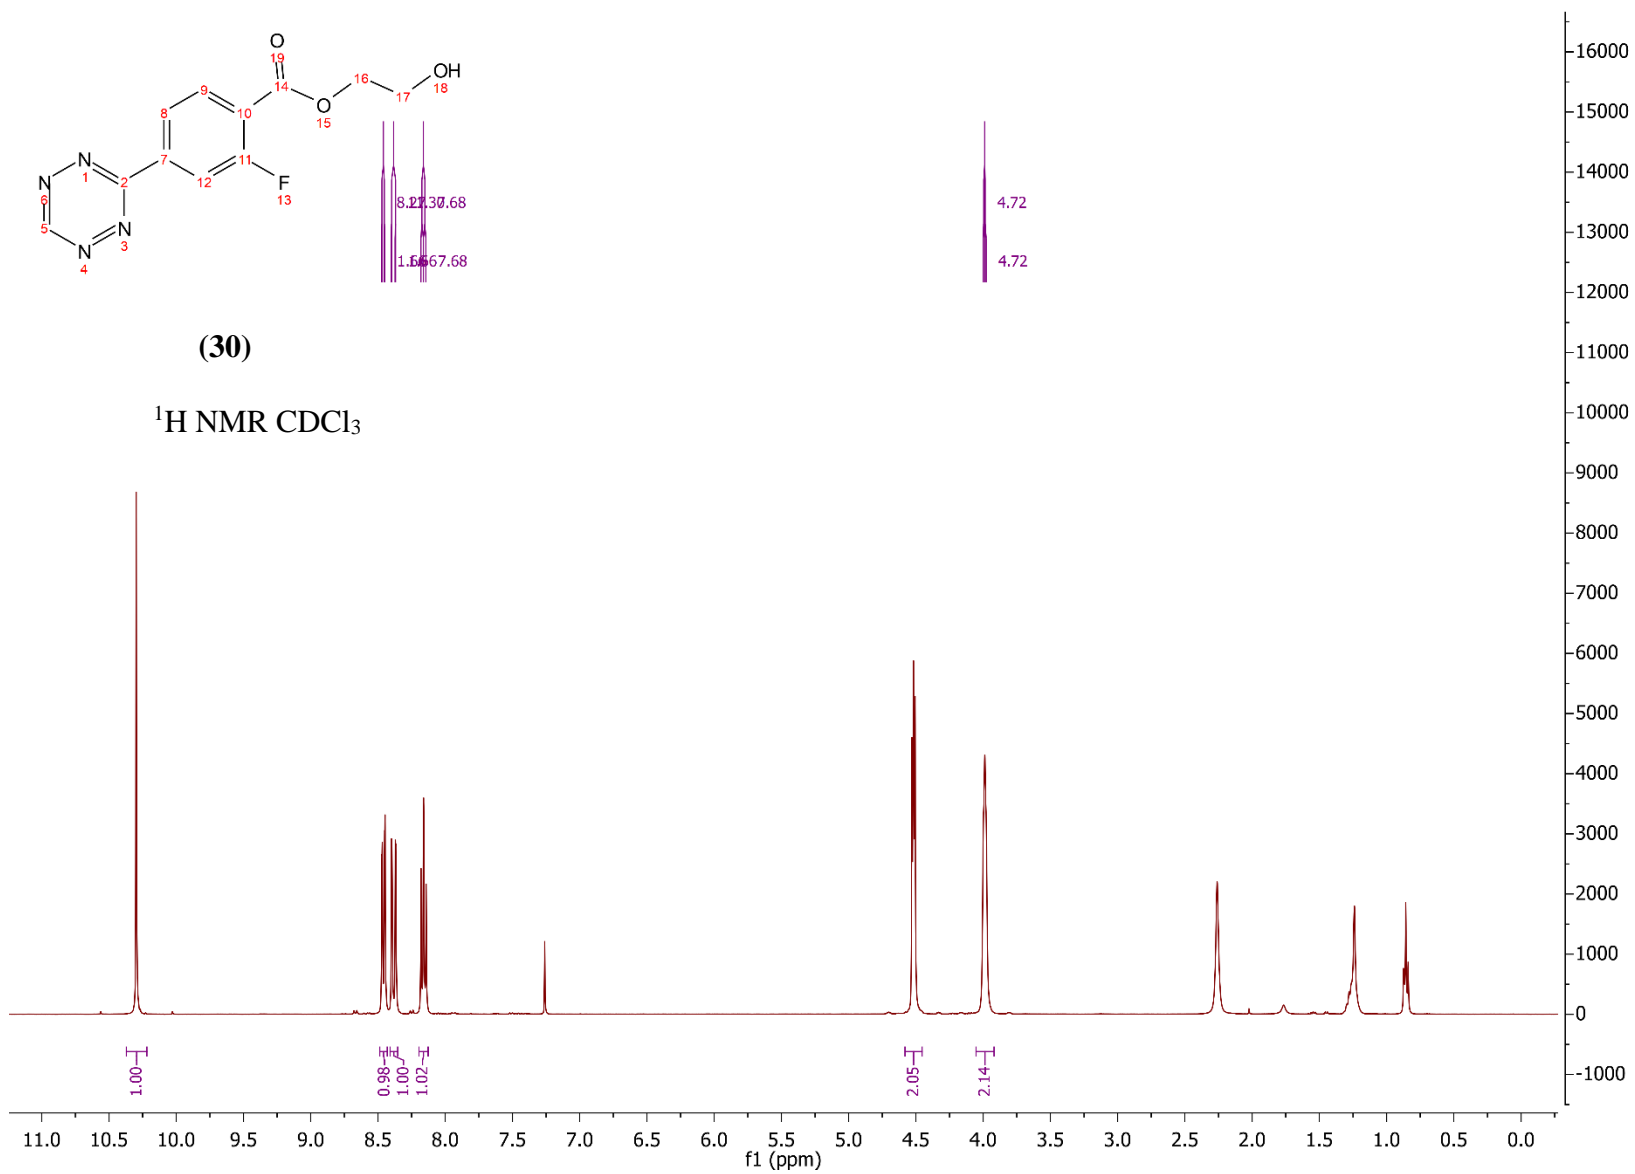



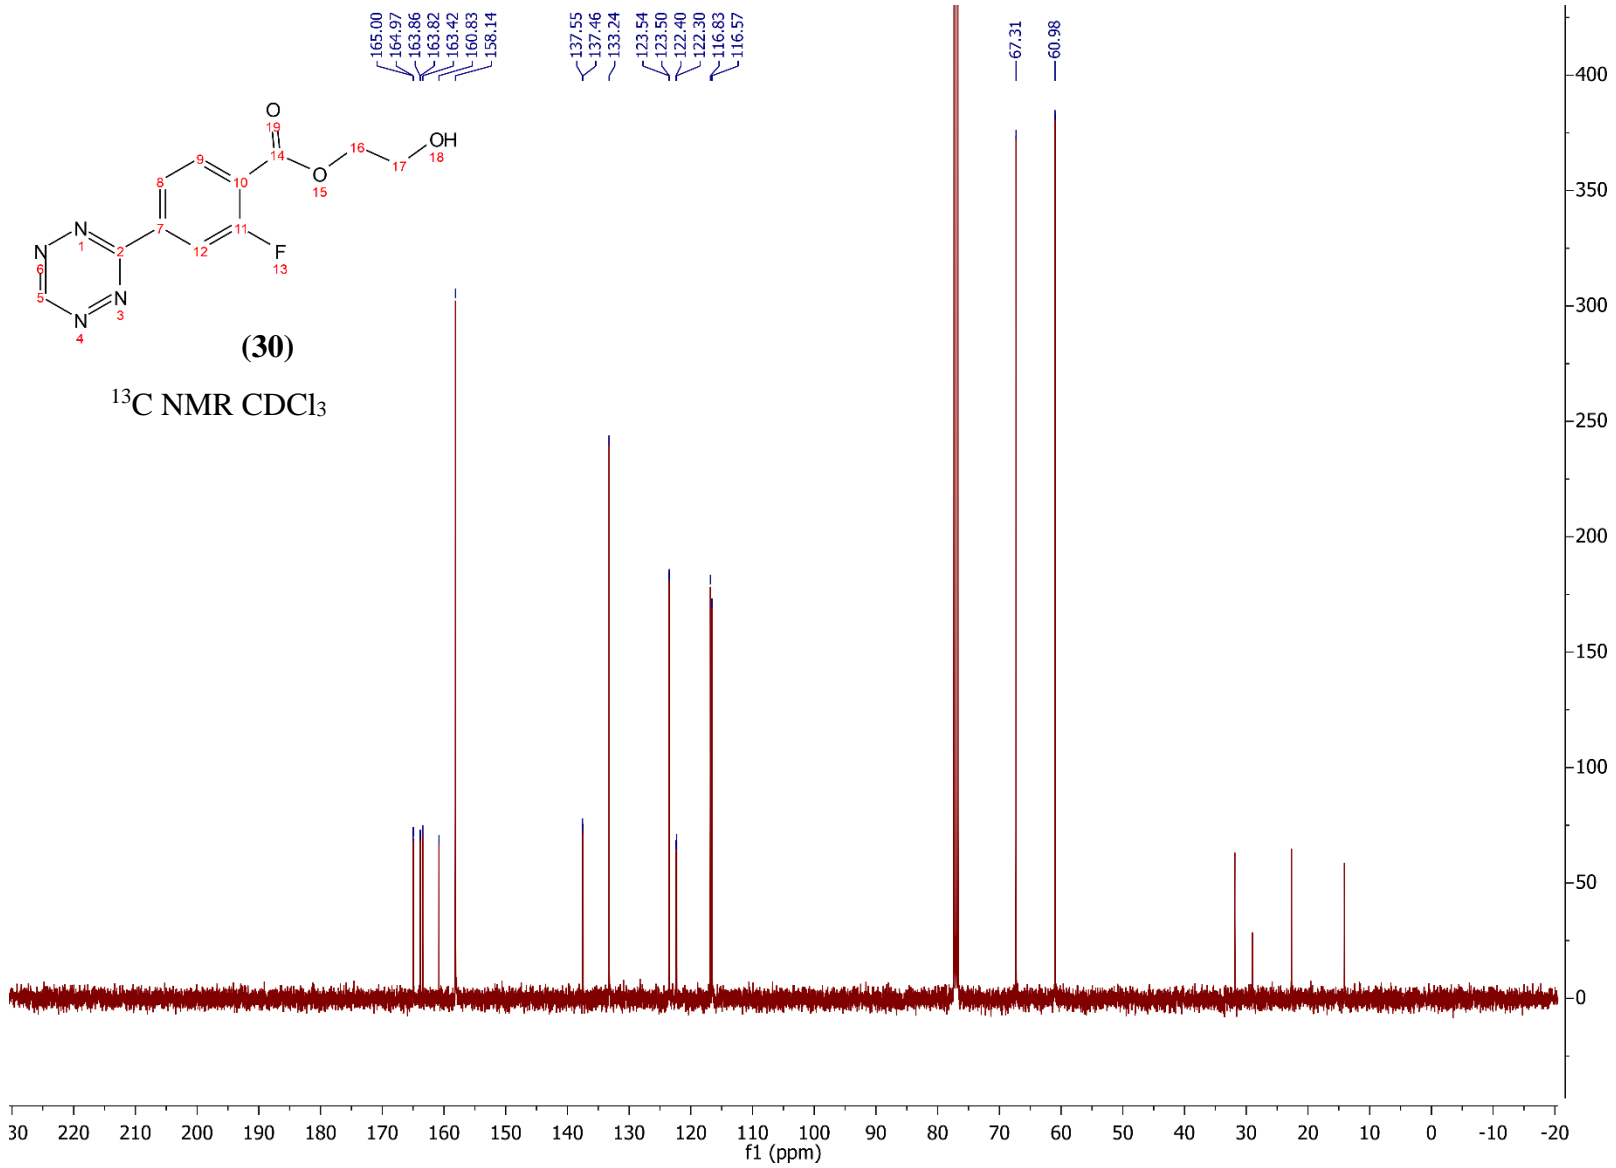

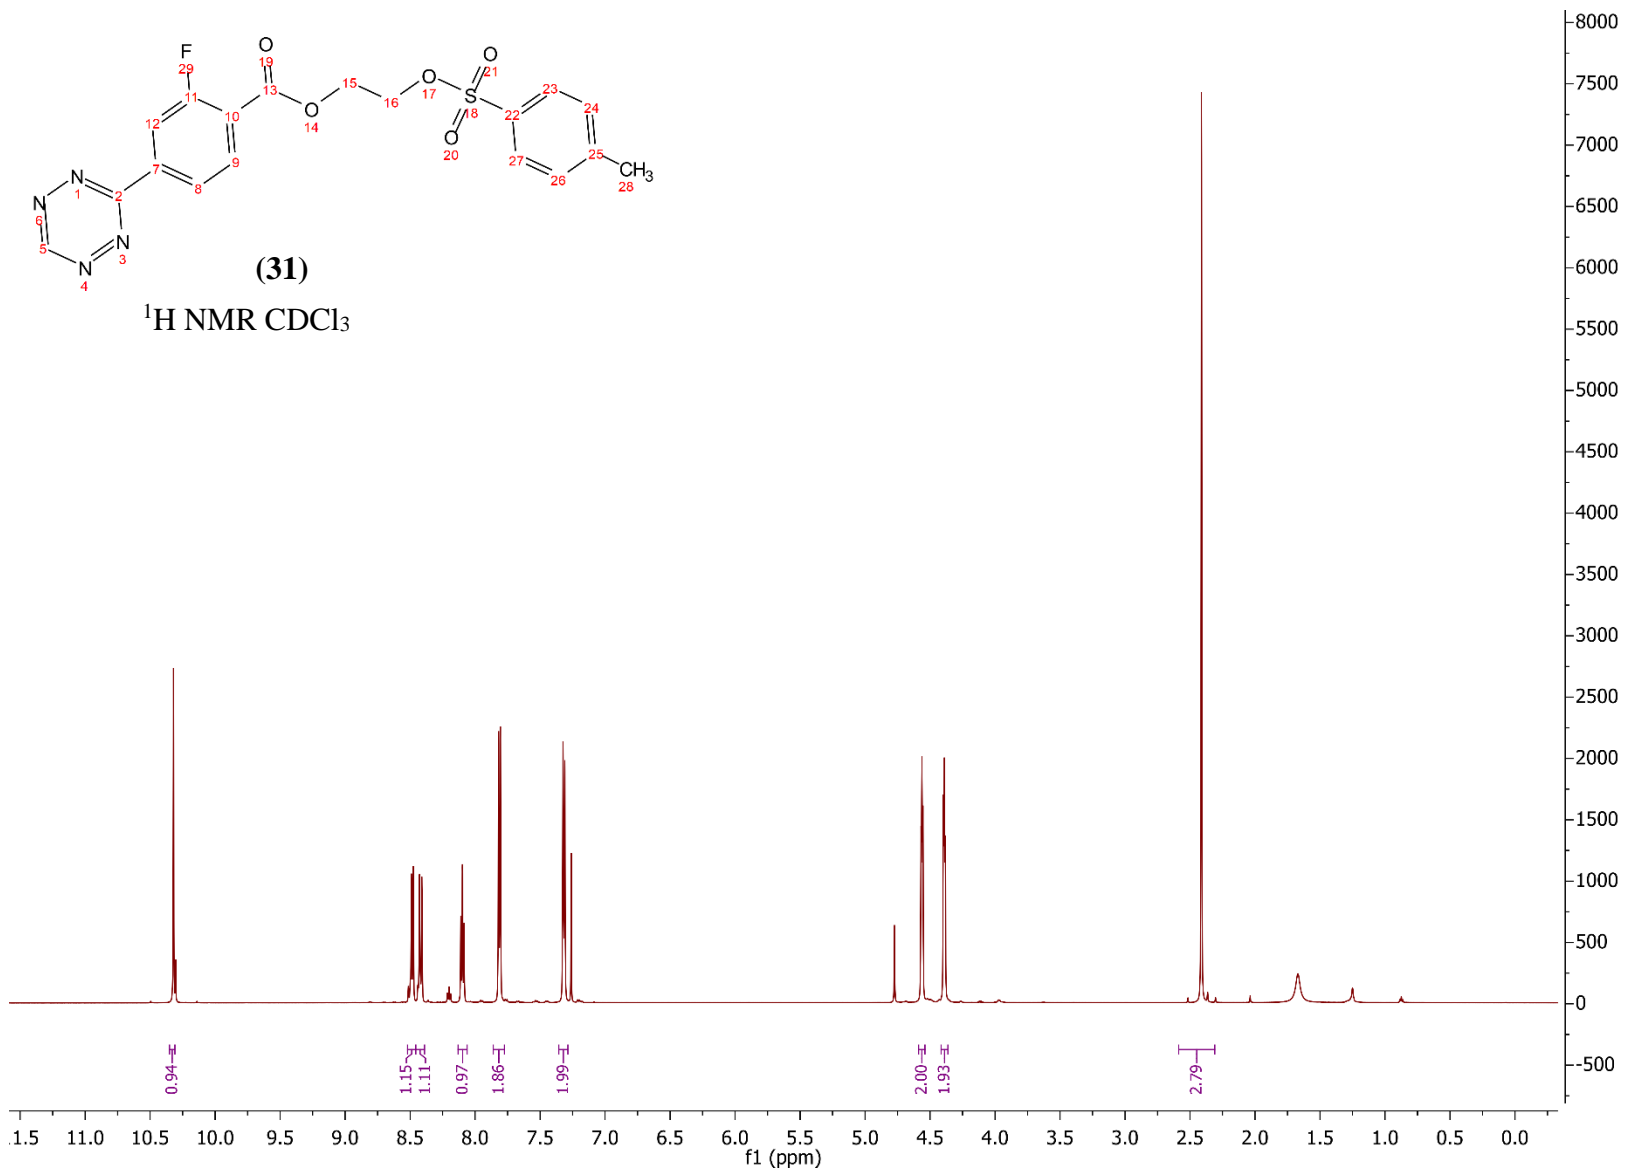

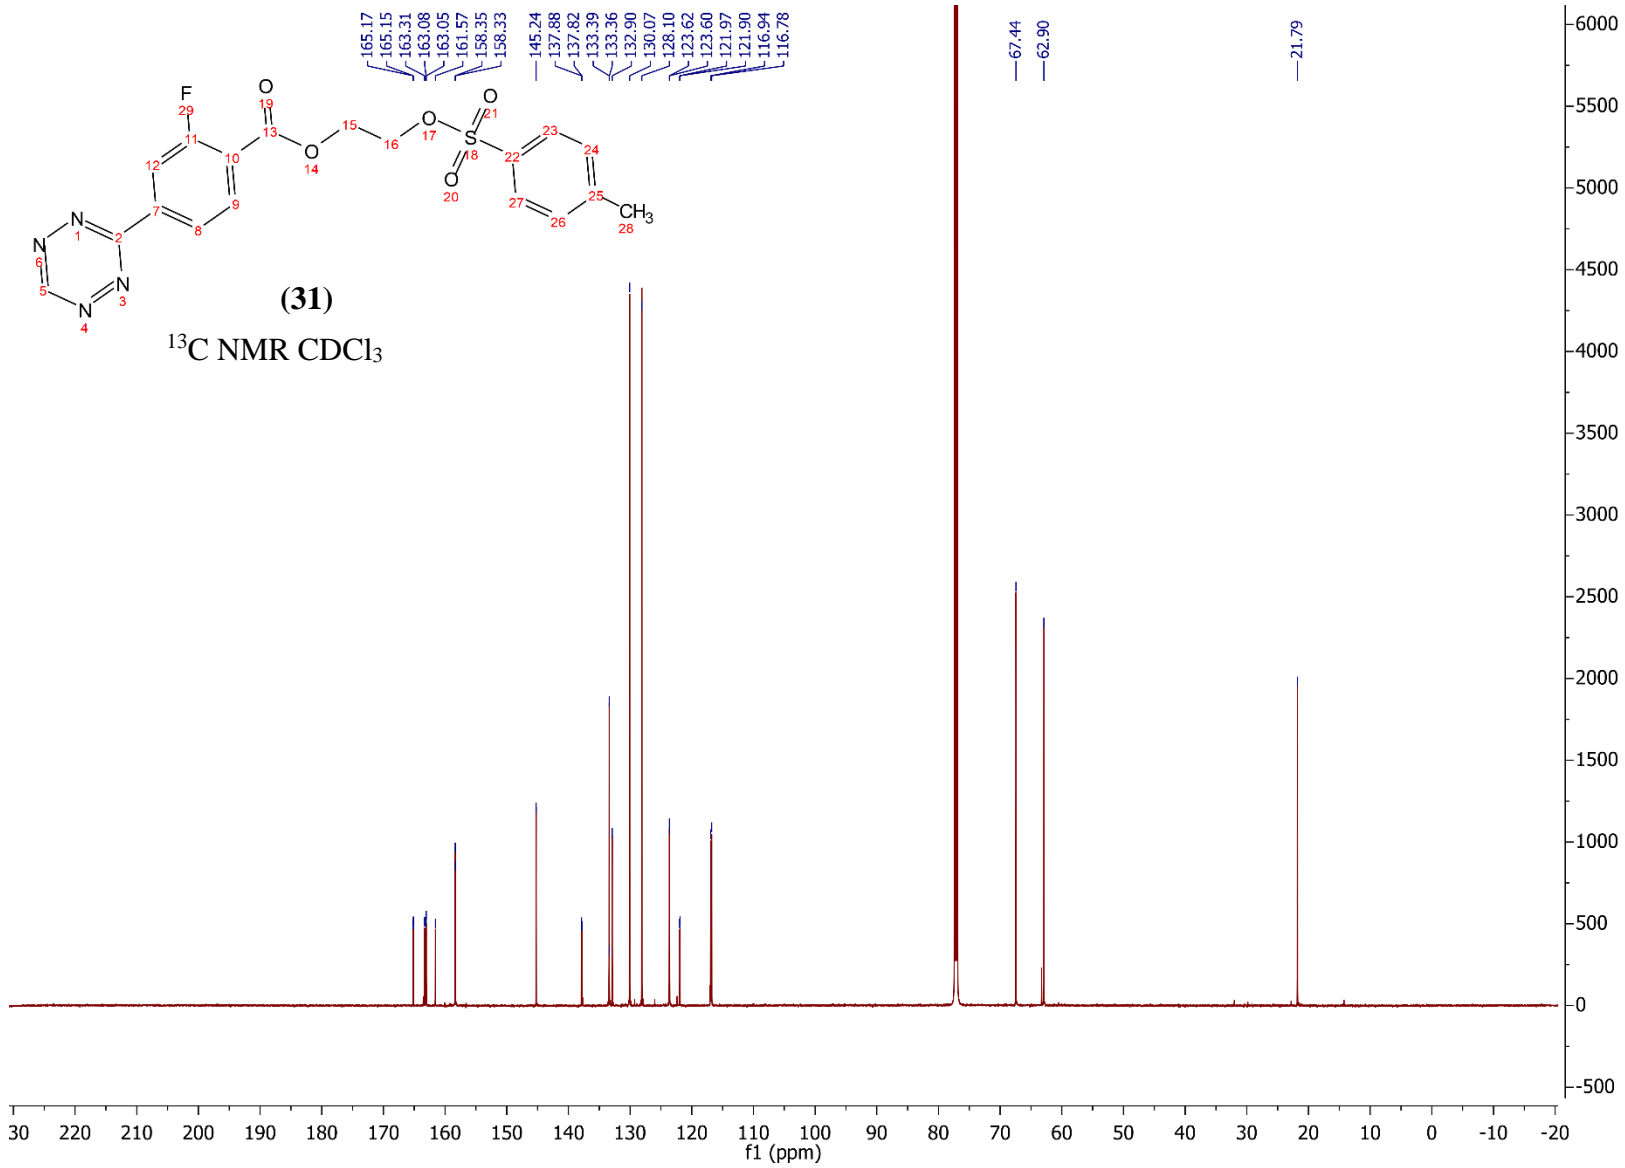

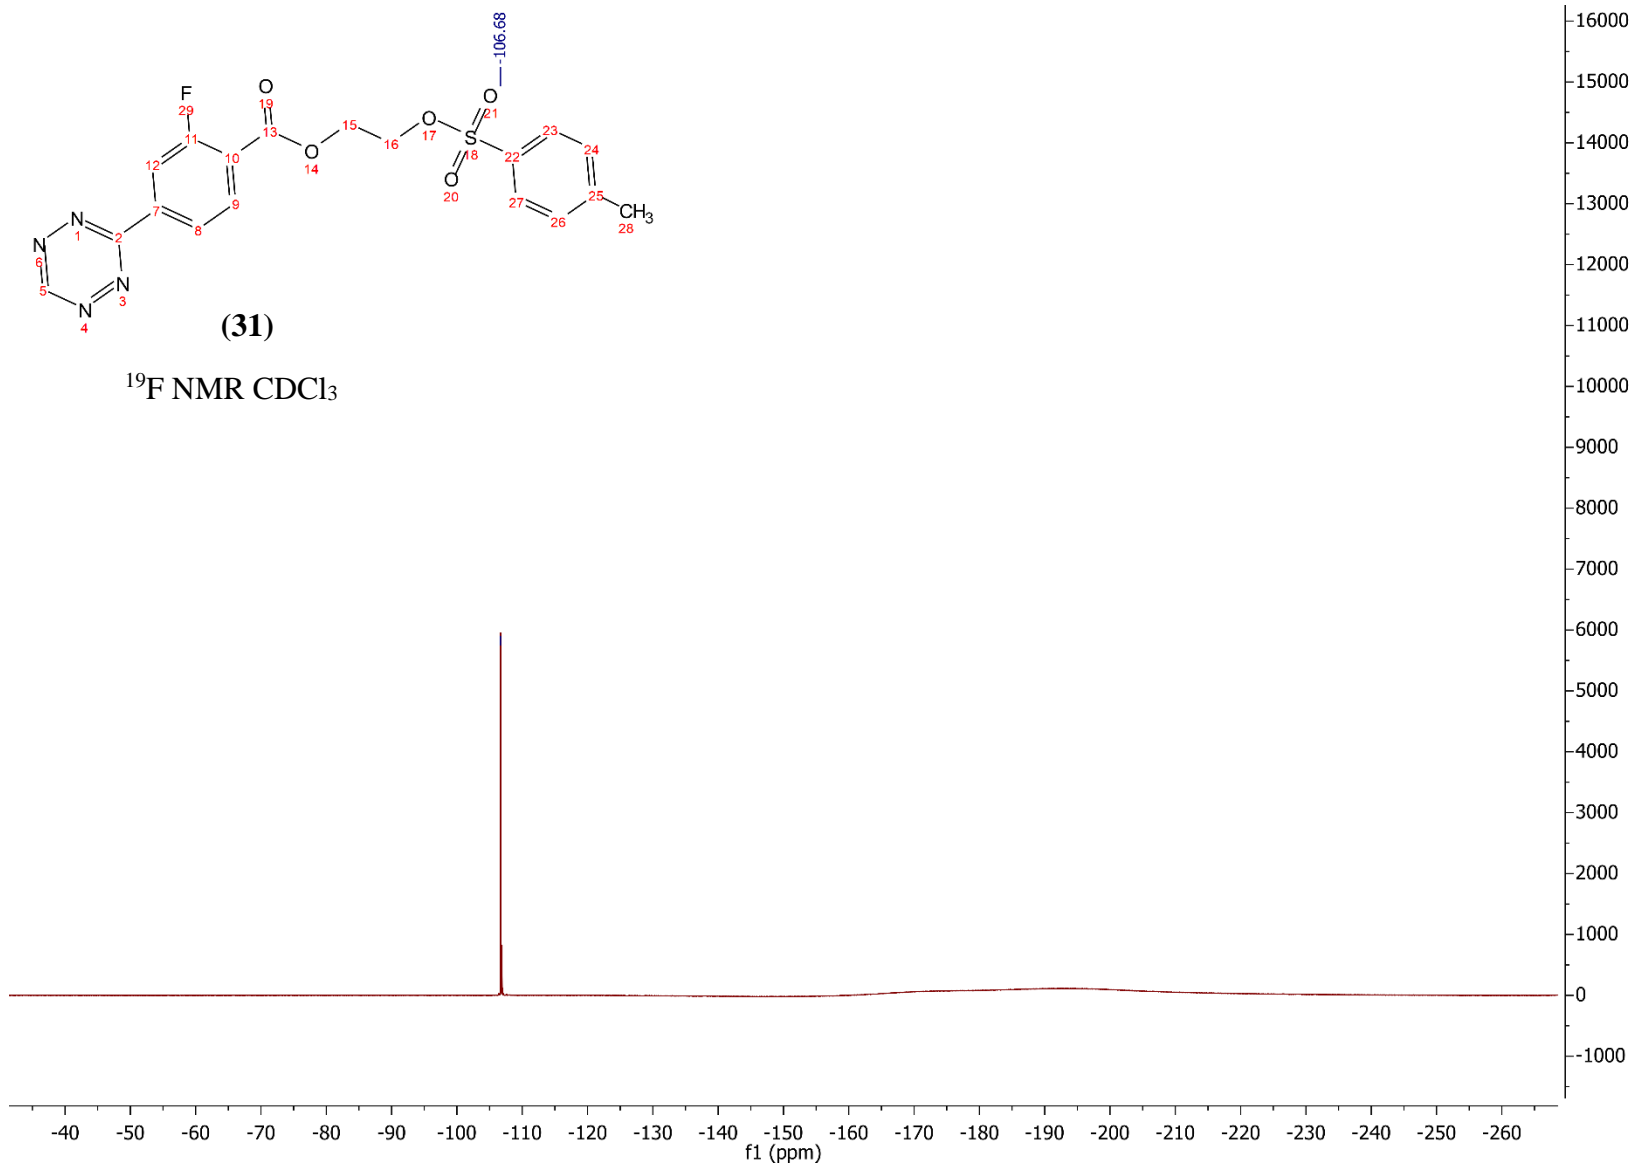

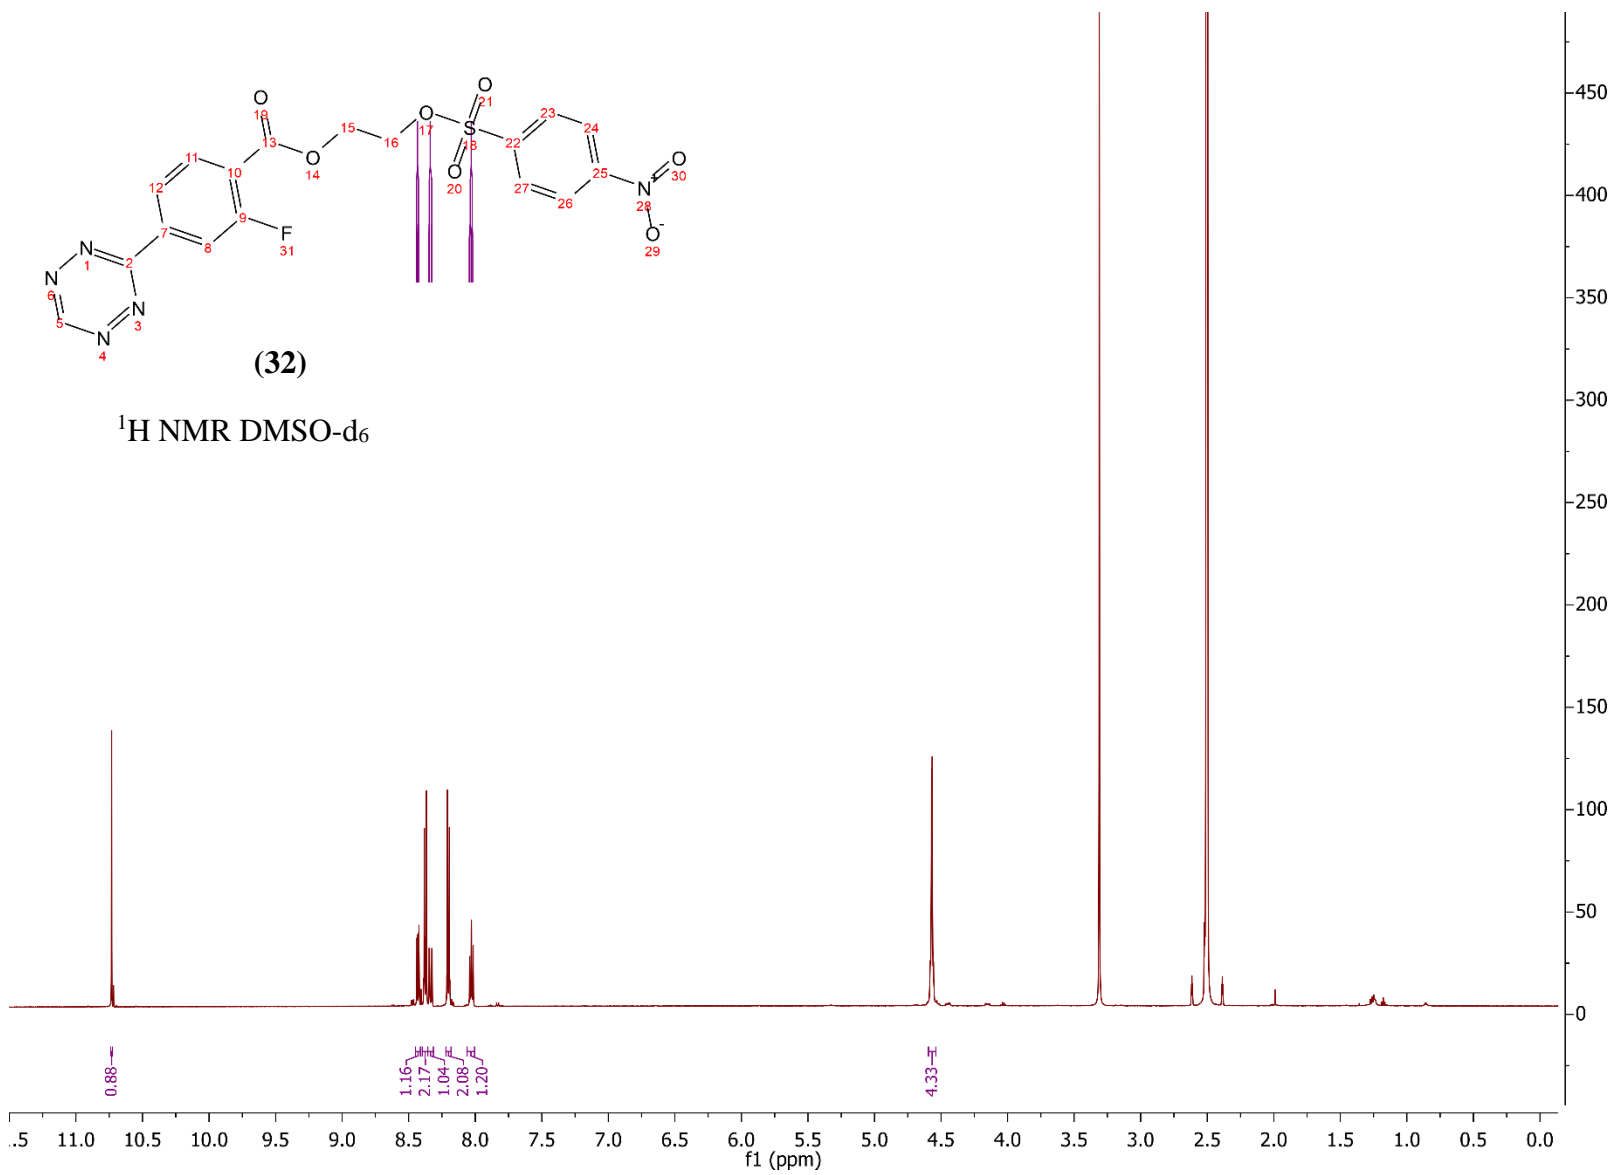

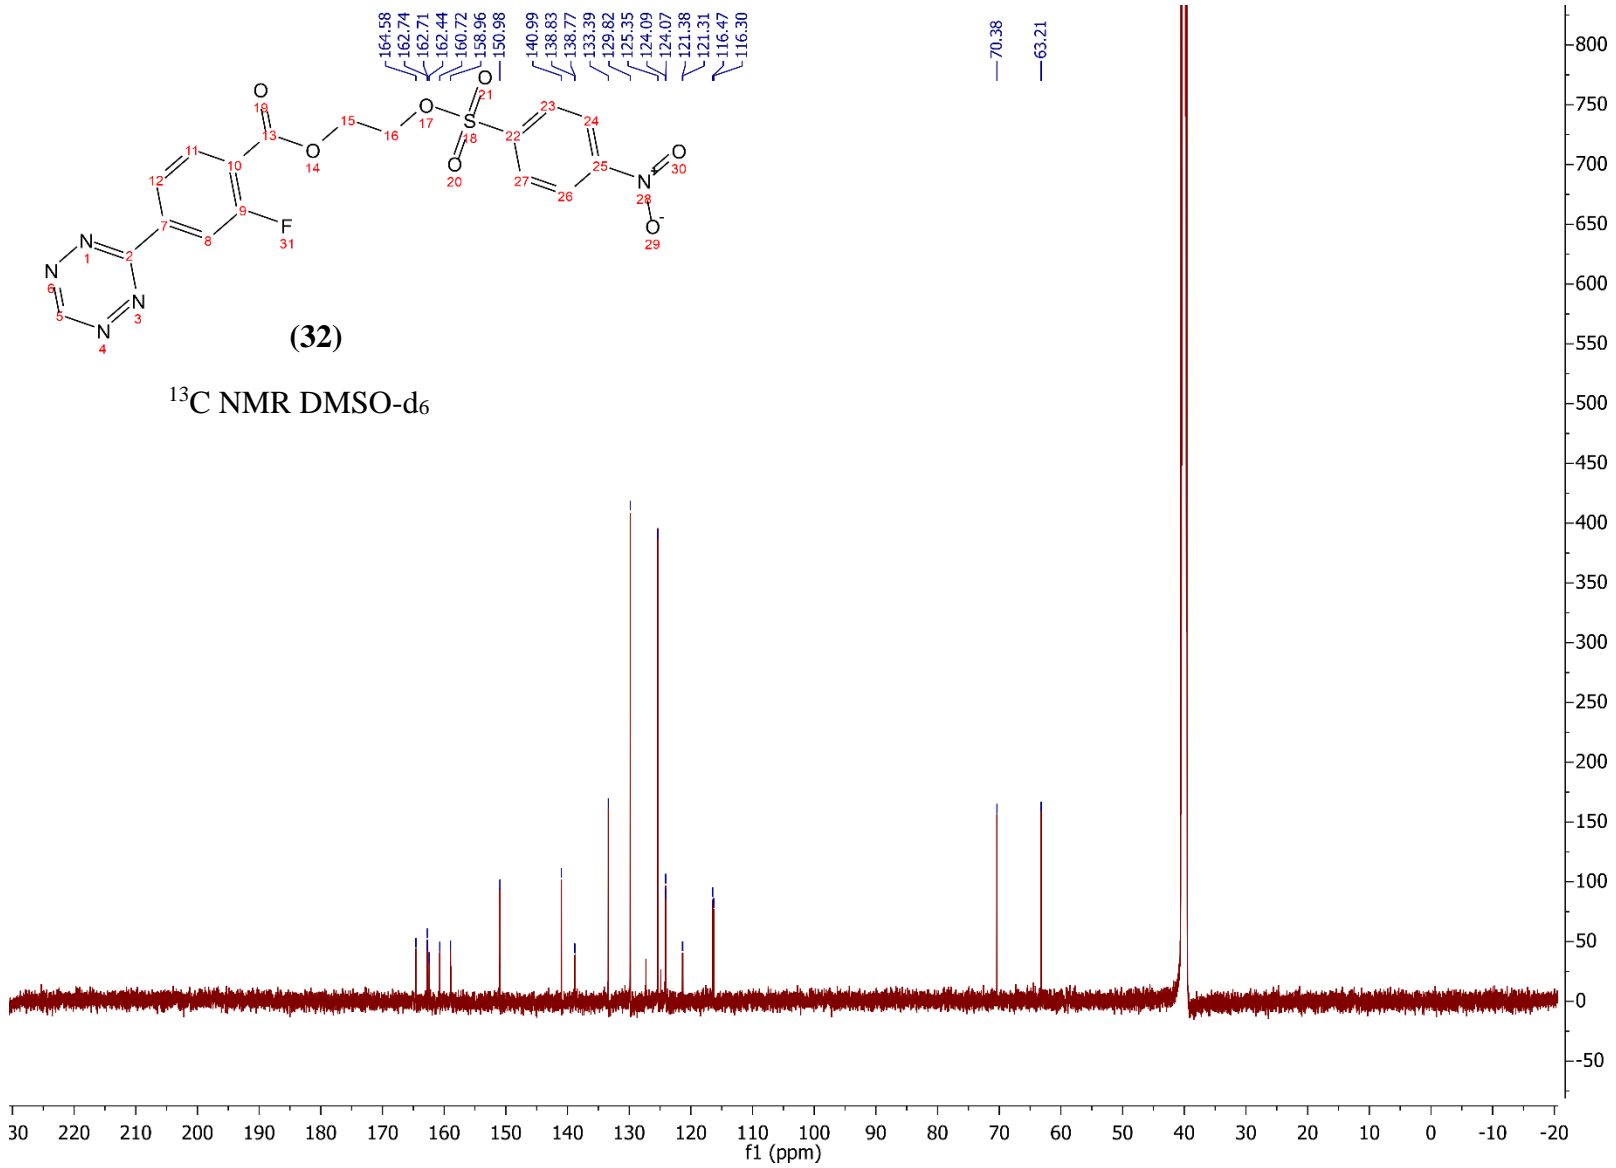

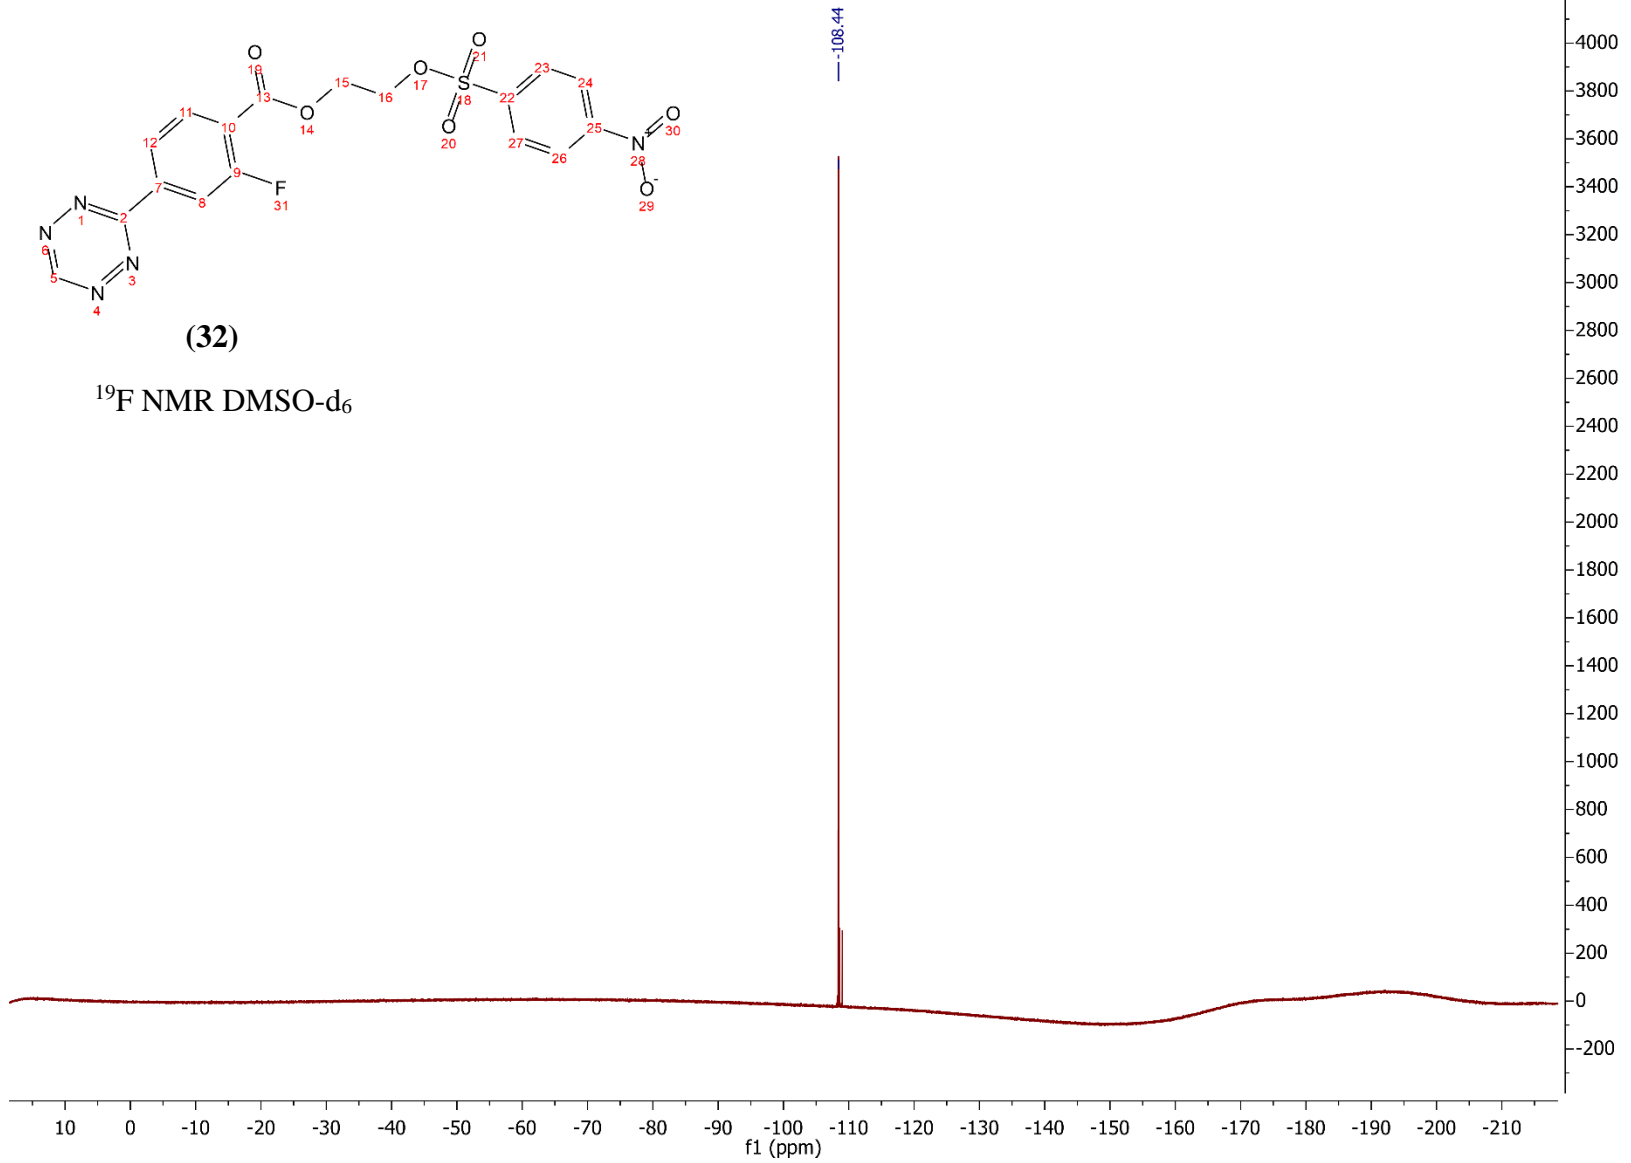

## References

- (1) Clark, P. G.; Guidry, E. N.; Chan, W. Y.; Steinmetz, W. E.; Grubbs, R. H. Synthesis of a Molecular Charm Bracelet via Click Cyclization and Olefin Metathesis Clipping. *J. Am. Chem. Soc.* **2010**, *132* (10), 3405–3412. <https://doi.org/10.1021/ja9090337>
- (2) Kurra, Y.; Odoi, K. A.; Lee, Y. J.; Yang, Y.; Lu, T.; Wheeler, S. E.; Torres-Kolbus, J.; Deiters, A.; Liu, W. R. Two Rapid Catalyst-Free Click Reactions for in Vivo Protein Labeling of Genetically Encoded Strained Alkene/Alkyne Functionalities. *Bioconjug. Chem.* **2014**, *25* (9), 1730–1738. <https://doi.org/10.1021/bc500361d>
- (3) Collins, J.; Waldmann, C. M.; Drake, C.; Slavik, R.; Ha, N. S.; Sergeev, M.; Lazari, M.; Shen, B.; Chin, F. T.; Moore, M.; et al. Production of Diverse PET Probes with Limited Resources: 24 <sup>18</sup>F-Labeled Compounds Prepared with a Single Radiosynthesizer. *Proc. Natl. Acad. Sci. U. S. A.* **2017**, *114* (43), 11309–11314. <https://doi.org/10.1073/pnas.1710466114>
- (4) Royzen, M.; Yap, G.; Fox, J. A Photochemical Synthesis of Functionalized Trans-Cyclooctenes Driven by Metal Complexation. *Chemtracts* **2008**, *21* (2), 46–48. <https://doi.org/10.1021/ja8001919>
- (5) Lee, S. J.; Oh, S. J.; Chi, D. Y.; Moon, D. H.; Ryu, J. S. High Yielding [<sup>18</sup>F]Fluorination Method by Fine Control of the Base. *Bull. Korean Chem. Soc.* **2012**, *33* (7), 2177–2180. <https://doi.org/10.5012/bkcs.2012.33.7.2177>
- (6) Weber, M.; Hellriegel, C.; Rueck, A.; Wuethrich, J.; Jenks, P.; Obkircher, M. Method Development in Quantitative NMR towards Metrologically Traceable Organic Certified Reference Materials Used as <sup>31</sup>P-QNMR Standards. *Anal. Bioanal. Chem.* **2015**, *407* (11), 3115–3123. <https://doi.org/10.1007/s00216-014-8306-6>
- (7) Rahman, O.; Erlandsson, M.; Blom, E.; Långström, B. Automated Synthesis Of <sup>18</sup>F-Labelled Analogs of Metomidate, Vorozole and Harmine Using Commercial Platform. *J. Label. Compd. Radiopharm.* **2010**, *53* (4), 169–171. <https://doi.org/10.1002/jlcr.1742>
- (8) Shen, B.; Jeon, J.; Palner, M.; Ye, D.; Shuhendler, A.; Chin, F. T.; Rao, J. Positron Emission Tomography Imaging of Drug-Induced Tumor Apoptosis with a Caspase-Triggered Nanoaggregation Probe. *Angew. Chemie - Int. Ed.* **2013**, *52* (40), 10511–10514. <https://doi.org/10.1002/anie.201303422>
- (9) Savisto, N.; Viljanen, T.; Kokkomäki, E.; Bergman, J.; Solin, O. Automated Production of [<sup>18</sup>F]FTHA According to GMP. *J. Label. Compd. Radiopharm.* **2018**, *61* (2), 84–93. <https://doi.org/10.1002/jlcr.3589>
- (10) Li, Z.; Cai, H.; Hassink, M.; Blackman, M. L.; Brown, R. C. D.; Conti, P. S.; Fox, J. M. Tetrazine-Trans-Cyclooctene Ligation for the Rapid Construction of <sup>18</sup>F-Labeled Probes. *Chem. Commun.* **2010**, *46* (42), 8043–8045. <https://doi.org/10.1039/C0CC03078C>
- (11) Denk, C.; Svatunek, D.; Filip, T.; Wanek, T.; Lumpi, D.; Frçhlich, J.; Kuntner, C.; Mikula, H. Development of a <sup>18</sup>F-Labeled Tetrazine with Favorable Pharmacokinetics for Bioorthogonal PET Imaging. *Angewandte*, **2014**, *53* (36), 9655–9659. <https://doi.org/10.1002/anie.201404277>
- (12) Stéen, E. J. L.; Shalgunov, V.; Denk, C.; Mikula, H.; Kjær, A.; Kristensen, J. L.; Herth, M. M. Convenient Entry to <sup>18</sup>F-Labeled Amines through the Staudinger Reduction. *Eur. J. Org. Chem.* **2019**, 1722–1725. <https://doi.org/10.1002/ejoc.201801457>
